# Supplementary material for: Targeting the Hsp90-Cdc37-client protein interaction to disrupt Hsp90 chaperone machinery
Source: J Hematol Oncol. 2018 Apr 27;11:59. doi: 10.1186/s13045-018-0602-8 (PMC5921262; doi:10.1186/s13045-018-0602-8)
Supplement: Supplementary file 1 — The sup. Excel file for the comprehensive analysis of Hsp90-Cdc37’s client proteins. Comprehensive Analysis of Hsp90-Cdc37’s client proteins by using FunRich tool. (XLSX 313 kb) [file 13045_2018_602_MOESM1_ESM.xlsx]

## Sheet: Client proteins of Hsp90-Cdc37 
Dataset name: Client proteins of Hsp90-Cdc37
No. of identified items: 267 of 284
No. of unidentified items: 17
ID type: GeneSymbol
Number of mapped gene: 267
Is dataset quantitative :NO
Mapped items:
Dataset item (Gene symbol )		Entrez ID	Gene symbol	Description	Alternate names	Chromosome	Map location
ABL1		25	ABL1	ABL proto-oncogene 1, non-receptor tyrosine kinase	ABL|JTK7|bcr/abl|c-ABL|c-ABL1|p150|v-abl	9	9q34.1
ACVR1		90	ACVR1	activin A receptor, type I	ACTRI|ACVR1A|ACVRLK2|ALK2|FOP|SKR1|TSRI	2	2q23-q24
ACVR1B		91	ACVR1B	activin A receptor, type IB	ACTRIB|ACVRLK4|ALK4|SKR2	12	12q13
ACVR1C		130399	ACVR1C	activin A receptor, type IC	ACVRLK7|ALK7	2	2q24.1
ACVR2B		93	ACVR2B	activin A receptor, type IIB	ACTRIIB|ActR-IIB|HTX4	3	3p22
ADRBK1		156	ADRBK1	adrenergic, beta, receptor kinase 1	BARK1|BETA-ARK1|GRK2	11	11q13.1
AKT1		207	AKT1	v-akt murine thymoma viral oncogene homolog 1	AKT|CWS6|PKB|PKB-ALPHA|PRKBA|RAC|RAC-ALPHA	14	14q32.32
AKT2		208	AKT2	v-akt murine thymoma viral oncogene homolog 2	HIHGHH|PKBB|PKBBETA|PRKBB|RAC-BETA	19	19q13.1-q13.2
AKT3		10000	AKT3	v-akt murine thymoma viral oncogene homolog 3	MPPH|MPPH2|PKB-GAMMA|PKBG|PRKBG|RAC-PK-gamma|RAC-gamma|STK-2	1	1q44
ALK		238	ALK	anaplastic lymphoma receptor tyrosine kinase	CD246|NBLST3	2	2p23
AMHR2		269	AMHR2	anti-Mullerian hormone receptor, type II	AMHR|MISR2|MISRII|MRII	12	12q13
AR		367	AR	androgen receptor	AIS|AR8|DHTR|HUMARA|HYSP1|KD|NR3C4|SBMA|SMAX1|TFM	X	Xq12
ARAF		369	ARAF	A-Raf proto-oncogene, serine/threonine kinase	A-RAF|ARAF1|PKS2|RAFA1	X	Xp11.4-p11.2
AURKB		9212	AURKB	aurora kinase B	AIK2|AIM-1|AIM1|ARK2|AurB|IPL1|PPP1R48|STK12|STK5|aurkb-sv1|aurkb-sv2	17	17p13.1
AURKC		6795	AURKC	aurora kinase C	AIE2|AIK3|ARK3|AurC|HEL-S-90|SPGF5|STK13|aurora-C	19	19q13.43
AXL		558	AXL	AXL receptor tyrosine kinase	ARK|JTK11|Tyro7|UFO	19	19q13.1
BLK		640	BLK	BLK proto-oncogene, Src family tyrosine kinase	MODY11	8	8p23-p22
BMP2K		55589	BMP2K	BMP2 inducible kinase	BIKE|HRIHFB2017	4	4q21.21
BMPR1A		657	BMPR1A	bone morphogenetic protein receptor, type IA	10q23del|ACVRLK3|ALK3|CD292|SKR5	10	10q22.3
BMX		660	BMX	BMX non-receptor tyrosine kinase	ETK|PSCTK2|PSCTK3	X	Xp22.2
BRAF		673	BRAF	B-Raf proto-oncogene, serine/threonine kinase	B-RAF1|BRAF1|NS7|RAFB1	7	7q34
BTK		695	BTK	Bruton agammaglobulinemia tyrosine kinase	AGMX1|AT|ATK|BPK|IMD1|PSCTK1|XLA	X	Xq21.33-q22
CAMK1G		57172	CAMK1G	calcium/calmodulin-dependent protein kinase IG	CLICK3|CLICKIII|VWS1|dJ272L16.1	1	1q32.2
CAMK2A		815	CAMK2A	calcium/calmodulin-dependent protein kinase II alpha	CAMKA	5	5q32
CAMK2B		816	CAMK2B	calcium/calmodulin-dependent protein kinase II beta	CAM2|CAMK2|CAMKB	7	7p14.3-p14.1
CAMK2D		817	CAMK2D	calcium/calmodulin-dependent protein kinase II delta	CAMKD	4	4q26
CAMK2G		818	CAMK2G	calcium/calmodulin-dependent protein kinase II gamma	CAMK|CAMK-II|CAMKG	10	10q22
CAMK4		814	CAMK4	calcium/calmodulin-dependent protein kinase IV	CaMK IV|CaMK-GR|IV|caMK	5	5q21.3
CAMKK1		84254	CAMKK1	calcium/calmodulin-dependent protein kinase kinase 1, alpha	CAMKKA	17	17p13.2
CAMKK2		10645	CAMKK2	calcium/calmodulin-dependent protein kinase kinase 2, beta	CAMKK|CAMKKB	12	12q24.2
CAMKV		79012	CAMKV	CaM kinase-like vesicle-associated	1G5|VACAMKL	3	3p21.31
CDC25C		995	CDC25C	cell division cycle 25C	CDC25|PPP1R60	5	5q31
CDC7		8317	CDC7	cell division cycle 7	CDC7L1|HsCDC7|Hsk1|huCDC7	1	1p22
CDK1		983	CDK1	cyclin-dependent kinase 1	CDC2|CDC28A|P34CDC2	10	10q21.1
CDK10		8558	CDK10	cyclin-dependent kinase 10	PISSLRE	16	16q24
CDK11A		728642	CDK11A	cyclin-dependent kinase 11A	CDC2L2|CDC2L3|CDK11-p110|CDK11-p46|CDK11-p58|PITSLRE|p58GTA	1	1p36.33
CDK11B		984	CDK11B	cyclin-dependent kinase 11B	CDC2L1|CDK11|CDK11-p110|CDK11-p46|CDK11-p58|CLK-1|PITSLREA|PK58|p58|p58CDC2L1|p58CLK-1	1	1p36.33
CDK14		5218	CDK14	cyclin-dependent kinase 14	PFTAIRE1|PFTK1	7	7q21-q22
CDK15		65061	CDK15	cyclin-dependent kinase 15	ALS2CR7|PFTAIRE2|PFTK2	2	2q33.2
CDK17		5128	CDK17	cyclin-dependent kinase 17	PCTAIRE2|PCTK2	12	12q23.1
CDK18		5129	CDK18	cyclin-dependent kinase 18	PCTAIRE|PCTAIRE3|PCTK3	1	1q31-q32
CDK19		23097	CDK19	cyclin-dependent kinase 19	CDC2L6|CDK11|bA346C16.3	6	6q21
CDK2		1017	CDK2	cyclin-dependent kinase 2	CDKN2|p33(CDK2)	12	12q13
CDK20		23552	CDK20	cyclin-dependent kinase 20	CCRK|CDCH|P42|PNQALRE	9	9q22.1
CDK4		1019	CDK4	cyclin-dependent kinase 4	CMM3|PSK-J3	12	12q14
CDK6		1021	CDK6	cyclin-dependent kinase 6	MCPH12|PLSTIRE	7	7q21-q22
CDK9		1025	CDK9	cyclin-dependent kinase 9	C-2k|CDC2L4|CTK1|PITALRE|TAK	9	9q34.1
CDKL4		344387	CDKL4	cyclin-dependent kinase-like 4	-	2	2p22.1
CHEK1		1111	CHEK1	checkpoint kinase 1	CHK1	11	11q24.2
CHUK		1147	CHUK	conserved helix-loop-helix ubiquitous kinase	IKBKA|IKK-alpha|IKK1|IKKA|NFKBIKA|TCF16	10	10q24-q25
CLK2		1196	CLK2	CDC-like kinase 2	-	1	1q21
CLK3		1198	CLK3	CDC-like kinase 3	PHCLK3|PHCLK3/152	15	15q24
CSF1R		1436	CSF1R	colony stimulating factor 1 receptor	C-FMS|CD115|CSF-1R|CSFR|FIM2|FMS|HDLS|M-CSF-R	5	5q32
CSNK1D		1453	CSNK1D	casein kinase 1, delta	ASPS|CKIdelta|FASPS2|HCKID	17	17q25
CSNK2A1		1457	CSNK2A1	casein kinase 2, alpha 1 polypeptide	CK2A1|CKII|CSNK2A3	20	20p13
DAPK1		1612	DAPK1	death-associated protein kinase 1	DAPK	9	9q21.33
DAPK2		23604	DAPK2	death-associated protein kinase 2	DRP-1|DRP1	15	15q22.31
DAPK3		1613	DAPK3	death-associated protein kinase 3	DLK|ZIP|ZIPK	19	19p13.3
DCLK2		166614	DCLK2	doublecortin-like kinase 2	CL2|CLICK-II|CLICK2|CLIK2|DCAMKL2|DCDC3|DCDC3B|DCK2	4	4q31.3
DDR1		780	DDR1	discoidin domain receptor tyrosine kinase 1	CAK|CD167|DDR|EDDR1|HGK2|MCK10|NEP|NTRK4|PTK3|PTK3A|RTK6|TRKE	6	6p21.3
DDR2		4921	DDR2	discoidin domain receptor tyrosine kinase 2	MIG20a|NTRKR3|TKT|TYRO10	1	1q23.3
DMPK		1760	DMPK	dystrophia myotonica-protein kinase	DM|DM1|DM1PK|DMK|MDPK|MT-PK	19	19q13.3
DPF1		8193	DPF1	D4, zinc and double PHD fingers family 1	BAF45b|NEUD4|neuro-d4	19	19q13.2
DSTYK		25778	DSTYK	dual serine/threonine and tyrosine protein kinase	CAKUT1|DustyPK|HDCMD38P|RIP5|RIPK5	1	1q32.1
DUS3L		56931	DUS3L	dihydrouridine synthase 3-like	DUS3	19	19p13.3
DYRK1A		1859	DYRK1A	dual-specificity tyrosine-(Y)-phosphorylation regulated kinase 1A	DYRK|DYRK1|HP86|MNB|MNBH|MRD7	21	21q22.13
DYRK1B		9149	DYRK1B	dual-specificity tyrosine-(Y)-phosphorylation regulated kinase 1B	AOMS3|MIRK	19	19q13.2
DYRK2		8445	DYRK2	dual-specificity tyrosine-(Y)-phosphorylation regulated kinase 2	-	12	12q15
DYRK4		8798	DYRK4	dual-specificity tyrosine-(Y)-phosphorylation regulated kinase 4	-	12	12p13.32
EGFR		1956	EGFR	epidermal growth factor receptor	ERBB|ERBB1|HER1|NISBD2|PIG61|mENA	7	7p12
EIF2AK1		27102	EIF2AK1	eukaryotic translation initiation factor 2-alpha kinase 1	HCR|HRI	7	7p22
EIF2AK2		5610	EIF2AK2	eukaryotic translation initiation factor 2-alpha kinase 2	EIF2AK1|PKR|PPP1R83|PRKR	2	2p22-p21
ELK3		2004	ELK3	ELK3, ETS-domain protein (SRF accessory protein 2)	ERP|NET|SAP-2|SAP2	12	12q23
EPHA1		2041	EPHA1	EPH receptor A1	EPH|EPHT|EPHT1	7	7q34
EPHA10		284656	EPHA10	EPH receptor A10	-	1	1p34.3
EPHA2		1969	EPHA2	EPH receptor A2	ARCC2|CTPA|CTPP1|CTRCT6|ECK	1	1p36
EPHA4		2043	EPHA4	EPH receptor A4	HEK8|SEK|TYRO1	2	2q36.1
EPHB1		2047	EPHB1	EPH receptor B1	ELK|EPHT2|Hek6|NET	3	3q21-q23
EPHB6		2051	EPHB6	EPH receptor B6	HEP	7	7q33-q35
ERBB2		2064	ERBB2	erb-b2 receptor tyrosine kinase 2	CD340|HER-2|HER-2/neu|HER2|MLN 19|NEU|NGL|TKR1	17	17q12
ERBB3		2065	ERBB3	erb-b2 receptor tyrosine kinase 3	ErbB-3|HER3|LCCS2|MDA-BF-1|c-erbB-3|c-erbB3|erbB3-S|p180-ErbB3|p45-sErbB3|p85-sErbB3	12	12q13
ERBB4		2066	ERBB4	erb-b2 receptor tyrosine kinase 4	ALS19|HER4|p180erbB4	2	2q33.3-q34
ERN1		2081	ERN1	endoplasmic reticulum to nucleus signaling 1	IRE1|IRE1P|IRE1a|hIRE1p	17	17q24.2
FASTK		10922	FASTK	Fas-activated serine/threonine kinase	FAST	7	7q35
FER		2241	FER	fer (fps/fes related) tyrosine kinase	PPP1R74|TYK3|p94-Fer	5	5q21
FES		2242	FES	FES proto-oncogene, tyrosine kinase	FPS	15	15q26.1
FGFR1		2260	FGFR1	fibroblast growth factor receptor 1	BFGFR|CD331|CEK|FGFBR|FGFR-1|FLG|FLT-2|FLT2|HBGFR|HH2|HRTFDS|KAL2|N-SAM|OGD|bFGF-R-1	8	8p11.23-p11.22
FGFR3		2261	FGFR3	fibroblast growth factor receptor 3	ACH|CD333|CEK2|HSFGFR3EX|JTK4	4	4p16.3
FGR		2268	FGR	FGR proto-oncogene, Src family tyrosine kinase	SRC2|c-fgr|c-src2|p55-Fgr|p55c-fgr|p58-Fgr|p58c-fgr	1	1p36.2-p36.1
FLT3		2322	FLT3	fms-related tyrosine kinase 3	CD135|FLK-2|FLK2|STK1	13	13q12
FLT4		2324	FLT4	fms-related tyrosine kinase 4	FLT41|LMPH1A|PCL|VEGFR3	5	5q35.3
FRK		2444	FRK	fyn-related Src family tyrosine kinase	GTK|PTK5|RAK	6	6q21-q22.3
FYN		2534	FYN	FYN proto-oncogene, Src family tyrosine kinase	SLK|SYN|p59-FYN	6	6q21
GRK4		2868	GRK4	G protein-coupled receptor kinase 4	GPRK2L|GPRK4|GRK4a|IT11	4	4p16.3
GRK6		2870	GRK6	G protein-coupled receptor kinase 6	GPRK6	5	5q35
GRK7		131890	GRK7	G protein-coupled receptor kinase 7	GPRK7	3	3q24
GSG2		83903	GSG2	germ cell associated 2 (haspin)	HASPIN	17	17p13
GSK3A		2931	GSK3A	glycogen synthase kinase 3 alpha	-	19	19q13.2
GTF2F1		2962	GTF2F1	general transcription factor IIF, polypeptide 1, 74kDa	BTF4|RAP74|TF2F1|TFIIF	19	19p13.3
HCK		3055	HCK	HCK proto-oncogene, Src family tyrosine kinase	JTK9|p59Hck|p61Hck	20	20q11-q12
HIPK4		147746	HIPK4	homeodomain interacting protein kinase 4	-	19	19q13.2
ICK		22858	ICK	intestinal cell (MAK-like) kinase	ECO|LCK2|MRK	6	6p12.1
IGF1R		3480	IGF1R	insulin-like growth factor 1 receptor	CD221|IGFIR|IGFR|JTK13	15	15q26.3
IKBKB		3551	IKBKB	inhibitor of kappa light polypeptide gene enhancer in B-cells, kinase beta	IKK-beta|IKK2|IKKB|IMD15|NFKBIKB	8	8p11.2
INSRR		3645	INSRR	insulin receptor-related receptor	IRR	1	1q21-q23
IRAK1		3654	IRAK1	interleukin-1 receptor-associated kinase 1	IRAK|pelle	X	Xq28
IRAK2		3656	IRAK2	interleukin-1 receptor-associated kinase 2	IRAK-2	3	3p25.3
IRAK3		11213	IRAK3	interleukin-1 receptor-associated kinase 3	ASRT5|IRAKM	12	12q14.3
ITK		3702	ITK	IL2-inducible T-cell kinase	EMT|LPFS1|LYK|PSCTK2	5	5q31-q32
JAK1		3716	JAK1	Janus kinase 1	JAK1A|JAK1B|JTK3	1	1p32.3-p31.3
KIT		3815	KIT	v-kit Hardy-Zuckerman 4 feline sarcoma viral oncogene homolog	C-Kit|CD117|PBT|SCFR	4	4q12
KSR1		8844	KSR1	kinase suppressor of ras 1	KSR|RSU2	17	17q11.2
KSR2		283455	KSR2	kinase suppressor of ras 2	-	12	12q24.22-q24.23
LCK		3932	LCK	LCK proto-oncogene, Src family tyrosine kinase	IMD22|LSK|YT16|p56lck|pp58lck	1	1p34.3
LIMK1		3984	LIMK1	LIM domain kinase 1	LIMK|LIMK-1	7	7q11.23
LIMK2		3985	LIMK2	LIM domain kinase 2	-	22	22q12.2
LMX1B		4010	LMX1B	LIM homeobox transcription factor 1, beta	LMX1.2|NPS1	9	9q33.3
LRRK2		120892	LRRK2	leucine-rich repeat kinase 2	AURA17|DARDARIN|PARK8|RIPK7|ROCO2	12	12q12
LYN		4067	LYN	LYN proto-oncogene, Src family tyrosine kinase	JTK8|p53Lyn|p56Lyn	8	8q13
MAP2K5		5607	MAP2K5	mitogen-activated protein kinase kinase 5	HsT17454|MAPKK5|MEK5|PRKMK5	15	15q23
MAP2K6		5608	MAP2K6	mitogen-activated protein kinase kinase 6	MAPKK6|MEK6|MKK6|PRKMK6|SAPKK-3|SAPKK3	17	17q24.3
MAP2K7		5609	MAP2K7	mitogen-activated protein kinase kinase 7	JNKK2|MAPKK7|MEK|MEK 7|MKK7|PRKMK7|SAPKK-4|SAPKK4	19	19p13.3-p13.2
MAP3K1		4214	MAP3K1	mitogen-activated protein kinase kinase kinase 1, E3 ubiquitin protein ligase	MAPKKK1|MEKK|MEKK 1|MEKK1|SRXY6	5	5q11.2
MAP3K11		4296	MAP3K11	mitogen-activated protein kinase kinase kinase 11	MEKK11|MLK-3|MLK3|PTK1|SPRK	11	11q13.1-q13.3
MAP3K12		7786	MAP3K12	mitogen-activated protein kinase kinase kinase 12	DLK|MEKK12|MUK|ZPK|ZPKP1	12	12q13
MAP3K14		9020	MAP3K14	mitogen-activated protein kinase kinase kinase 14	FTDCR1B|HS|HSNIK|NIK	17	17q21
MAP3K15		389840	MAP3K15	mitogen-activated protein kinase kinase kinase 15	ASK3|bA723P2.3	X	Xp22.12
MAP3K2		10746	MAP3K2	mitogen-activated protein kinase kinase kinase 2	MEKK2|MEKK2B	2	2q14.3
MAP3K3		4215	MAP3K3	mitogen-activated protein kinase kinase kinase 3	MAPKKK3|MEKK3	17	17q23.3
MAP3K5		4217	MAP3K5	mitogen-activated protein kinase kinase kinase 5	ASK1|MAPKKK5|MEKK5	6	6q22.33
MAP3K6		9064	MAP3K6	mitogen-activated protein kinase kinase kinase 6	ASK2|MAPKKK6|MEKK6	1	1p36.11
MAP3K7		6885	MAP3K7	mitogen-activated protein kinase kinase kinase 7	MEKK7|TAK1|TGF1a	6	6q15
MAP3K8		1326	MAP3K8	mitogen-activated protein kinase kinase kinase 8	AURA2|COT|EST|ESTF|MEKK8|TPL2|Tpl-2|c-COT	10	10p11.23
MAP3K9		4293	MAP3K9	mitogen-activated protein kinase kinase kinase 9	MEKK9|MLK1|PRKE1	14	14q24.2
MAP4K1		11184	MAP4K1	mitogen-activated protein kinase kinase kinase kinase 1	HPK1	19	19q13.1-q13.4
MAP4K2		5871	MAP4K2	mitogen-activated protein kinase kinase kinase kinase 2	BL44|GCK|RAB8IP	11	11q13
MAP4K4		9448	MAP4K4	mitogen-activated protein kinase kinase kinase kinase 4	FLH21957|HEL-S-31|HGK|MEKKK4|NIK	2	2q11.2-q12
MAPK13		5603	MAPK13	mitogen-activated protein kinase 13	MAPK 13|MAPK-13|PRKM13|SAPK4|p38delta	6	6p21.31
MAPK14		1432	MAPK14	mitogen-activated protein kinase 14	CSBP|CSBP1|CSBP2|CSPB1|EXIP|Mxi2|PRKM14|PRKM15|RK|SAPK2A|p38|p38ALPHA	6	6p21.3-p21.2
MAPK3		5595	MAPK3	mitogen-activated protein kinase 3	ERK-1|ERK1|ERT2|HS44KDAP|HUMKER1A|P44ERK1|P44MAPK|PRKM3|p44-ERK1|p44-MAPK	16	16p11.2
MAPK4		5596	MAPK4	mitogen-activated protein kinase 4	ERK-4|ERK4|PRKM4|p63-MAPK|p63MAPK	18	18q21.1
MAPK7		5598	MAPK7	mitogen-activated protein kinase 7	BMK1|ERK4|ERK5|PRKM7	17	17p11.2
MAPT		4137	MAPT	microtubule-associated protein tau	DDPAC|FTDP-17|MAPTL|MSTD|MTBT1|MTBT2|PPND|PPP1R103|TAU	17	17q21.1
MAST2		23139	MAST2	microtubule associated serine/threonine kinase 2	MAST205|MTSSK	1	1p34.1
MATK		4145	MATK	megakaryocyte-associated tyrosine kinase	CHK|CTK|HHYLTK|HYL|HYLTK|Lsk	19	19p13.3
MEF2B		100271849	MEF2B	myocyte enhancer factor 2B	RSRFR2	19	19p13.11
MERTK		10461	MERTK	MER proto-oncogene, tyrosine kinase	MER|RP38|Tyro12|c-Eyk|c-mer	2	2q14.1
MINK1		50488	MINK1	misshapen-like kinase 1	B55|MAP4K6|MINK|YSK2|ZC3|hMINK|hMINKbeta	17	17p13.2
MOS		4342	MOS	v-mos Moloney murine sarcoma viral oncogene homolog	MSV	8	8q11
MRPL28		10573	MRPL28	mitochondrial ribosomal protein L28	MAAT1|p15	16	16p13.3
MUSK		4593	MUSK	muscle, skeletal, receptor tyrosine kinase	CMS9	9	9q31.3-q32
MYLK2		85366	MYLK2	myosin light chain kinase 2	KMLC|MLCK|MLCK2|skMLCK	20	20q13.31
MYLK3		91807	MYLK3	myosin light chain kinase 3	MLCK|MLCK2|caMLCK	16	16q11.2
MYLK4		340156	MYLK4	myosin light chain kinase family, member 4	SgK085	6	6p25.2
MYO3B		140469	MYO3B	myosin IIIB	-	2	2q31.1-q31.2
NEK11		79858	NEK11	NIMA-related kinase 11	-	3	3q22.1
NEK8		284086	NEK8	NIMA-related kinase 8	JCK|NEK12A|NPHP9|RHPD2	17	17q11.1
NEK9		91754	NEK9	NIMA-related kinase 9	NERCC|NERCC1|Nek8	14	14q24.3
NLK		51701	NLK	nemo-like kinase	-	17	17q11.2
NOC4L		79050	NOC4L	nucleolar complex associated 4 homolog	NET49|NOC4|UTP19	12	12q24.33
NPR2		4882	NPR2	natriuretic peptide receptor 2	AMDM|ANPRB|ANPb|ECDM|GUC2B|GUCY2B|NPRB|NPRBi	9	9p21-p12
NR3C1		2908	NR3C1	nuclear receptor subfamily 3, group C, member 1 (glucocorticoid receptor)	GCCR|GCR|GCRST|GR|GRL	5	5q31.3
NRBP1		29959	NRBP1	nuclear receptor binding protein 1	BCON3|MADM|MUDPNP|NRBP	2	2p23
NTRK1		4914	NTRK1	neurotrophic tyrosine kinase, receptor, type 1	MTC|TRK|TRK1|TRKA|Trk-A|p140-TrkA	1	1q21-q22
NTRK2		4915	NTRK2	neurotrophic tyrosine kinase, receptor, type 2	GP145-TrkB|TRKB|trk-B	9	9q22.1
NTRK3		4916	NTRK3	neurotrophic tyrosine kinase, receptor, type 3	GP145-TrkC|TRKC|gp145(trkC)	15	15q25
OCA2		4948	OCA2	oculocutaneous albinism II	BEY|BEY1|BEY2|BOCA|D15S12|EYCL|EYCL2|EYCL3|HCL3|P|PED|SHEP1	15	15q
PAK6		56924	PAK6	p21 protein (Cdc42/Rac)-activated kinase 6	PAK5	15	15q14
PAK7		57144	PAK7	p21 protein (Cdc42/Rac)-activated kinase 7	PAK5	20	20p12
PASK		23178	PASK	PAS domain containing serine/threonine kinase	PASKIN|STK37	2	2q37.3
PDGFRA		5156	PDGFRA	platelet-derived growth factor receptor, alpha polypeptide	CD140A|PDGFR-2|PDGFR2|RHEPDGFRA	4	4q12
PDGFRB		5159	PDGFRB	platelet-derived growth factor receptor, beta polypeptide	CD140B|IBGC4|IMF1|JTK12|PDGFR|PDGFR-1|PDGFR1	5	5q33.1
PDIK1L		149420	PDIK1L	PDLIM1 interacting kinase 1 like	CLIK1L|STK35L2	1	1p36.11
PDPK1		5170	PDPK1	3-phosphoinositide dependent protein kinase 1	PDK1|PDPK2|PDPK2P|PRO0461	16	16p13.3
PHKG2		5261	PHKG2	phosphorylase kinase, gamma 2 (testis)	GSD9C	16	16p11.2
PIM1		5292	PIM1	Pim-1 proto-oncogene, serine/threonine kinase	PIM	6	6p21.2
PIM2		11040	PIM2	Pim-2 proto-oncogene, serine/threonine kinase	-	X	Xp11.23
PIM3		415116	PIM3	Pim-3 proto-oncogene, serine/threonine kinase	pim-3	22	22q13
PINK1		65018	PINK1	PTEN induced putative kinase 1	BRPK|PARK6	1	1p36
PITX2		5308	PITX2	paired-like homeodomain 2	ARP1|Brx1|IDG2|IGDS|IGDS2|IHG2|IRID2|Otlx2|PTX2|RGS|RIEG|RIEG1|RS	4	4q25
PKMYT1		9088	PKMYT1	protein kinase, membrane associated tyrosine/threonine 1	MYT1|PPP1R126	16	16p13.3
PKN1		5585	PKN1	protein kinase N1	DBK|PAK-1|PAK1|PKN|PKN-ALPHA|PRK1|PRKCL1	19	19p13.12
PKN2		5586	PKN2	protein kinase N2	PAK2|PRK2|PRKCL2|PRO2042|Pak-2|STK7	1	1p22.2
PRKAA2		5563	PRKAA2	protein kinase, AMP-activated, alpha 2 catalytic subunit	AMPK|AMPK2|AMPKa2|PRKAA	1	1p31
PRKACA		5566	PRKACA	protein kinase, cAMP-dependent, catalytic, alpha	PKACA|PPNAD4	19	19p13.1
PRKACG		5568	PRKACG	protein kinase, cAMP-dependent, catalytic, gamma	BDPLT19|KAPG|PKACg	9	9q13
PRKCA		5578	PRKCA	protein kinase C, alpha	AAG6|PKC-alpha|PKCA|PRKACA	17	17q22-q23.2
PRKCB		5579	PRKCB	protein kinase C, beta	PKC-beta|PKCB|PRKCB1|PRKCB2	16	16p11.2
PRKCE		5581	PRKCE	protein kinase C, epsilon	PKCE|nPKC-epsilon	2	2p21
PRKCG		5582	PRKCG	protein kinase C, gamma	PKC-gamma|PKCC|PKCG|SCA14	19	19q13.4
PRKCH		5583	PRKCH	protein kinase C, eta	PKC-L|PKCL|PRKCL|nPKC-eta	14	14q23.1
PRKCQ		5588	PRKCQ	protein kinase C, theta	PRKCT|nPKC-theta	10	10p15
PRKCZ		5590	PRKCZ	protein kinase C, zeta	PKC-ZETA|PKC2	1	1p36.33-p36.2
PRKD1		5587	PRKD1	protein kinase D1	PKC-MU|PKCM|PKD|PRKCM	14	14q11
PRKD2		25865	PRKD2	protein kinase D2	HSPC187|PKD2|nPKC-D2	19	19q13.3
PRKG2		5593	PRKG2	protein kinase, cGMP-dependent, type II	PRKGR2|cGK2|cGKII	4	4q13.1-q21.1
PRKX		5613	PRKX	protein kinase, X-linked	PKX1	X	Xp22.3
PSKH1		5681	PSKH1	protein serine kinase H1	-	16	16q22.1
PSKH2		85481	PSKH2	protein serine kinase H2	-	8	8q21.3
PTK2		5747	PTK2	protein tyrosine kinase 2	FADK|FAK|FAK1|FRNK|PPP1R71|p125FAK|pp125FAK	8	8q24.3
PTK2B		2185	PTK2B	protein tyrosine kinase 2 beta	CADTK|CAKB|FADK2|FAK2|PKB|PTK|PYK2|RAFTK	8	8p21.1
PTK6		5753	PTK6	protein tyrosine kinase 6	BRK	20	20q13.3
RAF1		5894	RAF1	Raf-1 proto-oncogene, serine/threonine kinase	CMD1NN|CRAF|NS5|Raf-1|c-Raf	3	3p25
RET		5979	RET	ret proto-oncogene	CDHF12|CDHR16|HSCR1|MEN2A|MEN2B|MTC1|PTC|RET-ELE1|RET51	10	10q11.2
RIPK1		8737	RIPK1	receptor (TNFRSF)-interacting serine-threonine kinase 1	RIP|RIP1	6	6p25.2
RIPK2		8767	RIPK2	receptor-interacting serine-threonine kinase 2	CARD3|CARDIAK|CCK|GIG30|RICK|RIP2	8	8q21
RIPK3		11035	RIPK3	receptor-interacting serine-threonine kinase 3	RIP3	14	14q11.2
ROR2		4920	ROR2	receptor tyrosine kinase-like orphan receptor 2	BDB|BDB1|NTRKR2	9	9q22
RPS6KA1		6195	RPS6KA1	ribosomal protein S6 kinase, 90kDa, polypeptide 1	HU-1|MAPKAPK1A|RSK|RSK1|p90Rsk	1	1p
RPS6KA2		6196	RPS6KA2	ribosomal protein S6 kinase, 90kDa, polypeptide 2	HU-2|MAPKAPK1C|RSK|RSK3|S6K-alpha|S6K-alpha2|p90-RSK3|pp90RSK3	6	6q27
RPS6KA3		6197	RPS6KA3	ribosomal protein S6 kinase, 90kDa, polypeptide 3	CLS|HU-3|ISPK-1|MAPKAPK1B|MRX19|RSK|RSK2|S6K-alpha3|p90-RSK2|pp90RSK2	X	Xp22.2-p22.1
RPS6KA4		8986	RPS6KA4	ribosomal protein S6 kinase, 90kDa, polypeptide 4	MSK2|RSK-B	11	11q11-q13
RPS6KA5		9252	RPS6KA5	ribosomal protein S6 kinase, 90kDa, polypeptide 5	MSK1|MSPK1|RLPK	14	14q31-q32.1
RPS6KA6		27330	RPS6KA6	ribosomal protein S6 kinase, 90kDa, polypeptide 6	PP90RSK4|RSK4	X	Xq21
RPS6KC1		26750	RPS6KC1	ribosomal protein S6 kinase, 52kDa, polypeptide 1	RPK118|RSKL1|S6K-delta-1|S6PKh1|humS6PKh1	1	1q41
RYK		6259	RYK	receptor-like tyrosine kinase	D3S3195|JTK5|JTK5A|RYK1	3	3q22
SGK2		10110	SGK2	serum/glucocorticoid regulated kinase 2	H-SGK2|dJ138B7.2	20	20q13.2
SGK3		23678	SGK3	serum/glucocorticoid regulated kinase family, member 3	CISK|SGK2|SGKL	8	8q12
SIK1		150094	SIK1	salt-inducible kinase 1	EIEE30|MSK|SIK|SNF1LK	21	21q22.3
SLK		9748	SLK	STE20-like kinase	LOSK|STK2|bA16H23.1|se20-9	10	10q24.33
SRC		6714	SRC	SRC proto-oncogene, non-receptor tyrosine kinase	ASV|SRC1|c-SRC|p60-Src	20	20q12-q13
STK11		6794	STK11	serine/threonine kinase 11	LKB1|PJS|hLKB1	19	19p13.3
STK16		8576	STK16	serine/threonine kinase 16	KRCT|MPSK|PKL12|TSF1	2	2q35
STK3		6788	STK3	serine/threonine kinase 3	KRS1|MST2	8	8q22.2
STK32A		202374	STK32A	serine/threonine kinase 32A	YANK1	5	5q32
STK32B		55351	STK32B	serine/threonine kinase 32B	HSA250839|STK32|STKG6|YANK2	4	4p16.2
STK32C		282974	STK32C	serine/threonine kinase 32C	PKE|YANK3	10	10q26.3
STK33		65975	STK33	serine/threonine kinase 33	-	11	11p15.3
STK36		27148	STK36	serine/threonine kinase 36	FU	2	2q35
STK38		11329	STK38	serine/threonine kinase 38	NDR|NDR1	6	6p21
STK38L		23012	STK38L	serine/threonine kinase 38 like	NDR2	12	12p11.23
STYK1		55359	STYK1	serine/threonine/tyrosine kinase 1	NOK|SuRTK106	12	12p13.2
TAOK3		51347	TAOK3	TAO kinase 3	DPK|JIK|MAP3K18	12	12q
TARDBP		23435	TARDBP	TAR DNA binding protein	ALS10|TDP-43	1	1p36.22
TBK1		29110	TBK1	TANK-binding kinase 1	NAK|T2K	12	12q14.1
TESK1		7016	TESK1	testis-specific kinase 1	-	9	9p13
TESK2		10420	TESK2	testis-specific kinase 2	-	1	1p32
TGFBR1		7046	TGFBR1	transforming growth factor, beta receptor 1	AAT5|ACVRLK4|ALK-5|ALK5|ESS1|LDS1|LDS1A|LDS2A|MSSE|SKR4|TGFR-1|tbetaR-I	9	9q22
TGFBR2		7048	TGFBR2	transforming growth factor, beta receptor II (70/80kDa)	AAT3|FAA3|LDS1B|LDS2|LDS2B|MFS2|RIIC|TAAD2|TGFR-2|TGFbeta-RII	3	3p22
TIE1		7075	TIE1	tyrosine kinase with immunoglobulin-like and EGF-like domains 1	JTK14|TIE	1	1p34-p33
TNK1		8711	TNK1	tyrosine kinase, non-receptor, 1	-	17	17p13.1
TNK2		10188	TNK2	tyrosine kinase, non-receptor, 2	ACK|ACK-1|ACK1|p21cdc42Hs	3	3q29
TNNI3K		51086	TNNI3K	TNNI3 interacting kinase	CARK|CCDD	1	1p31.1
TP53RK		112858	TP53RK	TP53 regulating kinase	BUD32|C20orf64|Nori-2|Nori-2p|PRPK|dJ101A2	20	20q13.2
TSSK1B		83942	TSSK1B	testis-specific serine kinase 1B	FKSG81|SPOGA4|STK22D|TSK1|TSSK1	5	5q22.2
TSSK2		23617	TSSK2	testis-specific serine kinase 2	DGS-G|SPOGA2|STK22B|TSK2	22	22q11.21
TSSK3		81629	TSSK3	testis-specific serine kinase 3	SPOGA3|STK22C|STK22D|TSK3	1	1p35-p34
TSSK6		83983	TSSK6	testis-specific serine kinase 6	CT72|FKSG82|SSTK|TSSK4	19	19p13.11
TTK		7272	TTK	TTK protein kinase	CT96|ESK|MPH1|MPS1|MPS1L1|PYT	6	6q14.1
TUT1		64852	TUT1	terminal uridylyl transferase 1, U6 snRNA-specific	PAPD2|RBM21|STARPAP|TUTase|URLC6	11	11q12.2
TYK2		7297	TYK2	tyrosine kinase 2	IMD35|JTK1	19	19p13.2
TYRO3		7301	TYRO3	TYRO3 protein tyrosine kinase	BYK|Dtk|Etk-2|RSE|Rek|Sky|Tif	15	15q15
UHMK1		127933	UHMK1	U2AF homology motif (UHM) kinase 1	KIS|KIST|P-CIP2	1	1q23.3
ULK1		8408	ULK1	unc-51 like autophagy activating kinase 1	ATG1|ATG1A|UNC51|Unc51.1|hATG1	12	12q24.3
ULK2		9706	ULK2	unc-51 like autophagy activating kinase 2	ATG1B|Unc51.2	17	17p11.2
VAV3		10451	VAV3	vav 3 guanine nucleotide exchange factor	-	1	1p13.3
VSX2		338917	VSX2	visual system homeobox 2	CHX10|HOX10|MCOP2|MCOPCB3|RET1	14	14q24.3
WNK4		65266	WNK4	WNK lysine deficient protein kinase 4	PHA2B|PRKWNK4	17	17q21-q22
YES1		7525	YES1	YES proto-oncogene 1, Src family tyrosine kinase	HsT441|P61-YES|Yes|c-yes	18	18p11.31-p11.21
ZAP70		7535	ZAP70	zeta-chain (TCR) associated protein kinase 70kDa	SRK|STCD|STD|TZK|ZAP-70	2	2q12
ZBTB40		9923	ZBTB40	zinc finger and BTB domain containing 40	ZNF923	1	1p36
ZGPAT		84619	ZGPAT	zinc finger, CCCH-type with G patch domain	GPATC6|GPATCH6|KIAA1847|ZC3H9|ZC3HDC9|ZIP	20	20q13.3
ZNF334		55713	ZNF334	zinc finger protein 334	-	20	20q13.12
ZNF569		148266	ZNF569	zinc finger protein 569	ZAP1|ZNF	19	19q13.12
ZNF587		84914	ZNF587	zinc finger protein 587	ZF6	19	19q13.43
ZNF610		162963	ZNF610	zinc finger protein 610	-	19	19q13.41
ZNF843		283933	ZNF843	zinc finger protein 843	-	16	16p11.2

## Sheet: Cellular component
Analysis: Cellular component
Dataset name: Client proteins of Hsp90-Cdc37
Number of genes in the dataset: 267
Number of genes in the dataset (which are available in Cellular component database) :244
Number of genes in background: 19230
Is analysis quantitative: No
						Corrected p-values
Cellular component	No. of genes in the dataset	No.of genes in the background dataset	Percentage of genes	Fold enrichment	P-value (Hypergeometric test)	Bonferroni method	BH method	Q-value (Storey-Tibshirani method)
Plasma membrane	101	3479	37.8277	2.09103	1.5861e-14	1.2435e-11	4.145e-12	2.55317e-11	ABL1; ACVR1; ACVR1B; ACVR1C; ACVR2B; ADRBK1; AKT1; AKT2; AKT3; ALK; AMHR2; AR; AXL; BMPR1A; BMX; BRAF; BTK; CAMK1G; CAMK2A; CAMK2B; CAMK2D; CAMK2G; CAMKK2; CDK14; CHUK; CSF1R; CSNK1D; CSNK2A1; DAPK1; DDR1; DDR2; EGFR; EPHA1; EPHA2; EPHA4; EPHB1; EPHB6; ERBB2; ERBB3; ERBB4; FES; FGFR1; FGFR3; FLT3; FLT4; FYN; GRK6; GRK7; HCK; IGF1R; IKBKB; INSRR; ITK; KIT; KSR1; LCK; LYN; MAP2K5; MAP3K12; MAP3K7; …
Integral to membrane	12	1702	4.49438	0.508198	0.997901	1	1	1	AXL; BMPR1A; CAMKV; ERBB2; FGFR1; FGFR3; NTRK1; NTRK2; OCA2; RYK; TGFBR2; TNK1;
Calcium- and calmodulin-dependent protein kinase complex	3	4	1.1236	54.0598	1.04793e-05	0.00821579	0.00124389	0.00766193	CAMK2A; CAMK2D; CAMK2G;
Integral to plasma membrane	29	934	10.8614	2.23691	4.48532e-05	0.0351649	0.00439561	0.0270754	ACVR1; ACVR1B; ACVR2B; ALK; AXL; CSF1R; DDR1; DDR2; EPHA1; EPHA2; EPHA4; EPHB1; ERBB3; FGFR1; FGFR3; FLT3; FLT4; INSRR; MERTK; MUSK; NTRK1; NTRK2; NTRK3; PDGFRA; PRKD1; ROR2; RYK; TIE1; TYRO3;
Golgi aparatus	22	897	8.2397	1.76716	0.00716974	1	0.401505	1	CAMK1G; CSNK1D; EGFR; FES; GRK4; LCK; LIMK1; LYN; MAP3K12; MAP4K2; MINK1; NTRK1; PASK; PKMYT1; PRKACA; PRKCE; PRKD1; PSKH1; STK16; STK33; STYK1; ULK1;
cAMP-dependent protein kinase complex	1	4	0.374532	18.1397	0.0543964	1	1	1	PRKACA;
Nucleus	137	5847	51.3109	1.6876	6.04503e-13	4.7393e-10	1.18483e-10	7.29809e-10	ABL1; AKT1; AKT2; AKT3; AR; ARAF; AURKC; BMP2K; BRAF; BTK; CAMK2A; CAMK2D; CAMK2G; CAMK4; CAMKV; CDC25C; CDC7; CDK1; CDK11A; CDK11B; CDK14; CDK19; CDK2; CDK20; CDK4; CDK6; CDK9; CHEK1; CHUK; CLK2; CLK3; CSNK1D; CSNK2A1; DAPK2; DAPK3; DPF1; DYRK1A; DYRK1B; DYRK2; EGFR; EIF2AK2; ELK3; ERBB2; ERBB4; ERN1; FASTK; FER; FES; FGFR1; FGFR3; FRK; FYN; GSG2; GTF2F1; HCK; HIPK4; ICK; IKBKB; IRAK1; IRAK3; IT…
Perinuclear region of cytoplasm	1	119	0.374532	0.611209	0.811565	1	1	1	ABL1;
Actin cytoskeleton	1	132	0.374532	0.551019	0.843071	1	1	1	DAPK1;
Nucleolus	18	1257	6.74157	1.03187	0.481219	1	1	1	ABL1; AURKB; CAMK4; CDK1; CDK2; CDK9; CSNK1D; CSNK2A1; EIF2AK2; ELK3; GTF2F1; MAPK3; NEK11; NLK; NOC4L; NR3C1; TARDBP; VSX2;
Mitochondrion	20	1259	7.49064	1.14464	0.298336	1	1	1	ABL1; ARAF; AURKB; BLK; CDK1; ELK3; FASTK; GRK4; IRAK1; LIMK2; MRPL28; NEK9; NR3C1; PAK7; PINK1; PRKD1; RIPK1; RIPK3; STK11; TAOK3;
Cytosol	63	1178	23.5955	3.85223	5.94132e-21	4.658e-18	2.329e-18	1.43458e-17	ABL1; ADRBK1; AKT1; AKT2; AKT3; BMX; BTK; CAMK2A; CAMK2B; CAMK2D; CAMK2G; CAMKK1; CDC25C; CDK1; CDK2; CDK4; CHUK; CSNK1D; FES; FYN; GSK3A; IKBKB; IRAK1; ITK; JAK1; LCK; LYN; MAP2K5; MAP3K1; MAP3K14; MAP3K7; MAP3K8; MAPK13; MAPK14; MAPK3; MAPT; MAST2; PDPK1; PINK1; PRKAA2; PRKACA; PRKACG; PRKCA; PRKCB; PRKCG; PRKCZ; PRKD1; PTK2; RAF1; RET; RIPK1; RIPK2; RPS6KA1; RPS6KA2; RPS6KA3; RPS6KA6; SIK1; SR…
Ribosome	1	144	0.374532	0.505104	0.867472	1	1	1	EIF2AK2;
Membrane fraction	10	346	3.74532	2.08352	0.0232334	1	0.90085	1	ADRBK1; FGFR1; LRRK2; PKMYT1; PRKACA; PRKCA; PRKCG; PRKCZ; RPS6KA1; STK11;
Cytoplasm	165	5684	61.7978	2.09078	4.77552e-28	3.74401e-25	3.74401e-25	2.30617e-24	ABL1; ACVR2B; ADRBK1; AKT1; AKT2; AKT3; AR; ARAF; BMPR1A; BMX; BRAF; BTK; CAMK2A; CAMK2B; CAMK2D; CAMK2G; CAMK4; CAMKK1; CAMKK2; CAMKV; CDC25C; CDC7; CDK1; CDK11B; CDK14; CDK19; CDK2; CDK4; CDK6; CDK9; CHUK; CLK2; CSNK1D; CSNK2A1; DAPK1; DAPK2; DAPK3; DMPK; DUS3L; DYRK1A; DYRK1B; DYRK2; EGFR; EIF2AK1; ELK3; ERBB2; ERBB4; FER; FES; FGFR1; FGFR3; FGR; FLT4; FYN; GRK6; GSK3A; GTF2F1; HCK; IKBKB; IRA…
Exosomes	26	2043	9.73783	0.9169	0.710811	1	1	1	ALK; CAMK4; CDK1; DDR1; EGFR; EPHA2; EPHB1; ERBB2; FGR; FRK; GRK4; LCK; LRRK2; MAP4K4; MINK1; PKN2; PRKCA; PRKCB; PRKCH; PRKCZ; SLK; SRC; STK11; TSSK3; TYK2; YES1;
Perinuclear region	6	131	2.24719	3.30386	0.0100072	1	0.490352	1	AKT3; MAP4K4; PRKCA; PTK2B; TNK2; TSSK6;
Midbody	1	19	0.374532	3.82641	0.233393	1	1	1	CDK1;
Lysosome	12	1620	4.49438	0.533921	0.995796	1	1	1	CSF1R; CSNK2A1; DAPK2; EGFR; ERBB2; HCK; LYN; MEF2B; PDGFRB; PRKACA; SLK; YES1;
Endoplasmic reticulum	10	1104	3.74532	0.653	0.946469	1	1	1	ABL1; CAMK1G; ERN1; GRK4; LIMK2; NTRK1; PKMYT1; PRKCA; PRKCE; ULK1;
Endosome	8	303	2.99625	1.90383	0.061564	1	1	1	EGFR; FYN; NRBP1; NTRK1; OCA2; PKN1; RPS6KC1; SGK3;
Cell surface	5	205	1.87266	1.76001	0.157326	1	1	1	ACVR1B; ACVR2B; ALK; IRAK2; KSR1;
Extracellular	21	1825	7.86517	0.829111	0.846093	1	1	1	AR; AXL; BLK; BRAF; EGFR; EPHA1; ERBB2; ERBB3; FES; FGFR3; IKBKB; KIT; LIMK1; MAP3K5; MAPK7; PDGFRA; PKN2; PRKG2; PTK6; TYRO3; VSX2;
Kinetochore	1	90	0.374532	0.808133	0.716717	1	1	1	GTF2F1;
Extracellular region	2	442	0.749064	0.327504	0.985804	1	1	1	ERBB2; FGFR1;
Membrane	4	350	1.49813	0.825118	0.719162	1	1	1	EGFR; IGF1R; PDGFRB; TNK1;
Extracellular space	3	404	1.1236	0.53657	0.921769	1	1	1	EGFR; ERBB3; KIT;
Extracellular matrix	1	120	0.374532	0.606116	0.814198	1	1	1	TGFBR2;
Receptor complex	4	11	1.49813	26.2306	1.11062e-05	0.00870725	0.00124389	0.00766193	ERBB2; RIPK1; TGFBR1; TGFBR2;
Nucleoplasm	25	449	9.3633	4.01153	4.24282e-09	3.32637e-06	6.65274e-07	4.09784e-06	AKT1; CAMK2A; CAMK2B; CAMK2D; CAMK2G; CAMK4; CDC25C; CDC7; CDK1; CDK2; CDK4; CDK9; CHEK1; GTF2F1; MAPK14; MAPK3; MAPK7; PKMYT1; PRKAA2; PTK2B; RPS6KA1; RPS6KA2; RPS6KA3; RPS6KA5; RPS6KA6;
Centrosome	13	656	4.86891	1.4283	0.126911	1	1	1	AURKB; AURKC; CAMK2A; CDK1; CDK6; CSNK1D; GSK3A; LCK; MAP3K11; PRKACA; PSKH1; TTK; ZAP70;
Soluble fraction	3	180	1.1236	1.20426	0.457471	1	1	1	ADRBK1; MAP4K2; MERTK;
Focal adhesion	2	45	0.749064	3.21617	0.129093	1	1	1	PTK2; PTK2B;
Cytoskeleton	5	427	1.87266	0.84499	0.710096	1	1	1	AURKB; CSNK1D; MAPT; MAST2; PTK2;
Intracellular	4	151	1.49813	1.91245	0.158824	1	1	1	CAMKK2; KSR1; PRKCQ; PRKD2;
Microtubule	2	129	0.749064	1.12208	0.536952	1	1	1	CDK1; MAP3K11;
Ruffle	1	24	0.374532	3.02957	0.28521	1	1	1	CDK6;
Caveola	4	24	1.49813	12.0283	0.000310199	0.243196	0.0202664	0.124833	BMPR1A; HCK; SRC; TGFBR2;
Endosome membrane	2	27	0.749064	5.35949	0.0536933	1	1	1	MAP3K7; TBK1;
Condensed nuclear chromosome, centromeric region	1	3	0.374532	24.1661	0.0410801	1	1	1	AURKB;
Centriolar satellite	1	8	0.374532	9.08115	0.105844	1	1	1	RET;
Spindle	1	30	0.374532	2.42386	0.342805	1	1	1	TTK;
Transcription factor complex	2	43	0.749064	3.36572	0.119835	1	1	1	MEF2B; PITX2;
Transcription elongation factor complex	1	11	0.374532	6.60672	0.142591	1	1	1	CDK9;
Late endosome	1	40	0.374532	1.81805	0.428703	1	1	1	PRKCZ;
Mitochondrial outer membrane	1	29	0.374532	2.50741	0.333537	1	1	1	RAF1;
Mitochondrial ribosome	1	13	0.374532	5.59108	0.16625	1	1	1	MRPL28;
Synaptic vesicle	1	24	0.374532	3.02957	0.28521	1	1	1	CAMKV;
Microsome	2	156	0.749064	0.927888	0.640258	1	1	1	IGF1R; PRKCZ;
Microtubule cytoskeleton	2	47	0.749064	3.07934	0.138511	1	1	1	AKT1; MAPK3;
Intracellular membrane-bounded organelle	6	127	2.24719	3.40791	0.00866223	1	0.452746	1	CDK9; CHUK; ELK3; ICK; LYN; MAP4K2;
Cell junction	1	38	0.374532	1.91371	0.412469	1	1	1	PRKCZ;
Beta-catenin destruction complex	1	6	0.374532	12.1032	0.0804787	1	1	1	GSK3A;
Mitochondrial matrix	1	79	0.374532	0.920643	0.669394	1	1	1	NR3C1;
Membrane raft	3	36	1.1236	6.01998	0.0134807	1	0.572921	1	BTK; LCK; LYN;
Autophagic vacuole	1	6	0.374532	12.1032	0.0804787	1	1	1	ULK1;
Axon	2	27	0.749064	5.35949	0.0536933	1	1	1	MAPT; PTK2;
Golgi membrane	1	55	0.374532	1.32231	0.537029	1	1	1	MAP4K2;
External side of plasma membrane	1	35	0.374532	2.07769	0.387252	1	1	1	TGFBR2;
Clathrin-coated vesicle	1	19	0.374532	3.82641	0.233393	1	1	1	EGFR;
Endomembrane system	1	5	0.374532	14.519	0.0675284	1	1	1	NRBP1;
Basolateral plasma membrane	4	40	1.49813	7.21818	0.00224195	1	0.135207	0.832823	EGFR; ERBB2; ERBB3; ERBB4;
Integral to endoplasmic reticulum membrane	1	31	0.374532	2.3457	0.351944	1	1	1	ERN1;
Early endosome	1	69	0.374532	1.05405	0.619576	1	1	1	RPS6KC1;
Spindle microtubule	1	24	0.374532	3.02957	0.28521	1	1	1	CDK1;
Cytoplasmic vesicle	1	160	0.374532	0.454597	0.894227	1	1	1	FGFR3;
Sin3 complex	1	7	0.374532	10.3766	0.0932498	1	1	1	CSNK2A1;
Interleukin-1 receptor complex	1	3	0.374532	24.1661	0.0410801	1	1	1	IRAK1;
Cyclin-dependent protein kinase holoenzyme complex	3	7	1.1236	30.9243	8.88939e-05	0.0696929	0.00774365	0.047698	CDK2; CDK4; CDK6;
T cell receptor complex	1	12	0.374532	6.05662	0.154503	1	1	1	ZAP70;
Endocytic vesicle membrane	4	22	1.49813	13.1213	0.000218256	0.171113	0.0155557	0.0958176	CAMK2A; CAMK2B; CAMK2D; CAMK2G;
Chromosome	2	59	0.749064	2.45314	0.197547	1	1	1	AURKB; MAPK3;
IkappaB kinase complex	1	8	0.374532	9.08115	0.105844	1	1	1	MAP3K7;
Microtubule associated complex	1	24	0.374532	3.02957	0.28521	1	1	1	MAPT;
Condensed nuclear chromosome	1	12	0.374532	6.05662	0.154503	1	1	1	CHEK1;
Others	1	51	0.374532	1.426	0.510323	1	1	1	FES;
Cytoplasmic cyclin-dependent protein kinase holoenzyme complex	1	2	0.374532	36.1891	0.027577	1	0.90085	1	CDK14;
AP-2 adaptor complex	1	6	0.374532	12.1032	0.0804787	1	1	1	EGFR;
Synapse	1	33	0.374532	2.20357	0.369844	1	1	1	PRKCA;
Growth cone	1	8	0.374532	9.08115	0.105844	1	1	1	MAPT;
Pericentriolar material	1	5	0.374532	14.519	0.0675284	1	1	1	LCK;
NuRD complex	1	12	0.374532	6.05662	0.154503	1	1	1	CSNK2A1;
Phosphorylase kinase complex	1	2	0.374532	36.1891	0.027577	1	0.90085	1	PHKG2;
Chromosome passenger complex	1	3	0.374532	24.1661	0.0410801	1	1	1	AURKB;
Chromosome, telomeric region	1	17	0.374532	4.27631	0.211633	1	1	1	CHEK1;
Sarcoplasmic reticulum	1	32	0.374532	2.27242	0.360956	1	1	1	DMPK;
Tubulin complex	1	2	0.374532	36.1891	0.027577	1	0.90085	1	MAPT;
MLL5-L complex	1	8	0.374532	9.08115	0.105844	1	1	1	STK38;
External side of mitochondrial outer membrane	1	1	0.374532	72.0198	0.0138846	1	0.572921	1	LRRK2;
Activin receptor complex	2	2	0.749064	72.0198	0.000192069	0.150582	0.0150582	0.092753	ACVR1; ACVR1C;
Acrosome	1	11	0.374532	6.60672	0.142591	1	1	1	TSSK6;
Cell projection	1	41	0.374532	1.77371	0.436652	1	1	1	ABL1;
Transcription factor TFIIF complex	1	1	0.374532	72.0198	0.0138846	1	0.572921	1	GTF2F1;
Death-inducing signaling complex	1	4	0.374532	18.1397	0.0543964	1	1	1	RIPK1;
Vesicle (None)	1	13	0.374532	5.59108	0.16625	1	1	1	TNK2;
ULK1-ATG13-FIP200 complex	1	3	0.374532	24.1661	0.0410801	1	1	1	ULK1;
Perinuclear vesicle (None)	1	5	0.374532	14.519	0.0675284	1	1	1	FGFR3;
Condensed chromosome, centromeric region	1	3	0.374532	24.1661	0.0410801	1	1	1	AURKB;
Plasma membrane part	1	2	0.374532	36.1891	0.027577	1	0.90085	1	TGFBR1;

## Sheet: Molecular function
Analysis: Molecular function
Dataset name: Client proteins of Hsp90-Cdc37
Number of genes in the dataset: 267
Number of genes in the dataset (which are available in Molecular function database) :263
Number of genes in background: 19230
Is analysis quantitative: No
						Corrected p-values
Molecular function	No. of genes in the dataset	No.of genes in the background dataset	Percentage of genes	Fold enrichment	P-value (Hypergeometric test)	Bonferroni method	BH method	Q-value (Storey-Tibshirani method)
Molecular function unknown	4	5685	1.49813	0.0508002	1	1	1	1	CAMKV; EPHA10; LRRK2; NOC4L;
Transporter activity	1	576	0.374532	0.126283	0.999719	1	1	1	OCA2;
Protein-tyrosine kinase activity	26	38	9.73783	49.2827	3.43595e-40	7.69653e-38	2.56551e-38	1.65794e-37	ABL1; BLK; BMX; BTK; DYRK2; FER; FES; FGR; FRK; FYN; HCK; ITK; JAK1; LCK; LYN; MATK; PTK2; PTK2B; PTK6; SRC; TNK1; TNK2; TNNI3K; TYK2; YES1; ZAP70;
Catalytic activity	2	532	0.749064	0.2721	0.995391	1	1	1	EIF2AK1; TESK2;
Structural molecule activity	2	269	0.749064	0.538121	0.890351	1	1	1	MAPT; MRPL28;
Receptor signaling protein serine/threonine kinase activity	9	14	3.37079	46.3168	3.15856e-14	7.07517e-12	1.41503e-12	9.14456e-12	ACVR1; ACVR1B; ACVR1C; ACVR2B; AMHR2; BMPR1A; GRK7; TGFBR1; TGFBR2;
Protein serine/threonine kinase activity	143	301	53.5581	34.2166	4.38388e-198	9.81989e-196	9.81989e-196	6.34604e-195	ADRBK1; AKT1; AKT2; AKT3; ARAF; AURKB; AURKC; BMP2K; BRAF; CAMK1G; CAMK2A; CAMK2B; CAMK2D; CAMK2G; CAMK4; CAMKK1; CDC7; CDK1; CDK10; CDK11B; CDK14; CDK15; CDK17; CDK18; CDK19; CDK20; CDK9; CDKL4; CHEK1; CHUK; CSNK1D; CSNK2A1; DAPK1; DAPK2; DAPK3; DCLK2; DMPK; DYRK1A; DYRK4; EIF2AK2; ERN1; FASTK; GRK4; GRK6; GSG2; GSK3A; HIPK4; ICK; IKBKB; IRAK1; IRAK2; IRAK3; LIMK1; LIMK2; MAP2K6; MAP3K11; MAP3K1…
Transcription regulator activity	5	832	1.87266	0.433672	0.991111	1	1	1	RPS6KA4; ZBTB40; ZNF334; ZNF569; ZNF587;
Ligand-dependent nuclear receptor activity	2	35	0.749064	4.13481	0.0847457	1	1	1	AR; NR3C1;
Transcription factor activity	5	842	1.87266	0.428521	0.991964	1	1	1	ELK3; GTF2F1; LMX1B; PITX2; VSX2;
Receptor signaling complex scaffold activity	1	322	0.374532	0.225894	0.989331	1	1	1	NRBP1;
Transmembrane receptor protein tyrosine kinase activity	33	56	12.3596	42.4455	1.58956e-47	3.56061e-45	1.78031e-45	1.15051e-44	ALK; AXL; CSF1R; DDR1; DDR2; EGFR; EPHA1; EPHA2; EPHA4; EPHB1; EPHB6; ERBB2; ERBB3; ERBB4; FGFR1; FGFR3; FLT3; FLT4; IGF1R; INSRR; KIT; MERTK; MUSK; NTRK1; NTRK2; NTRK3; PDGFRA; PDGFRB; RET; ROR2; RYK; TIE1; TYRO3;
Growth factor activity	1	110	0.374532	0.661213	0.786135	1	1	1	ULK2;
Binding	1	22	0.374532	3.30486	0.264916	1	1	1	FGFR3;
Protein binding	1	182	0.374532	0.399648	0.92245	1	1	1	CDK6;
RNA binding	3	366	1.1236	0.592278	0.886132	1	1	1	TUT1; UHMK1; ZGPAT;
DNA binding	5	654	1.87266	0.551703	0.95158	1	1	1	DPF1; DUS3L; TARDBP; ZNF334; ZNF610;
Protein tyrosine/serine/threonine phosphatase activity	1	37	0.374532	1.96542	0.40418	1	1	1	CDC25C;
Kinase activity	4	14	1.49813	20.6138	3.25985e-05	0.00730206	0.00121701	0.00786484	CDK2; CDK4; KSR1; NEK9;
Guanyl-nucleotide exchange factor activity	1	112	0.374532	0.649406	0.792066	1	1	1	VAV3;
Protein threonine/tyrosine kinase activity	12	28	4.49438	30.8803	1.00118e-15	2.24264e-13	5.60661e-14	3.62323e-13	CLK2; CLK3; DSTYK; DYRK1B; KSR2; MAP2K7; MAP3K8; MOS; PKMYT1; STYK1; TESK1; TTK;
Ribonucleoprotein	1	41	0.374532	1.77371	0.436652	1	1	1	MRPL28;
Phosphorylase activity	2	20	0.749064	7.23437	0.0309564	1	0.866781	1	CAMKK2; PHKG2;
Guanylate cyclase activity	1	8	0.374532	9.08115	0.105844	1	1	1	NPR2;
Protein kinase activity	1	3	0.374532	24.1661	0.0410801	1	1	1	MAP2K5;
Receptor signaling protein tyrosine kinase activity	1	2	0.374532	36.1891	0.027577	1	0.866781	1	EPHA10;

## Sheet: Biological process
Analysis: Biological process
Dataset name: Client proteins of Hsp90-Cdc37
Number of genes in the dataset: 267
Number of genes in the dataset (which are available in Biological process database) :263
Number of genes in background: 19230
Is analysis quantitative: No
						Corrected p-values
Biological process	No. of genes in the dataset	No.of genes in the background dataset	Percentage of genes	Fold enrichment	P-value (Hypergeometric test)	Bonferroni method	BH method	Q-value (Storey-Tibshirani method)
Biological_process unknown	4	4731	1.49813	0.0610439	1	1	1	1	CAMKV; FGFR3; LRRK2; NOC4L;
Protein metabolism	2	1323	0.749064	0.109417	1	1	1	1	MRPL28; TSSK2;
Metabolism	4	1683	1.49813	0.171597	1	1	1	1	CDKL4; EIF2AK1; PHKG2; PINK1;
Energy pathways	4	1633	1.49813	0.176851	1	1	1	1	CDKL4; EIF2AK1; PHKG2; PINK1;
Cell growth and/or maintenance	3	1125	1.1236	0.192691	0.999986	1	1	1	CDK20; MAPT; NEK9;
Transport	1	1215	0.374532	0.0598678	1	1	1	1	OCA2;
Cell communication	192	3713	71.9101	3.72434	1.12313e-78	1.99917e-76	9.99586e-77	5.94249e-76	ABL1; ACVR1; ACVR1B; ACVR1C; ACVR2B; ADRBK1; AKT1; AKT2; AKT3; ALK; AMHR2; AR; ARAF; AURKB; AXL; BMP2K; BMPR1A; BMX; BRAF; BTK; CAMK1G; CAMK2A; CAMK2B; CAMK2G; CAMK4; CAMKK1; CDC25C; CDC7; CDK1; CDK11B; CDK14; CDK15; CDK17; CDK18; CDK19; CDK4; CDK6; CHEK1; CHUK; CLK2; CLK3; CSF1R; CSNK1D; DAPK1; DAPK3; DCLK2; DDR1; DMPK; DYRK1A; DYRK1B; DYRK2; DYRK4; EGFR; EIF2AK2; EPHA1; EPHA10; EPHA2; EPHA4; EP…
Signal transduction	214	3934	80.1498	3.91788	1.13448e-98	2.01937e-96	2.01937e-96	1.20051e-95	ABL1; ACVR1; ACVR1B; ACVR1C; ACVR2B; ADRBK1; AKT1; AKT2; AKT3; ALK; AMHR2; AR; ARAF; AURKB; AXL; BMP2K; BMPR1A; BMX; BRAF; BTK; CAMK1G; CAMK2A; CAMK2B; CAMK2G; CAMK4; CAMKK1; CDC25C; CDC7; CDK1; CDK11B; CDK14; CDK15; CDK17; CDK18; CDK19; CDK4; CDK6; CHEK1; CHUK; CLK2; CLK3; CSF1R; CSNK1D; CSNK2A1; DAPK1; DAPK3; DCLK2; DDR1; DMPK; DYRK1A; DYRK1B; DYRK2; DYRK4; EGFR; EIF2AK2; EPHA1; EPHA10; EPHA2; …
Regulation of nucleobase, nucleoside, nucleotide and nucleic acid metabolism	20	2828	7.49064	0.509587	0.999903	1	1	1	CDK2; CDK9; DPF1; DUS3L; ELK3; GTF2F1; HIPK4; LMX1B; NR3C1; RPS6KA4; TARDBP; TUT1; UHMK1; VSX2; ZBTB40; ZGPAT; ZNF334; ZNF569; ZNF587; ZNF610;
RNA metabolism	1	26	0.374532	2.79662	0.304946	1	1	1	MRPL28;
Regulation of cell cycle	2	57	0.749064	2.5392	0.187475	1	1	1	CDK10; MAP2K6;
Regulation of blood pressure	1	3	0.374532	24.1661	0.0410801	1	0.664751	1	NPR2;
Regulation of cell proliferation	2	23	0.749064	6.29117	0.0401193	1	0.664751	1	MAPK7; TGFBR2;
Immune response	1	576	0.374532	0.126283	0.999719	1	1	1	ZAP70;
Anti-apoptosis	2	32	0.749064	4.52233	0.0725565	1	0.861004	1	KSR1; PRKCZ;
Cell cycle	2	22	0.749064	6.577	0.0369626	1	0.664751	1	AURKC; NEK11;
Apoptosis	7	220	2.62172	2.29471	0.034361	1	0.664751	1	BLK; DAPK2; DSTYK; FASTK; MAPK7; RIPK3; TESK2;
Regulation of immune response	1	8	0.374532	9.08115	0.105844	1	1	1	TGFBR2;
Regulation of cell growth	1	21	0.374532	3.46216	0.254554	1	1	1	CAMK2D;
Negative regulation of enzyme activity	2	3	0.749064	48.093	0.000570912	0.101622	0.0254056	0.151035	PKMYT1; PRKCZ;
Cytokine and chemokine mediated signaling pathway	1	4	0.374532	18.1397	0.0543964	1	0.806879	1	RPS6KA5;
Cell differentiation	1	29	0.374532	2.50741	0.333537	1	1	1	TSSK6;
Protein modification	1	20	0.374532	3.63518	0.244047	1	1	1	CSNK2A1;
Organogenesis	1	9	0.374532	8.07325	0.118264	1	1	1	PITX2;
Regulation of signal transduction	1	24	0.374532	3.02957	0.28521	1	1	1	KSR1;
Enzyme linked receptor protein signaling pathway	1	1	0.374532	72.0198	0.0138846	1	0.49429	1	FGFR3;
Cellular morphogenesis during differentiation	1	3	0.374532	24.1661	0.0410801	1	0.664751	1	FGFR3;
Regulation of translation	1	13	0.374532	5.59108	0.16625	1	1	1	RPS6KA5;
Inflammatory response	1	14	0.374532	5.19201	0.177834	1	1	1	PRKCZ;
Transcription	2	46	0.749064	3.14627	0.133783	1	1	1	PSKH1; RPS6KA5;
Regulation of enzyme activity	1	5	0.374532	14.519	0.0675284	1	0.858575	1	CAMKK2;
CGMP-mediated signaling	1	2	0.374532	36.1891	0.027577	1	0.664751	1	NPR2;
Transmembrane receptor protein tyrosine kinase signaling pathway	2	2	0.749064	72.0198	0.000192069	0.0341883	0.0113961	0.0677492	DDR2; NTRK1;
Calcium-mediated signaling	1	9	0.374532	8.07325	0.118264	1	1	1	CAMKK2;
Protein targeting	1	5	0.374532	14.519	0.0675284	1	0.858575	1	PSKH1;

## Sheet: Biological pathway
Analysis: Biological pathway
Dataset name: Client proteins of Hsp90-Cdc37
Number of genes in the dataset: 267
Number of genes in the dataset (which are available in Biological pathway database) :168
Number of genes in background: 19230
Is analysis quantitative: No
Biological pathway	No. of genes in the dataset	No.of genes in the background dataset	Percentage of genes	Fold enrichment	P-value (Hypergeometric test)	Bonferroni method	BH method	Q-value (Storey-Tibshirani method)
Glypican pathway	102	1335	38.2022	5.50314	2.00517e-49	3.34462e-46	8.87399e-47	3.91629e-46	ABL1; AKT1; AKT2; AKT3; AR; BLK; BMPR1A; BMX; BRAF; BTK; CAMK2A; CAMK2B; CAMK2G; CAMK4; CDK1; CDK11B; CDK2; CDK4; CDK6; CHEK1; CHUK; CSF1R; CSNK1D; CSNK2A1; DYRK2; EGFR; EIF2AK2; EPHA2; ERBB2; FES; FGFR1; FGFR3; FGR; FYN; GSK3A; HCK; IGF1R; IKBKB; ITK; JAK1; KSR1; LCK; LYN; MAP2K5; MAP2K6; MAP2K7; MAP3K1; MAP3K12; MAP3K14; MAP3K2; MAP3K3; MAP3K5; MAP3K6; MAP3K7; MAP3K8; MAP4K1; MAP4K4; MAPK13; MA…
IFN-gamma pathway	102	1293	38.2022	5.68189	9.89688e-51	1.6508e-47	1.6508e-47	7.28534e-47	ABL1; AKT1; AKT2; AKT3; AR; BLK; BMPR1A; BMX; BRAF; BTK; CAMK2A; CAMK2B; CAMK2D; CAMK2G; CAMK4; CDK1; CDK11B; CDK2; CDK4; CDK6; CHEK1; CHUK; CSF1R; CSNK1D; CSNK2A1; DAPK1; DYRK2; EGFR; EIF2AK2; EPHA2; ERBB2; FES; FGFR1; FGFR3; FGR; FYN; GSK3A; HCK; IGF1R; IKBKB; ITK; JAK1; KSR1; LCK; LYN; MAP2K5; MAP2K6; MAP2K7; MAP3K1; MAP3K11; MAP3K12; MAP3K14; MAP3K2; MAP3K3; MAP3K5; MAP3K6; MAP3K7; MAP3K8; MA…
TRAIL signaling pathway	101	1325	37.8277	5.49031	8.83214e-49	1.4732e-45	1.8415e-46	8.12695e-46	ABL1; AKT1; AKT2; AKT3; AR; BLK; BMPR1A; BMX; BRAF; BTK; CAMK2A; CAMK2B; CAMK2G; CAMK4; CDK1; CDK11B; CDK2; CDK4; CDK6; CHEK1; CHUK; CSF1R; CSNK1D; CSNK2A1; DYRK2; EGFR; EIF2AK2; EPHA2; ERBB2; FES; FGFR1; FGFR3; FGR; FYN; GSK3A; HCK; IGF1R; IKBKB; ITK; JAK1; KSR1; LCK; LIMK1; LYN; MAP2K5; MAP2K6; MAP2K7; MAP3K1; MAP3K12; MAP3K14; MAP3K2; MAP3K3; MAP3K5; MAP3K6; MAP3K7; MAP3K8; MAP4K1; MAP4K4; MAP…
ErbB receptor signaling network	101	1308	37.8277	5.56167	2.66007e-49	4.437e-46	8.87399e-47	3.91629e-46	ABL1; AKT1; AKT2; AKT3; AR; BLK; BMPR1A; BMX; BRAF; BTK; CAMK2A; CAMK2B; CAMK2G; CAMK4; CDK1; CDK11B; CDK2; CDK4; CDK6; CHEK1; CHUK; CSF1R; CSNK1D; CSNK2A1; DYRK2; EGFR; EIF2AK2; EPHA2; ERBB2; ERBB3; ERBB4; FES; FGFR1; FGFR3; FGR; FYN; GSK3A; HCK; IGF1R; IKBKB; ITK; JAK1; KSR1; LCK; LYN; MAP2K5; MAP2K6; MAP2K7; MAP3K1; MAP3K12; MAP3K14; MAP3K2; MAP3K3; MAP3K5; MAP3K6; MAP3K7; MAP3K8; MAP4K1; MAP4…
VEGF and VEGFR signaling network	101	1301	37.8277	5.5916	1.61419e-49	2.69247e-46	8.87399e-47	3.91629e-46	ABL1; AKT1; AKT2; AKT3; AR; BLK; BMPR1A; BMX; BRAF; BTK; CAMK2A; CAMK2B; CAMK2G; CAMK4; CAMKK2; CDK1; CDK11B; CDK2; CDK4; CDK6; CHEK1; CHUK; CSF1R; CSNK1D; CSNK2A1; DYRK2; EGFR; EIF2AK2; EPHA2; ERBB2; FES; FGFR1; FGFR3; FGR; FLT4; FYN; GSK3A; HCK; IGF1R; IKBKB; ITK; JAK1; KSR1; LCK; LYN; MAP2K5; MAP2K6; MAP2K7; MAP3K1; MAP3K12; MAP3K14; MAP3K2; MAP3K3; MAP3K5; MAP3K6; MAP3K7; MAP3K8; MAP4K1; MAP4…
Proteoglycan syndecan-mediated signaling events	101	1342	37.8277	5.42077	2.87982e-48	4.80354e-45	2.87693e-46	1.26965e-45	ABL1; AKT1; AKT2; AKT3; AR; BLK; BMPR1A; BMX; BRAF; BTK; CAMK2A; CAMK2B; CAMK2G; CAMK4; CDK1; CDK11B; CDK2; CDK4; CDK6; CHEK1; CHUK; CSF1R; CSNK1D; CSNK2A1; DYRK2; EGFR; EIF2AK2; EPHA2; ERBB2; FES; FGFR1; FGFR3; FGR; FYN; GSK3A; HCK; IGF1R; IKBKB; ITK; JAK1; KSR1; LCK; LYN; MAP2K5; MAP2K6; MAP2K7; MAP3K1; MAP3K12; MAP3K14; MAP3K2; MAP3K3; MAP3K5; MAP3K6; MAP3K7; MAP3K8; MAP4K1; MAP4K4; MAPK13; MA…
LKB1 signaling events	101	1305	37.8277	5.57446	2.14827e-49	3.58331e-46	8.87399e-47	3.91629e-46	ABL1; AKT1; AKT2; AKT3; AR; BLK; BMPR1A; BMX; BRAF; BTK; CAMK2A; CAMK2B; CAMK2G; CAMK4; CDK1; CDK11B; CDK2; CDK4; CDK6; CHEK1; CHUK; CSF1R; CSNK1D; CSNK2A1; DYRK2; EGFR; EIF2AK2; EPHA2; ERBB2; FES; FGFR1; FGFR3; FGR; FYN; GSK3A; HCK; IGF1R; IKBKB; ITK; JAK1; KSR1; LCK; LYN; MAP2K5; MAP2K6; MAP2K7; MAP3K1; MAP3K12; MAP3K14; MAP3K2; MAP3K3; MAP3K5; MAP3K6; MAP3K7; MAP3K8; MAP4K1; MAP4K4; MAPK13; MA…
IGF1 pathway	100	1288	37.4532	5.59212	5.73975e-49	9.5739e-46	1.59565e-46	7.04195e-46	ABL1; AKT1; AKT2; AKT3; AR; BLK; BMPR1A; BMX; BRAF; BTK; CAMK2A; CAMK2B; CAMK2G; CAMK4; CDK1; CDK11B; CDK2; CDK4; CDK6; CHEK1; CHUK; CSF1R; CSNK1D; CSNK2A1; DYRK2; EGFR; EIF2AK2; EPHA2; ERBB2; FES; FGFR1; FGFR3; FGR; FYN; GSK3A; HCK; IGF1R; IKBKB; ITK; JAK1; KSR1; LCK; LYN; MAP2K5; MAP2K6; MAP2K7; MAP3K1; MAP3K12; MAP3K14; MAP3K2; MAP3K3; MAP3K5; MAP3K6; MAP3K7; MAP3K8; MAP4K1; MAP4K4; MAPK13; MA…
Signaling events mediated by VEGFR1 and VEGFR2	100	1293	37.4532	5.57049	8.20159e-49	1.36803e-45	1.8415e-46	8.12695e-46	ABL1; AKT1; AKT2; AKT3; AR; BLK; BMPR1A; BMX; BRAF; BTK; CAMK2A; CAMK2B; CAMK2G; CAMK4; CAMKK2; CDK1; CDK11B; CDK2; CDK4; CDK6; CHEK1; CHUK; CSF1R; CSNK1D; CSNK2A1; DYRK2; EGFR; EIF2AK2; EPHA2; ERBB2; FES; FGFR1; FGFR3; FGR; FYN; GSK3A; HCK; IGF1R; IKBKB; ITK; JAK1; KSR1; LCK; LYN; MAP2K5; MAP2K6; MAP2K7; MAP3K1; MAP3K12; MAP3K14; MAP3K2; MAP3K3; MAP3K5; MAP3K6; MAP3K7; MAP3K8; MAP4K1; MAP4K4; MA…
Plasma membrane estrogen receptor signaling	100	1298	37.4532	5.54903	1.17002e-48	1.9516e-45	2.16844e-46	9.56982e-46	ABL1; AKT1; AKT2; AKT3; AR; BLK; BMPR1A; BMX; BRAF; BTK; CAMK2A; CAMK2B; CAMK2G; CAMK4; CDK1; CDK11B; CDK2; CDK4; CDK6; CHEK1; CHUK; CSF1R; CSNK1D; CSNK2A1; DYRK2; EGFR; EIF2AK2; EPHA2; ERBB2; FES; FGFR1; FGFR3; FGR; FYN; GSK3A; HCK; IGF1R; IKBKB; ITK; JAK1; KSR1; LCK; LYN; MAP2K5; MAP2K6; MAP2K7; MAP3K1; MAP3K12; MAP3K14; MAP3K2; MAP3K3; MAP3K5; MAP3K6; MAP3K7; MAP3K8; MAP4K1; MAP4K4; MAPK13; MA…
Syndecan-1-mediated signaling events	99	1297	37.0787	5.49778	9.64128e-48	1.60817e-44	4.59476e-46	2.02777e-45	ABL1; AKT1; AKT2; AKT3; AR; BLK; BMPR1A; BMX; BRAF; BTK; CAMK2A; CAMK2B; CAMK2G; CAMK4; CDK1; CDK11B; CDK2; CDK4; CDK6; CHEK1; CHUK; CSF1R; CSNK1D; CSNK2A1; DYRK2; EGFR; EIF2AK2; EPHA2; ERBB2; FES; FGFR1; FGFR3; FGR; FYN; GSK3A; HCK; IGF1R; IKBKB; ITK; JAK1; KSR1; LCK; LYN; MAP2K5; MAP2K6; MAP2K7; MAP3K1; MAP3K12; MAP3K14; MAP3K2; MAP3K3; MAP3K5; MAP3K6; MAP3K7; MAP3K8; MAP4K1; MAP4K4; MAPK13; MA…
GMCSF-mediated signaling events	99	1289	37.0787	5.53191	5.49278e-48	9.16195e-45	3.39025e-46	1.49619e-45	ABL1; AKT1; AKT2; AKT3; AR; BLK; BMPR1A; BMX; BRAF; BTK; CAMK2A; CAMK2B; CAMK2G; CAMK4; CDK1; CDK11B; CDK2; CDK4; CDK6; CHEK1; CHUK; CSF1R; CSNK1D; CSNK2A1; DYRK2; EGFR; EIF2AK2; EPHA2; ERBB2; FES; FGFR1; FGFR3; FGR; FYN; GSK3A; HCK; IGF1R; IKBKB; ITK; JAK1; KSR1; LCK; LYN; MAP2K5; MAP2K6; MAP2K7; MAP3K1; MAP3K12; MAP3K14; MAP3K2; MAP3K3; MAP3K5; MAP3K6; MAP3K7; MAP3K8; MAP4K1; MAP4K4; MAPK13; MA…
Insulin Pathway	99	1285	37.0787	5.54913	4.13947e-48	6.90463e-45	2.87693e-46	1.26965e-45	ABL1; AKT1; AKT2; AKT3; AR; BLK; BMPR1A; BMX; BRAF; BTK; CAMK2A; CAMK2B; CAMK2G; CAMK4; CDK1; CDK11B; CDK2; CDK4; CDK6; CHEK1; CHUK; CSF1R; CSNK1D; CSNK2A1; DYRK2; EGFR; EIF2AK2; EPHA2; ERBB2; FES; FGFR1; FGFR3; FGR; FYN; GSK3A; HCK; IGF1R; IKBKB; ITK; JAK1; KSR1; LCK; LYN; MAP2K5; MAP2K6; MAP2K7; MAP3K1; MAP3K12; MAP3K14; MAP3K2; MAP3K3; MAP3K5; MAP3K6; MAP3K7; MAP3K8; MAP4K1; MAP4K4; MAPK13; MA…
Nectin adhesion pathway	99	1292	37.0787	5.51906	6.78627e-48	1.13195e-44	3.65145e-46	1.61146e-45	ABL1; AKT1; AKT2; AKT3; AR; BLK; BMPR1A; BMX; BRAF; BTK; CAMK2A; CAMK2B; CAMK2G; CAMK4; CDK1; CDK11B; CDK2; CDK4; CDK6; CHEK1; CHUK; CSF1R; CSNK1D; CSNK2A1; DYRK2; EGFR; EIF2AK2; EPHA2; ERBB2; FES; FGFR1; FGFR3; FGR; FYN; GSK3A; HCK; IGF1R; IKBKB; ITK; JAK1; KSR1; LCK; LYN; MAP2K5; MAP2K6; MAP2K7; MAP3K1; MAP3K12; MAP3K14; MAP3K2; MAP3K3; MAP3K5; MAP3K6; MAP3K7; MAP3K8; MAP4K1; MAP4K4; MAPK13; MA…
Signaling events mediated by Hepatocyte Growth Factor Receptor (c-Met)	99	1290	37.0787	5.52762	5.89431e-48	9.83171e-45	3.39025e-46	1.49619e-45	ABL1; AKT1; AKT2; AKT3; AR; BLK; BMPR1A; BMX; BRAF; BTK; CAMK2A; CAMK2B; CAMK2G; CAMK4; CDK1; CDK11B; CDK2; CDK4; CDK6; CHEK1; CHUK; CSF1R; CSNK1D; CSNK2A1; DYRK2; EGFR; EIF2AK2; EPHA2; ERBB2; FES; FGFR1; FGFR3; FGR; FYN; GSK3A; HCK; IGF1R; IKBKB; ITK; JAK1; KSR1; LCK; LYN; MAP2K5; MAP2K6; MAP2K7; MAP3K1; MAP3K12; MAP3K14; MAP3K2; MAP3K3; MAP3K5; MAP3K6; MAP3K7; MAP3K8; MAP4K1; MAP4K4; MAPK13; MA…
Glypican 1 network	99	1296	37.0787	5.50203	8.98856e-48	1.49929e-44	4.54331e-46	2.00506e-45	ABL1; AKT1; AKT2; AKT3; AR; BLK; BMPR1A; BMX; BRAF; BTK; CAMK2A; CAMK2B; CAMK2G; CAMK4; CDK1; CDK11B; CDK2; CDK4; CDK6; CHEK1; CHUK; CSF1R; CSNK1D; CSNK2A1; DYRK2; EGFR; EIF2AK2; EPHA2; ERBB2; FES; FGFR1; FGFR3; FGR; FYN; GSK3A; HCK; IGF1R; IKBKB; ITK; JAK1; KSR1; LCK; LYN; MAP2K5; MAP2K6; MAP2K7; MAP3K1; MAP3K12; MAP3K14; MAP3K2; MAP3K3; MAP3K5; MAP3K6; MAP3K7; MAP3K8; MAP4K1; MAP4K4; MAPK13; MA…
PDGF receptor signaling network	99	1290	37.0787	5.52762	5.89431e-48	9.83171e-45	3.39025e-46	1.49619e-45	ABL1; AKT1; AKT2; AKT3; AR; BLK; BMPR1A; BMX; BRAF; BTK; CAMK2A; CAMK2B; CAMK2G; CAMK4; CDK1; CDK11B; CDK2; CDK4; CDK6; CHEK1; CHUK; CSF1R; CSNK1D; CSNK2A1; DYRK2; EGFR; EIF2AK2; EPHA2; ERBB2; FES; FGFR1; FGFR3; FGR; FYN; GSK3A; HCK; IGF1R; IKBKB; ITK; JAK1; KSR1; LCK; LYN; MAP2K5; MAP2K6; MAP2K7; MAP3K1; MAP3K12; MAP3K14; MAP3K2; MAP3K3; MAP3K5; MAP3K6; MAP3K7; MAP3K8; MAP4K1; MAP4K4; MAPK13; MA…
Integrin family cell surface interactions	99	1375	37.0787	5.18591	1.88941e-45	3.15154e-42	7.87884e-44	3.47711e-43	ABL1; AKT1; AKT2; AKT3; AR; BLK; BMPR1A; BMX; BRAF; BTK; CAMK2A; CAMK2B; CAMK2G; CAMK4; CDK1; CDK11B; CDK2; CDK4; CDK6; CHEK1; CHUK; CSF1R; CSNK1D; CSNK2A1; DYRK2; EGFR; EIF2AK2; EPHA2; ERBB2; FES; FGFR1; FGFR3; FGR; FYN; GSK3A; HCK; IGF1R; IKBKB; ITK; JAK1; KSR1; LCK; LYN; MAP2K5; MAP2K6; MAP2K7; MAP3K1; MAP3K12; MAP3K14; MAP3K2; MAP3K3; MAP3K5; MAP3K6; MAP3K7; MAP3K8; MAP4K1; MAP4K4; MAPK13; MA…
Internalization of ErbB1	99	1285	37.0787	5.54913	4.13947e-48	6.90463e-45	2.87693e-46	1.26965e-45	ABL1; AKT1; AKT2; AKT3; AR; BLK; BMPR1A; BMX; BRAF; BTK; CAMK2A; CAMK2B; CAMK2G; CAMK4; CDK1; CDK11B; CDK2; CDK4; CDK6; CHEK1; CHUK; CSF1R; CSNK1D; CSNK2A1; DYRK2; EGFR; EIF2AK2; EPHA2; ERBB2; FES; FGFR1; FGFR3; FGR; FYN; GSK3A; HCK; IGF1R; IKBKB; ITK; JAK1; KSR1; LCK; LYN; MAP2K5; MAP2K6; MAP2K7; MAP3K1; MAP3K12; MAP3K14; MAP3K2; MAP3K3; MAP3K5; MAP3K6; MAP3K7; MAP3K8; MAP4K1; MAP4K4; MAPK13; MA…
Beta1 integrin cell surface interactions	99	1348	37.0787	5.28978	3.16827e-46	5.28467e-43	1.35504e-44	5.98011e-44	ABL1; AKT1; AKT2; AKT3; AR; BLK; BMPR1A; BMX; BRAF; BTK; CAMK2A; CAMK2B; CAMK2G; CAMK4; CDK1; CDK11B; CDK2; CDK4; CDK6; CHEK1; CHUK; CSF1R; CSNK1D; CSNK2A1; DYRK2; EGFR; EIF2AK2; EPHA2; ERBB2; FES; FGFR1; FGFR3; FGR; FYN; GSK3A; HCK; IGF1R; IKBKB; ITK; JAK1; KSR1; LCK; LYN; MAP2K5; MAP2K6; MAP2K7; MAP3K1; MAP3K12; MAP3K14; MAP3K2; MAP3K3; MAP3K5; MAP3K6; MAP3K7; MAP3K8; MAP4K1; MAP4K4; MAPK13; MA…
Urokinase-type plasminogen activator (uPA) and uPAR-mediated signaling	99	1285	37.0787	5.54913	4.13947e-48	6.90463e-45	2.87693e-46	1.26965e-45	ABL1; AKT1; AKT2; AKT3; AR; BLK; BMPR1A; BMX; BRAF; BTK; CAMK2A; CAMK2B; CAMK2G; CAMK4; CDK1; CDK11B; CDK2; CDK4; CDK6; CHEK1; CHUK; CSF1R; CSNK1D; CSNK2A1; DYRK2; EGFR; EIF2AK2; EPHA2; ERBB2; FES; FGFR1; FGFR3; FGR; FYN; GSK3A; HCK; IGF1R; IKBKB; ITK; JAK1; KSR1; LCK; LYN; MAP2K5; MAP2K6; MAP2K7; MAP3K1; MAP3K12; MAP3K14; MAP3K2; MAP3K3; MAP3K5; MAP3K6; MAP3K7; MAP3K8; MAP4K1; MAP4K4; MAPK13; MA…
PAR1-mediated thrombin signaling events	99	1296	37.0787	5.50203	8.98856e-48	1.49929e-44	4.54331e-46	2.00506e-45	ABL1; AKT1; AKT2; AKT3; AR; BLK; BMPR1A; BMX; BRAF; BTK; CAMK2A; CAMK2B; CAMK2G; CAMK4; CDK1; CDK11B; CDK2; CDK4; CDK6; CHEK1; CHUK; CSF1R; CSNK1D; CSNK2A1; DYRK2; EGFR; EIF2AK2; EPHA2; ERBB2; FES; FGFR1; FGFR3; FGR; FYN; GSK3A; HCK; IGF1R; IKBKB; ITK; JAK1; KSR1; LCK; LYN; MAP2K5; MAP2K6; MAP2K7; MAP3K1; MAP3K12; MAP3K14; MAP3K2; MAP3K3; MAP3K5; MAP3K6; MAP3K7; MAP3K8; MAP4K1; MAP4K4; MAPK13; MA…
PDGFR-beta signaling pathway	99	1285	37.0787	5.54913	4.13947e-48	6.90463e-45	2.87693e-46	1.26965e-45	ABL1; AKT1; AKT2; AKT3; AR; BLK; BMPR1A; BMX; BRAF; BTK; CAMK2A; CAMK2B; CAMK2G; CAMK4; CDK1; CDK11B; CDK2; CDK4; CDK6; CHEK1; CHUK; CSF1R; CSNK1D; CSNK2A1; DYRK2; EGFR; EIF2AK2; EPHA2; ERBB2; FES; FGFR1; FGFR3; FGR; FYN; GSK3A; HCK; IGF1R; IKBKB; ITK; JAK1; KSR1; LCK; LYN; MAP2K5; MAP2K6; MAP2K7; MAP3K1; MAP3K12; MAP3K14; MAP3K2; MAP3K3; MAP3K5; MAP3K6; MAP3K7; MAP3K8; MAP4K1; MAP4K4; MAPK13; MA…
EGF receptor (ErbB1) signaling pathway	99	1285	37.0787	5.54913	4.13947e-48	6.90463e-45	2.87693e-46	1.26965e-45	ABL1; AKT1; AKT2; AKT3; AR; BLK; BMPR1A; BMX; BRAF; BTK; CAMK2A; CAMK2B; CAMK2G; CAMK4; CDK1; CDK11B; CDK2; CDK4; CDK6; CHEK1; CHUK; CSF1R; CSNK1D; CSNK2A1; DYRK2; EGFR; EIF2AK2; EPHA2; ERBB2; FES; FGFR1; FGFR3; FGR; FYN; GSK3A; HCK; IGF1R; IKBKB; ITK; JAK1; KSR1; LCK; LYN; MAP2K5; MAP2K6; MAP2K7; MAP3K1; MAP3K12; MAP3K14; MAP3K2; MAP3K3; MAP3K5; MAP3K6; MAP3K7; MAP3K8; MAP4K1; MAP4K4; MAPK13; MA…
Thrombin/protease-activated receptor (PAR) pathway	99	1297	37.0787	5.49778	9.64128e-48	1.60817e-44	4.59476e-46	2.02777e-45	ABL1; AKT1; AKT2; AKT3; AR; BLK; BMPR1A; BMX; BRAF; BTK; CAMK2A; CAMK2B; CAMK2G; CAMK4; CDK1; CDK11B; CDK2; CDK4; CDK6; CHEK1; CHUK; CSF1R; CSNK1D; CSNK2A1; DYRK2; EGFR; EIF2AK2; EPHA2; ERBB2; FES; FGFR1; FGFR3; FGR; FYN; GSK3A; HCK; IGF1R; IKBKB; ITK; JAK1; KSR1; LCK; LYN; MAP2K5; MAP2K6; MAP2K7; MAP3K1; MAP3K12; MAP3K14; MAP3K2; MAP3K3; MAP3K5; MAP3K6; MAP3K7; MAP3K8; MAP4K1; MAP4K4; MAPK13; MA…
Class I PI3K signaling events	99	1285	37.0787	5.54913	4.13947e-48	6.90463e-45	2.87693e-46	1.26965e-45	ABL1; AKT1; AKT2; AKT3; AR; BLK; BMPR1A; BMX; BRAF; BTK; CAMK2A; CAMK2B; CAMK2G; CAMK4; CDK1; CDK11B; CDK2; CDK4; CDK6; CHEK1; CHUK; CSF1R; CSNK1D; CSNK2A1; DYRK2; EGFR; EIF2AK2; EPHA2; ERBB2; FES; FGFR1; FGFR3; FGR; FYN; GSK3A; HCK; IGF1R; IKBKB; ITK; JAK1; KSR1; LCK; LYN; MAP2K5; MAP2K6; MAP2K7; MAP3K1; MAP3K12; MAP3K14; MAP3K2; MAP3K3; MAP3K5; MAP3K6; MAP3K7; MAP3K8; MAP4K1; MAP4K4; MAPK13; MA…
Arf6 signaling events	99	1285	37.0787	5.54913	4.13947e-48	6.90463e-45	2.87693e-46	1.26965e-45	ABL1; AKT1; AKT2; AKT3; AR; BLK; BMPR1A; BMX; BRAF; BTK; CAMK2A; CAMK2B; CAMK2G; CAMK4; CDK1; CDK11B; CDK2; CDK4; CDK6; CHEK1; CHUK; CSF1R; CSNK1D; CSNK2A1; DYRK2; EGFR; EIF2AK2; EPHA2; ERBB2; FES; FGFR1; FGFR3; FGR; FYN; GSK3A; HCK; IGF1R; IKBKB; ITK; JAK1; KSR1; LCK; LYN; MAP2K5; MAP2K6; MAP2K7; MAP3K1; MAP3K12; MAP3K14; MAP3K2; MAP3K3; MAP3K5; MAP3K6; MAP3K7; MAP3K8; MAP4K1; MAP4K4; MAPK13; MA…
IL3-mediated signaling events	99	1292	37.0787	5.51906	6.78627e-48	1.13195e-44	3.65145e-46	1.61146e-45	ABL1; AKT1; AKT2; AKT3; AR; BLK; BMPR1A; BMX; BRAF; BTK; CAMK2A; CAMK2B; CAMK2G; CAMK4; CDK1; CDK11B; CDK2; CDK4; CDK6; CHEK1; CHUK; CSF1R; CSNK1D; CSNK2A1; DYRK2; EGFR; EIF2AK2; EPHA2; ERBB2; FES; FGFR1; FGFR3; FGR; FYN; GSK3A; HCK; IGF1R; IKBKB; ITK; JAK1; KSR1; LCK; LYN; MAP2K5; MAP2K6; MAP2K7; MAP3K1; MAP3K12; MAP3K14; MAP3K2; MAP3K3; MAP3K5; MAP3K6; MAP3K7; MAP3K8; MAP4K1; MAP4K4; MAPK13; MA…
mTOR signaling pathway	99	1285	37.0787	5.54913	4.13947e-48	6.90463e-45	2.87693e-46	1.26965e-45	ABL1; AKT1; AKT2; AKT3; AR; BLK; BMPR1A; BMX; BRAF; BTK; CAMK2A; CAMK2B; CAMK2G; CAMK4; CDK1; CDK11B; CDK2; CDK4; CDK6; CHEK1; CHUK; CSF1R; CSNK1D; CSNK2A1; DYRK2; EGFR; EIF2AK2; EPHA2; ERBB2; FES; FGFR1; FGFR3; FGR; FYN; GSK3A; HCK; IGF1R; IKBKB; ITK; JAK1; KSR1; LCK; LYN; MAP2K5; MAP2K6; MAP2K7; MAP3K1; MAP3K12; MAP3K14; MAP3K2; MAP3K3; MAP3K5; MAP3K6; MAP3K7; MAP3K8; MAP4K1; MAP4K4; MAPK13; MA…
Signaling events mediated by focal adhesion kinase	99	1285	37.0787	5.54913	4.13947e-48	6.90463e-45	2.87693e-46	1.26965e-45	ABL1; AKT1; AKT2; AKT3; AR; BLK; BMPR1A; BMX; BRAF; BTK; CAMK2A; CAMK2B; CAMK2G; CAMK4; CDK1; CDK11B; CDK2; CDK4; CDK6; CHEK1; CHUK; CSF1R; CSNK1D; CSNK2A1; DYRK2; EGFR; EIF2AK2; EPHA2; ERBB2; FES; FGFR1; FGFR3; FGR; FYN; GSK3A; HCK; IGF1R; IKBKB; ITK; JAK1; KSR1; LCK; LYN; MAP2K5; MAP2K6; MAP2K7; MAP3K1; MAP3K12; MAP3K14; MAP3K2; MAP3K3; MAP3K5; MAP3K6; MAP3K7; MAP3K8; MAP4K1; MAP4K4; MAPK13; MA…
Alpha9 beta1 integrin signaling events	99	1302	37.0787	5.47667	1.36755e-47	2.28107e-44	6.3363e-46	2.79635e-45	ABL1; AKT1; AKT2; AKT3; AR; BLK; BMPR1A; BMX; BRAF; BTK; CAMK2A; CAMK2B; CAMK2G; CAMK4; CDK1; CDK11B; CDK2; CDK4; CDK6; CHEK1; CHUK; CSF1R; CSNK1D; CSNK2A1; DYRK2; EGFR; EIF2AK2; EPHA2; ERBB2; FES; FGFR1; FGFR3; FGR; FYN; GSK3A; HCK; IGF1R; IKBKB; ITK; JAK1; KSR1; LCK; LYN; MAP2K5; MAP2K6; MAP2K7; MAP3K1; MAP3K12; MAP3K14; MAP3K2; MAP3K3; MAP3K5; MAP3K6; MAP3K7; MAP3K8; MAP4K1; MAP4K4; MAPK13; MA…
Arf6 downstream pathway	99	1285	37.0787	5.54913	4.13947e-48	6.90463e-45	2.87693e-46	1.26965e-45	ABL1; AKT1; AKT2; AKT3; AR; BLK; BMPR1A; BMX; BRAF; BTK; CAMK2A; CAMK2B; CAMK2G; CAMK4; CDK1; CDK11B; CDK2; CDK4; CDK6; CHEK1; CHUK; CSF1R; CSNK1D; CSNK2A1; DYRK2; EGFR; EIF2AK2; EPHA2; ERBB2; FES; FGFR1; FGFR3; FGR; FYN; GSK3A; HCK; IGF1R; IKBKB; ITK; JAK1; KSR1; LCK; LYN; MAP2K5; MAP2K6; MAP2K7; MAP3K1; MAP3K12; MAP3K14; MAP3K2; MAP3K3; MAP3K5; MAP3K6; MAP3K7; MAP3K8; MAP4K1; MAP4K4; MAPK13; MA…
S1P1 pathway	99	1285	37.0787	5.54913	4.13947e-48	6.90463e-45	2.87693e-46	1.26965e-45	ABL1; AKT1; AKT2; AKT3; AR; BLK; BMPR1A; BMX; BRAF; BTK; CAMK2A; CAMK2B; CAMK2G; CAMK4; CDK1; CDK11B; CDK2; CDK4; CDK6; CHEK1; CHUK; CSF1R; CSNK1D; CSNK2A1; DYRK2; EGFR; EIF2AK2; EPHA2; ERBB2; FES; FGFR1; FGFR3; FGR; FYN; GSK3A; HCK; IGF1R; IKBKB; ITK; JAK1; KSR1; LCK; LYN; MAP2K5; MAP2K6; MAP2K7; MAP3K1; MAP3K12; MAP3K14; MAP3K2; MAP3K3; MAP3K5; MAP3K6; MAP3K7; MAP3K8; MAP4K1; MAP4K4; MAPK13; MA…
ErbB1 downstream signaling	99	1285	37.0787	5.54913	4.13947e-48	6.90463e-45	2.87693e-46	1.26965e-45	ABL1; AKT1; AKT2; AKT3; AR; BLK; BMPR1A; BMX; BRAF; BTK; CAMK2A; CAMK2B; CAMK2G; CAMK4; CDK1; CDK11B; CDK2; CDK4; CDK6; CHEK1; CHUK; CSF1R; CSNK1D; CSNK2A1; DYRK2; EGFR; EIF2AK2; EPHA2; ERBB2; FES; FGFR1; FGFR3; FGR; FYN; GSK3A; HCK; IGF1R; IKBKB; ITK; JAK1; KSR1; LCK; LYN; MAP2K5; MAP2K6; MAP2K7; MAP3K1; MAP3K12; MAP3K14; MAP3K2; MAP3K3; MAP3K5; MAP3K6; MAP3K7; MAP3K8; MAP4K1; MAP4K4; MAPK13; MA…
EGFR-dependent Endothelin signaling events	99	1286	37.0787	5.54481	4.44323e-48	7.41131e-45	2.96452e-46	1.30831e-45	ABL1; AKT1; AKT2; AKT3; AR; BLK; BMPR1A; BMX; BRAF; BTK; CAMK2A; CAMK2B; CAMK2G; CAMK4; CDK1; CDK11B; CDK2; CDK4; CDK6; CHEK1; CHUK; CSF1R; CSNK1D; CSNK2A1; DYRK2; EGFR; EIF2AK2; EPHA2; ERBB2; FES; FGFR1; FGFR3; FGR; FYN; GSK3A; HCK; IGF1R; IKBKB; ITK; JAK1; KSR1; LCK; LYN; MAP2K5; MAP2K6; MAP2K7; MAP3K1; MAP3K12; MAP3K14; MAP3K2; MAP3K3; MAP3K5; MAP3K6; MAP3K7; MAP3K8; MAP4K1; MAP4K4; MAPK13; MA…
Arf6 trafficking events	99	1285	37.0787	5.54913	4.13947e-48	6.90463e-45	2.87693e-46	1.26965e-45	ABL1; AKT1; AKT2; AKT3; AR; BLK; BMPR1A; BMX; BRAF; BTK; CAMK2A; CAMK2B; CAMK2G; CAMK4; CDK1; CDK11B; CDK2; CDK4; CDK6; CHEK1; CHUK; CSF1R; CSNK1D; CSNK2A1; DYRK2; EGFR; EIF2AK2; EPHA2; ERBB2; FES; FGFR1; FGFR3; FGR; FYN; GSK3A; HCK; IGF1R; IKBKB; ITK; JAK1; KSR1; LCK; LYN; MAP2K5; MAP2K6; MAP2K7; MAP3K1; MAP3K12; MAP3K14; MAP3K2; MAP3K3; MAP3K5; MAP3K6; MAP3K7; MAP3K8; MAP4K1; MAP4K4; MAPK13; MA…
Endothelins	99	1304	37.0787	5.46827	1.57207e-47	2.62221e-44	7.08705e-46	3.12767e-45	ABL1; AKT1; AKT2; AKT3; AR; BLK; BMPR1A; BMX; BRAF; BTK; CAMK2A; CAMK2B; CAMK2G; CAMK4; CDK1; CDK11B; CDK2; CDK4; CDK6; CHEK1; CHUK; CSF1R; CSNK1D; CSNK2A1; DYRK2; EGFR; EIF2AK2; EPHA2; ERBB2; FES; FGFR1; FGFR3; FGR; FYN; GSK3A; HCK; IGF1R; IKBKB; ITK; JAK1; KSR1; LCK; LYN; MAP2K5; MAP2K6; MAP2K7; MAP3K1; MAP3K12; MAP3K14; MAP3K2; MAP3K3; MAP3K5; MAP3K6; MAP3K7; MAP3K8; MAP4K1; MAP4K4; MAPK13; MA…
IL5-mediated signaling events	99	1289	37.0787	5.53191	5.49278e-48	9.16195e-45	3.39025e-46	1.49619e-45	ABL1; AKT1; AKT2; AKT3; AR; BLK; BMPR1A; BMX; BRAF; BTK; CAMK2A; CAMK2B; CAMK2G; CAMK4; CDK1; CDK11B; CDK2; CDK4; CDK6; CHEK1; CHUK; CSF1R; CSNK1D; CSNK2A1; DYRK2; EGFR; EIF2AK2; EPHA2; ERBB2; FES; FGFR1; FGFR3; FGR; FYN; GSK3A; HCK; IGF1R; IKBKB; ITK; JAK1; KSR1; LCK; LYN; MAP2K5; MAP2K6; MAP2K7; MAP3K1; MAP3K12; MAP3K14; MAP3K2; MAP3K3; MAP3K5; MAP3K6; MAP3K7; MAP3K8; MAP4K1; MAP4K4; MAPK13; MA…
Sphingosine 1-phosphate (S1P) pathway	99	1308	37.0787	5.45155	2.07586e-47	3.46254e-44	9.11194e-46	4.0213e-45	ABL1; AKT1; AKT2; AKT3; AR; BLK; BMPR1A; BMX; BRAF; BTK; CAMK2A; CAMK2B; CAMK2G; CAMK4; CDK1; CDK11B; CDK2; CDK4; CDK6; CHEK1; CHUK; CSF1R; CSNK1D; CSNK2A1; DYRK2; EGFR; EIF2AK2; EPHA2; ERBB2; FES; FGFR1; FGFR3; FGR; FYN; GSK3A; HCK; IGF1R; IKBKB; ITK; JAK1; KSR1; LCK; LYN; MAP2K5; MAP2K6; MAP2K7; MAP3K1; MAP3K12; MAP3K14; MAP3K2; MAP3K3; MAP3K5; MAP3K6; MAP3K7; MAP3K8; MAP4K1; MAP4K4; MAPK13; MA…
Class I PI3K signaling events mediated by Akt	99	1285	37.0787	5.54913	4.13947e-48	6.90463e-45	2.87693e-46	1.26965e-45	ABL1; AKT1; AKT2; AKT3; AR; BLK; BMPR1A; BMX; BRAF; BTK; CAMK2A; CAMK2B; CAMK2G; CAMK4; CDK1; CDK11B; CDK2; CDK4; CDK6; CHEK1; CHUK; CSF1R; CSNK1D; CSNK2A1; DYRK2; EGFR; EIF2AK2; EPHA2; ERBB2; FES; FGFR1; FGFR3; FGR; FYN; GSK3A; HCK; IGF1R; IKBKB; ITK; JAK1; KSR1; LCK; LYN; MAP2K5; MAP2K6; MAP2K7; MAP3K1; MAP3K12; MAP3K14; MAP3K2; MAP3K3; MAP3K5; MAP3K6; MAP3K7; MAP3K8; MAP4K1; MAP4K4; MAPK13; MA…
Regulation of CDC42 activity	65	768	24.3446	6.09629	6.26633e-33	1.04522e-29	2.09045e-31	9.2256e-31	AKT1; AR; BLK; BRAF; CAMK2A; CAMK2B; CAMK4; CDK1; CDK11B; CDK2; CDK4; CDK6; CSNK2A1; FGR; FYN; HCK; JAK1; LCK; LIMK1; LIMK2; LYN; MAP2K6; MAP2K7; MAP3K1; MAP3K11; MAP3K12; MAP3K3; MAP3K5; MAP3K6; MAP3K7; MAP3K8; MAPK13; MAPK14; MAPK3; MAPT; NR3C1; PDGFRA; PDPK1; PIM1; PITX2; PKN1; PKN2; PRKACA; PRKACG; PRKCA; PRKCB; PRKCE; PRKCG; PRKCH; PRKCQ; PRKCZ; PTK2B; RAF1; RIPK1; RPS6KA3; RPS6KA4; RPS6KA5;…
CDC42 signaling events	65	755	24.3446	6.20125	2.26254e-33	3.77392e-30	7.70188e-32	3.39901e-31	AKT1; AR; BLK; BRAF; CAMK2A; CAMK2B; CAMK4; CDK1; CDK11B; CDK2; CDK4; CDK6; CSNK2A1; FGR; FYN; HCK; JAK1; LCK; LIMK1; LIMK2; LYN; MAP2K6; MAP2K7; MAP3K1; MAP3K11; MAP3K12; MAP3K3; MAP3K5; MAP3K6; MAP3K7; MAP3K8; MAPK13; MAPK14; MAPK3; MAPT; NR3C1; PDGFRA; PDPK1; PIM1; PITX2; PKN1; PKN2; PRKACA; PRKACG; PRKCA; PRKCB; PRKCE; PRKCG; PRKCH; PRKCQ; PRKCZ; PTK2B; RAF1; RIPK1; RPS6KA3; RPS6KA4; RPS6KA5;…
Integrin-linked kinase signaling	59	654	22.0974	6.4982	2.68664e-31	4.48131e-28	8.45531e-30	3.73151e-29	AKT1; AR; BLK; BRAF; CAMK2A; CAMK2B; CAMK4; CDK1; CDK11B; CDK2; CDK4; CDK6; CSNK2A1; FGR; FYN; HCK; JAK1; LCK; LYN; MAP2K6; MAP3K1; MAP3K12; MAP3K3; MAP3K5; MAP3K6; MAP3K7; MAP3K8; MAPK13; MAPK14; MAPK3; MAPT; NR3C1; PDGFRA; PDPK1; PIM1; PITX2; PKN1; PRKACA; PRKACG; PRKCA; PRKCB; PRKCE; PRKCG; PRKCH; PRKCQ; PRKCZ; PTK2B; RAF1; RIPK1; RPS6KA3; RPS6KA4; RPS6KA5; SRC; TAOK3; TGFBR1; TGFBR2; TYK2; VA…
AP-1 transcription factor network	59	621	22.0974	6.84351	1.57145e-32	2.62118e-29	5.04072e-31	2.22458e-30	AKT1; AR; BLK; BRAF; CAMK2A; CAMK2B; CAMK4; CDK1; CDK11B; CDK2; CDK4; CDK6; CSNK2A1; FGR; FYN; HCK; JAK1; LCK; LYN; MAP2K6; MAP3K1; MAP3K12; MAP3K3; MAP3K5; MAP3K6; MAP3K7; MAP3K8; MAPK13; MAPK14; MAPK3; MAPT; NR3C1; PDGFRA; PDPK1; PIM1; PITX2; PKN1; PRKACA; PRKACG; PRKCA; PRKCB; PRKCE; PRKCG; PRKCH; PRKCQ; PRKCZ; PTK2B; RAF1; RIPK1; RPS6KA3; RPS6KA4; RPS6KA5; SRC; TAOK3; TGFBR1; TGFBR2; TYK2; VA…
TNF receptor signaling pathway	52	299	19.4757	12.5272	5.23152e-42	8.72617e-39	2.12833e-40	9.3928e-40	AKT1; BLK; CAMK2B; CAMK4; CDK4; CHUK; CSNK2A1; EIF2AK2; FGR; FYN; HCK; IKBKB; KSR1; LCK; LIMK1; LYN; MAP2K6; MAP2K7; MAP3K1; MAP3K12; MAP3K14; MAP3K3; MAP3K5; MAP3K6; MAP3K7; MAP3K8; MAP4K2; MAP4K4; MAPK13; MAPK14; MAPK3; MAPT; PIM1; PKN1; PRKACA; PRKCA; PRKCB; PRKCE; PRKCG; PRKCH; PRKCQ; PRKCZ; PTK2; RAF1; RIPK1; RIPK2; RPS6KA4; RPS6KA5; SLK; SRC; TAOK3; YES1;
ALK1 pathway	50	324	18.7266	11.116	1.00322e-37	1.67337e-34	3.89155e-36	1.71743e-35	ACVR1; ACVR2B; AKT1; AMHR2; AR; BLK; CAMK2A; CAMK2B; CAMK4; CDK2; CDK4; CSNK2A1; FGR; FYN; HCK; LCK; LYN; MAP2K6; MAP3K1; MAP3K12; MAP3K3; MAP3K5; MAP3K6; MAP3K7; MAP3K8; MAPK13; MAPK14; MAPK3; MAPT; NR3C1; PDPK1; PIM1; PKN1; PRKACA; PRKCA; PRKCB; PRKCE; PRKCG; PRKCH; PRKCQ; PRKCZ; RAF1; RIPK1; RPS6KA4; RPS6KA5; SRC; TAOK3; TGFBR1; TGFBR2; YES1;
ALK1 signaling events	49	321	18.3521	10.9956	9.89477e-37	1.65045e-33	3.75102e-35	1.65541e-34	ACVR1; ACVR2B; AKT1; AR; BLK; CAMK2A; CAMK2B; CAMK4; CDK2; CDK4; CSNK2A1; FGR; FYN; HCK; LCK; LYN; MAP2K6; MAP3K1; MAP3K12; MAP3K3; MAP3K5; MAP3K6; MAP3K7; MAP3K8; MAPK13; MAPK14; MAPK3; MAPT; NR3C1; PDPK1; PIM1; PKN1; PRKACA; PRKCA; PRKCB; PRKCE; PRKCG; PRKCH; PRKCQ; PRKCZ; RAF1; RIPK1; RPS6KA4; RPS6KA5; SRC; TAOK3; TGFBR1; TGFBR2; YES1;
Signal Transduction	47	1208	17.603	2.80267	1.13695e-10	1.89644e-07	1.50511e-09	6.64237e-09	ACVR2B; ADRBK1; AKT1; AKT2; BMPR1A; BRAF; CAMK4; CDK1; CHEK1; CHUK; EGFR; FER; FES; FGFR1; FGFR3; FLT4; IKBKB; IRAK1; KIT; MAP2K5; MAPK14; MAPK3; MAPK7; NTRK1; NTRK2; PDGFRA; PDGFRB; PDPK1; PRKAA2; PRKACA; PRKACG; PRKCA; PRKCE; PRKCG; PRKCH; PRKCQ; PTK2; RAF1; RIPK2; RPS6KA1; RPS6KA2; RPS6KA3; RPS6KA5; SRC; STK11; TGFBR1; TGFBR2;
Regulation of cytoplasmic and nuclear SMAD2/3 signaling	47	305	17.603	11.1001	2.02091e-35	3.37087e-32	7.17207e-34	3.16519e-33	AKT1; AR; BLK; CAMK2A; CAMK2B; CAMK4; CDK2; CDK4; CSNK2A1; FGR; FYN; HCK; LCK; LYN; MAP2K6; MAP3K1; MAP3K12; MAP3K3; MAP3K5; MAP3K6; MAP3K7; MAP3K8; MAPK13; MAPK14; MAPK3; MAPT; NR3C1; PDPK1; PIM1; PKN1; PRKACA; PRKCA; PRKCB; PRKCE; PRKCG; PRKCH; PRKCQ; PRKCZ; RAF1; RIPK1; RPS6KA4; RPS6KA5; SRC; TAOK3; TGFBR1; TGFBR2; YES1;
TGF-beta receptor signaling	47	305	17.603	11.1001	2.02091e-35	3.37087e-32	7.17207e-34	3.16519e-33	AKT1; AR; BLK; CAMK2A; CAMK2B; CAMK4; CDK2; CDK4; CSNK2A1; FGR; FYN; HCK; LCK; LYN; MAP2K6; MAP3K1; MAP3K12; MAP3K3; MAP3K5; MAP3K6; MAP3K7; MAP3K8; MAPK13; MAPK14; MAPK3; MAPT; NR3C1; PDPK1; PIM1; PKN1; PRKACA; PRKCA; PRKCB; PRKCE; PRKCG; PRKCH; PRKCQ; PRKCZ; RAF1; RIPK1; RPS6KA4; RPS6KA5; SRC; TAOK3; TGFBR1; TGFBR2; YES1;
Regulation of nuclear SMAD2/3 signaling	47	305	17.603	11.1001	2.02091e-35	3.37087e-32	7.17207e-34	3.16519e-33	AKT1; AR; BLK; CAMK2A; CAMK2B; CAMK4; CDK2; CDK4; CSNK2A1; FGR; FYN; HCK; LCK; LYN; MAP2K6; MAP3K1; MAP3K12; MAP3K3; MAP3K5; MAP3K6; MAP3K7; MAP3K8; MAPK13; MAPK14; MAPK3; MAPT; NR3C1; PDPK1; PIM1; PKN1; PRKACA; PRKCA; PRKCB; PRKCE; PRKCG; PRKCH; PRKCQ; PRKCZ; RAF1; RIPK1; RPS6KA4; RPS6KA5; SRC; TAOK3; TGFBR1; TGFBR2; YES1;
IL1-mediated signaling events	45	234	16.8539	13.8524	2.29227e-38	3.82351e-35	9.10358e-37	4.01761e-36	BLK; CAMK2B; CAMK4; CDK4; CHUK; CSNK2A1; FGR; FYN; HCK; IKBKB; IRAK1; IRAK3; LCK; LYN; MAP2K6; MAP3K1; MAP3K12; MAP3K14; MAP3K3; MAP3K5; MAP3K6; MAP3K7; MAP3K8; MAPK13; MAPK14; MAPK3; MAPT; PIM1; PKN1; PRKACA; PRKCA; PRKCB; PRKCE; PRKCG; PRKCH; PRKCQ; PRKCZ; RAF1; RIPK1; RIPK2; RPS6KA4; RPS6KA5; SRC; TAOK3; YES1;
BMP receptor signaling	40	226	14.9813	12.7495	1.25601e-32	2.09502e-29	4.10788e-31	1.8129e-30	BLK; BMPR1A; CAMK2B; CAMK4; CDK4; CSNK2A1; FGR; FYN; HCK; LCK; LYN; MAP2K6; MAP3K1; MAP3K12; MAP3K3; MAP3K5; MAP3K6; MAP3K7; MAP3K8; MAPK13; MAPK14; MAPK3; MAPT; PIM1; PKN1; PRKACA; PRKCA; PRKCB; PRKCE; PRKCG; PRKCH; PRKCQ; PRKCZ; RAF1; RIPK1; RPS6KA4; RPS6KA5; SRC; TAOK3; YES1;
p38 MAPK signaling pathway	39	189	14.6067	14.8643	1.53772e-34	2.56492e-31	5.34358e-33	2.35824e-32	BLK; CAMK2B; CAMK4; CDK4; CSNK2A1; FGR; FYN; HCK; LCK; LYN; MAP2K6; MAP3K1; MAP3K12; MAP3K3; MAP3K5; MAP3K6; MAP3K7; MAP3K8; MAPK13; MAPK14; MAPK3; MAPT; PIM1; PKN1; PRKACA; PRKCA; PRKCB; PRKCE; PRKCG; PRKCH; PRKCQ; PRKCZ; RAF1; RIPK1; RPS6KA4; RPS6KA5; SRC; TAOK3; YES1;
Immune System	38	522	14.2322	5.2441	5.0226e-17	8.3777e-14	1.14763e-15	5.06474e-15	AKT1; CDK1; CHUK; FYN; IKBKB; IRAK1; IRAK2; IRAK3; ITK; JAK1; KIT; LCK; LYN; MAP2K6; MAP2K7; MAP3K1; MAP3K14; MAP3K3; MAP3K7; MAP3K8; MAPK14; MAPK3; MAPK7; PDPK1; PRKCQ; PTK2B; RAF1; RIPK1; RIPK2; RIPK3; RPS6KA1; RPS6KA2; RPS6KA3; RPS6KA5; SRC; TBK1; TYK2; ZAP70;
CXCR4-mediated signaling events	35	190	13.1086	13.2699	3.03955e-29	5.06997e-26	9.38883e-28	4.1435e-27	ADRBK1; AKT1; BLK; BRAF; CHUK; FGR; FYN; GRK6; HCK; IKBKB; ITK; LCK; LIMK1; LYN; MAP3K1; MAP3K14; MAP3K7; MAP3K8; MAP4K1; MAPK14; MAPK3; PDPK1; PRKACA; PRKCA; PRKCB; PRKCE; PRKCQ; PRKCZ; PTK2; PTK2B; RAF1; RIPK2; SRC; YES1; ZAP70;
Regulation of p38-alpha and p38-beta	31	164	11.6105	13.6171	2.38655e-26	3.98076e-23	7.23775e-25	3.19418e-24	BLK; CAMK4; CDK4; CSNK2A1; FGR; FYN; HCK; LCK; LYN; MAP2K6; MAP3K1; MAP3K12; MAP3K3; MAP3K8; MAPK14; MAPK3; PIM1; PRKACA; PRKCA; PRKCB; PRKCE; PRKCG; PRKCH; PRKCQ; PRKCZ; RAF1; RIPK1; RPS6KA4; RPS6KA5; SRC; YES1;
Developmental Biology	29	432	10.8614	4.83622	2.49761e-12	4.16602e-09	3.71966e-11	1.64157e-10	ABL1; ACVR1B; ACVR1C; ACVR2B; AKT1; CDK1; CDK19; CDK4; CSNK2A1; EGFR; ERBB2; FES; FGFR1; FYN; LIMK1; MAP2K6; MAPK14; MAPK3; NTRK1; PRKCQ; PTK2; RAF1; RPS6KA1; RPS6KA2; RPS6KA3; RPS6KA4; RPS6KA5; RPS6KA6; SRC;
p75(NTR)-mediated signaling	28	178	10.4869	11.3324	1.33796e-21	2.23173e-18	3.78259e-20	1.66934e-19	ABL1; AKT1; BRAF; CAMK2A; CAMK4; CHUK; IKBKB; IRAK1; LCK; MAP2K5; MAP2K6; MAP3K14; MAP3K2; MAPK14; MAPK3; MAPK7; MATK; NTRK1; NTRK2; NTRK3; PDPK1; PRKCA; PRKCZ; RAF1; RIPK2; RPS6KA1; RPS6KA5; SRC;
Signalling by NGF	27	143	10.1124	13.6022	4.69696e-23	7.83452e-20	1.37448e-21	6.06587e-21	ADRBK1; AKT1; BRAF; CAMK4; CDK1; CHUK; IKBKB; IRAK1; MAP2K5; MAPK14; MAPK3; MAPK7; NTRK1; NTRK2; PDPK1; PRKACA; PRKACG; PRKCA; PRKCE; PRKCG; RAF1; RIPK2; RPS6KA1; RPS6KA2; RPS6KA3; RPS6KA5; SRC;
N-cadherin signaling events	26	251	9.73783	7.46279	1.50648e-15	2.51281e-12	2.92188e-14	1.28949e-13	ABL1; AKT1; AR; CAMK2A; CAMK2G; CAMK4; CDK11B; CDK6; CSNK1D; EGFR; FER; FGFR1; FGFR3; FYN; GSK3A; IGF1R; MAPK3; NTRK2; PDPK1; PITX2; PTK2B; RET; RPS6KA1; RPS6KA3; SRC; VAV3;
E-cadherin signaling events	26	280	9.73783	6.68989	2.09191e-14	3.4893e-11	3.56051e-13	1.57133e-12	ABL1; AKT1; AKT2; AR; CAMK2A; CAMK4; CDK11B; CDK6; CSNK1D; EGFR; EPHA2; FGFR1; FGFR3; FYN; GSK3A; IGF1R; MAPK3; NTRK2; PDPK1; PITX2; PTK2B; RET; RPS6KA1; RPS6KA3; SRC; VAV3;
Stabilization and expansion of the E-cadherin adherens junction	25	275	9.3633	6.54964	1.1016e-13	1.83747e-10	1.80144e-12	7.95014e-12	ABL1; AKT1; AR; CAMK2A; CAMK4; CDK11B; CDK6; CSNK1D; EGFR; EPHA2; FGFR1; FGFR3; FYN; GSK3A; IGF1R; MAPK3; NTRK2; PDPK1; PITX2; PTK2B; RET; RPS6KA1; RPS6KA3; SRC; VAV3;
E-cadherin signaling in the nascent adherens junction	25	275	9.3633	6.54964	1.1016e-13	1.83747e-10	1.80144e-12	7.95014e-12	ABL1; AKT1; AR; CAMK2A; CAMK4; CDK11B; CDK6; CSNK1D; EGFR; EPHA2; FGFR1; FGFR3; FYN; GSK3A; IGF1R; MAPK3; NTRK2; PDPK1; PITX2; PTK2B; RET; RPS6KA1; RPS6KA3; SRC; VAV3;
EGFR1	25	138	9.3633	13.0513	5.86064e-21	9.77554e-18	1.62926e-19	7.19027e-19	AKT1; ARAF; EGFR; JAK1; MAP3K14; MAP3K2; MAP3K3; MAPK14; MAPK3; MAPK7; PKN2; PRKCA; PRKCB; PRKCG; PRKCZ; PRKD1; PTK2B; PTK6; RAF1; RIPK1; RPS6KA1; RPS6KA3; SRC; TNK2; VAV3;
Hemostasis	24	375	8.98876	4.61107	5.6205e-10	9.375e-07	7.04887e-09	3.11082e-08	ABL1; AKT1; CDK2; FGR; FYN; LCK; LYN; MAPK14; MAPK3; MERTK; PDPK1; PRKACA; PRKACG; PRKCA; PRKCB; PRKCE; PRKCG; PRKCH; PRKCQ; PRKCZ; PTK2; RAF1; SRC; VAV3;
NGF signalling via TRKA from the plasma membrane	24	107	8.98876	16.1592	1.67148e-22	2.78803e-19	4.80694e-21	2.12141e-20	ADRBK1; AKT1; BRAF; CAMK4; CDK1; CHUK; MAP2K5; MAPK14; MAPK3; MAPK7; NTRK1; NTRK2; PDPK1; PRKACA; PRKACG; PRKCA; PRKCE; PRKCG; RAF1; RPS6KA1; RPS6KA2; RPS6KA3; RPS6KA5; SRC;
Posttranslational regulation of adherens junction stability and dissassembly	24	231	8.98876	7.48537	1.81511e-14	3.02761e-11	3.12125e-13	1.37748e-12	ABL1; AKT1; AR; CAMK2A; CAMK4; CDK11B; CDK6; CSNK1D; EGFR; FGFR1; FGFR3; FYN; GSK3A; IGF1R; MAPK3; NTRK2; PDPK1; PITX2; PTK2B; RET; RPS6KA1; RPS6KA3; SRC; VAV3;
FAS (CD95) signaling pathway	24	130	8.98876	13.3005	2.28836e-20	3.81699e-17	6.25735e-19	2.76151e-18	AKT1; BTK; CHUK; EIF2AK2; IKBKB; KSR1; LCK; LIMK1; MAP2K6; MAP2K7; MAP3K1; MAP3K14; MAP4K4; MAPK14; MAPK3; PDPK1; PRKCA; PRKCZ; PTK2; RAF1; RIPK1; RIPK2; SLK; SRC;
TCR signaling in na&#xef;ve CD4+ T cells	24	133	8.98876	13.0005	4.02731e-20	6.71755e-17	1.08348e-18	4.78162e-18	AKT1; BRAF; CHUK; FYN; IKBKB; ITK; LCK; MAP3K1; MAP3K14; MAP3K7; MAP3K8; MAP4K1; MAPK14; MAPK3; PDPK1; PRKACA; PRKCA; PRKCB; PRKCE; PRKCQ; RAF1; RIPK2; SRC; ZAP70;
Axon guidance	21	219	7.86517	6.90898	3.96423e-12	6.61233e-09	5.85162e-11	2.58245e-10	ABL1; CDK1; CSNK2A1; EGFR; ERBB2; FES; FGFR1; FYN; LIMK1; MAPK3; NTRK1; PRKCQ; PTK2; RAF1; RPS6KA1; RPS6KA2; RPS6KA3; RPS6KA4; RPS6KA5; RPS6KA6; SRC;
Innate Immune System	21	183	7.86517	8.26805	1.16235e-13	1.9388e-10	1.88233e-12	8.30713e-12	CDK1; CHUK; IKBKB; IRAK1; IRAK2; IRAK3; MAP2K6; MAP2K7; MAP3K1; MAP3K7; MAPK14; MAPK3; MAPK7; RIPK1; RIPK2; RIPK3; RPS6KA1; RPS6KA2; RPS6KA3; RPS6KA5; TBK1;
Neurotrophic factor-mediated Trk receptor signaling	21	101	7.86517	14.9801	4.27329e-19	7.12785e-16	1.11373e-17	4.91512e-17	ABL1; AKT1; BRAF; CAMK2A; CAMK4; MAP2K5; MAP2K6; MAP3K2; MAPK14; MAPK3; MAPK7; MATK; NTRK1; NTRK2; NTRK3; PDPK1; PRKCZ; RAF1; RPS6KA1; RPS6KA5; SRC;
Toll Receptor Cascades	20	90	7.49064	16.0106	7.42398e-19	1.23832e-15	1.87624e-17	8.28027e-17	CDK1; CHUK; IKBKB; IRAK1; IRAK2; IRAK3; MAP2K6; MAP2K7; MAP3K1; MAP3K7; MAPK14; MAPK3; MAPK7; RIPK1; RIPK3; RPS6KA1; RPS6KA2; RPS6KA3; RPS6KA5; TBK1;
Thromboxane A2 receptor signaling	20	54	7.49064	26.6824	7.2963e-24	1.21702e-20	2.17325e-22	9.59105e-22	ADRBK1; AKT1; BLK; EGFR; FGR; FYN; HCK; LCK; LYN; MAPK14; PRKACA; PRKCA; PRKCB; PRKCE; PRKCG; PRKCH; PRKCQ; PRKCZ; SRC; YES1;
Syndecan-4-mediated signaling events	20	209	7.49064	6.89496	1.36139e-11	2.2708e-08	1.92441e-10	8.49283e-10	AKT1; AR; CAMK2A; CAMK4; CDK11B; CDK6; CSNK1D; FGFR1; GSK3A; MAP3K7; NLK; PITX2; PRKCA; PRKCZ; PTK2; PTK2B; ROR2; RPS6KA3; VAV3; YES1;
Activated TLR4 signalling	19	72	7.1161	19.0126	1.63677e-19	2.73013e-16	4.33354e-18	1.91249e-17	CDK1; CHUK; IKBKB; IRAK1; IRAK2; IRAK3; MAP2K6; MAP2K7; MAP3K1; MAP3K7; MAPK14; MAPK3; MAPK7; RIPK1; RPS6KA1; RPS6KA2; RPS6KA3; RPS6KA5; TBK1;
Toll Like Receptor 4 (TLR4) Cascade	19	76	7.1161	18.0121	5.05988e-19	8.43989e-16	1.29844e-17	5.73032e-17	CDK1; CHUK; IKBKB; IRAK1; IRAK2; IRAK3; MAP2K6; MAP2K7; MAP3K1; MAP3K7; MAPK14; MAPK3; MAPK7; RIPK1; RPS6KA1; RPS6KA2; RPS6KA3; RPS6KA5; TBK1;
Cytokine Signaling in Immune system	19	193	7.1161	7.0934	2.73009e-11	4.55379e-08	3.79482e-10	1.67474e-09	CDK1; CHUK; FYN; IKBKB; IRAK1; IRAK2; IRAK3; JAK1; KIT; LYN; MAP2K6; MAP3K3; MAP3K7; MAP3K8; MAPK3; PTK2B; RAF1; SRC; TYK2;
TCR signaling in na&#xef;ve CD8+ T cells	19	127	7.1161	10.7794	1.31711e-14	2.19694e-11	2.3623e-13	1.04253e-12	AKT1; BRAF; CHUK; FYN; IKBKB; LCK; MAP3K14; MAP3K8; MAPK14; MAPK3; PDPK1; PRKCA; PRKCB; PRKCE; PRKCQ; RAF1; RIPK2; SRC; ZAP70;
IL2-mediated signaling events	19	115	7.1161	11.9042	1.98132e-15	3.30485e-12	3.75551e-14	1.65739e-13	AKT1; CDK2; CDK6; CHUK; FYN; IKBKB; JAK1; LCK; MAP3K14; MAPK14; MAPK3; PRKCA; PRKCB; PRKCE; PRKCZ; PTK2B; RAF1; RIPK2; SRC;
Platelet activation, signaling and aggregation	18	138	6.74157	9.39843	7.5581e-13	1.26069e-09	1.1566e-11	5.10432e-11	AKT1; FYN; LCK; LYN; MAPK14; MAPK3; PDPK1; PRKCA; PRKCB; PRKCE; PRKCG; PRKCH; PRKCQ; PRKCZ; PTK2; RAF1; SRC; VAV3;
Signaling by FGFR	18	95	6.74157	13.652	8.85168e-16	1.47646e-12	1.73701e-14	7.66582e-14	ADRBK1; AKT1; BRAF; CAMK4; CDK1; CHUK; EGFR; FGFR1; FGFR3; MAPK3; PDPK1; PRKACA; PRKACG; PRKCA; PRKCE; PRKCG; RAF1; SRC;
Wnt signaling network	18	200	6.74157	6.48506	4.0437e-10	6.74489e-07	5.14877e-09	2.27227e-08	AKT1; AR; CAMK2A; CAMK4; CDK11B; CDK6; CSNK1D; GSK3A; MAP3K7; NLK; PITX2; PRKCZ; PTK2B; ROR2; RPS6KA3; RYK; VAV3; YES1;
Glypican 3 network	18	206	6.74157	6.29618	6.54434e-10	1.0916e-06	8.14623e-09	3.59511e-08	AKT1; AR; CAMK2A; CAMK4; CDK11B; CDK6; CSNK1D; GSK3A; MAP3K7; NLK; PITX2; PRKCZ; PTK2B; ROR2; RPS6KA3; RYK; VAV3; YES1;
LPA receptor mediated events	18	100	6.74157	12.9695	2.29596e-15	3.82966e-12	4.30299e-14	1.899e-13	AKT1; CHUK; EGFR; IKBKB; LCK; LYN; MAP3K14; MAPK14; MAPT; PRKACA; PRKCA; PRKCE; PRKD1; PTK2; PTK2B; RIPK2; RPS6KA5; SRC;
Signaling by PDGF	17	78	6.36704	15.7038	4.67692e-16	7.80111e-13	9.28704e-15	4.09857e-14	ADRBK1; AKT1; CAMK4; CDK1; CHUK; EGFR; MAPK3; PDGFRA; PDGFRB; PDPK1; PRKACA; PRKACG; PRKCA; PRKCE; PRKCG; RAF1; SRC;
MyD88:Mal cascade initiated on plasma membrane	17	62	6.36704	19.7558	6.72209e-18	1.12124e-14	1.6735e-16	7.38552e-16	CDK1; CHUK; IKBKB; IRAK1; IRAK2; IRAK3; MAP2K6; MAP2K7; MAP3K1; MAP3K7; MAPK14; MAPK3; MAPK7; RPS6KA1; RPS6KA2; RPS6KA3; RPS6KA5;
Toll Like Receptor 2 (TLR2) Cascade	17	65	6.36704	18.8441	1.63577e-17	2.72847e-14	3.89782e-16	1.72019e-15	CDK1; CHUK; IKBKB; IRAK1; IRAK2; IRAK3; MAP2K6; MAP2K7; MAP3K1; MAP3K7; MAPK14; MAPK3; MAPK7; RPS6KA1; RPS6KA2; RPS6KA3; RPS6KA5;
Toll Like Receptor TLR1:TLR2 Cascade	17	64	6.36704	19.1385	1.22299e-17	2.03995e-14	2.95645e-16	1.30475e-15	CDK1; CHUK; IKBKB; IRAK1; IRAK2; IRAK3; MAP2K6; MAP2K7; MAP3K1; MAP3K7; MAPK14; MAPK3; MAPK7; RPS6KA1; RPS6KA2; RPS6KA3; RPS6KA5;
Toll Like Receptor TLR6:TLR2 Cascade	17	64	6.36704	19.1385	1.22299e-17	2.03995e-14	2.95645e-16	1.30475e-15	CDK1; CHUK; IKBKB; IRAK1; IRAK2; IRAK3; MAP2K6; MAP2K7; MAP3K1; MAP3K7; MAPK14; MAPK3; MAPK7; RPS6KA1; RPS6KA2; RPS6KA3; RPS6KA5;
Noncanonical Wnt signaling pathway	17	182	6.36704	6.73071	7.06147e-10	1.17785e-06	8.72484e-09	3.85046e-08	AKT1; AR; CAMK2A; CAMK4; CDK11B; CDK6; CSNK1D; GSK3A; MAP3K7; NLK; PITX2; PRKCZ; PTK2B; ROR2; RPS6KA3; VAV3; YES1;
Downstream signal transduction	16	75	5.99251	15.3718	5.00124e-15	8.34206e-12	9.1671e-14	4.04564e-13	ADRBK1; AKT1; CAMK4; CDK1; CHUK; EGFR; MAPK3; PDGFRB; PDPK1; PRKACA; PRKACG; PRKCA; PRKCE; PRKCG; RAF1; SRC;
TRIF mediated TLR3 signaling	16	56	5.99251	20.5863	3.08189e-17	5.14059e-14	7.13971e-16	3.15091e-15	CDK1; CHUK; IKBKB; MAP2K6; MAP2K7; MAP3K7; MAPK14; MAPK3; MAPK7; RIPK1; RIPK3; RPS6KA1; RPS6KA2; RPS6KA3; RPS6KA5; TBK1;
Toll Like Receptor 3 (TLR3) Cascade	16	56	5.99251	20.5863	3.08189e-17	5.14059e-14	7.13971e-16	3.15091e-15	CDK1; CHUK; IKBKB; MAP2K6; MAP2K7; MAP3K7; MAPK14; MAPK3; MAPK7; RIPK1; RIPK3; RPS6KA1; RPS6KA2; RPS6KA3; RPS6KA5; TBK1;
Toll Like Receptor 5 (TLR5) Cascade	16	60	5.99251	19.2141	1.05359e-16	1.7574e-13	2.25307e-15	9.9433e-15	CDK1; CHUK; IKBKB; IRAK1; IRAK2; MAP2K6; MAP2K7; MAP3K1; MAP3K7; MAPK14; MAPK3; MAPK7; RPS6KA1; RPS6KA2; RPS6KA3; RPS6KA5;
Toll Like Receptor 7/8 (TLR7/8) Cascade	16	62	5.99251	18.5944	1.87792e-16	3.13237e-13	3.96503e-15	1.74985e-14	CDK1; CHUK; IKBKB; IRAK1; IRAK2; MAP2K6; MAP2K7; MAP3K1; MAP3K7; MAPK14; MAPK3; MAPK7; RPS6KA1; RPS6KA2; RPS6KA3; RPS6KA5;
MyD88 dependent cascade initiated on endosome	16	60	5.99251	19.2141	1.05359e-16	1.7574e-13	2.25307e-15	9.9433e-15	CDK1; CHUK; IKBKB; IRAK1; IRAK2; MAP2K6; MAP2K7; MAP3K1; MAP3K7; MAPK14; MAPK3; MAPK7; RPS6KA1; RPS6KA2; RPS6KA3; RPS6KA5;
TRAF6 mediated induction of NFkB and MAP kinases upon TLR7/8 or 9 activation	16	59	5.99251	19.5397	7.82256e-17	1.3048e-13	1.73974e-15	7.67784e-15	CDK1; CHUK; IKBKB; IRAK1; IRAK2; MAP2K6; MAP2K7; MAP3K1; MAP3K7; MAPK14; MAPK3; MAPK7; RPS6KA1; RPS6KA2; RPS6KA3; RPS6KA5;
Toll Like Receptor 9 (TLR9) Cascade	16	65	5.99251	17.7363	4.28997e-16	7.15567e-13	8.62129e-15	3.80476e-14	CDK1; CHUK; IKBKB; IRAK1; IRAK2; MAP2K6; MAP2K7; MAP3K1; MAP3K7; MAPK14; MAPK3; MAPK7; RPS6KA1; RPS6KA2; RPS6KA3; RPS6KA5;
Toll Like Receptor 10 (TLR10) Cascade	16	60	5.99251	19.2141	1.05359e-16	1.7574e-13	2.25307e-15	9.9433e-15	CDK1; CHUK; IKBKB; IRAK1; IRAK2; MAP2K6; MAP2K7; MAP3K1; MAP3K7; MAPK14; MAPK3; MAPK7; RPS6KA1; RPS6KA2; RPS6KA3; RPS6KA5;
MyD88 cascade initiated on plasma membrane	16	59	5.99251	19.5397	7.82256e-17	1.3048e-13	1.73974e-15	7.67784e-15	CDK1; CHUK; IKBKB; IRAK1; IRAK2; MAP2K6; MAP2K7; MAP3K1; MAP3K7; MAPK14; MAPK3; MAPK7; RPS6KA1; RPS6KA2; RPS6KA3; RPS6KA5;
Signaling by Interleukins	16	92	5.99251	12.5317	1.49441e-13	2.49267e-10	2.37397e-12	1.04769e-11	CDK1; CHUK; FYN; IKBKB; IRAK1; IRAK2; IRAK3; JAK1; KIT; MAP2K6; MAP3K3; MAP3K7; MAP3K8; MAPK3; PTK2B; RAF1;
Role of Calcineurin-dependent NFAT signaling in lymphocytes	16	95	5.99251	12.136	2.52039e-13	4.20402e-10	3.96605e-12	1.75031e-11	CAMK4; CDK4; CSNK2A1; MAP3K1; MAP3K8; MAPK14; MAPK3; PIM1; PRKACA; PRKCA; PRKCB; PRKCE; PRKCG; PRKCH; PRKCQ; PRKCZ;
Trk receptor signaling mediated by PI3K and PLC-gamma	16	63	5.99251	18.2993	2.48626e-16	4.14708e-13	5.18384e-15	2.28774e-14	AKT1; BRAF; CAMK2A; CAMK4; MAP2K5; MAP2K6; MAP3K2; MAPK14; MAPK3; MAPK7; NTRK1; PDPK1; RAF1; RPS6KA1; RPS6KA5; SRC;
TNF alpha/NF-kB	16	171	5.99251	6.74251	2.20854e-09	3.68384e-06	2.59426e-08	1.1449e-07	AKT1; AKT2; CHUK; CSNK2A1; MAP3K14; MAP3K2; MAP3K3; MAP3K8; PKN1; PRKACA; PRKCZ; RIPK1; RIPK2; RIPK3; SRC; TBK1;
Signaling by EGFR	15	98	5.61798	11.0297	6.05677e-12	1.01027e-08	8.63478e-11	3.81072e-10	ADRBK1; AKT1; CAMK4; CDK1; CHUK; EGFR; MAPK3; PDPK1; PRKACA; PRKACG; PRKCA; PRKCE; PRKCG; RAF1; SRC;
MyD88-independent cascade initiated on plasma membrane	15	58	5.61798	18.635	1.61764e-15	2.69823e-12	3.10142e-14	1.36872e-13	CDK1; CHUK; IKBKB; MAP2K6; MAP2K7; MAP3K7; MAPK14; MAPK3; MAPK7; RIPK1; RPS6KA1; RPS6KA2; RPS6KA3; RPS6KA5; TBK1;
Regulation of RAC1 activity	15	205	5.61798	5.273	1.89648e-07	0.000316334	1.83915e-06	8.11657e-06	CDK4; LIMK1; LIMK2; MAP2K6; MAP2K7; MAP3K1; MAP3K11; MAPK14; MAPK3; PDGFRA; PKN1; PKN2; PRKCA; PRKCZ; VAV3;
RAC1 signaling pathway	15	205	5.61798	5.273	1.89648e-07	0.000316334	1.83915e-06	8.11657e-06	CDK4; LIMK1; LIMK2; MAP2K6; MAP2K7; MAP3K1; MAP3K11; MAPK14; MAPK3; PDGFRA; PKN1; PKN2; PRKCA; PRKCZ; VAV3;
Androgen-mediated signaling	15	130	5.61798	8.31488	3.7728e-10	6.29303e-07	4.84079e-09	2.13635e-08	AKT1; AR; CDK11B; CDK6; MAP2K6; MAPK14; MAPK3; NR3C1; PKN1; PTK2; PTK2B; RAF1; RPS6KA3; SRC; VAV3;
RhoA signaling pathway	15	205	5.61798	5.273	1.89648e-07	0.000316334	1.83915e-06	8.11657e-06	CDK4; LIMK1; LIMK2; MAP2K6; MAP2K7; MAP3K1; MAP3K11; MAPK14; MAPK3; PDGFRA; PKN1; PKN2; PRKCA; PRKCZ; VAV3;
Regulation of RhoA activity	15	205	5.61798	5.273	1.89648e-07	0.000316334	1.83915e-06	8.11657e-06	CDK4; LIMK1; LIMK2; MAP2K6; MAP2K7; MAP3K1; MAP3K11; MAPK14; MAPK3; PDGFRA; PKN1; PKN2; PRKCA; PRKCZ; VAV3;
Adaptive Immune System	14	237	5.24345	4.25719	6.12871e-06	0.0102227	5.2424e-05	0.000231359	AKT1; CHUK; FYN; IKBKB; ITK; LCK; MAP3K14; MAP3K7; MAP3K8; PDPK1; PRKCQ; RAF1; RIPK2; ZAP70;
NFkB and MAP kinases activation mediated by TLR4 signaling repertoire	14	54	5.24345	18.6817	1.39133e-14	2.32074e-11	2.41744e-13	1.06687e-12	CDK1; CHUK; IKBKB; MAP2K6; MAP2K7; MAP3K7; MAPK14; MAPK3; MAPK7; RIPK1; RPS6KA1; RPS6KA2; RPS6KA3; RPS6KA5;
Fc-epsilon receptor I signaling in mast cells	14	61	5.24345	16.5382	8.85156e-14	1.47644e-10	1.47644e-12	6.51585e-12	AKT1; BTK; CHUK; FER; FYN; IKBKB; ITK; LYN; MAP2K7; MAP3K1; MAPK3; PRKCB; PTK2; RAF1;
BCR signaling pathway	14	67	5.24345	15.0574	3.57275e-13	5.95935e-10	5.56948e-12	2.45794e-11	AKT1; BTK; CAMK2G; CHUK; CSNK2A1; IKBKB; LYN; MAP3K1; MAP3K7; MAP4K1; MAPK14; MAPK3; PDPK1; RAF1;
Signaling events mediated by PTP1B	14	52	5.24345	19.4001	7.77359e-15	1.29663e-11	1.40939e-13	6.21992e-13	AKT1; BLK; CSF1R; EGFR; FER; FGR; FYN; HCK; LCK; LYN; PDGFRB; SRC; TYK2; YES1;
KitReceptor	14	54	5.24345	18.6817	1.39133e-14	2.32074e-11	2.41744e-13	1.06687e-12	AKT1; FES; FGR; FYN; HCK; KIT; LYN; MATK; PRKCA; PRKCB; RAF1; RPS6KA1; SRC; YES1;
Neurotransmitter Receptor Binding And Downstream Transmission In The Postsynaptic Cell	13	89	4.86891	10.5267	2.92708e-10	4.88237e-07	3.78478e-09	1.67031e-08	BRAF; CAMK2A; CAMK2B; CAMK2D; CAMK2G; CAMK4; CAMKK1; PDPK1; RAF1; RPS6KA1; RPS6KA2; RPS6KA3; RPS6KA6;
Activation of NMDA receptor upon glutamate binding and postsynaptic events	13	34	4.86891	27.5501	3.8081e-16	6.35191e-13	7.74623e-15	3.41858e-14	BRAF; CAMK2A; CAMK2B; CAMK2D; CAMK2G; CAMK4; CAMKK1; PDPK1; RAF1; RPS6KA1; RPS6KA2; RPS6KA3; RPS6KA6;
Post NMDA receptor activation events	13	34	4.86891	27.5501	3.8081e-16	6.35191e-13	7.74623e-15	3.41858e-14	BRAF; CAMK2A; CAMK2B; CAMK2D; CAMK2G; CAMK4; CAMKK1; PDPK1; RAF1; RPS6KA1; RPS6KA2; RPS6KA3; RPS6KA6;
Neuronal System	13	188	4.86891	4.98366	2.3684e-06	0.0039505	2.11257e-05	9.32321e-05	BRAF; CAMK2A; CAMK2B; CAMK2D; CAMK2G; CAMK4; CAMKK1; PDPK1; RAF1; RPS6KA1; RPS6KA2; RPS6KA3; RPS6KA6;
Transmission across Chemical Synapses	13	121	4.86891	7.74298	1.37703e-08	2.29689e-05	1.49149e-07	6.58226e-07	BRAF; CAMK2A; CAMK2B; CAMK2D; CAMK2G; CAMK4; CAMKK1; PDPK1; RAF1; RPS6KA1; RPS6KA2; RPS6KA3; RPS6KA6;
Downstream signaling of activated FGFR	13	66	4.86891	14.1945	5.65357e-12	9.43015e-09	8.12944e-11	3.5877e-10	ADRBK1; AKT1; CAMK4; CDK1; CHUK; MAPK3; PDPK1; PRKACA; PRKACG; PRKCA; PRKCE; PRKCG; RAF1;
TRAF6 Mediated Induction of proinflammatory cytokines	13	50	4.86891	18.7358	1.19524e-13	1.99366e-10	1.91698e-12	8.46005e-12	CDK1; CHUK; IKBKB; MAP2K6; MAP2K7; MAP3K7; MAPK14; MAPK3; MAPK7; RPS6KA1; RPS6KA2; RPS6KA3; RPS6KA5;
EphrinA-EPHA pathway	13	43	4.86891	21.7851	1.34315e-14	2.24038e-11	2.38338e-13	1.05184e-12	BLK; EPHA1; EPHA2; EPHA4; FGR; FYN; HCK; LCK; LYN; PTK2; SRC; VAV3; YES1;
PLK1 signaling events	13	104	4.86891	9.00854	2.11675e-09	3.53073e-06	2.50407e-08	1.1051e-07	AKT1; AURKB; CDC25C; CDK1; CHUK; IKBKB; LCK; MAP3K14; MAPK14; PRKACA; PRKCA; RIPK2; SRC;
EphrinB-EPHB pathway	13	60	4.86891	15.6137	1.53826e-12	2.56582e-09	2.33257e-11	1.02941e-10	BLK; EPHB1; FGR; FYN; HCK; LCK; LYN; MAP3K7; MAP4K4; MAPK3; PTK2; SRC; YES1;
Polo-like kinase signaling events in the cell cycle	13	109	4.86891	8.59534	3.80399e-09	6.34506e-06	4.40629e-08	1.94459e-07	AKT1; AURKB; CDC25C; CDK1; CHUK; IKBKB; LCK; MAP3K14; MAPK14; PRKACA; PRKCA; RIPK2; SRC;
Wnt	13	82	4.86891	11.4252	1.01246e-10	1.68878e-07	1.35102e-09	5.96236e-09	CAMK2A; CAMK2B; CAMK2D; CAMK2G; CDC25C; CDK1; CSNK1D; CSNK2A1; MAP3K7; NLK; PRKCA; PRKCB; PRKCG;
L1CAM interactions	12	79	4.49438	10.9474	8.99585e-10	1.50051e-06	1.10331e-08	4.86917e-08	CSNK2A1; EGFR; FGFR1; MAPK3; NTRK1; RPS6KA1; RPS6KA2; RPS6KA3; RPS6KA4; RPS6KA5; RPS6KA6; SRC;
EPHA forward signaling	12	31	4.49438	27.8929	4.47579e-15	7.46561e-12	8.29512e-14	3.66082e-13	BLK; EPHA1; EPHA2; EPHA4; FGR; FYN; HCK; LCK; LYN; SRC; VAV3; YES1;
Integrins in angiogenesis	12	64	4.49438	13.5129	6.93847e-11	1.15734e-07	9.40924e-10	4.1525e-09	AKT1; CHUK; CSF1R; IGF1R; MAP3K1; MAP3K14; MAPK3; PTK2; PTK2B; SRC; TGFBR2; VAV3;
Signaling by Aurora kinases	12	98	4.49438	8.8252	1.12971e-08	1.88436e-05	1.23161e-07	5.43535e-07	AKT1; AURKB; AURKC; CHUK; IKBKB; LCK; MAP3K14; MAPK14; PRKACA; PRKCA; RIPK2; SRC;
Signaling events regulated by Ret tyrosine kinase	12	69	4.49438	12.5338	1.75122e-10	2.92103e-07	2.28206e-09	1.00712e-08	CHUK; IKBKB; LCK; MAP3K14; MAPK14; MAPK3; PRKACA; PRKCA; PTK2; RET; RIPK2; SRC;
ATM pathway	12	307	4.49438	2.81736	0.00127121	1	0.00777853	0.0343284	ABL1; AKT1; CDC25C; CDK1; CDK2; CHEK1; CSNK1D; DYRK2; EGFR; EPHA2; MAP4K4; MAPK14;
Regulation of Androgen receptor activity	12	108	4.49438	8.00813	3.42974e-08	5.7208e-05	3.5755e-07	1.57795e-06	AKT1; AR; CDK11B; CDK6; MAP2K6; MAPK14; NR3C1; PKN1; PTK2B; RPS6KA3; SRC; VAV3;
TGFBR	12	125	4.49438	6.91911	1.75831e-07	0.000293287	1.74575e-06	7.70439e-06	AR; CAMK2G; CDK1; CDK2; CDK4; CDK6; MAP2K6; MAP3K7; MAPK14; PRKCB; PRKCG; TGFBR2;
CREB phosphorylation through the activation of Ras	11	28	4.11985	28.3091	5.2442e-14	8.74733e-11	8.83568e-13	3.89938e-12	BRAF; CAMK2A; CAMK2B; CAMK2D; CAMK2G; PDPK1; RAF1; RPS6KA1; RPS6KA2; RPS6KA3; RPS6KA6;
Cell Cycle, Mitotic	11	317	4.11985	2.5013	0.00494865	1	0.0260389	0.114916	AURKB; CDC25C; CDC7; CDK1; CDK2; CDK4; CDK6; CSNK1D; DYRK1A; PKMYT1; PRKACA;
Signaling by GPCR	11	800	4.11985	0.99116	0.556587	1	1	1	ADRBK1; AKT1; CAMK4; PDPK1; PRKACA; PRKACG; PRKCA; PRKCE; PRKCG; PRKCH; PRKCQ;
Signaling by SCF-KIT	11	66	4.11985	12.0124	1.64571e-09	2.74505e-06	1.97486e-08	8.71548e-08	AKT1; CDK1; CHEK1; CHUK; FER; FES; KIT; MAPK3; PDPK1; PRKCA; RAF1;
Canonical Wnt signaling pathway	11	155	4.11985	5.1154	1.11556e-05	0.0186075	9.16624e-05	0.000404526	AKT1; AR; CAMK4; CDK11B; CDK6; CSNK1D; GSK3A; PITX2; PTK2B; RPS6KA3; VAV3;
Alpha-synuclein signaling	11	33	4.11985	24.0211	4.44497e-13	7.41422e-10	6.86502e-12	3.02968e-11	BLK; CSNK2A1; FGR; FYN; HCK; LCK; LYN; MAPK3; PTK2B; SRC; YES1;
ATR signaling pathway	11	250	4.11985	3.17163	0.000777294	1	0.00496753	0.0219228	ABL1; AKT1; CDC25C; CDK2; CHEK1; CSNK1D; DYRK2; EGFR; EPHA2; MAP4K4; MAPK14;
IL12-mediated signaling events	11	111	4.11985	7.14294	4.17965e-07	0.000697166	3.96117e-06	1.74815e-05	CHUK; IKBKB; JAK1; LCK; MAP2K6; MAP3K14; MAPK14; PRKCA; RIPK2; SRC; TYK2;
IL2 signaling events mediated by PI3K	11	67	4.11985	11.8331	1.945e-09	3.24425e-06	2.31732e-08	1.02269e-07	AKT1; CHUK; IKBKB; JAK1; LCK; MAP3K14; MAPK14; PRKCA; PRKCZ; RIPK2; SRC;
Aurora A signaling	11	64	4.11985	12.3877	1.16762e-09	1.94758e-06	1.41129e-08	6.22834e-08	AKT1; AURKB; CHUK; IKBKB; LCK; MAP3K14; MAPK14; PRKACA; PRKCA; RIPK2; SRC;
Signal transduction by L1	10	35	3.74532	20.5918	3.04356e-11	5.07665e-08	4.19558e-10	1.8516e-09	CSNK2A1; EGFR; FGFR1; MAPK3; RPS6KA1; RPS6KA2; RPS6KA3; RPS6KA4; RPS6KA5; RPS6KA6;
MAP kinase activation in TLR cascade	10	30	3.74532	24.0226	5.29486e-12	8.83182e-09	7.67985e-11	3.38928e-10	CDK1; MAP2K6; MAP2K7; MAPK14; MAPK3; MAPK7; RPS6KA1; RPS6KA2; RPS6KA3; RPS6KA5;
CD40/CD40L signaling	10	58	3.74532	12.4275	6.53356e-09	1.0898e-05	7.3635e-08	3.24967e-07	AKT1; CHUK; IKBKB; LCK; MAP3K1; MAP3K14; MAPK14; PRKCA; RIPK2; SRC;
Ephrin B reverse signaling	10	30	3.74532	24.0226	5.29486e-12	8.83182e-09	7.67985e-11	3.38928e-10	BLK; EPHB1; FGR; FYN; HCK; LCK; LYN; MAP3K7; SRC; YES1;
amb2 Integrin signaling	10	40	3.74532	18.0185	1.3221e-10	2.20526e-07	1.73642e-09	7.66321e-09	AKT1; BLK; FGR; FYN; HCK; LCK; LYN; PRKCZ; SRC; YES1;
IL8- and CXCR1-mediated signaling events	10	28	3.74532	25.7379	2.3699e-12	3.953e-09	3.56126e-11	1.57166e-10	ADRBK1; AKT1; FGR; HCK; LYN; PDPK1; PRKCA; PRKCB; PRKCE; PRKCG;
Syndecan-2-mediated signaling events	10	77	3.74532	9.36136	1.08965e-07	0.000181753	1.0949e-06	4.83202e-06	AKT1; CAMK2A; FGFR1; FGFR3; MAPK3; PDPK1; PRKACA; PTK2B; RPS6KA1; SRC;
p53 pathway	10	189	3.74532	3.81418	0.000321313	0.535951	0.00216109	0.00953737	ABL1; AKT1; CDK2; CHEK1; CSNK1D; DYRK2; EGFR; EPHA2; MAP4K4; MAPK14;
IL8-mediated signaling events	10	38	3.74532	18.9665	7.5555e-11	1.26026e-07	1.01634e-09	4.48532e-09	ADRBK1; AKT1; FGR; HCK; LYN; PDPK1; PRKCA; PRKCB; PRKCE; PRKCG;
Endogenous TLR signaling	10	57	3.74532	12.6455	5.47343e-09	9.12968e-06	6.25321e-08	2.75968e-07	CHUK; IKBKB; IRAK1; IRAK2; LCK; MAP3K14; MAPK14; PRKCA; RIPK2; SRC;
Trk receptor signaling mediated by the MAPK pathway	10	34	3.74532	21.1972	2.20068e-11	3.67074e-08	3.08466e-10	1.36133e-09	BRAF; MAP2K5; MAP2K6; MAP3K2; MAPK14; MAPK3; MAPK7; RAF1; RPS6KA1; RPS6KA5;
Alpha6Beta4Integrin	10	48	3.74532	15.016	9.25245e-10	1.54331e-06	1.1265e-08	4.9715e-08	ABL1; AKT1; AR; EGFR; ERBB2; FYN; PRKCA; PTK2; SRC; YES1;
TCR signaling	9	47	3.37079	13.8034	1.4405e-08	2.40275e-05	1.55016e-07	6.84119e-07	CHUK; IKBKB; ITK; LCK; MAP3K7; PDPK1; PRKCQ; RIPK2; ZAP70;
Interleukin-1 signaling	9	39	3.37079	16.6342	2.46833e-09	4.11717e-06	2.87914e-08	1.27063e-07	CHUK; IKBKB; IRAK1; IRAK2; IRAK3; MAP2K6; MAP3K3; MAP3K7; MAP3K8;
FGF signaling pathway	9	48	3.37079	13.5159	1.75157e-08	2.92161e-05	1.8609e-07	8.21255e-07	AKT1; CAMK2A; FGFR1; FGFR3; MAPK3; PDPK1; PTK2B; RPS6KA1; SRC;
Signaling events mediated by TCPTP	9	92	3.37079	7.05248	5.32973e-06	0.00888999	4.60621e-05	0.000203282	AKT1; CSF1R; EGFR; EIF2AK2; FES; JAK1; MAPK14; PDGFRB; SRC;
Ceramide signaling pathway	9	49	3.37079	13.2401	2.11983e-08	3.53587e-05	2.22382e-07	9.81421e-07	AKT1; EIF2AK2; KSR1; MAP3K1; MAP4K4; MAPK3; PRKCZ; RAF1; RIPK1;
Regulation of nuclear beta catenin signaling and target gene transcription	9	135	3.37079	4.8063	0.000114262	0.19059	0.000824989	0.00364086	AKT1; AR; CAMK4; CDK11B; CDK6; PITX2; PTK2B; RPS6KA3; VAV3;
Signaling events mediated by Stem cell factor receptor (c-Kit)	9	52	3.37079	12.4764	3.66067e-08	6.106e-05	3.79255e-07	1.67373e-06	AKT1; FER; KIT; LYN; MAP4K1; MAPK3; MATK; PDPK1; RAF1;
Validated transcriptional targets of AP1 family members Fra1 and Fra2	9	134	3.37079	4.84216	0.000107934	0.180033	0.00078962	0.00348476	BRAF; CDK4; MAPK3; PRKACA; PRKCA; PRKCB; PRKCE; PRKCQ; RAF1;
IL23-mediated signaling events	9	66	3.37079	9.83031	3.10882e-07	0.000518551	2.96315e-06	1.3077e-05	CHUK; IKBKB; LCK; MAP3K14; MAPK14; PRKCA; RIPK2; SRC; TYK2;
Mesenchymal-to-epithelial transition	9	223	3.37079	2.90973	0.00407807	1	0.0218721	0.0965264	DDR1; EPHA1; ERBB2; ERBB3; FGFR3; MAPK13; PTK6; STYK1; VAV3;
NCAM signaling for neurite out-growth	8	57	2.99625	10.1189	1.14103e-06	0.00190324	1.05151e-05	4.64055e-05	CDK1; FGFR1; FYN; MAPK3; PTK2; RAF1; RPS6KA5; SRC;
Recycling pathway of L1	8	32	2.99625	18.0218	9.80443e-09	1.63538e-05	1.08303e-07	4.77966e-07	NTRK1; RPS6KA1; RPS6KA2; RPS6KA3; RPS6KA4; RPS6KA5; RPS6KA6; SRC;
PLC-gamma1 signalling	8	30	2.99625	19.2229	5.58843e-09	9.3215e-06	6.34116e-08	2.79849e-07	ADRBK1; CAMK4; NTRK1; PRKACA; PRKACG; PRKCA; PRKCE; PRKCG;
EGFR interacts with phospholipase C-gamma	8	29	2.99625	19.8855	4.14775e-09	6.91844e-06	4.77134e-08	2.1057e-07	ADRBK1; CAMK4; EGFR; PRKACA; PRKACG; PRKCA; PRKCE; PRKCG;
Metabolism	8	823	2.99625	0.700938	0.889244	1	1	1	AKT1; MAPK14; PRKAA2; PRKACA; PRKACG; PRKCA; PRKG2; STK11;
Downstream TCR signaling	8	32	2.99625	18.0218	9.80443e-09	1.63538e-05	1.08303e-07	4.77966e-07	CHUK; IKBKB; LCK; MAP3K7; PDPK1; PRKCQ; RIPK2; ZAP70;
Canonical NF-kappaB pathway	8	35	2.99625	16.4775	2.11617e-08	3.52977e-05	2.22382e-07	9.81421e-07	CHUK; IKBKB; LCK; MAP3K14; MAPK14; PRKCA; RIPK2; SRC;
p73 transcription factor network	8	78	2.99625	7.39493	1.25927e-05	0.0210047	0.000102462	0.000452187	ABL1; CDK1; CDK2; CDK6; CHEK1; JAK1; MAPK14; NTRK1;
IL8- and CXCR2-mediated signaling events	8	34	2.99625	16.962	1.6522e-08	2.75588e-05	1.76659e-07	7.79634e-07	AKT1; FGR; HCK; LYN; PDPK1; PRKCA; PRKCB; PRKCG;
GPVI-mediated activation cascade	7	27	2.62172	18.6916	6.44056e-08	0.000107428	6.55052e-07	2.89089e-06	AKT1; FYN; LCK; LYN; PDPK1; PRKCZ; VAV3;
Nuclear Events (kinase and transcription factor activation)	7	15	2.62172	33.6348	5.38227e-10	8.97763e-07	6.80124e-09	3.00153e-08	MAPK14; MAPK3; MAPK7; RPS6KA1; RPS6KA2; RPS6KA3; RPS6KA5;
ERK/MAPK targets	7	12	2.62172	42.0365	6.86499e-11	1.14508e-07	9.38591e-10	4.14221e-09	MAPK14; MAPK3; MAPK7; RPS6KA1; RPS6KA2; RPS6KA3; RPS6KA5;
Signalling to ERKs	7	30	2.62172	16.823	1.42485e-07	0.000237664	1.42314e-06	6.28063e-06	BRAF; CDK1; MAPK14; MAPK3; NTRK1; RAF1; SRC;
IRS-mediated signalling	7	51	2.62172	9.89725	6.31851e-06	0.0105393	5.37718e-05	0.000237307	AKT2; CDK1; MAPK3; PDPK1; PRKAA2; RAF1; STK11;
IRS-related events	7	53	2.62172	9.52384	8.21587e-06	0.0137041	6.92125e-05	0.00030545	AKT2; CDK1; MAPK3; PDPK1; PRKAA2; RAF1; STK11;
Signaling by Insulin receptor	7	79	2.62172	6.38981	0.000113698	0.189648	0.000824989	0.00364086	AKT2; CDK1; MAPK3; PDPK1; PRKAA2; RAF1; STK11;
Insulin receptor signalling cascade	7	56	2.62172	9.01373	1.19307e-05	0.0199003	9.75507e-05	0.000430513	AKT2; CDK1; MAPK3; PDPK1; PRKAA2; RAF1; STK11;
Phospholipase C-mediated cascade	7	27	2.62172	18.6916	6.44056e-08	0.000107428	6.55052e-07	2.89089e-06	ADRBK1; CAMK4; PRKACA; PRKACG; PRKCA; PRKCE; PRKCG;
DAG and IP3 signaling	7	27	2.62172	18.6916	6.44056e-08	0.000107428	6.55052e-07	2.89089e-06	ADRBK1; CAMK4; PRKACA; PRKACG; PRKCA; PRKCE; PRKCG;
Mitotic G1-G1/S phases	7	140	2.62172	3.60588	0.00345052	1	0.0188704	0.0832792	CDC7; CDK1; CDK2; CDK4; CDK6; DYRK1A; PKMYT1;
Apoptosis	7	158	2.62172	3.19511	0.00664543	1	0.0336917	0.148689	AKT1; BMX; DAPK1; MAPT; PRKCQ; PTK2; RIPK1;
MAPK targets/ Nuclear events mediated by MAP kinases	7	21	2.62172	24.0295	9.05623e-09	1.51058e-05	1.01381e-07	4.47417e-07	MAPK14; MAPK3; MAPK7; RPS6KA1; RPS6KA2; RPS6KA3; RPS6KA5;
CXCR3-mediated signaling events	7	37	2.62172	13.6411	6.63174e-07	0.00110617	6.24958e-06	2.75807e-05	AKT1; MAP2K6; MAPK14; MAPK3; PDPK1; RAF1; SRC;
ErbB2/ErbB3 signaling events	7	38	2.62172	13.2823	8.03346e-07	0.00133998	7.52798e-06	3.32226e-05	AKT1; ERBB2; ERBB3; MAPK3; PRKACA; RAF1; SRC;
Downstream signaling in na&#xef;ve CD8+ T cells	7	65	2.62172	7.76586	3.22041e-05	0.0537165	0.000251012	0.00110777	BRAF; MAPK3; PRKCA; PRKCB; PRKCE; PRKCQ; RAF1;
Coregulation of Androgen receptor activity	7	61	2.62172	8.27502	2.11564e-05	0.0352888	0.000168846	0.000745154	AKT1; AR; CDK11B; CDK6; PTK2B; RPS6KA3; VAV3;
Ras signaling in the CD4+ TCR pathway	7	42	2.62172	12.0176	1.63783e-06	0.00273191	1.47671e-05	6.51703e-05	BRAF; MAP3K8; MAPK3; PRKACA; PRKCA; PRKCB; RAF1;
Netrin-mediated signaling events	7	32	2.62172	15.7719	2.30051e-07	0.000383725	2.21806e-06	9.7888e-06	CAMK2A; DAPK1; FYN; MAPK3; PTK2; SRC; YES1;
Angiopoietin receptor Tie2-mediated signaling	7	50	2.62172	10.0952	5.51611e-06	0.00920087	4.74272e-05	0.000209307	AKT1; BMX; FES; FYN; MAPK14; MAPK3; PTK2;
Retinoic acid receptors-mediated signaling	7	47	2.62172	10.7394	3.59866e-06	0.00600256	3.15924e-05	0.000139424	AKT1; CDK1; MAPK14; MAPK3; PRKACA; PRKCA; PRKCG;
Mitotic M-M/G1 phases	6	242	2.24719	1.78852	0.121734	1	0.408555	1	AURKB; CDC7; CDK1; CDK2; CSNK1D; PRKACA;
DNA Replication	6	261	2.24719	1.65832	0.156514	1	0.505941	1	AURKB; CDC7; CDK1; CDK2; CSNK1D; PRKACA;
Signalling to RAS	6	21	2.24719	20.6016	3.08552e-07	0.000514665	2.95785e-06	1.30536e-05	CDK1; MAPK14; MAPK3; NTRK1; RAF1; SRC;
Calmodulin induced events	6	25	2.24719	17.3066	9.61104e-07	0.00160312	8.90623e-06	3.93051e-05	ADRBK1; CAMK4; PRKACA; PRKACG; PRKCA; PRKCG;
CaM pathway	6	25	2.24719	17.3066	9.61104e-07	0.00160312	8.90623e-06	3.93051e-05	ADRBK1; CAMK4; PRKACA; PRKACG; PRKCA; PRKCG;
Mitotic G2-G2/M phases	6	99	2.24719	4.37167	0.00258459	1	0.0146636	0.0647138	CDC25C; CDK1; CDK2; CSNK1D; PKMYT1; PRKACA;
GPCR downstream signaling	6	530	2.24719	0.816662	0.748412	1	1	1	ADRBK1; AKT1; PDPK1; PRKCE; PRKCH; PRKCQ;
Opioid Signalling	6	53	2.24719	8.16523	8.99729e-05	0.150075	0.000661122	0.00291768	ADRBK1; CAMK4; PRKACA; PRKACG; PRKCA; PRKCG;
PLC beta mediated events	6	39	2.24719	11.0956	1.50427e-05	0.0250913	0.000121802	0.00053754	ADRBK1; CAMK4; PRKACA; PRKACG; PRKCA; PRKCG;
G-protein mediated events	6	40	2.24719	10.8183	1.74928e-05	0.029178	0.000140956	0.000622072	ADRBK1; CAMK4; PRKACA; PRKACG; PRKCA; PRKCG;
Ca-dependent events	6	27	2.24719	16.0251	1.56939e-06	0.00261775	1.42269e-05	6.27864e-05	ADRBK1; CAMK4; PRKACA; PRKACG; PRKCA; PRKCG;
CD28 co-stimulation	6	36	2.24719	12.02	9.29937e-06	0.0155114	7.75568e-05	0.000342275	AKT1; FYN; LCK; MAP3K14; MAP3K8; PDPK1;
CD28 dependent PI3K/Akt signaling	6	17	2.24719	25.4462	7.37361e-08	0.000122992	7.45405e-07	3.28963e-06	AKT1; FYN; LCK; MAP3K14; MAP3K8; PDPK1;
Costimulation by the CD28 family	6	52	2.24719	8.32223	8.07173e-05	0.134637	0.000595737	0.00262912	AKT1; FYN; LCK; MAP3K14; MAP3K8; PDPK1;
Osteopontin-mediated events	6	29	2.24719	14.9203	2.46045e-06	0.00410404	2.17145e-05	9.58308e-05	CHUK; MAP3K1; MAP3K14; MAPK3; PTK2B; VAV3;
IL6-mediated signaling events	6	47	2.24719	9.20738	4.5114e-05	0.0752501	0.000338965	0.00149592	AKT1; HCK; JAK1; MAP2K6; MAPK14; TYK2;
VEGFR1 specific signals	6	29	2.24719	14.9203	2.46045e-06	0.00410404	2.17145e-05	9.58308e-05	AKT1; MAPK3; PDPK1; PRKACA; PRKCA; PRKCB;
p63 transcription factor network	6	105	2.24719	4.12188	0.00346569	1	0.0188914	0.0833719	ABL1; AXL; CHUK; CSNK1D; GSK3A; IKBKB;
C-MYB transcription factor network	6	84	2.24719	5.15223	0.00111375	1	0.0069061	0.0304781	CDK6; CSF1R; KIT; MAP3K7; NLK; PIM1;
Glucocorticoid receptor signaling	6	85	2.24719	5.09163	0.00118464	1	0.00729144	0.0321787	AKT1; MAPK14; MAPK3; NR3C1; PRKACA; PRKACG;
Glucocorticoid receptor regulatory network	6	80	2.24719	5.40981	0.00086215	1	0.00546794	0.0241312	AKT1; MAPK14; MAPK3; NR3C1; PRKACA; PRKACG;
JNK signaling in the CD4+ TCR pathway	6	42	2.24719	10.3032	2.33576e-05	0.0389605	0.000185526	0.000818768	MAP3K1; MAP3K7; MAP3K8; MAP4K1; PRKACA; PRKCB;
Nongenotropic Androgen signaling	6	26	2.24719	16.6413	1.23495e-06	0.0020599	1.12563e-05	4.96764e-05	AKT1; AR; MAPK3; PTK2; RAF1; SRC;
Regulation of retinoblastoma protein	6	66	2.24719	6.55717	0.000306357	0.511003	0.00208573	0.00920477	ABL1; CDK2; CDK4; CDK6; MAPK14; RAF1;
AndrogenReceptor	6	78	2.24719	5.54851	0.00075409	1	0.00485646	0.0214326	AKT1; AR; CDK1; CDK9; GTF2F1; PAK6;
Epithelial-to-mesenchymal transition	6	185	2.24719	2.33954	0.0447231	1	0.181063	0.799072	AKT3; AXL; CDK14; DDR2; FYN; NR3C1;
RSK activation	5	7	1.87266	51.4721	1.02053e-08	1.70225e-05	1.1199e-07	4.94238e-07	PDPK1; RPS6KA1; RPS6KA2; RPS6KA3; RPS6KA6;
HIV Infection	5	203	1.87266	1.77735	0.152924	1	0.499172	1	CDK9; FYN; GTF2F1; HCK; LCK;
Signalling to p38 via RIT and RIN	5	16	1.87266	22.5371	1.91569e-06	0.00319537	1.71794e-05	7.58164e-05	BRAF; CDK1; MAPK3; NTRK1; RAF1;
Frs2-mediated activation	5	19	1.87266	18.9805	4.92853e-06	0.00822079	4.28166e-05	0.000188959	BRAF; CDK1; MAPK3; NTRK1; RAF1;
ARMS-mediated activation	5	18	1.87266	20.0344	3.67311e-06	0.00612675	3.20772e-05	0.000141564	BRAF; CDK1; MAPK3; NTRK1; RAF1;
Prolonged ERK activation events	5	20	1.87266	18.0319	6.49705e-06	0.0108371	5.50106e-05	0.000242774	BRAF; CDK1; MAPK3; NTRK1; RAF1;
GAB1 signalosome	5	32	1.87266	11.2721	7.364e-05	0.122832	0.000548355	0.00242001	AKT1; CHUK; EGFR; PDPK1; SRC;
G2/M Transition	5	96	1.87266	3.75814	0.0109059	1	0.0528812	0.233376	CDC25C; CDK1; CSNK1D; PKMYT1; PRKACA;
Cell Cycle Checkpoints	5	118	1.87266	3.05753	0.0244865	1	0.1095	0.483246	CDC25C; CDC7; CDK1; CDK2; CHEK1;
G2/M DNA damage checkpoint	5	29	1.87266	12.4378	4.49293e-05	0.074942	0.000338965	0.00149592	CDC25C; CDC7; CDK1; CDK2; CHEK1;
G2/M Checkpoints	5	43	1.87266	8.38919	0.00031082	0.518447	0.00209898	0.00926324	CDC25C; CDC7; CDK1; CDK2; CHEK1;
Integration of energy metabolism	5	83	1.87266	4.3467	0.00598558	1	0.0311026	0.137263	PRKAA2; PRKACA; PRKACG; PRKCA; STK11;
Cell-Cell communication	5	117	1.87266	3.08366	0.0237081	1	0.106591	0.470408	FYN; MAPK14; PTK2B; SRC; TESK1;
RIG-I/MDA5 mediated induction of IFN-alpha/beta pathways	5	67	1.87266	5.38456	0.00238063	1	0.0135989	0.0600151	CHUK; IKBKB; MAP3K1; RIPK1; TBK1;
Interleukin-2 signaling	5	28	1.87266	12.8818	3.76071e-05	0.0627286	0.00029041	0.00128164	CDK1; JAK1; MAPK3; PTK2B; RAF1;
Nucleotide-binding domain, leucine rich repeat containing receptor (NLR) signaling pathways	5	43	1.87266	8.38919	0.00031082	0.518447	0.00209898	0.00926324	CHUK; IKBKB; MAP2K6; MAP3K7; RIPK2;
NOD1/2 Signaling Pathway	5	26	1.87266	13.8723	2.57488e-05	0.0429489	0.000202589	0.000894071	CHUK; IKBKB; MAP2K6; MAP3K7; RIPK2;
Signaling events mediated by the Hedgehog family	5	65	1.87266	5.55021	0.00208223	1	0.0119764	0.0528546	ADRBK1; AKT1; CSNK1D; PRKACA; STK36;
ATF-2 transcription factor network	5	59	1.87266	6.11454	0.00134996	1	0.00807074	0.0356179	CDK4; MAPK14; MAPK3; PDGFRA; PRKCA;
VEGFR3 signaling in lymphatic endothelium	5	25	1.87266	14.427	2.10346e-05	0.0350857	0.000168681	0.000744426	AKT1; FLT4; MAPK14; MAPK3; RPS6KA1;
Caspase cascade in apoptosis	5	52	1.87266	6.9375	0.000758206	1	0.00486419	0.0214667	LIMK1; MAP3K1; PTK2; RIPK1; SLK;
Reelin signaling pathway	5	29	1.87266	12.4378	4.49293e-05	0.074942	0.000338965	0.00149592	AKT1; FYN; MAP2K7; MAP3K11; MAPT;
S1P3 pathway	5	29	1.87266	12.4378	4.49293e-05	0.074942	0.000338965	0.00149592	AKT1; AKT3; MAPK3; PDGFRB; SRC;
EPHB forward signaling	5	40	1.87266	9.01823	0.000219794	0.366616	0.00152123	0.00671351	EPHB1; MAP4K4; MAPK3; PTK2; SRC;
FoxO family signaling	5	49	1.87266	7.36216	0.000575426	0.959811	0.00379372	0.0167425	AKT1; CDK2; CHUK; CSNK1D; IKBKB;
FOXM1 transcription factor network	5	42	1.87266	8.58889	0.000277798	0.463367	0.00191474	0.00845016	AURKB; CDK1; CDK2; CDK4; GSK3A;
HIV-1 Nef: Negative effector of Fas and TNF-alpha	5	35	1.87266	10.3062	0.000114747	0.191397	0.000824989	0.00364086	CHUK; MAP2K7; MAP3K14; MAP3K5; RIPK1;
a6b1 and a6b4 Integrin signaling	5	35	1.87266	10.3062	0.000114747	0.191397	0.000824989	0.00364086	AKT1; EGFR; ERBB2; ERBB3; PRKCA;
E-cadherin signaling in keratinocytes	5	21	1.87266	17.1737	8.43096e-06	0.0140628	7.06675e-05	0.000311871	AKT1; AKT2; EGFR; FYN; SRC;
Semaphorin interactions	4	64	1.49813	4.51179	0.0120368	1	0.0576936	0.254614	ERBB2; FES; FYN; LIMK1;
Platelet Aggregation (Plug Formation)	4	29	1.49813	9.95517	0.000656577	1	0.0043117	0.0190285	AKT1; PDPK1; PTK2; SRC;
Integrin alphaIIb beta3 signaling	4	20	1.49813	14.4328	0.000147753	0.246452	0.00104429	0.00460867	AKT1; PDPK1; PTK2; SRC;
M Phase	4	158	1.49813	1.82773	0.177641	1	0.565003	1	AURKB; CDK1; CSNK1D; PRKACA;
Factors involved in megakaryocyte development and platelet production	4	119	1.49813	2.42668	0.084212	1	0.308716	1	ABL1; CDK2; PRKACA; PRKACG;
Glutamate Binding, Activation of AMPA Receptors and Synaptic Plasticity	4	21	1.49813	13.7458	0.000180535	0.301132	0.00126526	0.00558387	CAMK2A; CAMK2B; CAMK2D; CAMK2G;
Trafficking of AMPA receptors	4	21	1.49813	13.7458	0.000180535	0.301132	0.00126526	0.00558387	CAMK2A; CAMK2B; CAMK2D; CAMK2G;
Unblocking of NMDA receptor, glutamate binding and activation	4	11	1.49813	26.2306	1.11062e-05	0.0185251	9.16624e-05	0.000404526	CAMK2A; CAMK2B; CAMK2D; CAMK2G;
Ras activation uopn Ca2+ infux through NMDA receptor	4	17	1.49813	16.9782	7.50016e-05	0.125103	0.000556012	0.0024538	CAMK2A; CAMK2B; CAMK2D; CAMK2G;
CREB phosphorylation through the activation of CaMKII	4	15	1.49813	19.2405	4.3968e-05	0.0733387	0.000336416	0.00148468	CAMK2A; CAMK2B; CAMK2D; CAMK2G;
Host Interactions of HIV factors	4	141	1.49813	2.04808	0.133348	1	0.441319	1	CDK9; FYN; HCK; LCK;
PI3K/AKT activation	4	30	1.49813	9.62344	0.000749388	1	0.00484488	0.0213815	AKT1; CHUK; NTRK1; PDPK1;
SHC1 events in EGFR signaling	4	16	1.49813	18.0387	5.79855e-05	0.0967198	0.000433721	0.00191411	CDK1; EGFR; MAPK3; RAF1;
GRB2 events in EGFR signaling	4	15	1.49813	19.2405	4.3968e-05	0.0733387	0.000336416	0.00148468	CDK1; EGFR; MAPK3; RAF1;
PI3K Cascade	4	38	1.49813	7.59799	0.00185048	1	0.0108205	0.0477533	AKT2; PDPK1; PRKAA2; STK11;
G1/S Transition	4	117	1.49813	2.46816	0.0802737	1	0.295679	1	CDC7; CDK1; CDK2; PKMYT1;
CREB phosphorylation	4	7	1.49813	41.1982	1.23083e-06	0.00205303	1.12563e-05	4.96764e-05	RPS6KA1; RPS6KA2; RPS6KA3; RPS6KA5;
G alpha (q) signalling events	4	120	1.49813	2.40646	0.0862161	1	0.31537	1	ADRBK1; PRKCE; PRKCH; PRKCQ;
Integrin cell surface interactions	4	72	1.49813	4.01055	0.0178932	1	0.0822577	0.363021	AKT1; PDPK1; PTK2; SRC;
Activation of ATR in response to replication stress	4	37	1.49813	7.80328	0.00167374	1	0.00990001	0.0436909	CDC25C; CDC7; CDK2; CHEK1;
Metabolism of lipids and lipoproteins	4	257	1.49813	1.12369	0.479688	1	1	1	PRKAA2; PRKACA; PRKACG; PRKD1;
Apoptotic cleavage of cellular proteins	4	39	1.49813	7.40322	0.00203973	1	0.0117726	0.0519549	BMX; MAPT; PRKCQ; PTK2;
Apoptotic execution phase	4	48	1.49813	6.0154	0.00437788	1	0.0231819	0.102307	BMX; MAPT; PRKCQ; PTK2;
Viral dsRNA:TLR3:TRIF Complex Activates RIP1	4	13	1.49813	22.1983	2.35413e-05	0.0392668	0.000186099	0.000821294	CHUK; IKBKB; RIPK1; RIPK3;
Signaling events mediated by HDAC Class I	4	113	1.49813	2.55552	0.0726812	1	0.273662	1	ADRBK1; CAMK4; NR3C1; PRKACA;
C-MYC pathway	4	149	1.49813	1.93812	0.15359	1	0.500368	1	CDK4; ERBB2; PDGFRB; PIM1;
Regulation of Telomerase	4	68	1.49813	4.24643	0.0147819	1	0.0696505	0.307383	ABL1; AKT1; EGFR; MAPK3;
Signaling mediated by p38-alpha and p38-beta	4	50	1.49813	5.77483	0.00507097	1	0.0265263	0.117066	MAPK14; RAF1; RPS6KA4; RPS6KA5;
Alpha4 beta1 integrin signaling events	4	33	1.49813	8.74885	0.00108304	1	0.00674071	0.0297482	PRKACA; PTK2; PTK2B; SRC;
Hedgehog signaling events mediated by Gli proteins	4	48	1.49813	6.0154	0.00437788	1	0.0231819	0.102307	AKT1; CSNK1D; PRKACA; STK36;
ErbB4 signaling events	4	32	1.49813	9.02216	0.000962164	1	0.00607913	0.0268285	ERBB2; ERBB4; FYN; MAPK3;
IL4-mediated signaling events	4	62	1.49813	4.6573	0.0107968	1	0.0525047	0.231715	AKT1; FES; JAK1; MAPK14;
EPHA2 forward signaling	4	19	1.49813	15.192	0.000119502	0.199329	0.00085549	0.00377546	EPHA2; PTK2; SRC; VAV3;
Presenilin action in Notch and Wnt signaling	4	46	1.49813	6.27688	0.00375165	1	0.0203836	0.0899571	CSNK2A1; MAP3K7; MAPK3; NLK;
Atypical NF-kappaB pathway	4	14	1.49813	20.6138	3.25985e-05	0.0543742	0.000252903	0.00111612	IKBKB; LCK; MAPK14; SRC;
Signaling mediated by p38-gamma and p38-delta	4	11	1.49813	26.2306	1.11062e-05	0.0185251	9.16624e-05	0.000404526	MAP2K6; MAPK13; MAPT; PKN1;
The role of Nef in HIV-1 replication and disease pathogenesis	3	27	1.1236	8.0259	0.00605105	1	0.0311517	0.137479	FYN; HCK; LCK;
Nef and signal transduction	3	8	1.1236	27.0636	0.000140769	0.234803	0.000999164	0.00440953	FYN; HCK; LCK;
Sema3A PAK dependent Axon repulsion	3	15	1.1236	14.4423	0.00106422	1	0.00664836	0.0293407	FES; FYN; LIMK1;
CDO in myogenesis	3	24	1.1236	9.02872	0.0043172	1	0.0230067	0.101533	ABL1; MAP2K6; MAPK14;
Myogenesis	3	24	1.1236	9.02872	0.0043172	1	0.0230067	0.101533	ABL1; MAP2K6; MAPK14;
Signaling by NODAL	3	16	1.1236	13.5403	0.00129642	1	0.00777853	0.0343284	ACVR1B; ACVR1C; ACVR2B;
Cell surface interactions at the vascular wall	3	72	1.1236	3.01041	0.0786029	1	0.29331	1	FYN; LYN; MERTK;
Response to elevated platelet cytosolic Ca2+	3	39	1.1236	5.55703	0.0167394	1	0.0773444	0.341338	PRKCA; PRKCB; PRKCG;
Effects of PIP2 hydrolysis	3	20	1.1236	10.8336	0.00253312	1	0.0144206	0.0636413	PRKCE; PRKCH; PRKCQ;
Mitotic Prophase	3	62	1.1236	3.49588	0.0550238	1	0.216973	0.95755	CDK1; CSNK1D; PRKACA;
Golgi Cisternae Pericentriolar Stack Reorganization	3	62	1.1236	3.49588	0.0550238	1	0.216973	0.95755	CDK1; CSNK1D; PRKACA;
Netrin-1 signaling	3	45	1.1236	4.81625	0.0244661	1	0.1095	0.483246	PRKCQ; PTK2; SRC;
RAF/MAP kinase cascade	3	11	1.1236	19.6893	0.000402134	0.67076	0.00268304	0.0118408	CDK1; MAPK3; RAF1;
SOS-mediated signalling	3	15	1.1236	14.4423	0.00106422	1	0.00664836	0.0293407	CDK1; MAPK3; RAF1;
p75 NTR receptor-mediated signalling	3	39	1.1236	5.55703	0.0167394	1	0.0773444	0.341338	IKBKB; IRAK1; RIPK2;
mTOR signalling	3	27	1.1236	8.0259	0.00605105	1	0.0311517	0.137479	AKT2; PRKAA2; STK11;
p75NTR recruits signalling complexes	3	13	1.1236	16.6625	0.00068283	1	0.00443175	0.0195583	IKBKB; IRAK1; RIPK2;
p75NTR signals via NF-kB	3	16	1.1236	13.5403	0.00129642	1	0.00777853	0.0343284	IKBKB; IRAK1; RIPK2;
PIP3 activates AKT signaling	3	21	1.1236	10.3179	0.00292521	1	0.0161032	0.0710667	AKT1; CHUK; PDPK1;
PKB-mediated events	3	28	1.1236	7.73937	0.00670851	1	0.033806	0.149193	AKT2; PRKAA2; STK11;
SHC-related events	3	16	1.1236	13.5403	0.00129642	1	0.00777853	0.0343284	CDK1; MAPK3; RAF1;
SHC-mediated signalling	3	13	1.1236	16.6625	0.00068283	1	0.00443175	0.0195583	CDK1; MAPK3; RAF1;
Spry regulation of FGF signaling	3	16	1.1236	13.5403	0.00129642	1	0.00777853	0.0343284	BRAF; EGFR; SRC;
PI-3K cascade	3	27	1.1236	8.0259	0.00605105	1	0.0311517	0.137479	AKT1; CHUK; PDPK1;
Negative regulation of FGFR signaling	3	17	1.1236	12.7442	0.00155816	1	0.00924912	0.0408184	BRAF; EGFR; SRC;
FRS2-mediated cascade	3	15	1.1236	14.4423	0.00106422	1	0.00664836	0.0293407	CDK1; MAPK3; RAF1;
Loss of Nlp from mitotic centrosomes	3	61	1.1236	3.55318	0.0528837	1	0.212043	0.935794	CDK1; CSNK1D; PRKACA;
Regulation of mitotic cell cycle	3	81	1.1236	2.67596	0.102947	1	0.367699	1	AURKB; CDK1; CDK2;
Loss of proteins required for interphase microtubule organizationÃÂ from the centrosome	3	61	1.1236	3.55318	0.0528837	1	0.212043	0.935794	CDK1; CSNK1D; PRKACA;
APC/C-mediated degradation of cell cycle proteins	3	81	1.1236	2.67596	0.102947	1	0.367699	1	AURKB; CDK1; CDK2;
Cyclin A/B1 associated events during G2/M transition	3	14	1.1236	15.4732	0.000860166	1	0.00546794	0.0241312	CDC25C; CDK1; PKMYT1;
Recruitment of mitotic centrosome proteins and complexes	3	70	1.1236	3.09641	0.0735806	1	0.275803	1	CDK1; CSNK1D; PRKACA;
Centrosome maturation	3	70	1.1236	3.09641	0.0735806	1	0.275803	1	CDK1; CSNK1D; PRKACA;
Cyclin E associated events during G1/S transition	3	78	1.1236	2.77887	0.0945275	1	0.33981	1	CDK1; CDK2; PKMYT1;
S Phase	3	121	1.1236	1.79142	0.236639	1	0.736408	1	CDK1; CDK2; CDK4;
G1 Phase	3	31	1.1236	6.99064	0.00892817	1	0.0439298	0.193872	CDK1; CDK4; CDK6;
G0 and Early G1	3	21	1.1236	10.3179	0.00292521	1	0.0161032	0.0710667	CDK1; CDK2; DYRK1A;
Cyclin D associated events in G1	3	31	1.1236	6.99064	0.00892817	1	0.0439298	0.193872	CDK1; CDK4; CDK6;
G1/S DNA Damage Checkpoints	3	76	1.1236	2.85199	0.0890803	1	0.325133	1	CDC25C; CDK2; CHEK1;
Chk1/Chk2(Cds1) mediated inactivation of Cyclin B:Cdk1 complex	3	5	1.1236	43.2694	2.59287e-05	0.043249	0.000203047	0.000896092	CDC25C; CDK1; CHEK1;
Regulation of Insulin Secretion	3	48	1.1236	4.5153	0.0289363	1	0.122814	0.542004	PRKACA; PRKACG; PRKCA;
Regulation of mRNA Stability by Proteins that Bind AU-rich Elements	3	104	1.1236	2.08422	0.175884	1	0.564182	1	AKT1; MAPK14; PRKCA;
Metabolism of mRNA	3	234	1.1236	0.926369	0.633574	1	1	1	AKT1; MAPK14; PRKCA;
Metabolism of RNA	3	281	1.1236	0.77143	0.751301	1	1	1	AKT1; MAPK14; PRKCA;
Glucose metabolism	3	36	1.1236	6.01998	0.0134807	1	0.0641739	0.283213	PHKG2; PRKACA; PRKACG;
Metabolism of carbohydrates	3	92	1.1236	2.35604	0.13615	1	0.44881	1	PHKG2; PRKACA; PRKACG;
Generation of second messenger molecules	3	19	1.1236	11.4035	0.00217531	1	0.0124688	0.0550275	ITK; LCK; ZAP70;
Transcription	3	178	1.1236	1.21779	0.450245	1	1	1	CDK9; GTF2F1; MAPK3;
IRAK1 recruits IKK complex upon TLR7/8 or 9 stimulation	3	10	1.1236	21.6563	0.00029549	0.492878	0.00201999	0.00891466	CHUK; IKBKB; IRAK1;
TAK1 activates NFkB by phosphorylation and activation of IKKs complex	3	11	1.1236	19.6893	0.000402134	0.67076	0.00268304	0.0118408	CHUK; IKBKB; MAP2K6;
IRAK1 recruits IKK complex	3	10	1.1236	21.6563	0.00029549	0.492878	0.00201999	0.00891466	CHUK; IKBKB; IRAK1;
NF-kB activation through FADD/RIP-1 pathway mediated by caspase-8 and -10	3	8	1.1236	27.0636	0.000140769	0.234803	0.000999164	0.00440953	CHUK; IKBKB; RIPK1;
TRAF6 mediated NF-kB activation	3	13	1.1236	16.6625	0.00068283	1	0.00443175	0.0195583	CHUK; IKBKB; MAP3K1;
Interferon alpha/beta signaling	3	77	1.1236	2.81495	0.091787	1	0.334281	1	JAK1; SRC; TYK2;
Interferon Signaling	3	98	1.1236	2.21181	0.155616	1	0.504013	1	JAK1; SRC; TYK2;
Regulation of IFNA signaling	3	38	1.1236	5.70323	0.0156087	1	0.0727436	0.321033	JAK1; SRC; TYK2;
IKK complex recruitment mediated by RIP1	3	9	1.1236	24.0599	0.000208987	0.34859	0.00145246	0.00641002	CHUK; IKBKB; RIPK1;
Validated transcriptional targets of TAp63 isoforms	3	54	1.1236	4.01369	0.0390785	1	0.163776	0.722781	ABL1; CHUK; IKBKB;
LPA4-mediated signaling events	3	16	1.1236	13.5403	0.00129642	1	0.00777853	0.0343284	PRKACA; PRKCE; RPS6KA5;
IL2 signaling events mediated by STAT5	3	28	1.1236	7.73937	0.00670851	1	0.033806	0.149193	CDK6; JAK1; LCK;
Validated transcriptional targets of deltaNp63 isoforms	3	64	1.1236	3.38665	0.059426	1	0.23378	1	AXL; CSNK1D; GSK3A;
Signaling events mediated by HDAC Class II	3	38	1.1236	5.70323	0.0156087	1	0.0727436	0.321033	ADRBK1; CAMK4; NR3C1;
FOXA transcription factor networks	3	81	1.1236	2.67596	0.102947	1	0.367699	1	AKT1; AR; NR3C1;
Nephrin/Neph1 signaling in the kidney podocyte	3	25	1.1236	8.66772	0.00485609	1	0.0256328	0.113123	AKT1; FYN; PRKCZ;
Syndecan-3-mediated signaling events	3	17	1.1236	12.7442	0.00155816	1	0.00924912	0.0408184	EGFR; FYN; SRC;
Cellular roles of Anthrax toxin	3	22	1.1236	9.84914	0.00335263	1	0.0183953	0.0811827	MAP2K6; MAP2K7; MAPK3;
EPO signaling pathway	3	34	1.1236	6.374	0.0115293	1	0.0555884	0.245324	BTK; LYN; MAPK14;
Insulin-mediated glucose transport	3	29	1.1236	7.47258	0.0074068	1	0.0372125	0.164227	AKT1; AKT2; PRKCZ;
PDGFR-alpha signaling pathway	3	21	1.1236	10.3179	0.00292521	1	0.0161032	0.0710667	CSNK2A1; JAK1; PDGFRA;
Direct p53 effectors	3	138	1.1236	1.57075	0.300359	1	0.901076	1	EGFR; EPHA2; MAP4K4;
Signaling events mediated by PRL	3	23	1.1236	9.42111	0.00381632	1	0.0206676	0.0912107	CDK2; MAPK3; SRC;
Hedgehog	3	16	1.1236	13.5403	0.00129642	1	0.00777853	0.0343284	CDK1; DYRK1A; STK36;
Sema4D in semaphorin signaling	2	27	0.749064	5.35949	0.0536933	1	0.214259	0.945574	ERBB2; LIMK1;
Sema4D induced cell migration and growth-cone collapse	2	22	0.749064	6.577	0.0369626	1	0.155299	0.685367	ERBB2; LIMK1;
SEMA3A-Plexin repulsion signaling by inhibiting Integrin adhesion	2	14	0.749064	10.3326	0.0156564	1	0.0727436	0.321033	FES; FYN;
CRMPs in Sema3A signaling	2	16	0.749064	9.04184	0.0202735	1	0.0921425	0.406645	FES; FYN;
Netrin mediated repulsion signals	2	15	0.749064	9.64423	0.0179014	1	0.0822577	0.363021	PTK2; SRC;
Signal amplification	2	16	0.749064	9.04184	0.0202735	1	0.0921425	0.406645	MAPK14; SRC;
Platelet Adhesion to exposed collagen	2	13	0.749064	11.1268	0.0135427	1	0.0641739	0.283213	FYN; LYN;
Platelet sensitization by LDL	2	8	0.749064	18.0724	0.00508898	1	0.0265263	0.117066	FGR; MAPK14;
GP1b-IX-V activation signalling	2	9	0.749064	16.0666	0.00648326	1	0.0329697	0.145503	RAF1; SRC;
Transcriptional Regulation of White Adipocyte Differentiation	2	69	0.749064	2.09766	0.248655	1	0.768069	1	CDK19; CDK4;
Elongation arrest and recovery	2	31	0.749064	4.66817	0.0686312	1	0.258998	1	CDK9; GTF2F1;
Platelet homeostasis	2	40	0.749064	3.61809	0.106284	1	0.374012	1	FGR; MAPK14;
p130Cas linkage to MAPK signaling for integrins	2	10	0.749064	14.4615	0.0080302	1	0.0397459	0.175407	PTK2; SRC;
ADP signalling through P2Y purinoceptor 1	2	10	0.749064	14.4615	0.0080302	1	0.0397459	0.175407	MAPK14; SRC;
Thrombin signalling through proteinase activated receptors (PARs)	2	17	0.749064	8.51028	0.0227689	1	0.102645	0.452994	MAPK3; SRC;
GRB2:SOS provides linkage to MAPK signaling for Intergrins	2	10	0.749064	14.4615	0.0080302	1	0.0397459	0.175407	PTK2; SRC;
ERK activation	2	6	0.749064	24.0865	0.00277677	1	0.0154389	0.068135	CDK1; MAPK3;
ERK1 activation	2	3	0.749064	48.093	0.000570912	0.952282	0.0037789	0.0166771	CDK1; MAPK3;
CREB phosphorylation through the activation of CaMKK	2	6	0.749064	24.0865	0.00277677	1	0.0154389	0.068135	CAMK4; CAMKK1;
Pausing and recovery of Tat-mediated HIV-1 elongation	2	30	0.749064	4.82372	0.0647794	1	0.252458	1	CDK9; GTF2F1;
Pausing and recovery of HIV-1 elongation	2	31	0.749064	4.66817	0.0686312	1	0.258998	1	CDK9; GTF2F1;
Tat-mediated HIV-1 elongation arrest and recovery	2	30	0.749064	4.82372	0.0647794	1	0.252458	1	CDK9; GTF2F1;
Formation of HIV-1 elongation complex in the absence of HIV-1 Tat	2	42	0.749064	3.44584	0.115271	1	0.398904	1	CDK9; GTF2F1;
HIV-1 elongation arrest and recovery	2	31	0.749064	4.66817	0.0686312	1	0.258998	1	CDK9; GTF2F1;
HIV-1 Transcription Elongation	2	41	0.749064	3.52987	0.110753	1	0.386478	1	CDK9; GTF2F1;
Tat-mediated elongation of the HIV-1 transcript	2	41	0.749064	3.52987	0.110753	1	0.386478	1	CDK9; GTF2F1;
Formation of HIV-1 elongation complex containing HIV-1 Tat	2	41	0.749064	3.52987	0.110753	1	0.386478	1	CDK9; GTF2F1;
Transcription of the HIV genome	2	60	0.749064	2.41226	0.202608	1	0.637642	1	CDK9; GTF2F1;
Late Phase of HIV Life Cycle	2	92	0.749064	1.57331	0.366057	1	1	1	CDK9; GTF2F1;
HIV Life Cycle	2	103	0.749064	1.4053	0.41993	1	1	1	CDK9; GTF2F1;
Signalling to ERK5	2	2	0.749064	72.0198	0.000192069	0.320371	0.00134046	0.00591576	MAP2K5; MAPK7;
Activation of PKB	2	4	0.749064	36.0997	0.00113135	1	0.0069892	0.0308449	AKT2; PDPK1;
Regulation of AMPK activity via LKB1	2	16	0.749064	9.04184	0.0202735	1	0.0921425	0.406645	PRKAA2; STK11;
Energy dependent regulation of mTOR by LKB1-AMPK	2	17	0.749064	8.51028	0.0227689	1	0.102645	0.452994	PRKAA2; STK11;
p38MAPK events	2	9	0.749064	16.0666	0.00648326	1	0.0329697	0.145503	MAPK14; SRC;
NGF-independant TRKA activation	2	5	0.749064	28.8942	0.00186829	1	0.0108205	0.0477533	NTRK1; NTRK2;
Activation of TRKA receptors	2	6	0.749064	24.0865	0.00277677	1	0.0154389	0.068135	NTRK1; NTRK2;
NF-kB is activated and signals survival	2	13	0.749064	11.1268	0.0135427	1	0.0641739	0.283213	IKBKB; IRAK1;
AKT phosphorylates targets in the cytosol	2	9	0.749064	16.0666	0.00648326	1	0.0329697	0.145503	AKT1; CHUK;
FGFR ligand binding and activation	2	14	0.749064	10.3326	0.0156564	1	0.0727436	0.321033	FGFR1; FGFR3;
PKA activation	2	19	0.749064	7.61493	0.0281141	1	0.119628	0.527946	PRKACA; PRKACG;
PKA-mediated phosphorylation of CREB	2	20	0.749064	7.23437	0.0309564	1	0.130722	0.576907	PRKACA; PRKACG;
DNA Replication Pre-Initiation	2	98	0.749064	1.47699	0.39571	1	1	1	CDC7; CDK2;
M/G1 Transition	2	98	0.749064	1.47699	0.39571	1	1	1	CDC7; CDK2;
Regulation of APC/C activators between G1/S and early anaphase	2	78	0.749064	1.85566	0.294999	1	0.887036	1	CDK1; CDK2;
Cyclin B2 mediated events	2	6	0.749064	24.0865	0.00277677	1	0.0154389	0.068135	CDC25C; CDK1;
Polo-like kinase mediated events	2	18	0.749064	8.03775	0.0253837	1	0.111129	0.490435	CDC25C; PKMYT1;
Cyclin A:Cdk2-associated events at S phase entry	2	90	0.749064	1.60826	0.356046	1	1	1	CDK1; CDK2;
Unfolded Protein Response	2	63	0.749064	2.29741	0.217873	1	0.680546	1	ERN1; GSK3A;
Activation of Chaperones by IRE1alpha	2	45	0.749064	3.21617	0.129093	1	0.432383	1	ERN1; GSK3A;
Diabetes pathways	2	216	0.749064	0.670153	0.804472	1	1	1	ERN1; GSK3A;
Activation of the pre-replicative complex	2	30	0.749064	4.82372	0.0647794	1	0.252458	1	CDC7; CDK2;
Signaling by BMP	2	19	0.749064	7.61493	0.0281141	1	0.119628	0.527946	ACVR2B; BMPR1A;
Signaling by TGF beta	2	13	0.749064	11.1268	0.0135427	1	0.0641739	0.283213	TGFBR1; TGFBR2;
ERKs are inactivated	2	3	0.749064	48.093	0.000570912	0.952282	0.0037789	0.0166771	MAPK3; MAPK7;
Regulation of KIT signaling	2	9	0.749064	16.0666	0.00648326	1	0.0329697	0.145503	KIT; PRKCA;
G-protein beta:gamma signalling	2	11	0.749064	13.148	0.00972533	1	0.0474323	0.209329	AKT1; PDPK1;
G beta:gamma signalling through PI3Kgamma	2	8	0.749064	18.0724	0.00508898	1	0.0265263	0.117066	AKT1; PDPK1;
Translocation of ZAP-70 to Immunological synapse	2	7	0.749064	20.6505	0.00385192	1	0.0207258	0.0914677	LCK; ZAP70;
RNA Polymerase II Transcription	2	101	0.749064	1.43312	0.4103	1	1	1	CDK9; GTF2F1;
Formation and Maturation of mRNA Transcript	2	185	0.749064	0.782443	0.730142	1	1	1	CDK9; GTF2F1;
DARPP-32 events	2	18	0.749064	8.03775	0.0253837	1	0.111129	0.490435	PRKACA; PRKACG;
Gene Expression	2	378	0.749064	0.382952	0.9691	1	1	1	CDK9; GTF2F1;
Formation of RNA Pol II elongation complex	2	42	0.749064	3.44584	0.115271	1	0.398904	1	CDK9; GTF2F1;
RNA Polymerase II Pre-transcription Events	2	58	0.749064	2.49543	0.192502	1	0.609287	1	CDK9; GTF2F1;
RNA Polymerase II Transcription Elongation	2	42	0.749064	3.44584	0.115271	1	0.398904	1	CDK9; GTF2F1;
Tetrahydrobiopterin (BH4) synthesis, recycling, salvage and regulation	2	12	0.749064	12.0533	0.0115643	1	0.0555884	0.245324	AKT1; PRKG2;
eNOS activation and regulation	2	18	0.749064	8.03775	0.0253837	1	0.111129	0.490435	AKT1; PRKG2;
Metabolism of nitric oxide	2	18	0.749064	8.03775	0.0253837	1	0.111129	0.490435	AKT1; PRKG2;
p53-Dependent G1 DNA Damage Response	2	72	0.749064	2.01027	0.264109	1	0.806349	1	CDK2; CHEK1;
p53-Dependent G1/S DNA damage checkpoint	2	72	0.749064	2.01027	0.264109	1	0.806349	1	CDK2; CHEK1;
Pausing and recovery of elongation	2	31	0.749064	4.66817	0.0686312	1	0.258998	1	CDK9; GTF2F1;
p53-Independent G1/S DNA damage checkpoint	2	70	0.749064	2.0677	0.253805	1	0.781081	1	CDC25C; CHEK1;
p53-Independent DNA Damage Response	2	70	0.749064	2.0677	0.253805	1	0.781081	1	CDC25C; CHEK1;
Influenza Infection	2	140	0.749064	1.03392	0.581368	1	1	1	EIF2AK2; GTF2F1;
Meiotic Recombination	2	42	0.749064	3.44584	0.115271	1	0.398904	1	CDK2; CDK4;
Meiosis	2	72	0.749064	2.01027	0.264109	1	0.806349	1	CDK2; CDK4;
Activated AMPK stimulates fatty-acid oxidation in muscle	2	18	0.749064	8.03775	0.0253837	1	0.111129	0.490435	PRKAA2; STK11;
AMPK inhibits chREBP transcriptional activation activity	2	5	0.749064	28.8942	0.00186829	1	0.0108205	0.0477533	PRKAA2; STK11;
Regulation of Insulin Secretion by Glucagon-like Peptide-1	2	16	0.749064	9.04184	0.0202735	1	0.0921425	0.406645	PRKACA; PRKACG;
Glucagon signaling in metabolic regulation	2	33	0.749064	4.38533	0.0765525	1	0.286299	1	PRKACA; PRKACG;
PKA activation in glucagon signalling	2	17	0.749064	8.51028	0.0227689	1	0.102645	0.452994	PRKACA; PRKACG;
PKA-mediated phosphorylation of key metabolic factors	2	5	0.749064	28.8942	0.00186829	1	0.0108205	0.0477533	PRKACA; PRKACG;
Destabilization of mRNA by KSRP	2	19	0.749064	7.61493	0.0281141	1	0.119628	0.527946	AKT1; MAPK14;
Hormone-sensitive lipase (HSL)-mediated triacylglycerol hydrolysis	2	12	0.749064	12.0533	0.0115643	1	0.0555884	0.245324	PRKACA; PRKACG;
Gluconeogenesis	2	20	0.749064	7.23437	0.0309564	1	0.130722	0.576907	PRKACA; PRKACG;
Transmembrane transport of small molecules	2	378	0.749064	0.382952	0.9691	1	1	1	PRKACA; PRKACG;
Signal regulatory protein (SIRP) family interactions	2	11	0.749064	13.148	0.00972533	1	0.0474323	0.209329	PTK2B; SRC;
Regulation of Water Balance by Renal Aquaporins	2	24	0.749064	6.02915	0.0433741	1	0.176029	0.776855	PRKACA; PRKACG;
Lipid digestion, mobilization, and transport	2	46	0.749064	3.14627	0.133783	1	0.441881	1	PRKACA; PRKACG;
Aquaporin-mediated transport	2	27	0.749064	5.35949	0.0536933	1	0.214259	0.945574	PRKACA; PRKACG;
CD28 dependent Vav1 pathway	2	18	0.749064	8.03775	0.0253837	1	0.111129	0.490435	FYN; LCK;
CTLA4 inhibitory signaling	2	5	0.749064	28.8942	0.00186829	1	0.0108205	0.0477533	AKT1; PDPK1;
Growth hormone receptor signaling	2	18	0.749064	8.03775	0.0253837	1	0.111129	0.490435	LYN; MAPK3;
IRAK2 mediated activation of TAK1 complex upon TLR7/8 or 9 stimulation	2	10	0.749064	14.4615	0.0080302	1	0.0397459	0.175407	IRAK2; MAP3K7;
activated TAK1 mediates p38 MAPK activation	2	6	0.749064	24.0865	0.00277677	1	0.0154389	0.068135	MAP2K6; MAPK14;
JNK (c-Jun kinases) phosphorylation and activation mediated by activated human TAK1	2	7	0.749064	20.6505	0.00385192	1	0.0207258	0.0914677	MAP2K6; MAP2K7;
IRAK2 mediated activation of TAK1 complex	2	10	0.749064	14.4615	0.0080302	1	0.0397459	0.175407	IRAK2; MAP3K7;
Interleukin-3, 5 and GM-CSF signaling	2	29	0.749064	4.99	0.0610039	1	0.239422	1	FYN; KIT;
Aurora C signaling	2	5	0.749064	28.8942	0.00186829	1	0.0108205	0.0477533	AURKB; AURKC;
Validated targets of C-MYC transcriptional repression	2	63	0.749064	2.29741	0.217873	1	0.680546	1	ERBB2; PDGFRB;
Degradation of beta catenin	2	18	0.749064	8.03775	0.0253837	1	0.111129	0.490435	CSNK1D; GSK3A;
Notch-mediated HES/HEY network	2	94	0.749064	1.53983	0.376007	1	1	1	AR; CAMK2D;
p38 signaling mediated by MAPKAP kinases	2	21	0.749064	6.89004	0.0339071	1	0.142821	0.6303	MAPK14; RAF1;
IL27-mediated signaling events	2	26	0.749064	5.56554	0.0501643	1	0.202111	0.891961	JAK1; TYK2;
Aurora B signaling	2	41	0.749064	3.52987	0.110753	1	0.386478	1	AURKB; AURKC;
Lissencephaly gene (LIS1) in neuronal migration and development	2	31	0.749064	4.66817	0.0686312	1	0.258998	1	ABL1; CSNK2A1;
ALK2 signaling events	2	11	0.749064	13.148	0.00972533	1	0.0474323	0.209329	ACVR1; AMHR2;
Validated targets of C-MYC transcriptional activation	2	81	0.749064	1.78694	0.310385	1	0.926158	1	CDK4; PIM1;
Calcineurin-regulated NFAT-dependent transcription in lymphocytes	2	49	0.749064	2.95368	0.148073	1	0.484287	1	CDK4; PRKCQ;
S1P2 pathway	2	26	0.749064	5.56554	0.0501643	1	0.202111	0.891961	MAPK14; MAPK3;
FOXA2 and FOXA3 transcription factor networks	2	43	0.749064	3.36572	0.119835	1	0.402993	1	AKT1; NR3C1;
Beta3 integrin cell surface interactions	2	43	0.749064	3.36572	0.119835	1	0.402993	1	PDGFRB; TGFBR2;
Alternative NF-kappaB pathway	2	6	0.749064	24.0865	0.00277677	1	0.0154389	0.068135	CHUK; MAP3K14;
Notch signaling pathway	2	94	0.749064	1.53983	0.376007	1	1	1	AR; CAMK2D;
E2F transcription factor network	2	73	0.749064	1.98274	0.269262	1	0.818087	1	CDK1; CDK2;
ID	2	14	0.749064	10.3326	0.0156564	1	0.0727436	0.321033	CDK2; ELK3;
Interactions of Tat with host cellular proteins	1	2	0.374532	36.1891	0.027577	1	0.118248	0.521855	CDK9;
Nef Mediated CD4 Down-regulation	1	9	0.374532	8.07325	0.118264	1	0.399322	1	LCK;
Nef-mediates down modulation of cell surface receptors by recruiting them to clathrin adapters	1	20	0.374532	3.63518	0.244047	1	0.755233	1	LCK;
Regulation of beta-cell development	1	108	0.374532	0.673456	0.780035	1	1	1	AKT1;
Signaling by Robo receptor	1	23	0.374532	3.16123	0.275134	1	0.829878	1	ABL1;
Role of Abl in Robo-Slit signaling	1	9	0.374532	8.07325	0.118264	1	0.399322	1	ABL1;
Regulation of gene expression in beta cells	1	98	0.374532	0.742169	0.746835	1	1	1	AKT1;
AKT-mediated inactivation of FOXO1A	1	3	0.374532	24.1661	0.0410801	1	0.167126	0.737563	AKT1;
Mitotic Prometaphase	1	99	0.374532	0.734673	0.750368	1	1	1	AURKB;
DCC mediated attractive signaling	1	10	0.374532	7.26673	0.130513	1	0.432793	1	PTK2;
RAF activation	1	5	0.374532	14.519	0.0675284	1	0.257751	1	RAF1;
MEK activation	1	7	0.374532	10.3766	0.0932498	1	0.335941	1	RAF1;
RAF phosphorylates MEK	1	7	0.374532	10.3766	0.0932498	1	0.335941	1	RAF1;
Activation of CaMK IV	1	5	0.374532	14.519	0.0675284	1	0.257751	1	CAMK4;
Abortive elongation of HIV-1 transcript in the absence of Tat	1	23	0.374532	3.16123	0.275134	1	0.829878	1	GTF2F1;
Formation of the HIV-1 Early Elongation Complex	1	32	0.374532	2.27242	0.360956	1	1	1	GTF2F1;
HIV-1 Transcription Initiation	1	39	0.374532	1.86465	0.420642	1	1	1	GTF2F1;
RNA Polymerase II HIV-1 Promoter Escape	1	39	0.374532	1.86465	0.420642	1	1	1	GTF2F1;
RNA Pol II CTD phosphorylation and interaction with CE	1	26	0.374532	2.79662	0.304946	1	0.91156	1	GTF2F1;
Signalling to STAT3	1	3	0.374532	24.1661	0.0410801	1	0.167126	0.737563	NTRK1;
Retrograde neurotrophin signalling	1	11	0.374532	6.60672	0.142591	1	0.467274	1	NTRK1;
Signal attenuation	1	11	0.374532	6.60672	0.142591	1	0.467274	1	MAPK3;
PDE3B signalling	1	3	0.374532	24.1661	0.0410801	1	0.167126	0.737563	AKT2;
Inhibition of TSC complex formation by PKB	1	3	0.374532	24.1661	0.0410801	1	0.167126	0.737563	AKT2;
Regulation of Rheb GTPase activity by AMPK	1	10	0.374532	7.26673	0.130513	1	0.432793	1	PRKAA2;
TRKA activation by NGF	1	2	0.374532	36.1891	0.027577	1	0.118248	0.521855	NTRK1;
FGFR3 ligand binding and activation	1	2	0.374532	36.1891	0.027577	1	0.118248	0.521855	FGFR3;
FGFR3b ligand binding and activation	1	2	0.374532	36.1891	0.027577	1	0.118248	0.521855	FGFR3;
FGFR3c ligand binding and activation	1	2	0.374532	36.1891	0.027577	1	0.118248	0.521855	FGFR3;
FGFR1 ligand binding and activation	1	7	0.374532	10.3766	0.0932498	1	0.335941	1	FGFR1;
FGFR1c ligand binding and activation	1	2	0.374532	36.1891	0.027577	1	0.118248	0.521855	FGFR1;
AKT phosphorylates targets in the nucleus	1	4	0.374532	18.1397	0.0543964	1	0.215518	0.951129	AKT1;
Negative regulation of the PI3K/AKT network	1	5	0.374532	14.519	0.0675284	1	0.257751	1	AKT1;
EGFR downregulation	1	27	0.374532	2.69308	0.31461	1	0.935418	1	EGFR;
FGFR1c and Klotho ligand binding and activation	1	3	0.374532	24.1661	0.0410801	1	0.167126	0.737563	FGFR1;
Klotho-mediated ligand binding	1	6	0.374532	12.1032	0.0804787	1	0.295679	1	FGFR1;
CaMK IV-mediated phosphorylation of CREB	1	5	0.374532	14.519	0.0675284	1	0.257751	1	CAMK4;
APC/C:Cdc20 mediated degradation of Cyclin B	1	22	0.374532	3.30486	0.264916	1	0.806349	1	CDK1;
APC/C:Cdh1 mediated degradation of Cdc20 and other APC/C:Cdh1 targeted proteins in late mitosis/early G1	1	69	0.374532	1.05405	0.619576	1	1	1	AURKB;
Recruitment of NuMA to mitotic centrosomes	1	12	0.374532	6.05662	0.154503	1	0.501383	1	CDK1;
Phosphorylation of Emi1	1	20	0.374532	3.63518	0.244047	1	0.755233	1	CDK1;
APC/C:Cdc20 mediated degradation of mitotic proteins	1	71	0.374532	1.02436	0.630105	1	1	1	CDK1;
Phosphorylation of the APC/C	1	18	0.374532	4.03887	0.222588	1	0.693977	1	CDK1;
Activation of APC/C and APC/C:Cdc20 mediated degradation of mitotic proteins	1	72	0.374532	1.01014	0.63526	1	1	1	CDK1;
Ubiquitin-dependent degradation of Cyclin D	1	66	0.374532	1.10195	0.603221	1	1	1	CDK4;
Ubiquitin-dependent degradation of Cyclin D1	1	66	0.374532	1.10195	0.603221	1	1	1	CDK4;
G2 Phase	1	3	0.374532	24.1661	0.0410801	1	0.167126	0.737563	CDK2;
Phosphorylation of proteins involved in the G2/M transition by Cyclin A:Cdc2 complexes	1	3	0.374532	24.1661	0.0410801	1	0.167126	0.737563	CDK1;
E2F-enabled inhibition of pre-replication complex formation	1	10	0.374532	7.26673	0.130513	1	0.432793	1	CDK1;
E2F mediated regulation of DNA replication	1	28	0.374532	2.59693	0.32414	1	0.958626	1	CDK1;
G1/S-Specific Transcription	1	15	0.374532	4.8461	0.189257	1	0.600155	1	CDK1;
Phosphorylation of proteins involved in G1/S transition by active Cyclin E:Cdk2 complexes	1	4	0.374532	18.1397	0.0543964	1	0.215518	0.951129	CDK2;
SCF(Skp2)-mediated degradation of p27/p21	1	67	0.374532	1.08551	0.608749	1	1	1	CDK2;
mRNA Splicing - Minor Pathway	1	42	0.374532	1.73149	0.44449	1	1	1	GTF2F1;
mRNA Splicing - Major Pathway	1	107	0.374532	0.67975	0.77692	1	1	1	GTF2F1;
mRNA Splicing	1	107	0.374532	0.67975	0.77692	1	1	1	GTF2F1;
Processing of Capped Intron-Containing Pre-mRNA	1	138	0.374532	0.527063	0.855785	1	1	1	GTF2F1;
mRNA Capping	1	28	0.374532	2.59693	0.32414	1	0.958626	1	GTF2F1;
mRNA Processing	1	157	0.374532	0.463283	0.889657	1	1	1	GTF2F1;
Removal of licensing factors from origins	1	85	0.374532	0.855664	0.696107	1	1	1	CDK2;
Regulation of DNA replication	1	88	0.374532	0.826497	0.708645	1	1	1	CDK2;
Synthesis of DNA	1	109	0.374532	0.667278	0.783106	1	1	1	CDK2;
Switching of origins to a post-replicative state	1	83	0.374532	0.87628	0.68745	1	1	1	CDK2;
Orc1 removal from chromatin	1	83	0.374532	0.87628	0.68745	1	1	1	CDK2;
CDK-mediated phosphorylation and removal of Cdc6	1	66	0.374532	1.10195	0.603221	1	1	1	CDK2;
Signaling by VEGF	1	5	0.374532	14.519	0.0675284	1	0.257751	1	FLT4;
VEGF ligand-receptor interactions	1	5	0.374532	14.519	0.0675284	1	0.257751	1	FLT4;
VEGF binds to VEGFR leading to receptor dimerization	1	3	0.374532	24.1661	0.0410801	1	0.167126	0.737563	FLT4;
Phosphorylation of CD3 and TCR zeta chains	1	9	0.374532	8.07325	0.118264	1	0.399322	1	LCK;
RNA Polymerase II Transcription Initiation And Promoter Clearance	1	39	0.374532	1.86465	0.420642	1	1	1	GTF2F1;
RNA Polymerase II Transcription Initiation	1	39	0.374532	1.86465	0.420642	1	1	1	GTF2F1;
RNA Polymerase II Transcription Pre-Initiation And Promoter Opening	1	39	0.374532	1.86465	0.420642	1	1	1	GTF2F1;
Formation of the Early Elongation Complex	1	32	0.374532	2.27242	0.360956	1	1	1	GTF2F1;
RNA Polymerase II Promoter Escape	1	39	0.374532	1.86465	0.420642	1	1	1	GTF2F1;
RNA Pol II CTD phosphorylation and interaction with CE - 11	1	26	0.374532	2.79662	0.304946	1	0.91156	1	GTF2F1;
DNA Repair	1	106	0.374532	0.686162	0.773762	1	1	1	CHEK1;
Sphingolipid metabolism	1	29	0.374532	2.50741	0.333537	1	0.979472	1	PRKD1;
Homologous Recombination Repair	1	22	0.374532	3.30486	0.264916	1	0.806349	1	CHEK1;
Double-Strand Break Repair	1	27	0.374532	2.69308	0.31461	1	0.935418	1	CHEK1;
ATM mediated response to DNA double-strand break	1	6	0.374532	12.1032	0.0804787	1	0.295679	1	CHEK1;
Homologous recombination repair of replication-independent double-strand breaks	1	22	0.374532	3.30486	0.264916	1	0.806349	1	CHEK1;
ATM mediated phosphorylation of repair proteins	1	6	0.374532	12.1032	0.0804787	1	0.295679	1	CHEK1;
eNOS activation	1	9	0.374532	8.07325	0.118264	1	0.399322	1	AKT1;
Stabilization of p53	1	69	0.374532	1.05405	0.619576	1	1	1	CHEK1;
Autodegradation of the E3 ubiquitin ligase COP1	1	68	0.374532	1.06955	0.614201	1	1	1	CHEK1;
G2/M DNA replication checkpoint	1	4	0.374532	18.1397	0.0543964	1	0.215518	0.951129	CDK1;
Ubiquitin Mediated Degradation of Phosphorylated Cdc25A	1	69	0.374532	1.05405	0.619576	1	1	1	CHEK1;
Inhibition of PKR	1	1	0.374532	72.0198	0.0138846	1	0.0656075	0.28954	EIF2AK2;
NS1 Mediated Effects on Host Pathways	1	3	0.374532	24.1661	0.0410801	1	0.167126	0.737563	EIF2AK2;
Host Interactions with Influenza Factors	1	5	0.374532	14.519	0.0675284	1	0.257751	1	EIF2AK2;
Influenza Viral RNA Transcription and Replication	1	98	0.374532	0.742169	0.746835	1	1	1	GTF2F1;
Viral Messenger RNA Synthesis	1	14	0.374532	5.19201	0.177834	1	0.565003	1	GTF2F1;
Influenza Life Cycle	1	135	0.374532	0.538775	0.849562	1	1	1	GTF2F1;
Inhibition of HSL	1	3	0.374532	24.1661	0.0410801	1	0.167126	0.737563	AKT2;
Regulation of gap junction activity	1	2	0.374532	36.1891	0.027577	1	0.118248	0.521855	SRC;
c-src mediated regulation of Cx43 function and closure of gap junctions	1	2	0.374532	36.1891	0.027577	1	0.118248	0.521855	SRC;
Gap junction trafficking and regulation	1	6	0.374532	12.1032	0.0804787	1	0.295679	1	SRC;
Membrane Trafficking	1	84	0.374532	0.865849	0.691809	1	1	1	SRC;
Regulation of Insulin Secretion by Acetylcholine	1	3	0.374532	24.1661	0.0410801	1	0.167126	0.737563	PRKCA;
Stabilization of mRNA by HuR	1	8	0.374532	9.08115	0.105844	1	0.373252	1	PRKCA;
Destabilization of mRNA by Butyrate Response Factor 1 (BRF1)	1	20	0.374532	3.63518	0.244047	1	0.755233	1	AKT1;
BMAL1:CLOCK/NPAS2 Activates Gene Expression	1	23	0.374532	3.16123	0.275134	1	0.829878	1	NR3C1;
Circadian Clock	1	32	0.374532	2.27242	0.360956	1	1	1	NR3C1;
Import of palmitoyl-CoA into the mitochondrial matrix	1	8	0.374532	9.08115	0.105844	1	0.373252	1	PRKAA2;
Fatty acid, triacylglycerol, and ketone body metabolism	1	83	0.374532	0.87628	0.68745	1	1	1	PRKAA2;
Glycogen breakdown (glycogenolysis)	1	14	0.374532	5.19201	0.177834	1	0.565003	1	PHKG2;
Cell junction organization	1	69	0.374532	1.05405	0.619576	1	1	1	TESK1;
Regulation of cytoskeletal remodeling and cell spreading by IPP complex components	1	8	0.374532	9.08115	0.105844	1	0.373252	1	TESK1;
Cell-extracellular matrix interactions	1	16	0.374532	4.54341	0.200523	1	0.632273	1	TESK1;
DSCAM interactions	1	9	0.374532	8.07325	0.118264	1	0.399322	1	MAPK14;
Nephrin interactions	1	29	0.374532	2.50741	0.333537	1	0.979472	1	FYN;
PD-1 signaling	1	12	0.374532	6.05662	0.154503	1	0.501383	1	LCK;
RNA Polymerase I, RNA Polymerase III, and Mitochondrial Transcription	1	92	0.374532	0.790566	0.724565	1	1	1	MAPK3;
RNA Polymerase I Transcription	1	56	0.374532	1.2987	0.543476	1	1	1	MAPK3;
RNA Polymerase I Promoter Clearance	1	54	0.374532	1.34679	0.530492	1	1	1	MAPK3;
Regulation of Apoptosis	1	75	0.374532	0.969738	0.650299	1	1	1	DAPK1;
Role of DCC in regulating apoptosis	1	8	0.374532	9.08115	0.105844	1	0.373252	1	DAPK1;
RNA Polymerase I Promoter Opening	1	31	0.374532	2.3457	0.351944	1	1	1	MAPK3;
Cdc20:Phospho-APC/C mediated degradation of Cyclin A	1	69	0.374532	1.05405	0.619576	1	1	1	CDK1;
Caspase-mediated cleavage of cytoskeletal proteins	1	11	0.374532	6.60672	0.142591	1	0.467274	1	MAPT;
Caspase-8 is formed from procaspase-8	1	9	0.374532	8.07325	0.118264	1	0.399322	1	RIPK1;
Intrinsic Pathway for Apoptosis	1	31	0.374532	2.3457	0.351944	1	1	1	AKT1;
Activation of Pro-Caspase 8	1	9	0.374532	8.07325	0.118264	1	0.399322	1	RIPK1;
Activation of BH3-only proteins	1	17	0.374532	4.27631	0.211633	1	0.66354	1	AKT1;
Activation of BAD and translocation to mitochondria	1	7	0.374532	10.3766	0.0932498	1	0.335941	1	AKT1;
TNF signaling	1	7	0.374532	10.3766	0.0932498	1	0.335941	1	RIPK1;
Death Receptor Signalling	1	13	0.374532	5.59108	0.16625	1	0.534305	1	RIPK1;
Extrinsic Pathway for Apoptosis	1	13	0.374532	5.59108	0.16625	1	0.534305	1	RIPK1;
Interleukin-6 signaling	1	8	0.374532	9.08115	0.105844	1	0.373252	1	JAK1;
Viral dsRNA:TLR3:TRIF Complex Activates TBK1/IKK epsilon	1	6	0.374532	12.1032	0.0804787	1	0.295679	1	TBK1;
TRAF6 mediated IRF7 activation in TLR7/8 or 9 signaling	1	8	0.374532	9.08115	0.105844	1	0.373252	1	IRAK1;
Activation of IRF3/IRF7 mediated by TBK1/IKK epsilon	1	9	0.374532	8.07325	0.118264	1	0.399322	1	TBK1;
Rap1 signalling	1	10	0.374532	7.26673	0.130513	1	0.432793	1	RAF1;
Activation of the AP-1 family of transcription factors	1	9	0.374532	8.07325	0.118264	1	0.399322	1	MAPK14;
Advanced glycosylation endproduct receptor signaling	1	9	0.374532	8.07325	0.118264	1	0.399322	1	MAPK3;
TRAF3-dependent IRF activation pathway	1	10	0.374532	7.26673	0.130513	1	0.432793	1	TBK1;
TRAF6 mediated IRF7 activation	1	25	0.374532	2.90844	0.295147	1	0.887036	1	TBK1;
Negative regulators of RIG-I/MDA5 signaling	1	28	0.374532	2.59693	0.32414	1	0.958626	1	TBK1;
Interferon gamma signaling	1	47	0.374532	1.54733	0.482083	1	1	1	JAK1;
Regulation of IFNG signaling	1	13	0.374532	5.59108	0.16625	1	0.534305	1	JAK1;
Regulation of signaling by CBL	1	6	0.374532	12.1032	0.0804787	1	0.295679	1	FYN;
TRAF6 mediated induction of TAK1 complex	1	14	0.374532	5.19201	0.177834	1	0.565003	1	MAP3K7;
glycine cleavage complex	1	5	0.374532	14.519	0.0675284	1	0.257751	1	OCA2;
Circadian rhythm pathway	1	16	0.374532	4.54341	0.200523	1	0.632273	1	CHEK1;
Visual signal transduction: Cones	1	23	0.374532	3.16123	0.275134	1	0.829878	1	GRK7;
HIF-1-alpha transcription factor network	1	66	0.374532	1.10195	0.603221	1	1	1	AKT1;
Fanconi anemia pathway	1	48	0.374532	1.5151	0.489291	1	1	1	CHEK1;
BARD1 signaling events	1	29	0.374532	2.50741	0.333537	1	0.979472	1	CDK2;
a4b7 Integrin signaling	1	9	0.374532	8.07325	0.118264	1	0.399322	1	PTK2;
Validated nuclear estrogen receptor alpha network	1	64	0.374532	1.13639	0.59193	1	1	1	CHUK;
Rapid glucocorticoid signaling	1	9	0.374532	8.07325	0.118264	1	0.399322	1	MAPK14;
S1P4 pathway	1	14	0.374532	5.19201	0.177834	1	0.565003	1	MAPK3;
Hypoxic and oxygen homeostasis regulation of HIF-1-alpha	1	80	0.374532	0.909136	0.674003	1	1	1	AKT1;
PLK3 signaling events	1	5	0.374532	14.519	0.0675284	1	0.257751	1	CDC25C;
Ephrin A reverse signaling	1	3	0.374532	24.1661	0.0410801	1	0.167126	0.737563	FYN;
FOXA1 transcription factor network	1	44	0.374532	1.65281	0.459843	1	1	1	AR;
Beta5 beta6 beta7 and beta8 integrin cell surface interactions	1	17	0.374532	4.27631	0.211633	1	0.66354	1	TGFBR1;
Calcium signaling in the CD4+ TCR pathway	1	29	0.374532	2.50741	0.333537	1	0.979472	1	PRKACA;
NOTCH	1	57	0.374532	1.27592	0.549833	1	1	1	MAPK3;
						Corrected p-values

## Sheet: Protein domain
Analysis: Protein domain
Dataset name: Client proteins of Hsp90-Cdc37
Number of genes in the dataset: 267
Number of genes in the dataset (which are available in Protein domain database) :251
Number of genes in background: 19230
Is analysis quantitative: No
						Corrected p-values
Protein domain	No. of genes in the dataset	No.of genes in the background dataset	Percentage of genes	Fold enrichment	P-value (Hypergeometric test)	Bonferroni method	BH method	Q-value (Storey-Tibshirani method)
coiled coil region	35	2968	13.1086	0.84953	0.875247	1	1	1	AR; BRAF; CDK11A; CDK11B; DAPK2; DAPK3; DMPK; EIF2AK1; FER; FES; GTF2F1; JAK1; KSR2; LIMK2; MAP2K7; MAP3K11; MAP3K12; MAP3K15; MAP3K5; MAP3K6; MAP3K7; MAP3K9; MAP4K4; MAPK7; MINK1; NEK11; PRKG2; PTK2B; RIPK1; SLK; STK3; TAOK3; TNNI3K; TTK; ZGPAT;
signal peptide	44	3668	16.4794	0.864118	0.879346	1	1	1	ACVR1; ACVR1B; ACVR1C; ACVR2B; ALK; AMHR2; AXL; BMPR1A; CSF1R; DDR1; DDR2; EGFR; EPHA1; EPHA10; EPHA2; EPHA4; EPHB1; EPHB6; ERBB2; ERBB3; ERBB4; ERN1; FGFR1; FGFR3; FLT4; IGF1R; INSRR; IRAK3; KIT; MAP3K9; MERTK; MUSK; NPR2; NTRK1; PDGFRA; PDGFRB; PRKD1; RET; ROR2; RYK; TGFBR1; TGFBR2; TIE1; TYRO3;
transmembrane domain	40	4771	14.9813	0.603963	0.999971	1	1	1	ACVR1; ACVR1B; ACVR1C; ACVR2B; AMHR2; AXL; BMPR1A; CSF1R; DDR1; DDR2; EGFR; EPHA1; EPHA2; EPHA4; EPHB1; EPHB6; ERBB2; ERBB3; FGFR1; FGFR3; FLT3; FLT4; IGF1R; INSRR; KIT; MERTK; MUSK; NTRK1; NTRK2; NTRK3; OCA2; PDGFRA; PDGFRB; ROR2; RYK; STYK1; TGFBR1; TGFBR2; TIE1; TYRO3;
IG	13	340	4.86891	2.75574	0.000987008	0.957398	0.0531888	0.342812	AXL; CSF1R; FGFR3; FLT3; FLT4; KIT; MERTK; NTRK1; NTRK3; PDGFRA; PDGFRB; TIE1; TYRO3;
ZnF_C2H2	8	799	2.99625	0.721992	0.869895	1	1	1	DPF1; TUT1; ZBTB40; ZNF334; ZNF569; ZNF587; ZNF610; ZNF843;
CA	1	114	0.374532	0.638014	0.797834	1	1	1	RET;
S_TKc	152	307	56.9288	35.6592	6.6858e-216	6.48522e-213	6.48522e-213	4.17985e-212	ACVR1B; ACVR1C; ADRBK1; AKT1; AKT2; AKT3; AURKB; AURKC; BMP2K; CAMK1G; CAMK2A; CAMK2B; CAMK2D; CAMK2G; CAMK4; CAMKK1; CAMKK2; CAMKV; CDK1; CDK10; CDK11A; CDK11B; CDK14; CDK15; CDK17; CDK18; CDK19; CDK2; CDK20; CDK4; CDK6; CDK9; CDKL4; CHEK1; CHUK; CLK2; CLK3; CSNK1D; CSNK2A1; DAPK1; DAPK2; DAPK3; DCLK2; DMPK; DSTYK; DYRK1A; DYRK1B; DYRK2; DYRK4; EIF2AK1; EIF2AK2; GRK4; GRK6; GRK7; GSK3A; HIPK4; I…
RRM	3	221	1.1236	0.980859	0.594957	1	1	1	TARDBP; TUT1; UHMK1;
RING	2	311	0.749064	0.465451	0.931991	1	1	1	DPF1; MAP3K1;
SH3	19	216	7.1161	6.33812	1.92864e-10	1.87078e-07	2.67254e-08	1.7225e-07	ABL1; BLK; BTK; FGR; FRK; FYN; HCK; ITK; LCK; LYN; MAP3K11; MAP3K9; MATK; PTK6; SRC; TNK1; TNK2; VAV3; YES1;
CH	1	66	0.374532	1.10195	0.603221	1	1	1	VAV3;
LRRNT	2	99	0.749064	1.46207	0.400592	1	1	1	NTRK2; NTRK3;
LRR	1	233	0.374532	0.312175	0.962286	1	1	1	LRRK2;
LRR_TYP	1	132	0.374532	0.551019	0.843071	1	1	1	LRRK2;
LRRCT	3	90	1.1236	2.4084	0.12986	1	1	1	NTRK1; NTRK2; NTRK3;
IGc2	11	211	4.11985	3.75782	0.000185148	0.179594	0.0116442	0.075049	CSF1R; FGFR1; FGFR3; FLT4; KIT; MUSK; NTRK2; PDGFRA; PDGFRB; ROR2; TYRO3;
IG_like	6	128	2.24719	3.38129	0.00898554	1	0.33523	1	CSF1R; FGFR3; FLT3; KIT; PDGFRA; TIE1;
ANK	2	249	0.749064	0.581341	0.863118	1	1	1	DAPK1; TNNI3K;
FN3	12	187	4.49438	4.6252	1.24256e-05	0.0120528	0.00109571	0.00706205	AXL; EPHA1; EPHA10; EPHA2; EPHA4; EPHB1; EPHB6; IGF1R; INSRR; MERTK; TIE1; TYRO3;
BTB	1	179	0.374532	0.406346	0.919096	1	1	1	ZBTB40;
KRAB	4	376	1.49813	0.768063	0.769371	1	1	1	ZNF334; ZNF569; ZNF587; ZNF610;
PAS	1	32	0.374532	2.27242	0.360956	1	1	1	PASK;
ZnF_C4	2	46	0.749064	3.14627	0.133783	1	1	1	AR; NR3C1;
HOLI	2	48	0.749064	3.0152	0.143275	1	1	1	AR; NR3C1;
WD40	1	269	0.374532	0.270399	0.977354	1	1	1	LRRK2;
RGS	4	35	1.49813	8.24906	0.00135605	1	0.0692297	0.446199	ADRBK1; GRK4; GRK6; GRK7;
EGF	1	208	0.374532	0.349695	0.946287	1	1	1	TIE1;
EGF_like	1	87	0.374532	0.835996	0.704524	1	1	1	TIE1;
KR	1	16	0.374532	4.54341	0.200523	1	1	1	ROR2;
FA58C	2	20	0.749064	7.23437	0.0309564	1	0.938367	1	DDR1; DDR2;
IQ	1	84	0.374532	0.865849	0.691809	1	1	1	MYO3B;
HOX	3	234	1.1236	0.926369	0.633574	1	1	1	LMX1B; PITX2; VSX2;
PDZ	3	150	1.1236	1.4451	0.345916	1	1	1	LIMK1; LIMK2; MAST2;
B41	4	51	1.49813	5.66162	0.00544356	1	0.228712	1	JAK1; PTK2; PTK2B; TYK2;
PH	10	278	3.74532	2.59314	0.00565885	1	0.228712	1	ADRBK1; AKT1; AKT2; AKT3; BMX; BTK; ITK; PRKD1; PRKD2; VAV3;
RHOD	1	22	0.374532	3.30486	0.264916	1	1	1	CDC25C;
S_TK_X	32	56	11.985	41.1597	1.76272e-45	1.70984e-42	5.69946e-43	3.67341e-42	ADRBK1; AKT1; AKT2; AKT3; DMPK; GRK4; GRK6; GRK7; MAST2; PKN1; PKN2; PRKACA; PRKACG; PRKCA; PRKCB; PRKCE; PRKCG; PRKCH; PRKCQ; PRKCZ; PRKG2; PRKX; RPS6KA1; RPS6KA2; RPS6KA3; RPS6KA4; RPS6KA5; RPS6KA6; SGK2; SGK3; STK38; STK38L;
C2	7	138	2.62172	3.65813	0.00318617	1	0.147171	0.948544	PKN1; PKN2; PRKCA; PRKCB; PRKCE; PRKCG; PRKCH;
RBD	3	7	1.1236	30.9243	8.88939e-05	0.0862271	0.00615908	0.0396965	ARAF; BRAF; RAF1;
LIM	3	73	1.1236	2.96918	0.0811688	1	1	1	LIMK1; LIMK2; LMX1B;
SH2	21	111	7.86517	13.6306	3.40368e-18	3.30157e-15	6.60314e-16	4.25585e-15	ABL1; BLK; BMX; BTK; FER; FES; FGR; FRK; FYN; HCK; ITK; JAK1; LCK; LYN; MATK; PTK6; SRC; TYK2; VAV3; YES1; ZAP70;
TyrKc	59	88	22.0974	48.2887	3.02416e-90	2.93343e-87	1.46672e-87	9.45327e-87	ABL1; ALK; AXL; BLK; BMX; BTK; CSF1R; DDR1; DDR2; EGFR; EPHA1; EPHA10; EPHA2; EPHA4; EPHB1; ERBB2; ERBB3; ERBB4; FER; FES; FGFR1; FGFR3; FGR; FLT3; FLT4; FRK; FYN; HCK; IGF1R; INSRR; ITK; JAK1; KIT; LCK; LYN; MAP3K11; MAP3K9; MATK; MERTK; MUSK; NTRK1; NTRK2; NTRK3; PDGFRA; PDGFRB; PTK2; PTK2B; PTK6; RET; ROR2; RYK; SRC; TIE1; TNK1; TNK2; TYK2; TYRO3; YES1; ZAP70;
PB1	4	14	1.49813	20.6138	3.25985e-05	0.0316205	0.00243235	0.0156769	MAP2K5; MAP3K2; MAP3K3; PRKCZ;
MIT	1	10	0.374532	7.26673	0.130513	1	1	1	RPS6KC1;
STYKc	18	48	6.74157	27.0168	1.04101e-21	1.00978e-18	2.52444e-19	1.62705e-18	AMHR2; BTK; CDK1; EPHB6; IRAK3; JAK1; LIMK1; LIMK2; MAP3K9; PAK6; PASK; PDPK1; RPS6KA5; RPS6KC1; STK3; TESK2; TNNI3K; TYK2;
DEATH	3	27	1.1236	8.0259	0.00605105	1	0.234781	1	DAPK1; IRAK3; RIPK1;
DSRM	1	20	0.374532	3.63518	0.244047	1	1	1	EIF2AK2;
PHD	1	92	0.374532	0.790566	0.724565	1	1	1	DPF1;
CYCc	1	18	0.374532	4.03887	0.222588	1	1	1	NPR2;
SAM	6	92	2.24719	4.70426	0.00178222	1	0.0864376	0.557107	EPHA1; EPHA10; EPHA2; EPHA4; EPHB1; EPHB6;
PX	2	45	0.749064	3.21617	0.129093	1	1	1	RPS6KC1; SGK3;
FCH	2	20	0.749064	7.23437	0.0309564	1	0.938367	1	FER; FES;
ZnF_C3H1	1	44	0.374532	1.65281	0.459843	1	1	1	ZGPAT;
small_GTPase	1	35	0.374532	2.07769	0.387252	1	1	1	LRRK2;
C1	15	67	5.61798	16.1322	1.68193e-14	1.63147e-11	2.71912e-12	1.75252e-11	ARAF; BRAF; KSR1; KSR2; PRKCA; PRKCB; PRKCE; PRKCG; PRKCH; PRKCQ; PRKCZ; PRKD1; PRKD2; RAF1; VAV3;
MYSc	1	38	0.374532	1.91371	0.412469	1	1	1	MYO3B;
CARD	1	17	0.374532	4.27631	0.211633	1	1	1	RIPK2;
RhoGEF	1	67	0.374532	1.08551	0.608749	1	1	1	VAV3;
LDLa	1	47	0.374532	1.54733	0.482083	1	1	1	ALK;
cNMP	1	34	0.374532	2.13878	0.378609	1	1	1	PRKG2;
FABD	1	2	0.374532	36.1891	0.027577	1	0.891658	1	ABL1;
ETS	1	28	0.374532	2.59693	0.32414	1	1	1	ELK3;
PBD	2	14	0.749064	10.3326	0.0156564	1	0.542384	1	PAK6; PAK7;
CNH	4	13	1.49813	22.1983	2.35413e-05	0.022835	0.00190292	0.0122647	MAP4K1; MAP4K2; MAP4K4; MINK1;
G_patch	1	23	0.374532	3.16123	0.275134	1	1	1	ZGPAT;
PQQ	1	6	0.374532	12.1032	0.0804787	1	1	1	ERN1;
EPH_lbd	6	14	2.24719	30.895	1.85301e-08	1.79742e-05	1.99713e-06	1.28719e-05	EPHA1; EPHA10; EPHA2; EPHA4; EPHB1; EPHB6;
FU	6	18	2.24719	24.0333	1.0932e-07	0.00010604	1.0604e-05	6.8345e-05	EGFR; ERBB2; ERBB3; ERBB4; IGF1R; INSRR;
BTK	3	9	1.1236	24.0599	0.000208987	0.202717	0.0119245	0.076856	BMX; BTK; ITK;
UBA	1	32	0.374532	2.27242	0.360956	1	1	1	SIK1;
MADS	1	6	0.374532	12.1032	0.0804787	1	1	1	MEF2B;
GS	5	7	1.87266	51.4721	1.02053e-08	9.89919e-06	1.2374e-06	7.97527e-06	ACVR1; ACVR1B; ACVR1C; BMPR1A; TGFBR1;
RAP	1	6	0.374532	12.1032	0.0804787	1	1	1	FASTK;
DCX	1	7	0.374532	10.3766	0.0932498	1	1	1	DCLK2;
PUG	1	5	0.374532	14.519	0.0675284	1	1	1	ERN1;
Hr1	2	7	0.749064	20.6505	0.00385192	1	0.169835	1	PKN1; PKN2;
WIF	1	2	0.374532	36.1891	0.027577	1	0.891658	1	RYK;
IKKbetaNEMObind	2	2	0.749064	72.0198	0.000192069	0.186307	0.0116442	0.075049	CHUK; IKBKB;
DUF3635	1	1	0.374532	72.0198	0.0138846	1	0.498816	1	GSG2;

## Sheet: Site of expression
Analysis: Site of expression
Dataset name: Client proteins of Hsp90-Cdc37
Number of genes in the dataset: 267
Number of genes in the dataset (which are available in Site of expression database) :267
Number of genes in background: 19230
Is analysis quantitative: No
						Corrected p-values
Site of expression	No. of genes in the dataset	No.of genes in the background dataset	Percentage of genes	Fold enrichment	P-value (Hypergeometric test)	Bonferroni method	BH method	Q-value (Storey-Tibshirani method)
T cells	24	1726	8.98876	1.00185	0.528521	1	1	1	ADRBK1; ARAF; BLK; BTK; CAMK2G; CDK4; CDK6; CDK9; CSNK2A1; EIF2AK2; FYN; GRK6; GTF2F1; ITK; LCK; LYN; MATK; NOC4L; PRKACA; PTK2; RPS6KA3; STK38; TARDBP; ZGPAT;
Monocyte	35	2842	13.1086	0.887194	0.804099	1	1	1	ADRBK1; AKT2; AR; ARAF; CAMK2B; CAMK2D; CDK1; CSF1R; CSNK2A1; DSTYK; EGFR; EIF2AK2; ERBB2; FLT4; IGF1R; IKBKB; LCK; LYN; MAPK14; MOS; NEK9; PKN1; PRKACA; PRKCB; PRKCG; RPS6KA3; SLK; SRC; STK38; TAOK3; TARDBP; TGFBR2; TUT1; YES1; ZAP70;
MDA468	4	760	1.49813	0.379994	0.994114	1	1	1	DDR1; EGFR; PTK2; TUT1;
Small intestine	185	8360	69.2884	1.59382	9.02242e-18	7.65101e-15	1.21445e-16	5.74148e-16	ABL1; ACVR1; ACVR1B; ACVR1C; ACVR2B; AKT1; AKT2; AKT3; ALK; AURKB; BMP2K; BMPR1A; BMX; BRAF; BTK; CAMK1G; CAMK2A; CAMK2B; CAMK2D; CAMK4; CAMKK1; CAMKK2; CAMKV; CDC25C; CDC7; CDK1; CDK11A; CDK11B; CDK14; CDK15; CDK17; CDK19; CDK2; CDK20; CDK4; CDK6; CDK9; CHEK1; CHUK; CSF1R; CSNK1D; CSNK2A1; DCLK2; DDR1; DMPK; DYRK1A; DYRK2; DYRK4; EGFR; EIF2AK1; EIF2AK2; ELK3; EPHA1; EPHA10; EPHA2; EPHA4; EPHB6; …
Breast cancer	183	7467	68.5393	1.76514	4.59295e-23	3.89482e-20	1.49801e-21	7.08207e-21	ABL1; ACVR1; ACVR1B; ACVR1C; ACVR2B; AKT1; AKT2; AKT3; ALK; AR; AURKB; BLK; BMP2K; BMPR1A; BMX; BRAF; BTK; CAMK1G; CAMK2A; CAMK2B; CAMK2D; CAMK4; CAMKK1; CAMKK2; CAMKV; CDC25C; CDC7; CDK1; CDK11A; CDK11B; CDK14; CDK15; CDK17; CDK19; CDK2; CDK20; CDK4; CDK6; CDK9; CHUK; CSF1R; CSNK1D; CSNK2A1; DCLK2; DDR1; DMPK; DYRK1A; DYRK2; DYRK4; EGFR; EIF2AK1; EIF2AK2; ELK3; EPHA1; EPHA2; EPHA4; EPHB6; ERBB2;…
Thyroid cancer	179	7281	67.0412	1.77067	2.4579e-22	2.0843e-19	6.72355e-21	3.17866e-20	ABL1; ACVR1; ACVR1B; ACVR1C; ACVR2B; AKT1; AKT2; AKT3; ALK; AURKB; BMP2K; BMPR1A; BMX; BRAF; BTK; CAMK1G; CAMK2A; CAMK2B; CAMK2D; CAMK4; CAMKK1; CAMKK2; CAMKV; CDC25C; CDC7; CDK1; CDK11A; CDK11B; CDK14; CDK15; CDK17; CDK2; CDK20; CDK4; CDK6; CDK9; CHUK; CSF1R; CSNK1D; CSNK2A1; DCLK2; DDR1; DYRK1A; DYRK2; DYRK4; EGFR; EIF2AK1; EIF2AK2; ELK3; EPHA1; EPHA10; EPHA2; EPHA4; EPHB6; ERBB2; ERBB3; ERBB4;…
Colon	194	8429	72.6592	1.65768	7.16136e-22	6.07284e-19	1.64131e-20	7.75953e-20	ABL1; ACVR1; ACVR1B; ACVR1C; ACVR2B; AKT1; AKT2; AKT3; ALK; AR; AURKB; BMP2K; BMPR1A; BMX; BRAF; BTK; CAMK1G; CAMK2A; CAMK4; CAMKK1; CAMKK2; CAMKV; CDC25C; CDC7; CDK1; CDK10; CDK11A; CDK11B; CDK14; CDK15; CDK17; CDK19; CDK2; CDK20; CDK4; CDK6; CDK9; CHEK1; CHUK; CSF1R; CSNK1D; CSNK2A1; DAPK2; DCLK2; DDR1; DMPK; DYRK1A; DYRK1B; DYRK2; DYRK4; EGFR; EIF2AK1; EIF2AK2; EPHA1; EPHA10; EPHA2; EPHA4; EPH…
Parathyroid gland	153	5997	57.3034	1.83754	6.51016e-19	5.52061e-16	9.20102e-18	4.34993e-17	ABL1; ACVR1; ACVR1B; ACVR1C; ACVR2B; AKT1; AKT2; AKT3; ALK; AURKB; BMP2K; BMPR1A; BMX; BRAF; BTK; CAMK1G; CAMK2A; CAMK2B; CAMK4; CAMKK1; CAMKK2; CAMKV; CDC7; CDK1; CDK11B; CDK15; CDK17; CDK19; CDK20; CDK4; CDK6; CDK9; CHUK; CSF1R; CSNK1D; CSNK2A1; DCLK2; DDR1; DMPK; DYRK1A; DYRK2; DYRK4; EGFR; EIF2AK1; EIF2AK2; ELK3; EPHA1; EPHA10; EPHA2; EPHA4; ERBB2; ERBB3; ERBB4; ERN1; FASTK; FER; FES; FGFR1; …
Cervix, uterine	166	6391	62.1723	1.87075	2.06941e-22	1.75486e-19	5.84952e-21	2.76545e-20	ABL1; ACVR1; ACVR1B; ACVR1C; ACVR2B; AKT1; AKT2; AKT3; ALK; AR; BLK; BMP2K; BMPR1A; BMX; BRAF; BTK; CAMK1G; CAMK2A; CAMK2B; CAMK4; CAMKK1; CAMKK2; CAMKV; CDC25C; CDC7; CDK1; CDK11A; CDK11B; CDK14; CDK15; CDK17; CDK19; CDK2; CDK20; CDK4; CDK6; CDK9; CHUK; CSF1R; CSNK1D; CSNK2A1; DCLK2; DDR1; DYRK1A; DYRK2; DYRK4; EGFR; EIF2AK1; EIF2AK2; ELK3; EPHA1; EPHA10; EPHA2; EPHB6; ERBB2; ERBB3; ERBB4; ERN1;…
Spleen	173	7887	64.794	1.57983	2.68855e-15	2.27989e-12	3.08093e-14	1.45656e-13	ABL1; ACVR1; ACVR1B; ACVR1C; AKT1; AKT2; AKT3; ALK; AURKB; BLK; BMP2K; BMX; BRAF; BTK; CAMK1G; CAMK2A; CAMK2B; CAMK4; CAMKK1; CAMKK2; CAMKV; CDC25C; CDC7; CDK1; CDK10; CDK11A; CDK11B; CDK14; CDK17; CDK19; CDK20; CDK4; CDK6; CDK9; CHEK1; CHUK; CSF1R; CSNK1D; CSNK2A1; DAPK2; DDR1; DYRK1A; DYRK4; EIF2AK1; EIF2AK2; EPHA1; EPHA2; EPHA4; ERBB2; ERBB3; ERBB4; ERN1; FASTK; FER; FES; FGFR1; FGR; FLT3; FLT…
HUVEC	232	13061	86.8914	1.27933	4.68982e-13	3.97697e-10	4.67879e-12	2.21197e-11	ABL1; ACVR1B; ACVR1C; AKT1; AKT2; AKT3; ALK; AMHR2; AR; ARAF; AURKB; AURKC; AXL; BLK; BMP2K; BMPR1A; BMX; BRAF; BTK; CAMK1G; CAMK2A; CAMK2B; CAMK2G; CAMK4; CAMKK1; CDC25C; CDC7; CDK11A; CDK11B; CDK14; CDK15; CDK17; CDK18; CDK19; CDK20; CDK4; CDK6; CHEK1; CHUK; CLK3; CSF1R; DAPK1; DAPK2; DAPK3; DCLK2; DDR1; DMPK; DSTYK; DUS3L; DYRK1A; DYRK2; DYRK4; EGFR; EIF2AK1; EIF2AK2; ELK3; EPHA1; EPHA10; EPHA…
Tonsils	180	7274	67.4157	1.78228	6.30666e-23	5.34805e-20	1.91002e-21	9.0299e-21	ABL1; ACVR1; ACVR1B; ACVR1C; AKT1; AKT2; AKT3; ALK; AURKB; BLK; BMP2K; BMPR1A; BMX; BRAF; BTK; CAMK1G; CAMK2A; CAMK4; CAMKK1; CAMKK2; CAMKV; CDC25C; CDC7; CDK1; CDK11A; CDK14; CDK15; CDK17; CDK19; CDK2; CDK20; CDK4; CDK6; CDK9; CHEK1; CHUK; CSF1R; CSNK1D; CSNK2A1; DCLK2; DDR1; DYRK1A; DYRK2; DYRK4; EGFR; EIF2AK1; EIF2AK2; ELK3; EPHA1; EPHA10; EPHA2; EPHA4; EPHB6; ERBB2; ERBB3; ERBB4; ERN1; FASTK;…
Jurkat A3	63	4200	23.5955	1.08047	0.263551	1	1	1	ABL1; AKT2; ARAF; BLK; BRAF; CAMK4; CAMKK2; CDK1; CDK2; CDK4; CDK6; CDK9; CHEK1; CHUK; CLK3; CSNK2A1; DSTYK; DUS3L; ERN1; FER; FYN; GRK6; GTF2F1; IKBKB; ITK; JAK1; LCK; MAP3K5; MAP3K9; MAP4K4; MAPK14; MAPK3; MAST2; MRPL28; NEK9; NOC4L; NRBP1; PASK; PRKCA; PRKCB; PRKCE; PRKCH; PRKCQ; PTK2; PTK2B; RAF1; RPS6KC1; SLK; SRC; STK11; STK3; STK36; STK38; TAOK3; TBK1; TNK1; TP53RK; TUT1; TYK2; ULK1; VAV3;…
Rectum	179	7113	67.0412	1.81249	1.20782e-23	1.02423e-20	5.69019e-22	2.69013e-21	ABL1; ACVR1; ACVR1B; ACVR1C; ACVR2B; AKT1; AKT2; AKT3; ALK; AURKB; BMP2K; BMPR1A; BMX; BRAF; BTK; CAMK1G; CAMK2A; CAMK2D; CAMK4; CAMKK1; CAMKK2; CAMKV; CDC25C; CDC7; CDK1; CDK11A; CDK11B; CDK14; CDK15; CDK17; CDK19; CDK2; CDK20; CDK4; CDK6; CDK9; CHUK; CSF1R; CSNK1D; CSNK2A1; DCLK2; DDR1; DMPK; DYRK1A; DYRK2; DYRK4; EGFR; EIF2AK1; EIF2AK2; EPHA1; EPHA10; EPHA2; EPHA4; EPHB6; ERBB2; ERBB3; ERBB4; …
Liver	213	11680	79.7753	1.31344	1.60705e-11	1.36278e-08	1.54862e-10	7.32132e-10	ABL1; ACVR1; ACVR1B; ACVR1C; AKT1; AKT2; AKT3; ALK; AR; AURKC; AXL; BLK; BMP2K; BMPR1A; BMX; BRAF; BTK; CAMK1G; CAMK2A; CAMK2B; CAMK2G; CAMK4; CAMKK1; CAMKK2; CAMKV; CDC7; CDK1; CDK10; CDK11A; CDK11B; CDK14; CDK15; CDK17; CDK19; CDK20; CDK4; CDK6; CDK9; CHUK; CSF1R; CSNK1D; CSNK2A1; DAPK2; DDR1; DDR2; DMPK; DYRK1A; DYRK1B; DYRK2; DYRK4; EGFR; EIF2AK1; EIF2AK2; ELK3; EPHA1; EPHA10; EPHA2; EPHA4; E…
CD4	15	1901	5.61798	0.568654	0.995736	1	1	1	CAMK2D; LCK; LYN; MAPK3; MOS; NEK9; PKN1; PRKACA; PRKCA; RPS6KA3; SLK; TARDBP; TP53RK; TUT1; ZAP70;
Skeletal muscles	178	9060	66.6667	1.41504	6.97746e-11	5.91688e-08	6.64818e-10	3.14303e-09	ABL1; ACVR1; ACVR1B; ACVR1C; AKT1; AKT2; AKT3; ALK; AURKB; BLK; BMP2K; BMPR1A; BMX; BRAF; BTK; CAMK1G; CAMK2A; CAMK2B; CAMK2D; CAMK2G; CAMK4; CAMKK1; CAMKV; CDC25C; CDC7; CDK11A; CDK11B; CDK14; CDK15; CDK19; CDK20; CDK4; CDK6; CDK9; CHUK; CSF1R; CSNK1D; CSNK2A1; DAPK2; DDR1; DDR2; DMPK; DSTYK; DYRK1A; DYRK1B; DYRK4; EGFR; EIF2AK1; EIF2AK2; ELK3; EPHA1; EPHA10; EPHA2; ERBB2; ERBB3; ERBB4; ERN1; FA…
H293	105	6792	39.3258	1.11348	0.0949882	1	0.506604	1	ABL1; ADRBK1; AKT1; AKT2; AKT3; ARAF; AURKB; BMP2K; BTK; CAMK2A; CAMK2B; CAMK2D; CAMK2G; CAMK4; CAMKK1; CDK1; CDK11B; CDK18; CDK2; CDK4; CDK6; CDK9; CHEK1; CHUK; CSF1R; CSNK1D; CSNK2A1; DAPK3; DYRK1A; DYRK1B; EGFR; EIF2AK1; EIF2AK2; EPHA2; ERBB2; ERBB3; FLT4; FYN; GSK3A; GTF2F1; IGF1R; IKBKB; IRAK1; KIT; KSR1; LCK; LYN; MAP2K5; MAP2K6; MAP2K7; MAP3K2; MAP3K6; MAP3K7; MAP4K4; MAPK13; MAPK14; MAPK3…
Prostate	185	7923	69.2884	1.68173	9.59963e-21	8.14048e-18	1.809e-19	8.55231e-19	ABL1; ACVR1; ACVR1B; ACVR1C; AKT1; AKT2; AKT3; ALK; AR; BLK; BMP2K; BMPR1A; BMX; BRAF; BTK; CAMK1G; CAMK2A; CAMK2B; CAMK4; CAMKK1; CAMKK2; CAMKV; CDC25C; CDC7; CDK1; CDK10; CDK11A; CDK11B; CDK14; CDK15; CDK17; CDK19; CDK2; CDK20; CDK4; CDK6; CDK9; CHEK1; CHUK; CLK2; CLK3; CSF1R; CSNK1D; CSNK2A1; DDR1; DYRK1A; DYRK2; DYRK4; EGFR; EIF2AK1; EIF2AK2; ELK3; EPHA1; EPHA10; EPHA2; EPHA4; EPHB6; ERBB2; E…
Jurkat	107	2869	40.0749	2.68624	7.24198e-24	6.1412e-21	3.61247e-22	1.70785e-21	ABL1; ACVR1; ACVR1B; ACVR2B; ARAF; AURKB; BMP2K; BMPR1A; BRAF; BTK; CAMK2B; CAMK2D; CAMK4; CAMKK1; CAMKK2; CDK1; CDK2; CDK6; CDK9; CHEK1; CLK2; CLK3; CSF1R; CSNK1D; CSNK2A1; DDR1; DYRK1A; DYRK1B; EIF2AK1; EPHA1; EPHA4; EPHB1; EPHB6; FASTK; FER; FGFR1; FGR; FYN; GSK3A; GTF2F1; IGF1R; IRAK1; ITK; LCK; LIMK1; LIMK2; LYN; MAP2K5; MAP2K6; MAP2K7; MAP3K11; MAP3K12; MAP3K2; MAP3K3; MAP3K5; MAP3K9; MAP4K…
Bone marrow	178	7808	66.6667	1.64194	4.56237e-18	3.86889e-15	6.24015e-17	2.95013e-16	ABL1; ACVR1C; ACVR2B; AKT1; AKT2; AKT3; ALK; AURKB; AXL; BLK; BMP2K; BMPR1A; BMX; BRAF; BTK; CAMK1G; CAMK2A; CAMK2B; CAMK2D; CAMK4; CAMKK1; CAMKK2; CAMKV; CDC25C; CDK1; CDK10; CDK11A; CDK11B; CDK17; CDK19; CDK2; CDK20; CDK4; CDK6; CDK9; CHUK; CSF1R; CSNK1D; CSNK2A1; DDR1; DYRK1A; DYRK4; EGFR; EIF2AK1; EIF2AK2; ELK3; EPHA1; EPHA2; EPHA4; EPHB6; ERBB2; ERBB3; ERBB4; ERN1; FASTK; FER; FES; FGFR1; FG…
Lateral ventricle	163	6620	61.0487	1.7734	3.88507e-19	3.29454e-16	5.7799e-18	2.73254e-17	ABL1; ACVR1; ACVR1B; ACVR1C; ACVR2B; AKT1; AKT2; AKT3; ALK; AURKB; BMP2K; BMX; BRAF; BTK; CAMK1G; CAMK2A; CAMK2B; CAMK2D; CAMK4; CAMKK1; CAMKK2; CAMKV; CDC25C; CDC7; CDK1; CDK11A; CDK11B; CDK14; CDK15; CDK17; CDK19; CDK2; CDK20; CDK4; CDK9; CHUK; CSF1R; CSNK1D; CSNK2A1; DCLK2; DDR1; DMPK; DYRK1A; DYRK2; DYRK4; EGFR; EIF2AK1; EIF2AK2; ELK3; EPHA1; EPHA10; EPHA2; EPHB6; ERBB3; ERBB4; ERN1; FASTK; F…
Colorectal cancer	184	7513	68.9139	1.76392	2.95366e-23	2.50471e-20	1.089e-21	5.14843e-21	ABL1; ACVR1; ACVR1B; ACVR1C; ACVR2B; AKT1; AKT2; AKT3; ALK; AURKB; BLK; BMP2K; BMPR1A; BMX; BRAF; BTK; CAMK1G; CAMK2A; CAMK2B; CAMK4; CAMKK1; CAMKK2; CAMKV; CDC25C; CDC7; CDK1; CDK11A; CDK11B; CDK14; CDK15; CDK17; CDK19; CDK2; CDK20; CDK4; CDK6; CDK9; CHUK; CSF1R; CSNK1D; CSNK2A1; DCLK2; DDR1; DYRK1A; DYRK2; DYRK4; EGFR; EIF2AK1; EIF2AK2; ELK3; EPHA1; EPHA10; EPHA2; EPHA4; EPHB6; ERBB2; ERBB3; ER…
Gall bladder	179	7295	67.0412	1.76727	3.14297e-22	2.66524e-19	7.83894e-21	3.70598e-20	ABL1; ACVR1; ACVR1B; ACVR1C; ACVR2B; AKT1; AKT2; AKT3; ALK; AURKB; BMP2K; BMPR1A; BMX; BRAF; BTK; CAMK1G; CAMK2A; CAMK2B; CAMK2D; CAMK2G; CAMK4; CAMKK1; CAMKK2; CAMKV; CDC25C; CDC7; CDK11A; CDK11B; CDK14; CDK15; CDK17; CDK19; CDK2; CDK20; CDK4; CDK6; CDK9; CHUK; CSF1R; CSNK1D; CSNK2A1; DCLK2; DDR1; DYRK1A; DYRK2; DYRK4; EGFR; EIF2AK1; EPHA1; EPHA10; EPHA2; EPHA4; EPHB6; ERBB2; ERBB3; ERBB4; ERN1;…
Plasma	212	11971	79.4007	1.27549	9.50559e-10	8.06074e-07	8.76167e-09	4.14222e-08	ACVR1; ACVR1B; ACVR1C; ACVR2B; ADRBK1; AKT2; AKT3; AMHR2; AR; ARAF; AURKC; AXL; BLK; BMP2K; BMX; BRAF; BTK; CAMK1G; CAMK2A; CAMK2B; CAMK2D; CAMK2G; CAMK4; CAMKK2; CAMKV; CDK1; CDK11A; CDK11B; CDK14; CDK17; CDK18; CDK2; CDK20; CDK4; CDK9; CHEK1; CLK3; CSF1R; CSNK2A1; DAPK1; DAPK2; DAPK3; DDR1; DDR2; DMPK; DPF1; DSTYK; DUS3L; DYRK1A; DYRK1B; DYRK4; EGFR; EIF2AK1; EIF2AK2; EPHA1; EPHA10; EPHA4; EPHB…
Malignant carcinoid	178	7081	66.6667	1.81051	2.37488e-23	2.0139e-20	9.58998e-22	4.53381e-21	ABL1; ACVR1; ACVR1B; ACVR1C; ACVR2B; AKT1; AKT2; AKT3; ALK; AURKB; BLK; BMP2K; BMPR1A; BMX; BRAF; BTK; CAMK1G; CAMK2A; CAMK2B; CAMK2D; CAMK4; CAMKK1; CAMKK2; CAMKV; CDC25C; CDC7; CDK1; CDK11A; CDK11B; CDK14; CDK15; CDK17; CDK2; CDK20; CDK4; CDK6; CDK9; CHUK; CSF1R; CSNK1D; CSNK2A1; DCLK2; DDR1; DYRK1A; DYRK2; DYRK4; EGFR; EIF2AK1; EIF2AK2; ELK3; EPHA1; EPHA10; EPHA2; EPHA4; EPHB6; ERBB2; ERBB3; E…
Ascites cancer cell	21	3509	7.86517	0.431215	1	1	1	1	BMP2K; CAMK2D; CDK2; CSNK2A1; DDR1; EGFR; EIF2AK2; ERBB3; GTF2F1; IGF1R; MAPK3; MRPL28; NEK9; PTK2; PTK2B; SLK; TAOK3; TARDBP; TP53RK; TUT1; YES1;
Endometrial cancer	183	7460	68.5393	1.7668	4.05642e-23	3.43985e-20	1.37594e-21	6.50496e-21	ABL1; ACVR1; ACVR1B; ACVR1C; ACVR2B; AKT1; AKT2; AKT3; ALK; AR; AURKB; BLK; BMP2K; BMPR1A; BMX; BRAF; BTK; CAMK1G; CAMK2A; CAMK2B; CAMK4; CAMKK1; CAMKK2; CAMKV; CDC25C; CDC7; CDK1; CDK11A; CDK11B; CDK14; CDK15; CDK17; CDK19; CDK2; CDK20; CDK4; CDK6; CDK9; CHUK; CSF1R; CSNK1D; CSNK2A1; DCLK2; DDR1; DMPK; DYRK1A; DYRK2; DYRK4; EGFR; EIF2AK1; EIF2AK2; ELK3; EPHA1; EPHA2; EPHA4; EPHB6; ERBB2; ERBB3; …
Lung cancer	183	7435	68.5393	1.77274	2.59884e-23	2.20382e-20	1.00173e-21	4.73585e-21	ABL1; ACVR1; ACVR1B; ACVR1C; ACVR2B; AKT1; AKT2; AKT3; ALK; AURKB; BLK; BMP2K; BMPR1A; BMX; BRAF; BTK; CAMK1G; CAMK2A; CAMK2B; CAMK4; CAMKK1; CAMKK2; CAMKV; CDC25C; CDC7; CDK1; CDK11A; CDK11B; CDK14; CDK15; CDK17; CDK19; CDK2; CDK20; CDK4; CDK6; CDK9; CHUK; CSF1R; CSNK1D; CSNK2A1; DCLK2; DDR1; DYRK1A; DYRK2; DYRK4; EGFR; EIF2AK1; EIF2AK2; ELK3; EPHA1; EPHA10; EPHA2; EPHA4; EPHB6; ERBB2; ERBB3; ER…
HCT116	41	2651	15.3558	1.11412	0.250852	1	1	1	BLK; CAMK2B; CDK1; CDK2; CDK20; CSNK2A1; EGFR; EIF2AK2; EPHA2; EPHA4; EPHB1; ERBB2; ERBB4; FGFR1; FGFR3; FGR; FLT3; FLT4; FYN; GTF2F1; HCK; ICK; KIT; LCK; LYN; MAPK3; MAPK4; MRPL28; NLK; NOC4L; PDGFRA; PDGFRB; PRKACA; PRKACG; SGK2; SRC; STK3; TARDBP; TBK1; TUT1; YES1;
PC3	12	1294	4.49438	0.668432	0.951252	1	1	1	ALK; AXL; CAMK2G; DDR1; EPHA1; EPHA2; LIMK2; PRKACA; PRKCQ; TARDBP; TUT1; YES1;
MicroProt	2	440	0.749064	0.328992	0.985451	1	1	1	CAMK2B; CAMK2G;
Epididymis	181	7090	67.7903	1.83869	6.04106e-25	5.12282e-22	5.07296e-23	2.39832e-22	ABL1; ACVR1; ACVR1B; ACVR1C; ACVR2B; AKT1; AKT2; AKT3; ALK; AR; BLK; BMP2K; BMPR1A; BMX; BRAF; BTK; CAMK1G; CAMK2A; CAMK2B; CAMK4; CAMKK1; CAMKK2; CAMKV; CDC25C; CDC7; CDK1; CDK11A; CDK11B; CDK14; CDK15; CDK17; CDK19; CDK2; CDK20; CDK4; CDK6; CDK9; CHUK; CSF1R; CSNK1D; CSNK2A1; DDR1; DYRK1A; DYRK2; DYRK4; EGFR; EIF2AK1; EIF2AK2; ELK3; EPHA1; EPHA10; EPHA2; EPHA4; EPHB6; ERBB2; ERBB3; ERBB4; ERN1;…
Cerebellum	180	7633	67.4157	1.69845	2.95223e-20	2.50349e-17	5.10916e-19	2.41543e-18	ABL1; ACVR1; ACVR1B; ACVR1C; AKT1; AKT2; AKT3; ALK; AURKB; BLK; BMP2K; BMX; BRAF; BTK; CAMK1G; CAMK2A; CAMK2B; CAMK2D; CAMK4; CAMKK1; CAMKK2; CAMKV; CDC25C; CDK11A; CDK11B; CDK14; CDK15; CDK17; CDK19; CDK20; CDK4; CDK6; CDK9; CHUK; CSF1R; CSNK1D; CSNK2A1; DCLK2; DDR1; DMPK; DYRK1A; DYRK2; DYRK4; EGFR; EIF2AK1; EIF2AK2; ELK3; EPHA1; EPHA10; EPHA2; EPHA4; EPHB6; ERBB2; ERBB3; ERBB4; ERN1; FASTK; FE…
Nasopharynx	173	6904	64.794	1.80477	4.67048e-22	3.96057e-19	1.13159e-20	5.34977e-20	ABL1; ACVR1; ACVR1B; ACVR1C; ACVR2B; AKT1; AKT2; AKT3; ALK; BMP2K; BMPR1A; BMX; BRAF; BTK; CAMK1G; CAMK2A; CAMK2B; CAMK4; CAMKK1; CAMKK2; CAMKV; CDC25C; CDC7; CDK1; CDK11A; CDK11B; CDK14; CDK15; CDK17; CDK19; CDK20; CDK4; CDK6; CDK9; CHUK; CSF1R; CSNK1D; CSNK2A1; DCLK2; DDR1; DMPK; DYRK1A; DYRK2; DYRK4; EGFR; EIF2AK1; EIF2AK2; ELK3; EPHA1; EPHA10; EPHA2; EPHA4; ERBB2; ERBB3; ERBB4; ERN1; FASTK; F…
global_SCX_fractionated	23	2476	8.61423	0.669293	0.988907	1	1	1	CAMK2D; CAMK2G; CDK1; CSNK2A1; EGFR; EIF2AK2; GTF2F1; IKBKB; MAP4K4; MAPK14; MRPL28; NOC4L; PDPK1; PRKACA; PTK2; RPS6KA1; RPS6KA4; SLK; SRC; TARDBP; TP53RK; TUT1; YES1;
Hippocampus	175	7355	65.5431	1.71369	9.89655e-20	8.39228e-17	1.64554e-18	7.77957e-18	ABL1; ACVR1; ACVR1B; ACVR1C; ACVR2B; AKT1; AKT2; AKT3; ALK; AURKB; BMP2K; BMX; BRAF; BTK; CAMK1G; CAMK2A; CAMK2B; CAMK2D; CAMK4; CAMKK1; CAMKK2; CAMKV; CDC25C; CDK1; CDK11A; CDK11B; CDK14; CDK15; CDK17; CDK19; CDK2; CDK20; CDK4; CDK6; CDK9; CHUK; CSF1R; CSNK1D; CSNK2A1; DCLK2; DDR1; DYRK1A; DYRK2; DYRK4; EGFR; EIF2AK1; EIF2AK2; EPHA1; EPHA2; EPHA4; EPHB6; ERBB2; ERBB3; ERBB4; ERN1; FASTK; FER; FE…
HeLa	143	5789	53.5581	1.77916	8.15844e-16	6.91836e-13	9.74416e-15	4.6067e-14	ABL1; ACVR1; ACVR1B; ACVR2B; AKT1; ALK; ARAF; AURKB; BMP2K; BMPR1A; BRAF; BTK; CAMK2A; CAMK2B; CAMK2D; CAMK2G; CAMK4; CAMKK1; CAMKK2; CDC7; CDK1; CDK10; CDK14; CDK15; CDK18; CDK2; CDK20; CDK4; CDK6; CDK9; CHEK1; CLK2; CSNK1D; CSNK2A1; DAPK1; DDR1; DYRK1B; DYRK4; EGFR; EIF2AK1; EPHA1; EPHA2; EPHB1; ERBB3; ERBB4; FER; FES; FGFR1; FGFR3; FGR; FLT4; FRK; FYN; GRK7; GSG2; GSK3A; GTF2F1; HCK; HIPK4; IC…
Malignant lymphoma	177	6586	66.2921	1.93565	6.62803e-27	5.62057e-24	9.36762e-25	4.42869e-24	ABL1; ACVR1; ACVR1B; ACVR1C; ACVR2B; AKT1; AKT2; AKT3; ALK; AURKB; BLK; BMP2K; BMPR1A; BMX; BRAF; BTK; CAMK1G; CAMK2A; CAMK4; CAMKK1; CAMKK2; CAMKV; CDC25C; CDC7; CDK1; CDK11A; CDK11B; CDK15; CDK17; CDK19; CDK2; CDK20; CDK4; CDK6; CDK9; CHUK; CSF1R; CSNK1D; CSNK2A1; DCLK2; DDR1; DMPK; DYRK1A; DYRK2; DYRK4; EGFR; EIF2AK1; EIF2AK2; ELK3; EPHA1; EPHA10; EPHA2; EPHA4; EPHB6; ERBB2; ERBB3; ERBB4; ERN1…
Prostate cancer	178	7214	66.6667	1.77713	2.57314e-22	2.18202e-19	6.81881e-21	3.2237e-20	ABL1; ACVR1; ACVR1B; ACVR1C; ACVR2B; AKT1; AKT2; AKT3; ALK; AR; AURKB; BLK; BMP2K; BMX; BRAF; BTK; CAMK1G; CAMK2A; CAMK2B; CAMK4; CAMKK1; CAMKK2; CAMKV; CDC25C; CDC7; CDK1; CDK11A; CDK11B; CDK14; CDK15; CDK17; CDK19; CDK2; CDK20; CDK4; CDK6; CDK9; CHUK; CSF1R; CSNK1D; CSNK2A1; DCLK2; DDR1; DYRK1A; DYRK2; DYRK4; EGFR; EIF2AK1; EIF2AK2; ELK3; EPHA1; EPHA2; EPHA4; EPHB6; ERBB2; ERBB3; ERBB4; ERN1; F…
Skin	162	7292	60.6742	1.6001	3.03239e-14	2.57146e-11	3.25502e-13	1.53886e-12	ABL1; ACVR1B; ACVR1C; AKT1; AKT2; AKT3; ALK; AR; ARAF; AURKB; BMP2K; BMPR1A; BMX; BRAF; BTK; CAMK1G; CAMK2A; CAMK2B; CAMKK1; CAMKK2; CAMKV; CDC25C; CDK1; CDK11A; CDK14; CDK15; CDK17; CDK19; CDK2; CDK20; CDK4; CDK6; CDK9; CHUK; CSF1R; CSNK1D; CSNK2A1; DCLK2; DDR1; DDR2; DMPK; DYRK1A; DYRK2; DYRK4; EGFR; EIF2AK1; EPHA1; EPHA10; EPHA2; ERBB2; ERBB3; ERBB4; ERN1; FASTK; FER; FES; FGFR1; FGFR3; FGR; F…
Placenta	208	10894	77.9026	1.37514	2.02125e-13	1.71402e-10	2.0405e-12	9.64678e-12	ABL1; ACVR1; ACVR1B; ACVR1C; ACVR2B; AKT1; AKT2; AKT3; ALK; AURKB; BLK; BMP2K; BMPR1A; BMX; BRAF; BTK; CAMK1G; CAMK2A; CAMK2B; CAMK2D; CAMK2G; CAMK4; CAMKK1; CAMKK2; CAMKV; CDC25C; CDC7; CDK1; CDK10; CDK11A; CDK11B; CDK14; CDK15; CDK17; CDK19; CDK2; CDK20; CDK4; CDK6; CDK9; CHUK; CSF1R; CSNK1D; CSNK2A1; DAPK1; DAPK2; DAPK3; DCLK2; DDR1; DDR2; DSTYK; DYRK1A; DYRK2; DYRK4; EGFR; EIF2AK1; EIF2AK2; E…
Lung	200	9992	74.9064	1.44162	7.87976e-15	6.68204e-12	8.79215e-14	4.15663e-13	ABL1; ACVR1; ACVR1B; ACVR1C; AKT1; AKT2; AKT3; ALK; AR; AURKB; BLK; BMP2K; BMPR1A; BMX; BRAF; BTK; CAMK1G; CAMK2A; CAMK2B; CAMK4; CAMKK1; CAMKK2; CAMKV; CDC25C; CDC7; CDK1; CDK10; CDK11A; CDK11B; CDK14; CDK15; CDK17; CDK19; CDK20; CDK4; CDK6; CDK9; CHUK; CSF1R; CSNK1D; CSNK2A1; DAPK2; DCLK2; DDR1; DMPK; DYRK1A; DYRK1B; DYRK2; DYRK4; EGFR; EIF2AK1; EIF2AK2; ELK3; EPHA1; EPHA10; EPHA2; EPHA4; ERBB2…
Cerebral cortex	181	7099	67.7903	1.83636	7.15565e-25	6.06799e-22	5.07296e-23	2.39832e-22	ABL1; ACVR1; ACVR1B; ACVR1C; AKT1; AKT2; AKT3; ALK; AURKB; BMP2K; BMX; BRAF; BTK; CAMK1G; CAMK2A; CAMK2B; CAMK2D; CAMK4; CAMKK1; CAMKK2; CAMKV; CDC25C; CDK1; CDK11A; CDK11B; CDK14; CDK15; CDK17; CDK19; CDK20; CDK4; CDK6; CDK9; CHUK; CSF1R; CSNK1D; CSNK2A1; DCLK2; DDR1; DMPK; DYRK1A; DYRK2; DYRK4; EGFR; EIF2AK1; EIF2AK2; EPHA1; EPHA10; EPHA2; EPHA4; EPHB6; ERBB2; ERBB3; ERBB4; ERN1; FASTK; FER; FE…
Ovarian cancer	190	7644	71.161	1.79022	1.30458e-25	1.10629e-22	1.22921e-23	5.81127e-23	ABL1; ACVR1; ACVR1B; ACVR1C; ACVR2B; AKT1; AKT2; AKT3; ALK; AR; AURKB; BLK; BMP2K; BMPR1A; BMX; BRAF; BTK; CAMK1G; CAMK2A; CAMK2B; CAMK4; CAMKK1; CAMKK2; CAMKV; CDC25C; CDC7; CDK1; CDK11A; CDK11B; CDK14; CDK15; CDK17; CDK19; CDK2; CDK20; CDK4; CDK6; CDK9; CHUK; CSF1R; CSNK1D; CSNK2A1; DCLK2; DDR1; DMPK; DYRK1A; DYRK2; DYRK4; EGFR; EIF2AK1; EIF2AK2; ELK3; EPHA1; EPHA10; EPHA2; EPHA4; EPHB6; ERBB2;…
Kidney	212	10256	79.4007	1.48878	4.00121e-19	3.39302e-16	5.85004e-18	2.7657e-17	ABL1; ACVR1; ACVR1B; ACVR1C; ACVR2B; AKT1; AKT2; AKT3; ALK; AR; AURKB; BLK; BMP2K; BMPR1A; BMX; BRAF; BTK; CAMK1G; CAMK2A; CAMK2B; CAMK4; CAMKK1; CAMKK2; CAMKV; CDC25C; CDC7; CDK1; CDK10; CDK11A; CDK11B; CDK14; CDK15; CDK17; CDK19; CDK2; CDK20; CDK4; CDK6; CDK9; CHUK; CSF1R; CSNK1D; CSNK2A1; DAPK2; DCLK2; DDR1; DDR2; DSTYK; DYRK1A; DYRK2; DYRK4; EGFR; EIF2AK1; EIF2AK2; ELK3; EPHA1; EPHA10; EPHA2;…
H1688	6	1007	2.24719	0.429826	0.995457	1	1	1	CAMK2D; CSNK2A1; DDR1; KIT; TARDBP; TUT1;
Sy5y	22	2490	8.2397	0.636606	0.994284	1	1	1	ALK; CDK9; CHEK1; CSNK1D; EIF2AK2; GTF2F1; IGF1R; LYN; MAPK14; MAPK3; MRPL28; PDGFRA; PDGFRB; PDPK1; PKN2; PRKACA; PRKCA; RET; ROR2; SRC; TARDBP; TUT1;
Duodenum	177	7275	66.2921	1.75233	2.4942e-21	2.11508e-18	5.0359e-20	2.3808e-19	ABL1; ACVR1; ACVR1B; ACVR1C; ACVR2B; AKT1; AKT2; AKT3; ALK; AURKB; BMP2K; BMPR1A; BMX; BRAF; BTK; CAMK1G; CAMK2A; CAMK4; CAMKK1; CAMKK2; CAMKV; CDC25C; CDC7; CDK1; CDK11A; CDK11B; CDK14; CDK15; CDK17; CDK19; CDK2; CDK20; CDK4; CDK6; CDK9; CHUK; CSF1R; CSNK1D; CSNK2A1; DCLK2; DDR1; DMPK; DYRK1A; DYRK2; DYRK4; EGFR; EIF2AK1; EIF2AK2; ELK3; EPHA1; EPHA10; EPHA2; EPHA4; EPHB6; ERBB2; ERBB3; ERBB4; ER…
Bronchus	173	6923	64.794	1.79982	6.54685e-22	5.55173e-19	1.54215e-20	7.29074e-20	ABL1; ACVR1; ACVR1B; ACVR1C; ACVR2B; AKT1; AKT2; AKT3; ALK; AURKB; BMP2K; BMPR1A; BMX; BRAF; BTK; CAMK1G; CAMK2A; CAMK2B; CAMK4; CAMKK1; CAMKK2; CAMKV; CDC25C; CDC7; CDK1; CDK11A; CDK11B; CDK14; CDK15; CDK17; CDK19; CDK20; CDK4; CDK6; CDK9; CHUK; CSF1R; CSNK1D; CSNK2A1; DCLK2; DDR1; DMPK; DYRK1A; DYRK2; DYRK4; EGFR; EIF2AK1; EIF2AK2; EPHA1; EPHA10; EPHA2; EPHA4; EPHB6; ERBB2; ERBB3; ERBB4; ERN1; …
Brain	153	7290	57.3034	1.51162	8.05127e-11	6.82747e-08	7.58608e-10	3.58644e-09	ACVR1C; ACVR2B; ADRBK1; AKT1; AKT2; AKT3; ALK; AURKB; BLK; BMP2K; BMPR1A; CAMK1G; CAMK2A; CAMK2B; CAMK2D; CAMK2G; CAMK4; CAMKK1; CAMKK2; CAMKV; CDC7; CDK1; CDK10; CDK11B; CDK14; CDK15; CDK17; CDK18; CDK2; CDK4; CDK6; CDK9; CSNK2A1; DAPK2; DCLK2; DDR2; DMPK; DPF1; DSTYK; DYRK1A; DYRK1B; EGFR; EIF2AK1; EIF2AK2; EPHA2; EPHA4; EPHB6; ERBB3; ERBB4; ERN1; FASTK; FGFR1; FGFR3; FGR; FLT3; FLT4; FYN; GRK6…
Stomach	185	8044	69.2884	1.65644	6.83435e-20	5.79553e-17	1.15911e-18	5.47985e-18	ABL1; ACVR1; ACVR1B; ACVR1C; ACVR2B; AKT1; AKT2; AKT3; ALK; AURKB; BLK; BMP2K; BMPR1A; BMX; BRAF; BTK; CAMK1G; CAMK2A; CAMK2B; CAMK4; CAMKK1; CAMKK2; CAMKV; CDC25C; CDC7; CDK1; CDK11A; CDK11B; CDK14; CDK15; CDK17; CDK19; CDK2; CDK20; CDK4; CDK6; CDK9; CHUK; CSF1R; CSNK1D; CSNK2A1; DCLK2; DDR1; DYRK1A; DYRK2; DYRK4; EGFR; EIF2AK1; EIF2AK2; EPHA1; EPHA10; EPHA2; EPHA4; EPHB6; ERBB2; ERBB3; ERBB4; E…
Pancreas	197	9936	73.7828	1.428	7.96458e-14	6.75396e-11	8.1373e-13	3.84704e-12	ABL1; ACVR1; ACVR1B; ACVR1C; ACVR2B; AKT1; AKT2; AKT3; ALK; BLK; BMP2K; BMPR1A; BMX; BRAF; BTK; CAMK1G; CAMK2A; CAMK2B; CAMK2D; CAMK4; CAMKK1; CAMKK2; CAMKV; CDC25C; CDC7; CDK1; CDK10; CDK11A; CDK11B; CDK14; CDK15; CDK17; CDK19; CDK20; CDK4; CDK6; CDK9; CHUK; CSF1R; CSNK1D; CSNK2A1; DAPK2; DDR1; DSTYK; DYRK1A; DYRK2; DYRK4; EGFR; EIF2AK1; EIF2AK2; ELK3; EPHA1; EPHA10; EPHA2; EPHA4; EPHB6; ERBB2; …
Lymph nodes	165	6700	61.7978	1.77373	1.57887e-19	1.33888e-16	2.39087e-18	1.13032e-17	ABL1; ACVR1; ACVR1B; ACVR1C; AKT1; AKT2; AKT3; ALK; AR; AURKB; BLK; BMP2K; BMPR1A; BMX; BRAF; BTK; CAMK1G; CAMK2A; CAMK4; CAMKK1; CAMKK2; CAMKV; CDC25C; CDC7; CDK1; CDK11A; CDK11B; CDK14; CDK17; CDK19; CDK2; CDK20; CDK4; CDK6; CDK9; CHUK; CSF1R; CSNK1D; CSNK2A1; DDR1; DYRK1A; DYRK4; EGFR; EIF2AK1; EIF2AK2; ELK3; EPHA1; EPHA2; EPHA4; EPHB6; ERBB2; ERBB3; ERBB4; ERN1; FASTK; FER; FES; FGFR1; FGFR3;…
H358	12	1489	4.49438	0.580895	0.988007	1	1	1	AKT1; CDK1; CDK6; DDR1; EGFR; EIF2AK2; EPHA2; GTF2F1; LYN; MAPK14; TARDBP; ULK2;
Fallopian tubes	168	6677	62.9213	1.8122	3.30986e-21	2.80676e-18	6.52736e-20	3.08591e-19	ABL1; ACVR1; ACVR1B; ACVR1C; ACVR2B; AKT1; AKT2; AKT3; ALK; AR; BMP2K; BMX; BRAF; BTK; CAMK1G; CAMK2A; CAMK2B; CAMK4; CAMKK1; CAMKV; CDC25C; CDC7; CDK1; CDK11A; CDK11B; CDK15; CDK17; CDK19; CDK2; CDK20; CDK4; CDK6; CDK9; CHUK; CSF1R; CSNK1D; CSNK2A1; DCLK2; DDR1; DYRK1A; DYRK2; DYRK4; EGFR; EIF2AK1; EIF2AK2; ELK3; EPHA1; EPHA10; EPHA2; EPHA4; EPHB6; ERBB2; ERBB3; ERBB4; ERN1; FASTK; FER; FES; FGF…
Head & neck cancer	173	7062	64.794	1.76439	7.39117e-21	6.26772e-18	1.42448e-19	6.73445e-19	ABL1; ACVR1; ACVR1B; ACVR1C; ACVR2B; AKT1; AKT2; AKT3; ALK; AURKB; BMP2K; BMPR1A; BMX; BRAF; BTK; CAMK1G; CAMK2A; CAMK4; CAMKK1; CAMKK2; CAMKV; CDC25C; CDC7; CDK1; CDK11A; CDK11B; CDK14; CDK15; CDK17; CDK19; CDK2; CDK20; CDK4; CDK6; CDK9; CHUK; CSF1R; CSNK1D; CSNK2A1; DCLK2; DDR1; DDR2; DYRK1A; DYRK2; DYRK4; EGFR; EIF2AK1; EIF2AK2; ELK3; EPHA1; EPHA10; EPHA2; EPHA4; EPHB6; ERBB2; ERBB3; ERBB4; ER…
Pancreatic cancer	188	8316	70.412	1.62824	1.5627e-19	1.32517e-16	2.39087e-18	1.13032e-17	ABL1; ACVR1; ACVR1B; ACVR1C; ACVR2B; AKT1; AKT2; AKT3; ALK; AURKB; BLK; BMP2K; BMPR1A; BMX; BRAF; BTK; CAMK1G; CAMK2A; CAMK2B; CAMK2D; CAMK2G; CAMK4; CAMKK1; CAMKK2; CAMKV; CDC25C; CDC7; CDK1; CDK11A; CDK11B; CDK14; CDK15; CDK17; CDK19; CDK2; CDK20; CDK4; CDK6; CDK9; CHUK; CSF1R; CSNK1D; CSNK2A1; DCLK2; DDR1; DMPK; DYRK1A; DYRK2; DYRK4; EGFR; EIF2AK1; EIF2AK2; ELK3; EPHA1; EPHA10; EPHA2; EPHA4; E…
BT474	2	558	0.749064	0.259422	0.996688	1	1	1	ERBB2; TUT1;
Seminal vesicle	164	6620	61.4232	1.78428	1.2624e-19	1.07051e-16	2.01983e-18	9.54907e-18	ABL1; ACVR1; ACVR1B; ACVR1C; ACVR2B; AKT1; AKT2; AKT3; ALK; AR; AURKB; BLK; BMP2K; BMPR1A; BMX; BRAF; BTK; CAMK1G; CAMK2B; CAMK2D; CAMK4; CAMKK1; CAMKV; CDC25C; CDC7; CDK11A; CDK11B; CDK14; CDK15; CDK17; CDK19; CDK20; CDK4; CDK6; CDK9; CHEK1; CHUK; CSF1R; CSNK1D; CSNK2A1; DCLK2; DDR1; DYRK1A; DYRK2; DYRK4; EGFR; EIF2AK1; EIF2AK2; ELK3; EPHA1; EPHA10; EPHA4; ERBB2; ERBB3; ERBB4; ERN1; FASTK; FER; …
Urinary bladder	178	7054	66.6667	1.81744	1.45088e-23	1.23035e-20	6.4755e-22	3.06139e-21	ABL1; ACVR1; ACVR1B; ACVR1C; ACVR2B; AKT1; AKT2; AKT3; ALK; AURKB; BMP2K; BMPR1A; BMX; BRAF; BTK; CAMK1G; CAMK2A; CAMK2D; CAMK4; CAMKK1; CAMKK2; CAMKV; CDC25C; CDC7; CDK1; CDK11A; CDK11B; CDK14; CDK15; CDK17; CDK19; CDK2; CDK20; CDK4; CDK6; CDK9; CHUK; CSF1R; CSNK1D; CSNK2A1; DCLK2; DDR1; DYRK1A; DYRK2; DYRK4; EGFR; EIF2AK1; EIF2AK2; ELK3; EPHA1; EPHA2; EPHA4; EPHB6; ERBB2; ERBB3; ERBB4; ERN1; FA…
K-562	104	2513	38.9513	2.9808	1.06063e-26	8.99413e-24	1.28488e-24	6.07445e-24	ABL1; ACVR1; ACVR1B; ACVR2B; AKT1; ARAF; AURKB; BMP2K; BMPR1A; BMX; BRAF; BTK; CAMK2A; CAMK2B; CAMK2D; CAMKK1; CAMKK2; CDK1; CDK11A; CDK2; CDK6; CDK9; CLK2; CSNK1D; CSNK2A1; DDR1; DDR2; DYRK1A; DYRK1B; EIF2AK1; EPHA4; EPHB1; EPHB6; FER; FGFR1; FGFR3; FLT4; FRK; FYN; GSK3A; GTF2F1; HCK; IGF1R; IRAK1; ITK; KIT; LCK; LIMK1; LIMK2; LRRK2; LYN; MAP2K5; MAP3K11; MAP3K2; MAP3K3; MAP3K5; MAP3K6; MAP3K9; …
Salivary glands	157	6607	58.8015	1.71149	1.94407e-16	1.64857e-13	2.42437e-15	1.14616e-14	ABL1; ACVR1B; ACVR1C; AKT1; AKT2; AKT3; ALK; BMP2K; BMPR1A; BMX; BRAF; BTK; CAMK1G; CAMK2A; CAMK4; CAMKK1; CAMKK2; CAMKV; CDC25C; CDK11A; CDK11B; CDK15; CDK17; CDK19; CDK20; CDK4; CDK6; CDK9; CHUK; CSF1R; CSNK1D; CSNK2A1; DDR1; DDR2; DYRK1A; DYRK2; DYRK4; EGFR; EIF2AK1; EIF2AK2; ELK3; EPHA1; EPHA2; ERBB2; ERBB3; ERBB4; ERN1; FASTK; FER; FES; FGFR1; FGR; FLT3; FRK; FYN; GRK4; GRK6; GSG2; GSK3A; GT…
Testis	215	10269	80.5243	1.50793	1.09073e-20	9.24939e-18	2.01074e-19	9.50606e-19	ABL1; ACVR1; ACVR1B; ACVR1C; ACVR2B; AKT1; AKT2; AKT3; ALK; AMHR2; AR; AURKB; AURKC; BLK; BMP2K; BMPR1A; BMX; BRAF; BTK; CAMK1G; CAMK2A; CAMK2B; CAMK2D; CAMK4; CAMKK1; CAMKK2; CAMKV; CDC25C; CDC7; CDK1; CDK10; CDK11A; CDK11B; CDK14; CDK15; CDK17; CDK19; CDK2; CDK20; CDK4; CDK6; CDK9; CHEK1; CHUK; CLK2; CLK3; CSF1R; CSNK1D; CSNK2A1; DAPK3; DCLK2; DDR1; DSTYK; DYRK1A; DYRK1B; DYRK2; DYRK4; EGFR; EI…
MDA231	2	336	0.749064	0.43082	0.949156	1	1	1	AXL; TUT1;
Urothelial cancer	187	7521	70.0375	1.79077	7.17872e-25	6.08755e-22	5.07296e-23	2.39832e-22	ABL1; ACVR1; ACVR1B; ACVR1C; ACVR2B; AKT1; AKT2; AKT3; ALK; AR; AURKB; BLK; BMP2K; BMX; BRAF; BTK; CAMK1G; CAMK2A; CAMK2B; CAMK4; CAMKK1; CAMKK2; CAMKV; CDC25C; CDC7; CDK1; CDK11A; CDK11B; CDK14; CDK15; CDK17; CDK19; CDK2; CDK20; CDK4; CDK6; CDK9; CHUK; CSF1R; CSNK1D; CSNK2A1; DCLK2; DDR1; DMPK; DYRK1A; DYRK2; DYRK4; EGFR; EIF2AK1; EIF2AK2; ELK3; EPHA1; EPHA10; EPHA2; EPHA4; EPHB6; ERBB2; ERBB3; …
R	20	1948	7.49064	0.739789	0.943503	1	1	1	BTK; CDK1; CDK11B; CDK2; CDK6; CSNK2A1; EIF2AK2; GSK3A; GTF2F1; MAP4K4; MAPK14; NRBP1; PKN1; PRKACA; RPS6KA3; SLK; TAOK3; TNNI3K; TP53RK; TUT1;
Soft tissue	169	6969	63.2959	1.7466	1.55224e-19	1.3163e-16	2.39087e-18	1.13032e-17	ABL1; ACVR1; ACVR1B; ACVR1C; ACVR2B; AKT1; AKT2; AKT3; ALK; AURKB; BLK; BMP2K; BMPR1A; BMX; BRAF; BTK; CAMK1G; CAMK2A; CAMK4; CAMKK1; CAMKK2; CAMKV; CDC25C; CDK1; CDK11A; CDK11B; CDK14; CDK15; CDK17; CDK19; CDK20; CDK4; CDK6; CDK9; CHUK; CSF1R; CSNK1D; CSNK2A1; DCLK2; DDR1; DMPK; DYRK1A; DYRK2; DYRK4; EGFR; EIF2AK1; EIF2AK2; ELK3; EPHA1; EPHA10; EPHA2; EPHA4; ERBB3; ERBB4; ERN1; FASTK; FER; FES; …
Testis cancer	182	7248	68.1648	1.80854	3.13267e-24	2.6565e-21	1.66031e-22	7.84939e-22	ABL1; ACVR1; ACVR1B; ACVR1C; ACVR2B; AKT1; AKT2; AKT3; ALK; AR; AURKB; BLK; BMP2K; BMPR1A; BMX; BRAF; BTK; CAMK1G; CAMK2A; CAMK2B; CAMK4; CAMKK1; CAMKK2; CAMKV; CDC25C; CDC7; CDK1; CDK11A; CDK11B; CDK14; CDK15; CDK17; CDK19; CDK2; CDK20; CDK4; CDK6; CDK9; CHUK; CSF1R; CSNK1D; CSNK2A1; DCLK2; DDR1; DYRK1A; DYRK2; DYRK4; EGFR; EIF2AK1; EIF2AK2; ELK3; EPHA1; EPHA2; EPHA4; EPHB6; ERBB2; ERBB3; ERBB4;…
Neutrophil	13	2031	4.86891	0.461336	0.999734	1	1	1	AXL; CAMK2D; CDK9; CSF1R; EGFR; EIF2AK2; FLT4; KIT; LYN; MOS; SLK; TARDBP; TUT1;
CD8	48	3327	17.9775	1.03927	0.409352	1	1	1	ABL1; ADRBK1; AKT2; BTK; CAMK2A; CAMK2B; CAMK2D; CAMK2G; CDK1; CDK11B; CDK2; CDK6; CDK9; CSNK2A1; EGFR; EIF2AK2; FYN; GSK3A; GTF2F1; HCK; IKBKB; LCK; LYN; MAPK3; MAPT; MOS; NEK9; NOC4L; PKN1; PKN2; PRKACA; PRKCA; PRKCB; PRKCG; PRKCH; PRKCQ; PRKD2; PTK2B; RIPK1; RPS6KA3; SLK; SRC; STK38; TARDBP; TP53RK; TUT1; YES1; ZAP70;
Stomach cancer	185	7399	69.2884	1.80083	1.03902e-24	8.81086e-22	6.77759e-23	3.20421e-22	ABL1; ACVR1; ACVR1B; ACVR1C; ACVR2B; AKT1; AKT2; AKT3; ALK; AURKB; BLK; BMP2K; BMPR1A; BMX; BRAF; BTK; CAMK1G; CAMK2A; CAMK2B; CAMK4; CAMKK1; CAMKK2; CAMKV; CDC25C; CDC7; CDK1; CDK11A; CDK11B; CDK14; CDK15; CDK17; CDK19; CDK2; CDK20; CDK4; CDK6; CDK9; CHUK; CSF1R; CSNK1D; CSNK2A1; DCLK2; DDR1; DMPK; DYRK1A; DYRK2; DYRK4; EGFR; EIF2AK1; EIF2AK2; ELK3; EPHA1; EPHA10; EPHA2; EPHA4; EPHB6; ERBB2; ERB…
Skin cancer	177	7029	66.2921	1.81366	3.22646e-23	2.73604e-20	1.14002e-21	5.38961e-21	ABL1; ACVR1; ACVR1B; ACVR1C; ACVR2B; AKT1; AKT2; AKT3; ALK; AR; AURKB; BLK; BMP2K; BMPR1A; BMX; BRAF; BTK; CAMK1G; CAMK2A; CAMK4; CAMKK1; CAMKK2; CAMKV; CDC25C; CDC7; CDK1; CDK11A; CDK11B; CDK15; CDK17; CDK19; CDK2; CDK20; CDK4; CDK6; CDK9; CHUK; CSF1R; CSNK1D; CSNK2A1; DCLK2; DDR1; DDR2; DYRK1A; DYRK2; DYRK4; EGFR; EIF2AK1; EIF2AK2; ELK3; EPHA1; EPHA10; EPHA2; EPHA4; EPHB6; ERBB2; ERBB3; ERBB4; …
Adrenal glands	181	7554	67.7903	1.72575	2.41835e-21	2.05076e-18	5.00185e-20	2.3647e-19	ABL1; ACVR1; ACVR1B; ACVR1C; ACVR2B; AKT1; AKT2; AKT3; ALK; AR; AURKB; BLK; BMP2K; BMPR1A; BMX; BRAF; BTK; CAMK1G; CAMK2A; CAMK2B; CAMK4; CAMKK1; CAMKK2; CAMKV; CDC25C; CDK11A; CDK11B; CDK14; CDK15; CDK17; CDK19; CDK2; CDK20; CDK4; CDK6; CDK9; CHUK; CSF1R; CSNK1D; CSNK2A1; DCLK2; DDR1; DMPK; DYRK1A; DYRK2; DYRK4; EGFR; EIF2AK1; EIF2AK2; EPHA1; EPHA10; EPHA2; EPHA4; ERBB2; ERBB3; ERBB4; ERN1; FAST…
TOV112D	7	1276	2.62172	0.395654	0.999098	1	1	1	AXL; CDK1; MERTK; NEK9; SLK; TARDBP; TUT1;
LNCaP	14	1455	5.24345	0.693464	0.947254	1	1	1	DAPK1; DAPK3; DDR1; EGFR; EPHA1; ERBB2; LIMK2; MAP2K5; MAPT; PRKACA; PTK2; SGK2; TARDBP; TUT1;
Corpus, uterine	173	6997	64.794	1.78078	2.40367e-21	2.03831e-18	5.00185e-20	2.3647e-19	ABL1; ACVR1; ACVR1B; ACVR1C; ACVR2B; AKT1; AKT2; AKT3; ALK; AR; AURKB; BLK; BMP2K; BMPR1A; BMX; BRAF; BTK; CAMK1G; CAMK2A; CAMK2B; CAMK4; CAMKK1; CAMKK2; CAMKV; CDC25C; CDC7; CDK1; CDK11A; CDK11B; CDK14; CDK15; CDK17; CDK19; CDK20; CDK4; CDK6; CDK9; CHUK; CSF1R; CSNK1D; CSNK2A1; DCLK2; DDR1; DYRK1A; DYRK2; DYRK4; EGFR; EIF2AK1; EIF2AK2; ELK3; EPHA1; EPHA10; EPHA2; EPHA4; EPHB6; ERBB2; ERBB3; ERBB…
Appendix	176	7004	65.9176	1.80985	7.11687e-23	6.03511e-20	2.08107e-21	9.83859e-21	ABL1; ACVR1; ACVR1B; ACVR1C; ACVR2B; AKT1; AKT3; ALK; AURKB; BMP2K; BMPR1A; BMX; BRAF; BTK; CAMK1G; CAMK2A; CAMK2B; CAMK2D; CAMK4; CAMKK1; CAMKK2; CAMKV; CDC25C; CDC7; CDK1; CDK11A; CDK11B; CDK14; CDK15; CDK17; CDK19; CDK2; CDK20; CDK4; CDK6; CDK9; CHUK; CSF1R; CSNK1D; CSNK2A1; DCLK2; DDR1; DMPK; DYRK1A; DYRK2; DYRK4; EGFR; EIF2AK1; EIF2AK2; ELK3; EPHA1; EPHA10; EPHA2; EPHA4; EPHB6; ERBB2; ERBB3;…
Erythrocytes	17	1539	6.36704	0.796003	0.867572	1	1	1	ARAF; BMP2K; BTK; CDK2; CSNK2A1; NRBP1; PHKG2; PKN1; PRKACA; RPS6KA1; RPS6KA3; SLK; STK38; STK38L; TAOK3; TARDBP; TUT1;
HTB75	4	1277	1.49813	0.226153	0.999987	1	1	1	AXL; EGFR; TARDBP; TUT1;
Smooth muscle cells	128	5124	47.9401	1.79923	5.80178e-14	4.91991e-11	5.99989e-13	2.83654e-12	ABL1; ACVR1; ACVR1B; ACVR1C; ACVR2B; ADRBK1; AKT1; AKT2; AKT3; ALK; AURKB; BLK; BMP2K; BMPR1A; BRAF; CAMK1G; CAMK2A; CAMK4; CAMKK1; CAMKK2; CAMKV; CDK11A; CDK11B; CDK15; CDK17; CDK19; CDK4; CDK6; CDK9; CHUK; CSF1R; CSNK1D; DDR1; DMPK; DYRK1A; EGFR; EIF2AK1; EIF2AK2; EPHA2; ERBB3; ERBB4; ERN1; FER; FGFR1; FGR; FLT3; FRK; GRK6; GSG2; GSK3A; GTF2F1; IGF1R; IKBKB; INSRR; IRAK2; JAK1; KSR1; LIMK1; LIM…
Thymocyte	1	48	0.374532	1.5151	0.489291	1	1	1	PRKCQ;
Urine	42	3267	15.7303	0.926092	0.733326	1	1	1	ACVR1B; ALK; ARAF; AXL; CAMK4; CDK1; CDK4; CSF1R; CSNK2A1; DDR1; DDR2; DMPK; EPHA1; EPHA2; EPHB6; ERBB4; FGFR1; FGFR3; FRK; LCK; LRRK2; MAP3K5; MAPK3; MINK1; NEK9; PDGFRA; PDGFRB; PRKCA; PRKCH; PRKCZ; PTK2B; ROR2; RYK; SLK; SRC; STK11; TGFBR1; TNK1; TUT1; TYRO3; ULK1; YES1;
Heart	114	5507	42.6966	1.491	5.52061e-07	0.000468148	4.92787e-06	2.32973e-05	ABL1; ACVR1C; AKT1; AKT2; AKT3; AR; BMX; CAMK2A; CAMKK2; CDC25C; CDC7; CDK10; CDK14; CDK19; CDK9; CHUK; DAPK2; DDR1; DMPK; DSTYK; DYRK1A; DYRK1B; EIF2AK1; ELK3; EPHA4; ERBB2; ERBB4; ERN1; FASTK; FGFR3; FLT4; GRK6; GRK7; GSK3A; ICK; IKBKB; INSRR; IRAK1; IRAK2; IRAK3; LIMK1; LIMK2; LRRK2; MAP2K5; MAP2K6; MAP2K7; MAP3K1; MAP3K14; MAP3K15; MAP3K2; MAP3K5; MAP3K6; MAP3K7; MAP3K8; MAP4K4; MAPK13; MAPK1…
Amygdala	17	1204	6.36704	1.01748	0.507535	1	1	1	ACVR1C; CAMK1G; CDK19; DYRK1A; EIF2AK1; MAPK13; MAPK14; NEK9; NR3C1; NRBP1; PAK6; PASK; PTK2B; SRC; STK33; STK38L; ZGPAT;
Red blood cells	2	166	0.749064	0.871995	0.67365	1	1	1	PHKG2; PRKCQ;
Thyroid gland	183	7306	68.5393	1.80404	2.51031e-24	2.12875e-21	1.52053e-22	7.18856e-22	ABL1; ACVR1; ACVR1B; ACVR1C; ACVR2B; ADRBK1; AKT1; AKT2; AKT3; ALK; AURKB; AXL; BMP2K; BMPR1A; BMX; BRAF; BTK; CAMK1G; CAMK2A; CAMK2B; CAMK4; CAMKK1; CAMKK2; CAMKV; CDC25C; CDC7; CDK11A; CDK11B; CDK14; CDK15; CDK17; CDK19; CDK2; CDK20; CDK4; CDK6; CDK9; CHUK; CSF1R; CSNK1D; CSNK2A1; DCLK2; DDR1; DMPK; DYRK1A; DYRK2; DYRK4; EGFR; EIF2AK1; EIF2AK2; ELK3; EPHA1; EPHA10; EPHA2; EPHA4; EPHB6; ERBB2; E…
H460	3	736	1.1236	0.294534	0.998072	1	1	1	AXL; EPHA4; TUT1;
Heart muscle	161	6191	60.2996	1.87302	2.12273e-21	1.80007e-18	4.61557e-20	2.18208e-19	ABL1; ACVR1; ACVR1B; ACVR1C; ACVR2B; AKT1; AKT3; ALK; BMP2K; BMPR1A; BMX; BRAF; BTK; CAMK1G; CAMK2A; CAMK2B; CAMK2D; CAMK4; CAMKK1; CAMKK2; CAMKV; CDC25C; CDK11A; CDK11B; CDK14; CDK15; CDK17; CDK19; CDK2; CDK20; CDK4; CDK9; CHUK; CSF1R; CSNK1D; CSNK2A1; DCLK2; DDR1; DMPK; DYRK1A; DYRK2; DYRK4; EGFR; EIF2AK1; ELK3; EPHA1; EPHA10; EPHA2; ERBB2; ERBB3; ERBB4; ERN1; FASTK; FER; FES; FGFR1; FGR; FLT3;…
B Cell	23	2254	8.61423	0.735212	0.9588	1	1	1	BLK; BTK; CAMK2D; CDK9; EPHA4; FGR; IKBKB; ITK; LCK; LYN; MAP4K2; MAPK14; MAPK3; NEK9; PDGFRA; PTK2; PTK2B; RPS6KA3; SLK; TARDBP; TGFBR2; TIE1; TUT1;
Spinal cord	22	1465	8.2397	1.08201	0.382567	1	1	1	ACVR1C; CDK19; DYRK1A; EIF2AK1; KIT; LRRK2; MAPK13; MAPK14; MAST2; NEK9; NRBP1; NTRK2; PAK6; PASK; RIPK3; RPS6KA1; RPS6KA2; SRC; STK38L; TSSK6; UHMK1; ZGPAT;
Malignant glioma	185	7169	69.2884	1.85861	1.33946e-26	1.13586e-23	1.41983e-24	6.71246e-24	ABL1; ACVR1; ACVR1B; ACVR1C; ACVR2B; AKT1; AKT2; AKT3; ALK; AURKB; BLK; BMP2K; BMPR1A; BMX; BRAF; BTK; CAMK1G; CAMK2A; CAMK2B; CAMK4; CAMKK1; CAMKK2; CAMKV; CDC25C; CDC7; CDK1; CDK11A; CDK11B; CDK14; CDK15; CDK17; CDK19; CDK2; CDK20; CDK4; CDK6; CDK9; CHUK; CSF1R; CSNK1D; CSNK2A1; DCLK2; DDR1; DMPK; DYRK1A; DYRK2; DYRK4; EGFR; EIF2AK1; EIF2AK2; ELK3; EPHA1; EPHA10; EPHA2; EPHA4; ERBB2; ERBB3; ERB…
Cervical cancer	181	7426	67.7903	1.75549	2.67495e-22	2.26836e-19	6.87381e-21	3.2497e-20	ABL1; ACVR1; ACVR1B; ACVR1C; ACVR2B; AKT1; AKT2; AKT3; ALK; AR; AURKB; BLK; BMP2K; BMPR1A; BMX; BRAF; BTK; CAMK1G; CAMK2A; CAMK2B; CAMK4; CAMKK1; CAMKK2; CAMKV; CDC25C; CDC7; CDK1; CDK11A; CDK11B; CDK15; CDK17; CDK19; CDK2; CDK20; CDK4; CDK6; CDK9; CHUK; CSF1R; CSNK1D; CSNK2A1; DCLK2; DDR1; DYRK1A; DYRK2; DYRK4; EGFR; EIF2AK1; EIF2AK2; ELK3; EPHA1; EPHA10; EPHA2; EPHA4; EPHB6; ERBB2; ERBB3; ERBB4…
Malignant melanoma	185	7459	69.2884	1.78635	3.11997e-24	2.64573e-21	1.66031e-22	7.84939e-22	ABL1; ACVR1; ACVR1B; ACVR1C; ACVR2B; AKT1; AKT2; AKT3; ALK; AR; AURKB; BLK; BMP2K; BMPR1A; BMX; BRAF; BTK; CAMK1G; CAMK2A; CAMK2B; CAMK4; CAMKK1; CAMKK2; CAMKV; CDC25C; CDC7; CDK1; CDK11A; CDK11B; CDK14; CDK15; CDK17; CDK19; CDK2; CDK20; CDK4; CDK6; CDK9; CHEK1; CHUK; CSF1R; CSNK1D; CSNK2A1; DCLK2; DDR1; DYRK1A; DYRK2; DYRK4; EGFR; EIF2AK1; EIF2AK2; ELK3; EPHA1; EPHA10; EPHA2; EPHA4; EPHB6; ERBB2…
Oesophagus	46	921	17.2285	3.59782	3.2708e-14	2.77364e-11	3.46704e-13	1.6391e-12	ABL1; AKT1; AKT2; AR; BMX; CDC25C; CDC7; CDK1; CDK6; CDK9; CHUK; DDR1; EGFR; EIF2AK2; ELK3; ERBB2; ERBB3; ERBB4; FGFR3; GSK3A; IKBKB; KIT; MAP2K7; MAP3K1; MAP3K14; MAP3K15; MAP3K8; MAPK3; MAPT; PAK6; PASK; PDPK1; PRKCE; PRKCZ; PTK2; RPS6KA1; RPS6KA5; RPS6KA6; SRC; STK33; STK38; TARDBP; TP53RK; VSX2; YES1; ZAP70;
Embryonal carcinoma cells	21	1232	7.86517	1.22819	0.193586	1	0.92225	1	ACVR1; BMPR1A; CAMK2G; EGFR; EPHA1; EPHA2; ERBB2; FGFR1; FGFR3; IGF1R; KIT; LCK; LYN; MAP4K4; PDGFRB; PKMYT1; ROR2; TARDBP; TGFBR1; TUT1; YES1;
ES2	35	3527	13.1086	0.714887	0.991522	1	1	1	AXL; BLK; CAMK2B; CAMK2G; CDK1; CDK9; CSNK2A1; DDR2; EGFR; EIF2AK2; EPHA2; FGFR1; FYN; GTF2F1; LCK; LIMK2; LRRK2; MAP4K4; MAPK14; MAPK3; NEK9; NR3C1; NRBP1; PRKCA; PRKX; RIPK2; SLK; SRC; TARDBP; TBK1; TIE1; TP53RK; TUT1; YES1; ZGPAT;
Ovary	177	8592	66.2921	1.48373	6.5719e-13	5.57297e-10	6.4802e-12	3.06361e-11	ABL1; ACVR1; ACVR1B; ACVR1C; ACVR2B; ADRBK1; AKT1; AKT2; AKT3; ALK; AMHR2; AR; BLK; BMP2K; BMPR1A; BMX; BRAF; BTK; CAMK1G; CAMK2A; CAMK2B; CAMK2D; CAMK2G; CAMK4; CAMKK1; CAMKK2; CAMKV; CDC7; CDK1; CDK10; CDK11A; CDK14; CDK15; CDK17; CDK19; CDK4; CDK6; CDK9; CHEK1; CHUK; CSF1R; CSNK1D; CSNK2A1; DCLK2; DDR1; DMPK; DYRK1A; DYRK2; EGFR; EIF2AK1; EIF2AK2; ELK3; EPHA1; EPHA2; EPHA4; ERBB2; ERBB3; ERBB4…
Liver cancer	187	7697	70.0375	1.74983	1.72281e-23	1.46095e-20	7.30473e-22	3.45342e-21	ABL1; ACVR1; ACVR1B; ACVR1C; ACVR2B; AKT1; AKT2; AKT3; ALK; AR; AURKB; BMP2K; BMPR1A; BMX; BRAF; BTK; CAMK1G; CAMK2A; CAMK2B; CAMK4; CAMKK1; CAMKK2; CAMKV; CDC25C; CDC7; CDK1; CDK11A; CDK11B; CDK14; CDK15; CDK17; CDK19; CDK2; CDK20; CDK4; CDK6; CDK9; CHUK; CSF1R; CSNK1D; CSNK2A1; DCLK2; DDR1; DYRK1A; DYRK2; DYRK4; EGFR; EIF2AK1; EIF2AK2; ELK3; EPHA1; EPHA10; EPHA2; EPHA4; EPHB6; ERBB2; ERBB3; ERB…
Dendritic cells	19	1954	7.1161	0.70066	0.966161	1	1	1	CSF1R; CSNK2A1; FES; FGR; HCK; IKBKB; LIMK2; MAPK14; MAPK3; NEK8; NRBP1; PKN1; PRKACA; RPS6KA1; RPS6KA2; RPS6KA3; SLK; STK3; TARDBP;
OVCAR3	32	3714	11.985	0.620718	0.999523	1	1	1	ADRBK1; AKT2; CAMK2D; CDK1; CDK17; CDK18; CDK2; CDK4; CDK9; CSNK2A1; DDR1; EGFR; EIF2AK2; EPHA1; FGFR1; GTF2F1; MAP2K6; MAP4K4; MAPK14; MAPK3; MRPL28; NRBP1; PRKAA2; RPS6KA1; SLK; SRC; TAOK3; TARDBP; TGFBR1; TP53RK; TUT1; YES1;
Huh7	42	2976	15.7303	1.01665	0.480186	1	1	1	ACVR1; AKT1; ALK; BRAF; CAMK2G; CDKL4; CSF1R; CSNK2A1; DAPK2; DCLK2; DMPK; DPF1; EGFR; EIF2AK2; FLT3; FLT4; GRK7; GSK3A; IKBKB; IRAK2; LIMK2; MAP2K5; MAP3K11; MAPK14; MAPK3; MUSK; PRKCB; PRKCZ; PSKH1; PTK2B; RPS6KA3; SGK2; STK32A; STK36; STK38; TARDBP; TBK1; TSSK3; TUT1; TYK2; YES1; ZNF610;
Serum	138	7685	51.6854	1.29336	6.27903e-05	0.0532462	0.000532462	0.00251729	ABL1; ACVR1C; ADRBK1; AKT1; AKT2; AKT3; AR; ARAF; AURKB; AXL; BMP2K; BMPR1A; BMX; BRAF; BTK; CAMK1G; CAMK2D; CAMK4; CAMKK1; CAMKK2; CAMKV; CDC25C; CDK1; CDK11A; CDK11B; CDK14; CDK2; CDK4; CDK6; CDKL4; CHEK1; CHUK; CSF1R; CSNK2A1; DAPK1; DAPK3; DDR1; DSTYK; DYRK1A; DYRK1B; DYRK2; DYRK4; EGFR; EIF2AK2; EPHA4; ERBB4; FER; FES; FGFR1; FLT4; GRK4; GRK6; GSG2; GSK3A; GTF2F1; HCK; IGF1R; INSRR; ITK; JAK…
Lens	12	1037	4.49438	0.834088	0.781203	1	1	1	BMP2K; BTK; CAMK2D; HCK; PKN1; PRKACA; PRKCB; PRKCG; PRKD2; SRC; TARDBP; TUT1;
Breast	161	6413	60.2996	1.80819	1.09321e-19	9.27044e-17	1.78278e-18	8.42836e-18	ABL1; ACVR1; ACVR1B; ACVR1C; ACVR2B; AKT1; AKT2; AKT3; ALK; AR; AURKB; BLK; BMP2K; BMPR1A; BMX; BRAF; BTK; CAMK1G; CAMK2A; CAMK2B; CAMK4; CAMKK1; CAMKK2; CAMKV; CDC25C; CDC7; CDK1; CDK11A; CDK11B; CDK17; CDK19; CDK20; CDK4; CDK6; CDK9; CHUK; CSF1R; CSNK1D; CSNK2A1; DDR1; DYRK1A; DYRK2; DYRK4; EGFR; EIF2AK1; EIF2AK2; EPHA1; EPHA10; EPHA2; EPHA4; ERBB2; ERBB3; ERBB4; ERN1; FASTK; FER; FES; FGFR1; F…
Hair	2	817	0.749064	0.177182	0.999889	1	1	1	TUT1; YES1;
H520	4	843	1.49813	0.342581	0.997645	1	1	1	FGFR1; TARDBP; TUT1; YES1;
Nipple aspirate fluid	4	754	1.49813	0.383018	0.993719	1	1	1	AXL; FLT3; LYN; NTRK2;
Uterus	17	917	6.36704	1.33593	0.138889	1	0.709503	1	AMHR2; AR; CDK9; ERBB4; FGFR1; FGFR3; KIT; MAPK13; MAPK14; MINK1; NEK8; PASK; RET; SLK; SRC; STK33; UHMK1;
T24	1	123	0.374532	0.591334	0.821878	1	1	1	AXL;
CPE_SCX_fractionated	21	2331	7.86517	0.649133	0.990735	1	1	1	ARAF; CDK9; DDR1; EGFR; EIF2AK2; EPHA1; GSK3A; IKBKB; MAPK14; MAPK3; NEK9; PKN2; PRKCQ; PRKD2; RIPK1; RPS6KA1; SLK; SRC; TARDBP; TUT1; YES1;
CRC	55	4247	20.5993	0.932847	0.744117	1	1	1	ADRBK1; AURKB; AXL; BLK; CAMK2D; CDK1; CDK11A; CDK11B; CDK14; CDK15; CDK17; CDK18; CDK2; CDK20; CDK4; CDK6; CDK9; CSNK2A1; DDR1; DYRK2; EGFR; EIF2AK2; EPHA1; EPHB1; ERBB3; FGFR1; FGFR3; FGR; FRK; FYN; GSK3A; HCK; ICK; INSRR; LCK; LIMK2; LYN; MAP4K4; MAPK13; MAPK14; MAPK3; MAPK4; MAPK7; MERTK; MRPL28; MYLK2; MYLK3; MYLK4; NOC4L; PTK2; RPS6KC1; SLK; SRC; TARDBP; YES1;
Preadipocytes	6	510	2.24719	0.848687	0.714831	1	1	1	AXL; BMPR1A; EGFR; IGF1R; INSRR; TYRO3;
Fetal hepatocytes	59	3784	22.0974	1.12312	0.177101	1	0.858183	1	AKT3; AMHR2; AR; BMP2K; CAMK2B; CAMK2D; CAMK2G; CDK6; CHUK; CSF1R; DAPK1; DAPK3; DCLK2; DMPK; EGFR; EIF2AK1; EIF2AK2; EPHB1; ERBB2; ERBB4; FGFR1; GRK4; GRK7; IGF1R; IKBKB; IRAK2; IRAK3; LCK; LIMK2; LRRK2; MAP4K4; MAPK3; MATK; MEF2B; MERTK; MINK1; NEK8; NEK9; OCA2; PDPK1; PRKCB; PRKD1; PRKD2; PSKH2; PTK2B; RAF1; RIPK2; ROR2; SIK1; STK16; STK3; TARDBP; TBK1; TESK2; TGFBR2; TTK; TUT1; TYK2; ZBTB40;
Amniotic fluid	3	566	1.1236	0.382996	0.986123	1	1	1	AXL; CSF1R; PDGFRB;
Vulva/anal skin	164	6377	61.4232	1.85227	1.77691e-21	1.50682e-18	3.96532e-20	1.87467e-19	ABL1; ACVR1; ACVR1B; ACVR1C; ACVR2B; AKT1; AKT3; ALK; AR; AURKB; BMP2K; BMPR1A; BMX; BRAF; BTK; CAMK1G; CAMK2D; CAMK4; CAMKK1; CAMKK2; CAMKV; CDC25C; CDC7; CDK1; CDK11A; CDK15; CDK17; CDK19; CDK2; CDK20; CDK4; CDK6; CDK9; CHUK; CSF1R; CSNK1D; DDR1; DDR2; DMPK; DYRK1A; DYRK2; DYRK4; EGFR; EIF2AK1; EIF2AK2; ELK3; EPHA1; EPHA10; EPHA2; EPHA4; ERBB2; ERBB3; ERBB4; ERN1; FASTK; FER; FES; FGFR1; FGFR3;…
	90	1183	33.7079	5.47967	8.3857e-43	7.11107e-40	3.55554e-40	1.68093e-39	ABL1; ACVR1; ACVR1B; ACVR2B; ARAF; BMP2K; BMPR1A; BMX; BRAF; BTK; CAMK2A; CAMK2B; CAMK2D; CAMKK2; CDK1; CDK10; CDK2; CDK9; CSF1R; CSNK1D; CSNK2A1; DDR1; DDR2; EGFR; EPHA1; EPHA2; EPHA4; EPHB6; ERBB2; FER; FES; FGFR1; FGR; FLT4; FRK; FYN; GSK3A; HCK; IGF1R; IRAK3; ITK; KIT; LCK; LIMK1; LIMK2; LRRK2; LYN; MAP2K5; MAP3K11; MAP3K2; MAP3K3; MAP4K1; MAP4K2; MAPK14; MAPK3; MERTK; NEK9; PDGFRA; PDGFRB; P…
HH4	43	2684	16.1049	1.15408	0.175153	1	0.853619	1	AKT3; AURKB; BMP2K; CAMK2B; CAMK2D; CDK18; CHEK1; CLK2; EGFR; EPHA10; EPHB1; EPHB6; FASTK; FES; GRK4; IGF1R; IRAK3; LMX1B; MAPK4; MRPL28; MUSK; NEK9; PDGFRB; PDPK1; PIM3; PKN2; PRKAA2; PRKCG; PRKCZ; RPS6KA2; RPS6KA5; RPS6KC1; TARDBP; TESK1; TIE1; TNNI3K; TSSK6; TTK; TUT1; TYK2; YES1; ZGPAT; ZNF569;
Ramos	90	1566	33.7079	4.1395	4.2476e-33	3.60197e-30	1.20066e-30	5.67629e-30	ABL1; ACVR1; ACVR1B; ACVR2B; ADRBK1; ARAF; AURKB; BMP2K; BMPR1A; BRAF; BTK; CAMK2A; CAMK2B; CAMK2D; CAMK4; CAMKK2; CDK1; CDK10; CDK17; CDK2; CDK6; CDK9; CHEK1; CHUK; CLK2; CSNK1D; CSNK2A1; DDR1; DYRK1A; EIF2AK1; EPHA4; FER; FGR; FLT3; FYN; GSK3A; GTF2F1; IGF1R; IRAK1; LCK; LIMK1; LIMK2; LYN; MAP2K5; MAP3K11; MAP3K12; MAP3K2; MAP3K3; MAP3K5; MAP3K9; MAP4K1; MAP4K2; MAP4K4; MAPK14; MAPK3; NEK9; NLK…
Leukocytes	62	2845	23.221	1.56975	0.000157135	0.133251	0.00131931	0.00623725	AKT1; AKT2; AKT3; BLK; BMX; BTK; CAMK2B; CAMK2G; CDC7; CDK10; CDK14; CDK9; CLK2; CLK3; DAPK2; DDR1; DYRK1A; FES; FGR; GRK6; GSK3A; GTF2F1; HCK; IKBKB; IRAK2; IRAK3; ITK; LYN; MAP2K7; MAP3K14; MAP3K2; MAP3K5; MAPK13; MAPK14; MINK1; NR3C1; NRBP1; PASK; PIM1; PIM2; PIM3; PRKACA; PRKCB; PRKCQ; PTK2B; RIPK1; RIPK2; RIPK3; RPS6KA3; RPS6KC1; SGK3; SLK; SRC; STK11; STK33; STK38; TAOK3; TARDBP; TBK1; TESK…
Renal cancer	178	7121	66.6667	1.80034	4.90045e-23	4.15558e-20	1.53911e-21	7.27636e-21	ABL1; ACVR1; ACVR1B; ACVR1C; ACVR2B; AKT1; AKT2; AKT3; ALK; AR; AURKB; BLK; BMP2K; BMPR1A; BMX; BRAF; BTK; CAMK1G; CAMK2A; CAMK2B; CAMK2D; CAMK4; CAMKK1; CAMKK2; CAMKV; CDC25C; CDC7; CDK1; CDK11A; CDK11B; CDK14; CDK15; CDK17; CDK19; CDK20; CDK4; CDK6; CDK9; CHUK; CSF1R; CSNK1D; CSNK2A1; DCLK2; DDR1; DYRK1A; DYRK2; DYRK4; EGFR; EIF2AK1; EIF2AK2; ELK3; EPHA1; EPHA2; EPHA4; EPHB6; ERBB2; ERBB3; ERBB…
Aorta	8	530	2.99625	1.08843	0.455673	1	1	1	DYRK1A; MAPK13; MAPK14; NRBP1; PASK; SRC; STK16; STK33;
Thyroid	41	889	15.3558	3.32227	1.23263e-11	1.04527e-08	1.20146e-10	5.6801e-10	AKT1; AKT2; BRAF; CAMK2A; CDC25C; CDC7; CDK6; CDK9; CHUK; EGFR; EIF2AK2; ELK3; ERBB2; ERBB4; GSK3A; HCK; IKBKB; LYN; MAP2K7; MAP3K1; MAP3K14; MAP3K15; MAP3K8; MAP3K9; MAPK3; PDPK1; PRKACG; PRKCA; PRKCB; PRKCZ; PTK2; RPS6KA1; RPS6KA5; RPS6KA6; SRC; STK38; TARDBP; TP53RK; VAV3; YES1; ZAP70;
hupo46_reference_cam	17	1042	6.36704	1.17567	0.280793	1	1	1	CAMK2A; CAMK2B; CAMK2D; CAMK2G; CAMKK1; EGFR; FYN; LCK; MAPK3; MAPT; PRKCA; PRKCB; PRKCG; PRKCH; PRKCQ; SRC; YES1;
Substantia nigra	16	1146	5.99251	1.00613	0.527889	1	1	1	ACVR1C; CAMK1G; CDK19; DYRK1A; EIF2AK1; MAPK13; MAPK14; NEK9; NRBP1; PAK6; PASK; PTK2B; RIPK3; SRC; STK38L; ZGPAT;
Vagina	135	5307	50.5618	1.83218	1.1066e-15	9.38393e-13	1.28547e-14	6.07726e-14	ABL1; ACVR1B; ACVR1C; ACVR2B; AKT1; AKT2; AKT3; ALK; AURKB; BMP2K; BMX; BRAF; BTK; CAMK1G; CAMK2B; CAMKK1; CAMKK2; CAMKV; CDC25C; CDC7; CDK1; CDK11A; CDK17; CDK2; CDK20; CDK4; CDK6; CDK9; CHUK; CSF1R; CSNK1D; CSNK2A1; DCLK2; DDR1; DDR2; DYRK1A; DYRK2; DYRK4; EGFR; EIF2AK1; EIF2AK2; EPHA1; EPHA10; EPHA2; ERBB2; ERBB3; ERBB4; ERN1; FASTK; FER; FES; FGFR1; FGFR3; FGR; FLT3; GRK4; GSG2; GSK3A; IGF1R;…
Monocytes	12	745	4.49438	1.161	0.340815	1	1	1	AXL; CDK9; DDR1; FES; FGR; ITK; LYN; MAPK14; NR3C1; PRKCB; PTK2B; TYK2;
MDA-MB-468	5	770	1.87266	0.46859	0.983593	1	1	1	CSNK2A1; EGFR; MAPK13; PRKACA; TUT1;
Platelets	38	2168	14.2322	1.26267	0.0779612	1	0.437822	1	AKT2; AURKB; AURKC; BTK; CDK2; EPHA4; EPHB1; ERBB2; FER; FES; FGR; FYN; GTF2F1; ITK; LCK; LYN; MAP4K2; MAPK14; MAPT; MERTK; MYLK3; NRBP1; PDGFRA; PDPK1; PKN2; PRKACA; PRKCA; PRKCB; PTK2; PTK2B; SRC; STK36; STK38; TAOK3; TARDBP; TIE1; TYK2; YES1;
HL60	4	545	1.49813	0.529898	0.946985	1	1	1	EGFR; IGF1R; MERTK; TGFBR2;
TOV21G	4	904	1.49813	0.319465	0.998821	1	1	1	AXL; MERTK; TARDBP; TUT1;
Oral mucosa	154	5861	57.6779	1.89247	1.86789e-20	1.58397e-17	3.29994e-19	1.5601e-18	ABL1; ACVR1; ACVR1B; ACVR1C; ACVR2B; AKT1; AKT2; AKT3; ALK; AURKB; BLK; BMP2K; BMPR1A; BMX; BRAF; CAMK1G; CAMK2B; CAMK4; CAMKK1; CAMKK2; CAMKV; CDC25C; CDC7; CDK1; CDK11A; CDK11B; CDK14; CDK15; CDK17; CDK19; CDK2; CDK20; CDK4; CDK6; CDK9; CHUK; CSF1R; CSNK1D; CSNK2A1; DDR1; DDR2; DMPK; DYRK1A; DYRK2; DYRK4; EGFR; EIF2AK1; EIF2AK2; ELK3; EPHA1; EPHA10; EPHA2; EPHA4; ERBB2; ERBB3; ERBB4; ERN1; FAST…
Esophagus	153	6034	57.3034	1.82627	1.23097e-18	1.04386e-15	1.71125e-17	8.09021e-17	ABL1; ACVR1; ACVR1B; ACVR1C; ACVR2B; AKT1; AKT2; AKT3; ALK; AR; AURKB; BMP2K; BMX; BRAF; CAMK1G; CAMK2B; CAMKK1; CAMKK2; CAMKV; CDC25C; CDC7; CDK1; CDK11A; CDK11B; CDK17; CDK19; CDK2; CDK20; CDK4; CDK6; CDK9; CHUK; CSF1R; CSNK1D; CSNK2A1; DCLK2; DDR1; DYRK1A; DYRK2; DYRK4; EGFR; EIF2AK1; EIF2AK2; ELK3; EPHA1; EPHA10; EPHA2; ERBB2; ERBB3; ERBB4; ERN1; FASTK; FER; FES; FGFR1; FGFR3; FGR; FLT3; FRK;…
Corpus callosum	9	988	3.37079	0.656773	0.935202	1	1	1	CDK19; DYRK1A; EIF2AK1; NEK9; PAK6; PASK; PTK2B; RIPK3; ZGPAT;
NB4	6	711	2.24719	0.608767	0.932885	1	1	1	FLT3; IGF1R; MERTK; ROR2; TGFBR1; TIE1;
Mammary gland	27	760	10.1124	2.55951	8.02e-06	0.00680096	7.0113e-05	0.00033147	AMHR2; AR; CAMK2B; CDK11B; CDK2; CDK9; DAPK2; DYRK1A; ERBB2; ERBB4; FGFR1; FRK; IGF1R; KIT; MAPK13; MAPK14; NEK8; NEK9; NRBP1; PAK6; PASK; PTK2; PTK6; RPS6KA2; RYK; SRC; STK33;
031003_BALF2	7	1102	2.62172	0.458125	0.994957	1	1	1	CAMK2B; CAMK2D; CAMK2G; MAPK3; PRKD2; TARDBP; TUT1;
Tears	3	510	1.1236	0.42505	0.974254	1	1	1	MAPK3; PRKAA2; TUT1;
Cellzome_Abl_inhibitors_NatureBiotechnology_exp144	13	186	4.86891	5.03724	2.10244e-06	0.00178287	1.85715e-05	8.77997e-05	CAMK2D; FLT3; LIMK2; MAP3K5; PAK7; PRKCA; PRKD2; RIPK2; RPS6KA1; RPS6KA4; TGFBR1; TYK2; YES1;
CaOV3	29	3355	10.8614	0.622739	0.999029	1	1	1	AXL; CAMK2A; CAMK2B; CAMK2D; CAMK2G; CDK1; CDK2; CSNK1D; CSNK2A1; DDR1; EGFR; EIF2AK2; GSK3A; GTF2F1; MAPK14; MAPK3; MATK; MEF2B; MRPL28; NR3C1; NRBP1; PRKACA; RPS6KA1; SLK; TAOK3; TARDBP; TP53RK; TUT1; YES1;
Cerebrospinal fluid	16	1059	5.99251	1.08879	0.400436	1	1	1	AXL; CAMK2A; CAMK2D; CAMK2G; CSF1R; DDR1; EGFR; EPHA10; EPHA4; ERBB4; FGFR1; KIT; NTRK2; NTRK3; STYK1; ZBTB40;
Melanoma	13	1826	4.86891	0.513128	0.99833	1	1	1	CAMKK2; CAMKV; CDK11B; CDK17; DYRK2; EIF2AK2; ERN1; FGR; ICK; NPR2; PRKACA; PRKCA; ZBTB40;
Subthalamic nucleus	13	882	4.86891	1.06232	0.452975	1	1	1	ACVR1C; CDK19; DYRK1A; EIF2AK1; MAPK13; MAPK14; NEK9; NRBP1; PTK2B; RIPK3; SRC; STK38L; ZGPAT;
Melanocytes	3	71	1.1236	3.0528	0.0760733	1	0.430068	1	BRAF; KIT; PRKACA;
15_clinprot_c3	3	749	1.1236	0.289422	0.99835	1	1	1	NEK8; TARDBP; TUT1;
Ubiquitous	32	1052	11.985	2.19138	2.63811e-05	0.0223712	0.000228277	0.00107922	ABL1; ACVR1; ACVR1B; AKT2; CDK9; CHUK; CLK2; CSNK1D; CSNK2A1; EGFR; EIF2AK2; ELK3; ERN1; FER; JAK1; MAP3K2; MAP3K5; MAP3K7; MAPK3; MAPK7; MINK1; NRBP1; PASK; PRKCZ; PSKH1; PTK2; SLK; TAOK3; TARDBP; TGFBR1; TGFBR2; UHMK1;
Cortex	11	683	4.11985	1.16095	0.350926	1	1	1	CAMK2A; CAMK2B; CAMK2G; CAMKV; MAPK3; MAPT; PRKCA; PRKCB; PRKCE; PRKCG; TUT1;
N06cs122	19	123	7.1161	11.13	7.17615e-15	6.08537e-12	8.11383e-14	3.83594e-13	ABL1; CDK1; DDR1; DDR2; DYRK1A; DYRK2; EGFR; FLT4; FYN; GSK3A; HCK; LCK; LYN; MAPK13; MAPK14; MAPK3; MAPK7; PDGFRA; PTK2;
17_wcx	11	1438	4.11985	0.551414	0.99145	1	1	1	AR; BMP2K; BTK; HCK; NOC4L; PTK2; SRC; TARDBP; TNNI3K; TUT1; YES1;
hupo1_b2-edta_cam	5	316	1.87266	1.1418	0.447538	1	1	1	CSF1R; KIT; LCK; MAPK4; TBK1;
H23	4	896	1.49813	0.322317	0.998708	1	1	1	AXL; DDR1; TARDBP; TUT1;
YTS	28	1888	10.4869	1.06847	0.385417	1	1	1	ADRBK1; CAMK2D; CAMK2G; CDK1; CDK18; CDK9; CHEK1; CLK3; EIF2AK2; FYN; GRK6; JAK1; KSR1; LCK; LYN; MAP3K11; MAP4K1; PDGFRA; PDGFRB; PKMYT1; PRKCH; RAF1; RPS6KA3; TARDBP; TBK1; TNK2; TTK; ZAP70;
hupo1_b2-hep_cam	5	848	1.87266	0.425489	0.992437	1	1	1	FYN; ITK; LCK; MAP4K4; YES1;
Ileum	1	201	0.374532	0.361873	0.940702	1	1	1	PASK;
Embryonic stem cells	39	3047	14.6067	0.922049	0.736053	1	1	1	ACVR1; AXL; BMPR1A; CAMK2G; CDK1; CDK17; CDK2; CHEK1; CSNK1D; DDR1; DUS3L; EGFR; EPHA1; EPHA2; ERBB2; ERBB3; ERN1; FGFR1; FYN; GRK6; IGF1R; KIT; LCK; LYN; MAP2K6; MAP4K4; MAPK14; NOC4L; NPR2; PAK7; PKMYT1; PRKACA; RAF1; RPS6KA1; TARDBP; TGFBR1; TTK; TYRO3; YES1;
Saliva	7	912	2.62172	0.553567	0.972142	1	1	1	AKT1; AKT2; AKT3; CAMK4; DDR1; SLK; YES1;
Nuclear	16	1319	5.99251	0.874169	0.747856	1	1	1	ADRBK1; CAMK2B; CAMK2D; CAMK2G; CDK9; CSNK2A1; EIF2AK2; MAPK3; NRBP1; PKN1; PRKD1; PRKD2; SRC; TARDBP; TUT1; YES1;
N06CS98-2	25	165	9.3633	10.9158	5.47287e-19	4.641e-16	7.86609e-18	3.71882e-17	ABL1; AXL; CDK1; DDR1; DDR2; DYRK1A; EGFR; FER; FGFR1; FGR; FYN; GSK3A; HCK; JAK1; LCK; LYN; MAPK13; MAPK14; MAPK3; MAPK7; PDGFRA; PTK2; PTK6; TNK2; TYK2;
MV4-11	68	382	25.4682	12.8218	4.94244e-56	4.19119e-53	4.19119e-53	1.98145e-52	ABL1; AURKB; BMP2K; BTK; CAMK2D; CAMK2G; CDK1; CDK10; CDK17; CDK18; CDK19; CDK2; CDK4; CDK6; CDK9; CHUK; CLK2; CSNK1D; CSNK2A1; ERN1; FER; FGR; FLT3; FYN; GSK3A; HCK; IGF1R; IKBKB; IRAK1; IRAK3; KIT; LIMK1; LYN; MAP2K5; MAP2K6; MAP3K1; MAP3K11; MAP3K2; MAP4K1; MAP4K2; MAP4K4; MAPK3; NEK9; PDPK1; PHKG2; PKN1; PRKACA; PRKCB; PRKCQ; PRKD2; PTK2; PTK2B; RIPK2; RPS6KA1; RPS6KA3; RPS6KA4; RPS6KA5; SLK;…
Caudate nucleus	15	1204	5.61798	0.897848	0.704978	1	1	1	ACVR1C; CAMK1G; CAMKK2; CDK19; DYRK1A; EIF2AK1; MAPK13; MAPK14; NEK9; NRBP1; PAK6; PASK; PTK2B; SRC; ZGPAT;
Retina	4	364	1.49813	0.793383	0.747127	1	1	1	GRK7; MRPL28; MYO3B; VSX2;
Medulla oblongata	12	473	4.49438	1.82863	0.0332329	1	0.213496	1	ACVR1C; DYRK1A; LRRK2; MAPK13; MAPK14; NRBP1; PAK6; PASK; RIPK3; RPS6KA2; SRC; TSSK6;
Bladder cancer cells	3	369	1.1236	0.587463	0.8894	1	1	1	DDR1; EGFR; EPHA2;
PC3(AR)6	1	262	0.374532	0.277623	0.974991	1	1	1	DDR1;
Neutrophils	5	393	1.87266	0.918092	0.639656	1	1	1	CDK9; FES; LYN; NR3C1; PRKCB;
Parathyroid	45	782	16.8539	4.14523	3.79025e-16	3.21413e-13	4.59162e-15	2.17076e-14	ABL1; AKT1; AKT2; BMX; BRAF; CAMK2A; CAMK4; CDC7; CDK1; CDK6; CDK9; CHUK; EIF2AK2; ELK3; ERBB3; ERBB4; FGFR1; FGFR3; FLT4; GSK3A; HCK; IKBKB; MAP2K7; MAP3K1; MAP3K14; MAP3K15; MAP3K8; MAPK3; MAPT; PDGFRB; PDPK1; PRKACG; PRKCB; PRKCZ; PTK2; RET; RPS6KA1; RPS6KA5; RPS6KA6; SRC; TARDBP; TP53RK; VAV3; YES1; ZAP70;
HEK293	65	4439	24.3446	1.05474	0.333728	1	1	1	ADRBK1; AKT1; AKT2; AR; ARAF; BMP2K; CAMK2D; CAMK2G; CAMKK1; CDK1; CDK11B; CDK2; CDK4; CDK9; CHEK1; CHUK; CSNK1D; CSNK2A1; DYRK1A; EGFR; EIF2AK2; EPHA2; ERBB2; GSK3A; GTF2F1; IGF1R; IRAK1; KSR1; LYN; MAP2K7; MAP4K4; MAPK13; MAPK14; MAPK7; MAPT; MEF2B; NEK9; NOC4L; NR3C1; PDPK1; PHKG2; PKN1; PKN2; PRKACA; PRKCA; PRKCG; PRKCZ; PRKD2; PTK2; RAF1; RIPK1; RPS6KA1; RPS6KA3; RPS6KA4; SLK; STK3; STK38; T…
A549	8	997	2.99625	0.578609	0.969686	1	1	1	GTF2F1; MAP3K6; MAP4K4; MAPK3; MAST2; MOS; PRKAA2; RPS6KA2;
Semen	3	966	1.1236	0.224407	0.999888	1	1	1	DDR1; PRKACA; TUT1;
Keratinocytes	8	250	2.99625	2.30742	0.0238842	1	0.157006	0.742271	CAMK2G; CDK1; CDK2; DDR1; DYRK1A; GSK3A; PTK2; PTK2B;
Fetus	56	2992	20.9738	1.3482	0.0107913	1	0.0768991	0.363552	AKT3; AR; ARAF; CAMK2A; CDK10; CDK11B; CDK19; DSTYK; DYRK1A; DYRK2; EGFR; EIF2AK1; EPHA4; ERBB2; ERBB3; FES; FLT4; GSG2; GSK3A; KIT; LIMK1; LIMK2; MAP2K5; MAP3K7; MAPK13; MAPK14; MAST2; MOS; MRPL28; NEK9; NR3C1; NRBP1; NTRK2; PAK6; PASK; PDGFRA; PIM1; PRKX; PTK2B; PTK6; RAF1; RIPK3; RPS6KA5; RPS6KA6; SRC; STK16; STK33; STK36; STK38; TAOK3; TESK2; TNK1; TNNI3K; UHMK1; VSX2; ZGPAT;
MCF7	1	317	0.374532	0.229457	0.988545	1	1	1	TUT1;
Corneal epithelial cells	3	28	1.1236	7.73937	0.00670851	1	0.0499019	0.235919	ERBB3; FGFR1; FGFR3;
051503_BAL20_gly_hui	5	268	1.87266	1.34629	0.316064	1	1	1	BLK; MAPK4; TBK1; YES1; ZAP70;
Adducin	4	486	1.49813	0.594225	0.908511	1	1	1	CDK6; LCK; PRKCB; TUT1;
MCF10A	4	661	1.49813	0.436906	0.983222	1	1	1	AXL; PTK2; SLK; TUT1;
22_mars	1	196	0.374532	0.371104	0.936361	1	1	1	PRKCH;
041803_BALF3	9	1103	3.37079	0.588298	0.97251	1	1	1	BTK; DAPK3; EPHA4; MAPK14; NEK9; RPS6KA3; SLK; SRC; TUT1;
Macrophages	9	274	3.37079	2.36816	0.0146862	1	0.100435	0.474821	CSF1R; FES; FGR; IGF1R; LYN; NR3C1; PTK2; PTK2B; TYK2;
Muscle	34	904	12.7341	2.70948	1.30055e-07	0.000110287	1.17326e-06	5.54679e-06	ACVR1C; AKT1; AR; CAMK2G; CDK10; CLK2; CLK3; DMPK; EPHA4; ERBB4; FGFR1; FLT4; IKBKB; INSRR; IRAK1; IRAK2; IRAK3; LMX1B; MAP2K5; MAP2K7; MAP3K12; MAP3K2; MAP3K6; MAP3K8; MAP4K4; MUSK; MYLK2; PKN1; PRKCA; PRKD1; PTK2; RPS6KA3; STK11; TBK1;
MicroProt2	3	561	1.1236	0.38641	0.985325	1	1	1	CAMK2D; CAMK2G; TGFBR2;
Hypothalamus	2	147	0.749064	0.984694	0.607967	1	1	1	NR3C1; PTK2B;
Ventricles	2	151	0.749064	0.958611	0.622583	1	1	1	PASK; TNNI3K;
Endometrium	53	1202	19.8502	3.17616	4.27477e-14	3.625e-11	4.47531e-13	2.11577e-12	AKT1; AKT2; AR; BMX; BRAF; BTK; CAMK2A; CDC25C; CDC7; CDK1; CDK2; CDK6; CDK9; CHUK; EGFR; EIF2AK2; ELK3; ERBB2; ERBB3; ERBB4; FGFR1; FLT4; GSK3A; HCK; IKBKB; KIT; LYN; MAP2K7; MAP3K1; MAP3K15; MAP3K8; MAP3K9; MAPK3; MAPT; NEK9; PDGFRB; PDPK1; PIM2; PRKACG; PRKCA; PRKCE; PRKCZ; PTK2; RPS6KA1; RPS6KA5; RPS6KA6; SRC; STK38; TARDBP; TP53RK; VAV3; YES1; ZAP70;
Thalamus	15	1141	5.61798	0.947421	0.624253	1	1	1	ACVR1C; CAMK1G; CDK19; DYRK1A; EIF2AK1; MAPK13; MAPK14; NEK9; NRBP1; PAK6; PASK; PTK2B; SRC; STK38L; ZGPAT;
Putamen	14	527	5.24345	1.91457	0.0158536	1	0.107551	0.508462	ACVR1C; CAMK1G; CAMKK2; DYRK1A; LRRK2; MAPK13; MAPK14; NRBP1; PAK6; PASK; RIPK3; RPS6KA1; RPS6KA2; SRC;
PT45	1	361	0.374532	0.20149	0.993877	1	1	1	AXL;
Colorectal cancer cells	5	561	1.87266	0.64316	0.892837	1	1	1	EGFR; EPHA2; EPHB1; MAP4K4; MINK1;
Jejunum	1	194	0.374532	0.374929	0.934538	1	1	1	PASK;
Temporal lobe	12	477	4.49438	1.81329	0.0350942	1	0.222262	1	ACVR1C; CAMK1G; DYRK1A; LRRK2; MAPK13; MAPK14; NRBP1; PAK6; PASK; RPS6KA1; RPS6KA2; SRC;
RMUG	2	499	0.749064	0.290094	0.993012	1	1	1	EGFR; TUT1;
DU145	8	941	2.99625	0.613042	0.952933	1	1	1	AXL; EGFR; EPHA2; LCK; LYN; PRKCA; TUT1; YES1;
Lacrimal glands	1	453	0.374532	0.16057	0.998355	1	1	1	MAPK3;
Cervix	4	104	1.49813	2.77665	0.0570223	1	0.341616	1	FGFR1; FGFR3; FLT4; KIT;
Megakaryocytes	4	47	1.49813	6.14336	0.0040566	1	0.0307143	0.145206	FES; MATK; PRKCQ; PTK2B;
Epidermis	1	95	0.374532	0.765604	0.735934	1	1	1	FGFR1;
Cervico-vaginal fluid	9	565	3.37079	1.14847	0.385275	1	1	1	BMP2K; CAMK2D; CAMKV; CDK9; DCLK2; LYN; MAP4K4; SLK; TUT1;
Uterine cervix	49	902	18.3521	3.91314	1.51937e-16	1.28843e-13	1.92303e-15	9.09142e-15	AKT1; AKT2; AR; BMX; BRAF; BTK; CAMK2A; CAMK4; CDC25C; CDC7; CDK1; CDK6; CDK9; CHUK; EGFR; EIF2AK2; ELK3; ERBB2; ERBB3; ERBB4; GSK3A; HCK; IKBKB; LYN; MAP2K7; MAP3K1; MAP3K14; MAP3K15; MAP3K8; MAP3K9; MAPK3; PDPK1; PRKACG; PRKCB; PRKCE; PRKCZ; PTK2; RET; RPS6KA1; RPS6KA5; RPS6KA6; SRC; STK38; TARDBP; TP53RK; VAV3; VSX2; YES1; ZAP70;
Thymus	13	456	4.86891	2.05473	0.0116289	1	0.0821773	0.388506	AKT3; BLK; CDK11B; CHEK1; FLT3; IKBKB; PRKCQ; PRKG2; RPS6KC1; SLK; STK11; TAOK3; TARDBP;
Vermiform appendix	5	286	1.87266	1.26156	0.365384	1	1	1	FGFR3; MAPK13; MAPK14; PASK; SRC;
Distal convoluted tubule	1	17	0.374532	4.27631	0.211633	1	0.986068	1	CDK9;
Mast cells	1	62	0.374532	1.17304	0.58032	1	1	1	KIT;
Cardiomyocytes	2	31	0.749064	4.66817	0.0686312	1	0.393238	1	FGFR1; TNNI3K;
Bone	2	112	0.749064	1.29238	0.462231	1	1	1	PDGFRA; PTK2B;
Trachea	12	612	4.49438	1.41331	0.146131	1	0.733247	1	AR; CAMK2G; DYRK1A; MAPK13; MAPK14; MINK1; NRBP1; PASK; RET; SRC; STK33; UHMK1;
Astrocytes	1	58	0.374532	1.25392	0.556102	1	1	1	CDK9;
050603_BALF11	9	1019	3.37079	0.636793	0.948142	1	1	1	CDK1; CSNK2A1; FYN; LCK; LYN; PRKCQ; SLK; TTK; TUT1;
HCC78	27	249	10.1124	7.81196	1.31022e-16	1.11107e-13	1.70934e-15	8.08115e-15	AXL; CDK1; CDK2; DDR1; DYRK1A; EGFR; EPHA2; EPHA4; ERBB2; ERBB3; FER; FRK; FYN; GSK3A; ICK; LCK; LYN; MAPK13; MAPK14; MAPK3; MINK1; PTK2; PTK2B; PTK6; TNK2; TYK2; TYRO3;
RBC	1	267	0.374532	0.272424	0.976702	1	1	1	PRKACA;
T-lymphocytes	2	18	0.749064	8.03775	0.0253837	1	0.16558	0.782805	ITK; PTK2B;
Hepatocytes	2	73	0.749064	1.98274	0.269262	1	1	1	CDK9; FGFR3;
Nervous system	12	212	4.49438	4.0798	4.30758e-05	0.0365283	0.000368973	0.00174437	ALK; CSF1R; FGFR3; FYN; INSRR; MAPT; NTRK1; NTRK2; NTRK3; PRKCG; PTK2B; YES1;
Transverse colon	1	48	0.374532	1.5151	0.489291	1	1	1	STK33;
Occipital lobe	10	359	3.74532	2.00807	0.028952	1	0.187415	0.886032	ACVR1C; CAMK1G; CAMKK2; LRRK2; MAPK13; MAPK14; NRBP1; PAK6; PASK; SRC;
N06CS97	26	270	9.73783	6.93765	8.77401e-15	7.44036e-12	9.6628e-14	4.56824e-13	ABL1; AXL; CDK1; CDK2; DDR2; DYRK1A; DYRK2; EGFR; EPHA2; FGR; FLT4; FYN; GSK3A; HCK; JAK1; LCK; LYN; MAPK13; MAPK14; MAPK3; MAPK7; PDGFRA; PRKCG; PTK2; PTK2B; TNK2;
Blood vessels	5	130	1.87266	2.77532	0.0351216	1	0.222262	1	BMX; EPHA2; FGFR1; PTK2; TIE1;
Cartilage	2	89	0.749064	1.62633	0.35102	1	1	1	FGFR3; PTK2B;
Intestine	16	508	5.99251	2.26971	0.00206439	1	0.0159146	0.0752386	AKT1; AKT3; ALK; ERBB4; FGFR3; IKBKB; IRAK1; IRAK2; KIT; MAP2K7; MAP3K14; MYO3B; PRKCH; STK11; TBK1; YES1;
Blood	3	227	1.1236	0.954934	0.613101	1	1	1	CDK9; LCK; TNK1;
Adipocytes	7	147	2.62172	3.43418	0.0045091	1	0.0338382	0.159975	AXL; BMPR1A; CDK9; IGF1R; INSRR; RPS6KA1; TYRO3;
Pituitary gland	17	494	6.36704	2.47982	0.000575089	0.487676	0.00455772	0.0215473	CAMK2B; CDK10; CDK9; DYRK1A; FGFR1; MAPK13; MAPK14; NR3C1; NRBP1; PAK6; PASK; PITX2; RET; RPS6KA6; SRC; STK16; STK33;
Caecum	1	36	0.374532	2.01999	0.395775	1	1	1	PASK;
Vulva	46	838	17.2285	3.95417	1.0054e-15	8.52583e-13	1.18414e-14	5.59822e-14	ABL1; AKT1; AR; BMX; BRAF; BTK; CDC25C; CDC7; CDK1; CDK6; CDK9; CHUK; EGFR; EIF2AK2; ELK3; ERBB4; FGFR3; GSK3A; IKBKB; KIT; MAP2K7; MAP3K1; MAP3K14; MAP3K15; MAP3K8; MAP3K9; MAPK3; MAPT; NEK9; PDPK1; PRKACG; PRKCE; PRKCZ; PTK2; RET; RPS6KA1; RPS6KA5; RPS6KA6; SRC; STK38; TARDBP; TP53RK; VAV3; VSX2; YES1; ZAP70;
B cells	6	533	2.24719	0.812066	0.753195	1	1	1	EPHB1; FGR; LCK; PRKCB; SRC; TYK2;
SH-SY5Y	3	537	1.1236	0.403679	0.980844	1	1	1	MAP3K9; PDGFRA; PRKCA;
Adrenal cortex	3	82	1.1236	2.64333	0.105818	1	0.55391	1	AR; CAMK2B; FGFR1;
Hematopoietic stem cells	25	200	9.3633	9.00563	6.2054e-17	5.26218e-14	8.22216e-16	3.88715e-15	BMX; BTK; CDK1; CDK2; CDK4; CDK6; CSF1R; EPHB6; FES; FGR; FLT3; HCK; ITK; KIT; LYN; MAP2K6; MAP4K1; NTRK1; PIM2; PTK2B; RET; TGFBR1; TGFBR2; TIE1; TYK2;
Panc1	2	346	0.749064	0.418369	0.954795	1	1	1	AXL; EGFR;
Frontal lobe	13	480	4.86891	1.952	0.017102	1	0.115099	0.544148	ACVR1C; CAMK1G; CAMKK2; DYRK1A; LRRK2; MAPK13; MAPK14; NRBP1; PAK6; PASK; RPS6KA1; RPS6KA2; SRC;
Beta cells	1	15	0.374532	4.8461	0.189257	1	0.906725	1	CAMK2B;
Pons	2	134	0.749064	1.08022	0.557535	1	1	1	PAK6; PASK;
Lymphocytes	9	468	3.37079	1.38651	0.204692	1	0.969715	1	ADRBK1; CDK2; FGR; GSK3A; NR3C1; PIM1; PTK2B; VAV3; ZAP70;
01_glyco	6	667	2.24719	0.648924	0.904853	1	1	1	CAMK2D; CSF1R; EPHA2; ERBB2; SRC; YES1;
Nucleus accumbens	2	166	0.749064	0.871995	0.67365	1	1	1	PAK6; PASK;
Bronchoalveolar fluid	1	186	0.374532	0.391054	0.926708	1	1	1	CDK6;
Bronchial epithelial cells	1	69	0.374532	1.05405	0.619576	1	1	1	CDK9;
Frontal cortex	1	113	0.374532	0.64366	0.79497	1	1	1	GRK6;
Kidney cancer	2	352	0.749064	0.411238	0.957887	1	1	1	GSG2; MAP3K6;
Umbilical vein endothelial cells	3	178	1.1236	1.21779	0.450245	1	1	1	GRK6; PRKCZ; RIPK1;
Eyes	2	122	0.749064	1.18646	0.507052	1	1	1	NR3C1; OCA2;
H2228	23	168	8.61423	9.86355	1.48501e-16	1.25929e-13	1.90802e-15	9.02045e-15	ABL1; ALK; AXL; CDK1; CDK2; DYRK1A; EGFR; EPHA2; FGFR1; FYN; GSK3A; ICK; LCK; LYN; MAPK14; MAPK3; MAPK7; PTK2; PTK2B; TNK2; TYK2; TYRO3; YES1;
Ureter	1	11	0.374532	6.60672	0.142591	1	0.719747	1	FGFR1;
Granulocytes	1	89	0.374532	0.817212	0.712709	1	1	1	PIM1;
Ventricular septum	3	82	1.1236	2.64333	0.105818	1	0.55391	1	PASK; STK33; TNNI3K;
Peripheral blood leukocytes	2	125	0.749064	1.15799	0.520019	1	1	1	MAP3K8; PRKCQ;
BJ635	27	175	10.1124	11.1151	1.23176e-20	1.04453e-17	2.22241e-19	1.05068e-18	ABL1; AXL; BTK; CDK1; CDK2; DDR1; DDR2; DYRK1A; DYRK2; EGFR; FER; FRK; FYN; GSK3A; KIT; LCK; LYN; MAPK13; MAPK14; MAPK3; MAPK7; PDGFRA; PTK2; PTK2B; PTK6; TYK2; YES1;
Mesenchymal stromal cells	1	178	0.374532	0.408629	0.917946	1	1	1	PDGFRB;
Osteoblasts	2	52	0.749064	2.78331	0.162655	1	0.79729	1	NR3C1; PDGFRA;
H1703	21	138	7.86517	10.964	3.58313e-16	3.0385e-13	4.40362e-15	2.08188e-14	ABL1; CDK1; CDK2; DYRK1A; EGFR; EPHA2; FER; FGFR1; FYN; GSK3A; KIT; LCK; MAPK14; MAPK3; PDGFRA; PTK2; RIPK2; TNK2; TYK2; TYRO3; YES1;
Ependymal cells	1	9	0.374532	8.07325	0.118264	1	0.615265	1	CDK9;
T lymphocytes	1	32	0.374532	2.27242	0.360956	1	1	1	BLK;
Cellzome_Abl_inhibitors_NatureBiotechnology_exp142	26	83	9.73783	22.5664	1.77151e-28	1.50224e-25	3.75559e-26	1.77551e-25	BRAF; BTK; CAMK2B; CAMK2D; CDK2; CSNK2A1; FER; FYN; GSK3A; LCK; LIMK1; LYN; MAP3K2; MAP4K1; MAPK14; MAPK3; NEK9; PRKCQ; PTK2; PTK2B; RIPK2; RPS6KA1; RPS6KA3; TBK1; TNK2; TYK2;
Adipose tissue	2	155	0.749064	0.933874	0.636776	1	1	1	RPS6KA2; RPS6KA4;
WM1158	1	212	0.374532	0.343097	0.94924	1	1	1	AR;
Occipital pole	4	129	1.49813	2.23858	0.105272	1	0.55391	1	CAMK1G; DYRK1A; RPS6KA1; RPS6KA2;
Chondrocytes	1	65	0.374532	1.1189	0.597615	1	1	1	CDK9;
N06cs110	11	87	4.11985	9.11318	3.31767e-08	2.81338e-05	3.02514e-07	1.43018e-06	ABL1; DYRK1A; DYRK2; GSK3A; ICK; LYN; MAPK13; MAPK14; MAPK3; MAPK7; YES1;
Parotid gland	1	32	0.374532	2.27242	0.360956	1	1	1	KIT;
Peripheral blood cells	2	140	0.749064	1.03392	0.581368	1	1	1	MAP3K7; NR3C1;
Arteries	1	30	0.374532	2.42386	0.342805	1	1	1	PTK2;
Ascending colon	1	50	0.374532	1.45451	0.50341	1	1	1	STK33;
Neurons	2	68	0.749064	2.12851	0.24351	1	1	1	CAMK1G; CDK9;
Hematopoietic cells	8	22	2.99625	26.2098	3.36155e-10	2.85059e-07	3.13252e-09	1.48095e-08	BMX; CSF1R; FES; HCK; ITK; KIT; PTK2B; RET;
Purkinje cells	1	35	0.374532	2.07769	0.387252	1	1	1	CDK9;
Nasal mucosa	1	24	0.374532	3.02957	0.28521	1	1	1	NR3C1;
Umbilical cord	2	34	0.749064	4.25639	0.0806164	1	0.44105	1	CDK9; TNK1;
Malignant ascites	1	5	0.374532	14.519	0.0675284	1	0.389551	1	ERBB2;
Cornea	6	82	2.24719	5.27788	0.00098177	0.832541	0.00763799	0.0361098	BMPR1A; DDR1; DDR2; FGFR1; FGFR3; RET;
Spermatocytes	1	42	0.374532	1.73149	0.44449	1	1	1	PRKACA;
Collecting duct	1	23	0.374532	3.16123	0.275134	1	1	1	CDK9;
Eosinophils	4	100	1.49813	2.88771	0.0507114	1	0.309376	1	CDK9; FGR; LYN; NR3C1;
Submandibular gland	2	25	0.749064	5.78808	0.0467235	1	0.287112	1	FGFR1; FGFR3;
Myocardium	1	30	0.374532	2.42386	0.342805	1	1	1	CDK9;
Granulosa lutein cells	1	28	0.374532	2.59693	0.32414	1	1	1	CDK9;
Proximal convoluted tubule	1	32	0.374532	2.27242	0.360956	1	1	1	CDK9;
Leydig cells	1	36	0.374532	2.01999	0.395775	1	1	1	CDK9;
Thyroid follicular cells	1	12	0.374532	6.05662	0.154503	1	0.761735	1	AR;
BOB_Sensitivity	1	129	0.374532	0.563832	0.836302	1	1	1	DPF1;
Pulmonary artery	1	15	0.374532	4.8461	0.189257	1	0.906725	1	FGFR1;
Cellzome_Abl_inhibitors_NatureBiotechnology_exp143	26	87	9.73783	21.529	7.19673e-28	6.10283e-25	1.22057e-25	5.77041e-25	BRAF; BTK; CAMK2D; CDK2; CSNK2A1; FER; FYN; GSK3A; LCK; LIMK1; LYN; MAP3K2; MAP3K3; MAPK14; MAPK3; NEK9; NLK; PDPK1; PRKCQ; PRKD2; PTK2B; RIPK2; RPS6KA1; RPS6KA3; TBK1; TNK2;
Skin fibroblasts	3	162	1.1236	1.33806	0.391203	1	1	1	AR; NEK8; NR3C1;
Urothelium	1	33	0.374532	2.20357	0.369844	1	1	1	FGFR1;
Islets of Langerhans	2	135	0.749064	1.07222	0.561573	1	1	1	CAMK2G; FGFR3;
Atrium	2	146	0.749064	0.991438	0.604247	1	1	1	PASK; TNNI3K;
Corpus luteum	1	12	0.374532	6.05662	0.154503	1	0.761735	1	AR;
Parietal lobe	2	111	0.749064	1.30403	0.457619	1	1	1	PAK6; PASK;
Cardiac muscle	1	64	0.374532	1.13639	0.59193	1	1	1	CAMK2D;
Uterine myometrium	6	77	2.24719	5.62056	0.000704148	0.597118	0.00552887	0.0261386	ADRBK1; AR; EGFR; GRK6; KIT; PRKCB;
Sebaceous glands	1	29	0.374532	2.50741	0.333537	1	1	1	CDK9;
Neural stem cells	2	67	0.749064	2.16027	0.238368	1	1	1	GRK4; TSSK3;
Spermatozoa	2	102	0.749064	1.41907	0.415125	1	1	1	CSNK2A1; TSSK2;
Large intestine	1	39	0.374532	1.86465	0.420642	1	1	1	CDK9;
Oocytes	1	38	0.374532	1.91371	0.412469	1	1	1	MOS;
Hair follicle	1	83	0.374532	0.87628	0.68745	1	1	1	CDK9;
Glomerulus	1	44	0.374532	1.65281	0.459843	1	1	1	CDK9;
Bile duct	3	31	1.1236	6.99064	0.00892817	1	0.0647102	0.305927	CAMK2G; FGFR1; FGFR3;
Mammary epithelium	3	75	1.1236	2.89001	0.0864081	1	0.469706	1	CAMK2D; CDK1; PTK2B;
Schwann cells	2	17	0.749064	8.51028	0.0227689	1	0.150844	0.713139	FGFR1; FGFR3;
B lymphocytes	4	27	1.49813	10.6923	0.00049584	0.420472	0.00408225	0.0192995	BLK; IKBKB; ITK; PTK2B;
Malignant pleural effusions	1	31	0.374532	2.3457	0.351944	1	1	1	PKN2;
N06BJ504	16	78	5.99251	14.7806	9.69352e-15	8.2201e-12	1.05386e-13	4.98228e-13	ABL1; CDK1; CDK2; DDR1; DDR2; DYRK1A; DYRK2; EGFR; FYN; GSK3A; LCK; MAPK14; MAPK3; PDGFRA; PTK2; TYK2;
Sweat glands	2	37	0.749064	3.91137	0.0931901	1	0.50048	1	CDK9; KIT;
Vascular endothelial cells	3	63	1.1236	3.4404	0.0572046	1	0.341616	1	ADRBK1; CDK9; PTK2;
Sublingual gland	2	10	0.749064	14.4615	0.0080302	1	0.0587035	0.27753	FGFR1; FGFR3;
Vas deferens	2	17	0.749064	8.51028	0.0227689	1	0.150844	0.713139	AR; FGFR1;
Dorsal root ganglion	1	32	0.374532	2.27242	0.360956	1	1	1	NTRK2;
Microglia	1	17	0.374532	4.27631	0.211633	1	0.986068	1	CDK9;
Endocervix	1	12	0.374532	6.05662	0.154503	1	0.761735	1	FGFR1;
Veins	1	10	0.374532	7.26673	0.130513	1	0.670756	1	PTK2;
Myofibroblast	1	5	0.374532	14.519	0.0675284	1	0.389551	1	CDK9;
High endothelial venule endothelial cell	2	10	0.749064	14.4615	0.0080302	1	0.0587035	0.27753	FGFR1; PTK2B;
Chromaffin cell	1	7	0.374532	10.3766	0.0932498	1	0.50048	1	CDK9;
Coronary arteries	2	32	0.749064	4.52233	0.0725565	1	0.412939	1	FGFR1; FGFR3;
Plasma cells	1	21	0.374532	3.46216	0.254554	1	1	1	BTK;
Breast cancer cells	1	36	0.374532	2.01999	0.395775	1	1	1	ERBB2;
Oviduct	2	11	0.749064	13.148	0.00972533	1	0.0698905	0.330418	FGFR1; FGFR3;
Medulla	1	5	0.374532	14.519	0.0675284	1	0.389551	1	RPS6KA1;
Basophils	1	28	0.374532	2.59693	0.32414	1	1	1	CDK9;
Respiratory system	1	4	0.374532	18.1397	0.0543964	1	0.329487	1	FGFR3;
Skin and Appendages	1	1	0.374532	72.0198	0.0138846	1	0.0957244	0.452552	FGFR1;
Submucosa	2	6	0.749064	24.0865	0.00277677	1	0.0212135	0.10029	FGFR1; FGFR3;
Colon epithelium	1	32	0.374532	2.27242	0.360956	1	1	1	CAMK2G;
PNS	1	17	0.374532	4.27631	0.211633	1	0.986068	1	NTRK2;
Cingulate gyrus	1	11	0.374532	6.60672	0.142591	1	0.719747	1	DYRK1A;
Prostate gland	1	5	0.374532	14.519	0.0675284	1	0.389551	1	PTK6;
Germ cell layer	1	6	0.374532	12.1032	0.0804787	1	0.44105	1	CDK9;
Gall bladder epithelium	1	6	0.374532	12.1032	0.0804787	1	0.44105	1	CDK9;
Conjunctiva	1	10	0.374532	7.26673	0.130513	1	0.670756	1	ERBB3;
Sympathetic (chain) ganglionic trunk	2	3	0.749064	48.093	0.000570912	0.484134	0.00455772	0.0215473	FGFR1; FGFR3;
Stratum spinosum	1	6	0.374532	12.1032	0.0804787	1	0.44105	1	FGFR1;
Muscularis mucosa	1	3	0.374532	24.1661	0.0410801	1	0.254277	1	FGFR3;
Corneal endothelium	1	5	0.374532	14.519	0.0675284	1	0.389551	1	FGFR1;
Pituitary acidophil	2	3	0.749064	48.093	0.000570912	0.484134	0.00455772	0.0215473	FGFR1; FGFR3;
Corneal endothelial cell	1	3	0.374532	24.1661	0.0410801	1	0.254277	1	FGFR3;
Chief cell	1	3	0.374532	24.1661	0.0410801	1	0.254277	1	FGFR1;
Pituitary basophil	2	3	0.749064	48.093	0.000570912	0.484134	0.00455772	0.0215473	FGFR1; FGFR3;
Muscularis externa	1	1	0.374532	72.0198	0.0138846	1	0.0957244	0.452552	FGFR1;
Myometrium	2	2	0.749064	72.0198	0.000192069	0.162874	0.00159681	0.00754915	GRK6; KIT;
Pancreatic adenocarcinoma	1	1	0.374532	72.0198	0.0138846	1	0.0957244	0.452552	EGFR;

## Sheet: Transcription factor
Analysis: Transcription factor
Dataset name: Client proteins of Hsp90-Cdc37
Number of genes in the dataset: 267
Number of genes in the dataset (which are available in Transcription factor database) :248
Number of genes in background: 19230
Is analysis quantitative: No
						Corrected p-values
Transcription factor	No. of genes in the dataset	No.of genes in the background dataset	Percentage of genes	Fold enrichment	P-value (Hypergeometric test)	Bonferroni method	BH method	Q-value (Storey-Tibshirani method)
MAFB	6	352	2.24719	1.22962	0.36393	1	0.514563	0.458551	ERBB4; LRRK2; MAP3K6; PITX2; ULK1; YES1;
NFIC	56	2040	20.9738	1.97736	4.43938e-07	9.32269e-05	3.31789e-05	2.95673e-05	ABL1; AKT2; AKT3; AXL; BMP2K; CAMK1G; CAMK2A; CAMK2G; CAMKK1; CDK2; CDK6; CLK3; CSNK2A1; DAPK1; DCLK2; DDR1; EPHA4; EPHB1; FGR; FLT3; FYN; IKBKB; INSRR; JAK1; LIMK1; MAP2K5; MAP2K6; MAP3K11; MAP3K5; MAP3K8; MAP4K2; MAPK14; MERTK; MYLK3; MYO3B; NEK8; NLK; NPR2; NTRK1; NTRK3; PAK7; PIM1; PIM3; PRKCE; PRKCH; PTK2; RIPK2; RPS6KA1; RPS6KA4; RPS6KA6; SIK1; SRC; STK36; TYRO3; VSX2; ZAP70;
NR1H3	29	1020	10.8614	2.04831	0.000206389	0.0433417	0.00206389	0.00183923	AKT3; ALK; AMHR2; CDC25C; CDK17; CSF1R; DCLK2; DYRK1B; KIT; MAP2K7; MAP3K15; MAP3K6; MAP4K2; MAPK4; MAST2; MERTK; NEK11; NTRK3; PKN1; PRKCB; RAF1; RPS6KA1; RPS6KA5; STK11; STK32B; TAOK3; TGFBR2; TIE1; ZBTB40;
PITX3	8	265	2.99625	2.17682	0.0322032	1	0.0889826	0.0792966	CAMK1G; CDK17; EPHA2; EPHA4; ERBB4; NLK; PRKD1; RPS6KA1;
RXRA	27	1113	10.1124	1.74774	0.00348092	0.730994	0.0178291	0.0158884	ABL1; AKT3; CAMK1G; CDC25C; CDK18; DYRK1A; EPHA2; LIMK1; MAP2K7; MAP3K15; MAP3K6; MAP4K2; MAST2; MERTK; NEK11; NR3C1; PASK; PKN1; PRKACA; PRKCB; RAF1; RPS6KA1; STK11; STK32B; TAOK3; TIE1; ZBTB40;
SOAT1	24	1261	8.98876	1.37128	0.072634	1	0.154072	0.137301	ACVR1; AKT2; AKT3; CAMK2B; CAMK2G; CHUK; CSNK2A1; DYRK2; EPHA10; FGFR1; FYN; JAK1; LIMK2; MAP2K5; MAP3K14; MAST2; MERTK; NRBP1; PIM2; RIPK1; STK3; STYK1; TP53RK; YES1;
STAT1	24	1261	8.98876	1.37128	0.072634	1	0.154072	0.137301	ACVR1; AKT2; AKT3; CAMK2B; CAMK2G; CHUK; CSNK2A1; DYRK2; EPHA10; FGFR1; FYN; JAK1; LIMK2; MAP2K5; MAP3K14; MAST2; MERTK; NRBP1; PIM2; RIPK1; STK3; STYK1; TP53RK; YES1;
DLX2	3	171	1.1236	1.26764	0.424662	1	0.576192	0.513471	CDKL4; MAP3K5; PRKD1;
DLX3	9	413	3.37079	1.57114	0.122767	1	0.234373	0.208861	CDK14; EIF2AK1; ERBB4; MYLK2; MYLK4; RPS6KA3; RPS6KA6; STK3; TNNI3K;
ETS1	56	2496	20.9738	1.61611	0.0001683	0.0353429	0.00176714	0.00157479	ACVR1; ACVR1B; AKT2; AURKB; BMX; BTK; CAMK2A; CAMK2B; CAMK4; CDK14; CDK17; CHUK; CSNK2A1; DAPK3; EGFR; ELK3; EPHA2; EPHA4; FRK; FYN; IKBKB; JAK1; LCK; LIMK1; LIMK2; MAP3K1; MAP3K7; MAP4K1; MAP4K2; MAPK3; MAST2; MUSK; NEK8; NTRK1; PKN1; PRKACA; PRKCB; PRKCE; PRKCH; PRKD2; PRKG2; PTK2B; RPS6KA1; RPS6KA2; RPS6KA4; SRC; STK38; STK38L; TESK1; TIE1; TNNI3K; TYRO3; UHMK1; VAV3; YES1; ZAP70;
HNF1A	15	831	5.61798	1.30085	0.181868	1	0.313052	0.278975	CDK6; EPHA4; ERBB2; ERBB4; FRK; FYN; MYO3B; NEK8; NTRK2; PDGFRA; PITX2; PRKD1; SGK2; SRC; STK33;
HOXC9	12	573	4.49438	1.5095	0.103975	1	0.20795	0.185314	ABL1; ACVR1; DAPK1; EPHA4; ERBB4; LIMK1; LRRK2; MAP3K7; MYO3B; PDIK1L; PRKCE; STK33;
IRF1	18	811	6.74157	1.59934	0.0344761	1	0.0904998	0.0806486	BLK; CAMK1G; CDK19; CDK6; EIF2AK2; ERBB4; JAK1; MAP3K11; MAP3K5; MUSK; PDGFRB; PITX2; PKN2; PTK2; RAF1; STYK1; VAV3; YES1;
LHX3	25	1210	9.3633	1.4886	0.0306189	1	0.0857329	0.0764006	AKT3; BMX; CDK14; CDK19; CDK4; CHUK; DAPK1; DYRK1A; EPHA4; FYN; ICK; IRAK3; JAK1; MAP3K8; MUSK; NTRK2; PITX2; PRKAA2; PRKD1; RPS6KA6; SGK3; STK33; VAV3; YES1; ZBTB40;
MEF2A	46	1835	17.2285	1.80578	5.77608e-05	0.0121298	0.000808651	0.000720626	ACVR1; ACVR1B; ACVR1C; AKT3; CAMK2B; CAMK2G; CDK15; CDK19; DYRK1A; ELK3; EPHA10; EPHA4; EPHB1; ERBB4; ERN1; FGR; FRK; FYN; GRK7; JAK1; KIT; LRRK2; MAP2K5; MAP3K12; MAP3K7; MUSK; MYLK3; NLK; NPR2; PAK6; PDGFRA; PDGFRB; PITX2; PRKAA2; PRKCA; PRKCB; PRKCE; PRKCG; RPS6KA3; RYK; SLK; STK3; STK33; TNNI3K; TYRO3; VAV3;
NKX6-1	35	1408	13.1086	1.79076	0.000573002	0.12033	0.00429751	0.00382971	AKT3; BMP2K; BMX; CAMK2A; CDC7; CDK14; CDK15; CLK2; DAPK1; EPHA4; ERBB4; FYN; KSR2; LIMK1; MAP2K5; MAP3K3; MAP3K7; MUSK; MYO3B; NLK; NTRK2; PDGFRA; PITX2; PRKAA2; PRKCE; PRKCH; PRKD1; RPS6KA6; SGK3; STK11; STK33; STK38L; TNNI3K; TYRO3; VAV3;
OTX2	6	324	2.24719	1.33588	0.295466	1	0.432532	0.385449	ACVR1C; CDK6; DDR2; EPHA4; PRKD1; ROR2;
PHOX2A	8	442	2.99625	1.30513	0.272774	1	0.409162	0.364623	CAMK2D; CDC7; CDK14; DAPK1; DYRK1A; PRKD1; STK32C; VAV3;
POU2F1	44	2209	16.4794	1.43485	0.00875936	1	0.0360679	0.0321418	ACVR1; AKT3; ALK; BMX; BTK; CAMK4; CAMKK1; CDC25C; CDK14; CDK15; CDK17; CDK2; CDK4; CDK6; CLK2; DAPK3; EGFR; ELK3; EPHA4; ERBB4; FYN; ICK; MAP2K5; MAP2K6; MAP3K15; MAP3K7; MAP3K8; MAPT; MAST2; MYLK4; MYO3B; NEK11; NTRK2; PDGFRB; PIM2; PITX2; PRKCA; PRKCB; PRKCE; PRKCH; SLK; STK33; TNNI3K; ZNF569;
POU3F2	18	789	6.74157	1.64393	0.0273455	1	0.0815222	0.0726482	AKT3; CDK14; CDK4; CLK2; DAPK1; DYRK1A; ERBB4; FYN; MAP2K5; MAP3K8; NTRK2; PITX2; PRKAA2; PRKCB; STK32C; STK33; VAV3; VSX2;
SRF	12	462	4.49438	1.87216	0.0284809	1	0.0819312	0.0730127	ABL1; ACVR1; BMPR1A; CAMK2G; DAPK3; DMPK; FGFR1; FYN; GRK6; MAPK14; MAPK4; RPS6KA2;
ARID3A	19	1250	7.1161	1.09527	0.375136	1	0.523154	0.466207	ACVR1; BMX; CAMK2B; CDK14; CLK2; EPHA4; ERBB4; ICK; MAP3K5; MAP3K8; MAST2; NRBP1; PRKAA2; RPS6KA3; SGK3; STK33; STK38; VAV3; ZBTB40;
EHF	21	753	7.86517	2.00945	0.0019878	0.417437	0.0110433	0.00984118	BLK; BTK; CDK17; CDKL4; CHUK; FRK; GTF2F1; JAK1; MAP3K11; MAP3K7; MUSK; PDPK1; PHKG2; PITX2; PTK2B; RIPK1; RPS6KA1; RPS6KC1; STK38L; TBK1; UHMK1;
FOXA1	11	804	4.11985	0.986229	0.563312	1	0.695855	0.620109	CAMK2D; CDK19; DYRK2; ELK3; EPHA4; MAP3K7; PDGFRA; PITX2; PRKD1; STK33; TNNI3K;
ATF1	23	1037	8.61423	1.59803	0.0183391	1	0.0601751	0.0536249	ACVR1C; AKT3; AURKB; CAMK1G; CAMK2D; CDK18; CDK2; CSNK1D; ELK3; EPHA2; EPHA4; ERBB4; GTF2F1; IKBKB; MAP3K2; NOC4L; NTRK2; PITX2; PRKCZ; PRKD2; RIPK2; SIK1; STK38L;
CREB1	20	973	7.49064	1.48109	0.0521801	1	0.124521	0.110966	AURKB; BLK; CAMK2D; CAMK2G; CSNK1D; EPHA2; GTF2F1; IKBKB; JAK1; MAP3K5; NOC4L; NTRK2; PINK1; PITX2; PRKCE; PRKCZ; PSKH1; RPS6KA6; SIK1; STK38L;
JDP2	16	763	5.99251	1.51117	0.0671122	1	0.149931	0.133611	CAMK2D; CDK6; CSNK1D; DAPK3; EPHA2; FYN; GTF2F1; IKBKB; NOC4L; PAK6; PINK1; PITX2; PRKCZ; ROR2; SLK; STK38L;
NFYA	46	2544	17.2285	1.30252	0.0354873	1	0.0920041	0.0819891	ACVR1; AURKB; AURKC; BLK; CDK1; CDK14; CDK15; DAPK1; DAPK3; DDR2; DYRK1B; EPHA4; EPHB1; ERBB4; FER; KIT; LIMK2; MAP2K6; MAP3K12; MAP3K14; MAP3K3; MAP3K6; MAP3K9; MAPK7; MAST2; NRBP1; PASK; PDGFRB; PDIK1L; PIM2; PIM3; PITX2; PRKACA; PRKCB; PRKCZ; PRKD2; PSKH1; PTK2B; RPS6KA1; RPS6KA2; RPS6KA5; RPS6KA6; STK11; TESK1; TTK; VSX2;
PLAU	23	1037	8.61423	1.59803	0.0183391	1	0.0601751	0.0536249	ACVR1C; AKT3; AURKB; CAMK1G; CAMK2D; CDK18; CDK2; CSNK1D; ELK3; EPHA2; EPHA4; ERBB4; GTF2F1; IKBKB; MAP3K2; NOC4L; NTRK2; PITX2; PRKCZ; PRKD2; RIPK2; SIK1; STK38L;
RORA	29	1168	10.8614	1.78876	0.00176207	0.370035	0.0105383	0.00939119	ACVR1; AKT3; CAMK2G; CAMKK2; CDK17; CDK6; DCLK2; EPHA4; ERBB4; FYN; JAK1; MAP3K1; MAP3K7; MAP3K8; MAPK3; MAST2; MATK; MYO3B; NLK; NTRK1; PIM1; PITX2; PKN1; PRKAA2; PRKCQ; PRKD1; SGK3; SLK; STK38;
YY1	29	1317	10.8614	1.58639	0.00937828	1	0.0378738	0.0337511	ACVR1; ALK; CHUK; CLK2; CSNK2A1; DYRK1B; DYRK2; ELK3; EPHA10; ERN1; FGFR1; IRAK1; LRRK2; MAP2K5; MAPT; MAST2; NR3C1; PDIK1L; PIM1; PRKACA; PRKCQ; PSKH1; RAF1; RPS6KA3; RPS6KA6; STK11; STK36; YES1; ZBTB40;
ELK1	39	1986	14.6067	1.41464	0.0166964	1	0.0574795	0.0512227	ACVR1; AURKB; BMP2K; BMPR1A; BMX; CDK10; CDK14; CDK17; CDK6; CLK2; DYRK2; ELK3; EPHA4; FER; FGR; FYN; JAK1; LIMK2; MAP3K3; MAP3K7; MAP4K1; MAP4K2; NEK8; NOC4L; NTRK2; PRKACA; PRKCE; PRKD1; PTK2B; RPS6KA1; STK36; STK38L; TBK1; TESK1; TIE1; UHMK1; YES1; ZGPAT; ZNF334;
GABPA	48	2702	17.9775	1.27967	0.0416335	1	0.104084	0.0927539	ADRBK1; AKT1; AKT2; ALK; AURKB; BMP2K; CAMK1G; CDK17; CDK4; CHUK; CSNK2A1; DAPK1; DAPK3; EGFR; ELK3; EPHA2; GTF2F1; LCK; MAP3K1; MAP3K11; MAP3K6; MAP3K7; MAP4K2; MAPK3; MUSK; NEK8; NR3C1; PHKG2; PIM2; PKMYT1; PRKACA; PTK2B; PTK6; RAF1; RIPK1; RPS6KA3; RYK; STK36; STK38L; TBK1; TESK1; TNK1; TP53RK; TSSK3; TTK; UHMK1; ZNF334; ZNF610;
CTCF	60	2605	22.4719	1.65908	4.33431e-05	0.00910205	0.000650147	0.000579376	ACVR1C; ADRBK1; AKT2; ALK; BMP2K; BTK; CAMK1G; CAMK2B; CAMK2G; CAMKK2; CDC7; CDK14; CDK17; CDK18; CDK9; CDKL4; CLK3; DAPK2; EPHA10; EPHA2; EPHA4; EPHB1; ERBB3; FES; FGFR1; FGFR3; FGR; FLT4; FYN; INSRR; IRAK1; KSR2; LIMK2; LRRK2; MAP3K14; MAP3K15; MAP3K5; MAP3K6; MAPT; MERTK; MYLK4; MYO3B; NEK8; NLK; NPR2; NTRK1; PHKG2; PIM1; PIM2; PKN1; PRKACA; PRKCB; PRKCQ; PTK2B; PTK6; SRC; STK32B; TESK1; TSSK1…
FEV	14	526	5.24345	1.91821	0.0156205	1	0.0546719	0.0487206	ABL1; BMX; CAMK2G; CDK14; CDK17; FGR; LCK; MAP2K5; MAP2K6; MAPK14; MYO3B; NTRK1; PDGFRA; RPS6KA3;
HERPUD1	10	421	3.74532	1.71235	0.0700878	1	0.152096	0.13554	AKT3; BLK; FGR; MAP3K5; MAPK3; MATK; MYO3B; PAK6; RET; STK36;
KLF7	79	4448	29.588	1.27929	0.00838922	1	0.0359538	0.0320401	ABL1; ACVR2B; AKT1; AKT3; BLK; BTK; CAMK2D; CAMK2G; CAMKK1; CDC25C; CDK2; CDK4; CHEK1; CLK2; CSNK2A1; DAPK3; DDR1; DMPK; EIF2AK1; EPHA2; ERBB4; FES; FGR; FYN; GRK6; GSK3A; HCK; JAK1; KIT; LCK; LIMK1; LIMK2; MAP2K7; MAP3K1; MAP3K11; MAP3K12; MAP3K14; MAP3K6; MAP3K7; MAP3K9; MAP4K1; MAPK4; MAPK7; MINK1; NEK8; NLK; NRBP1; NTRK1; NTRK3; PAK7; PDIK1L; PIM2; PINK1; PKN1; PRKACA; PRKCB; PRKCG; PRKCH; PR…
MAF	10	466	3.74532	1.547	0.115924	1	0.225408	0.200872	AKT3; BTK; CDK14; CDK15; DYRK1A; EPHA2; FGR; IGF1R; PIM1; TBK1;
NANOG	2	204	0.749064	0.709572	0.778141	1	0.888096	0.791424	FGR; PITX2;
NR5A1	30	1129	11.236	1.91434	0.000499688	0.104934	0.00403594	0.00359661	ACVR1; AKT2; ALK; AMHR2; CAMK2G; DCLK2; EPHA4; FGR; GSK3A; LCK; LIMK2; MAP2K7; MAP3K12; MAP3K15; MAPK13; MAST2; MATK; MYLK4; NRBP1; NTRK2; PDPK1; PKN1; PRKAA2; PRKCE; PRKCQ; PTK2B; RPS6KA1; RPS6KA5; TESK1; ZBTB40;
RFX1	56	2158	20.9738	1.86924	2.62726e-06	0.000551724	9.1954e-05	8.19445e-05	ABL1; ACVR1; ACVR1C; AKT2; AKT3; CAMK2A; CAMKK1; CDC7; CDK1; CDK10; CDK15; CDK18; CDK4; CDK9; DAPK1; DDR1; DYRK1A; DYRK1B; DYRK2; EPHA10; ERBB3; ERBB4; FGR; GTF2F1; ITK; MAP3K1; MAP3K14; MAP3K5; MAP3K8; MAST2; MATK; MYLK3; MYO3B; OCA2; PAK6; PDGFRB; PIM2; PITX2; PRKACA; PRKACG; PRKCB; PRKCG; PRKCQ; RAF1; RPS6KA2; RPS6KA4; SIK1; SRC; STK16; STK32C; STK33; STK36; TGFBR2; TNNI3K; VAV3; ZBTB40;
RREB1	57	2136	21.3483	1.92221	8.57298e-07	0.000180033	4.50082e-05	4.01089e-05	ACVR1C; ADRBK1; AKT2; AMHR2; ARAF; CAMK1G; CAMK2A; CAMK2G; CAMKK2; CDK17; CDK2; CDK4; CDK6; CLK2; CSNK2A1; DAPK2; DDR1; DDR2; ELK3; EPHA10; EPHA2; ERBB2; ERBB3; FGR; FYN; HIPK4; IGF1R; JAK1; MAP2K7; MAP3K1; MAP3K12; MAP3K5; MAP3K7; MAP3K8; MAPK3; MYLK2; NPR2; NTRK2; PAK6; PDGFRA; PIM1; PITX2; PRKCB; PRKCE; PRKD2; RAF1; RET; RPS6KA1; SRC; TIE1; TNK1; TYRO3; VAV3; WNK4; YES1; ZAP70; ZGPAT;
SF1	30	1129	11.236	1.91434	0.000499688	0.104934	0.00403594	0.00359661	ACVR1; AKT2; ALK; AMHR2; CAMK2G; DCLK2; EPHA4; FGR; GSK3A; LCK; LIMK2; MAP2K7; MAP3K12; MAP3K15; MAPK13; MAST2; MATK; MYLK4; NRBP1; NTRK2; PDPK1; PKN1; PRKAA2; PRKCE; PRKCQ; PTK2B; RPS6KA1; RPS6KA5; TESK1; ZBTB40;
SP1	140	7140	52.4345	1.41225	2.1329e-07	4.47908e-05	3.31789e-05	2.95673e-05	ABL1; ACVR1; ACVR1B; ACVR1C; ACVR2B; AKT1; AKT2; AKT3; ALK; AMHR2; AR; ARAF; AURKB; AXL; BLK; BTK; CAMK2D; CAMK2G; CAMKK1; CDC25C; CDK14; CDK17; CDK18; CDK19; CDK2; CDK4; CDK6; CDK9; CHEK1; CLK2; CSNK1D; CSNK2A1; DAPK2; DAPK3; DCLK2; DDR1; DMPK; DSTYK; DUS3L; DYRK1A; DYRK1B; DYRK2; EGFR; EIF2AK1; ELK3; EPHA10; EPHA4; ERBB2; ERBB3; ERBB4; FER; FGFR1; FGR; FLT3; FYN; GRK6; GSK3A; HIPK4; ICK; IGF1R;…
SP4	87	4345	32.5843	1.44222	0.000104335	0.0219103	0.00128884	0.00114855	ACVR1B; ACVR1C; ACVR2B; AKT1; AKT3; AMHR2; AR; CAMKK1; CDK2; CDK4; CDK6; CDK9; CLK2; CSNK1D; DAPK2; DAPK3; DSTYK; DUS3L; DYRK1A; DYRK1B; ELK3; EPHA10; EPHA4; EPHB1; ERBB2; ERBB3; ERBB4; FER; FGFR1; FGFR3; FGR; FYN; GRK6; IGF1R; INSRR; IRAK1; JAK1; LIMK2; LMX1B; MAP2K7; MAP3K1; MAP3K11; MAP3K12; MAP3K14; MAP3K6; MAP3K7; MAP3K8; MAP3K9; MAP4K1; NEK8; NLK; NR3C1; NRBP1; NTRK1; NTRK2; NTRK3; PAK7; PD…
TCF3	55	2140	20.5993	1.8513	4.41592e-06	0.000927344	0.000132478	0.000118057	ACVR1; ACVR1C; ACVR2B; AMHR2; AR; BMX; CAMK2A; CAMK2B; CAMK2G; CDK18; CDK2; CDKL4; DAPK2; DCLK2; DDR1; DMPK; DYRK1B; EPHA2; EPHA4; ERBB3; ERBB4; FES; FGR; FLT3; GRK6; IGF1R; KIT; KSR2; LCK; LIMK1; LIMK2; MAP2K5; MAP2K6; MAP3K1; MAP3K12; MAP3K3; MAP3K8; MAPK14; MAPK3; MATK; MUSK; NLK; NPR2; NTRK2; PDIK1L; PIM2; PRKACA; PRKCB; PRKCG; PRKCH; PRKD2; PRKG2; RPS6KA1; STK38L; ZAP70;
OTX1	11	848	4.11985	0.935058	0.634359	1	0.748401	0.666935	ACVR1C; CDC7; DSTYK; EPHA4; FGFR1; LRRK2; MAST2; PRKD1; RPS6KC1; STK33; TBK1;
PITX1	11	848	4.11985	0.935058	0.634359	1	0.748401	0.666935	ACVR1C; CDC7; DSTYK; EPHA4; FGFR1; LRRK2; MAST2; PRKD1; RPS6KC1; STK33; TBK1;
E2F1	26	1188	9.73783	1.57678	0.0146268	1	0.0524184	0.0467125	ACVR1B; CAMK2G; CDC7; CDK14; CDK19; CDK6; CHEK1; CLK2; ERBB4; FER; FGFR3; IKBKB; MAP3K7; MAPK4; PIM1; PITX2; PRKCE; PRKD1; PRKX; RIPK1; RPS6KA3; RPS6KA5; SGK3; TYRO3; VAV3; WNK4;
EGR1	77	3215	28.839	1.72511	4.73984e-07	9.95367e-05	3.31789e-05	2.95673e-05	ABL1; ACVR1B; ACVR1C; ACVR2B; AKT2; AKT3; AR; ARAF; AXL; CAMK2B; CAMK2D; CAMK2G; CAMK4; CAMKK1; CDK14; CDK17; CDK6; CLK2; DAPK2; DMPK; DSTYK; DUS3L; DYRK1A; DYRK1B; EPHA10; EPHA2; EPHA4; ERBB3; FER; FYN; GRK6; HIPK4; JAK1; LCK; MAP3K1; MAP3K11; MAP3K12; MAP3K14; MAP3K2; MAP3K3; MAP3K6; MAP3K7; MAP4K1; NLK; NR3C1; NRBP1; NTRK1; NTRK3; PAK7; PDGFRA; PDIK1L; PIM1; PIM3; PINK1; PITX2; PKMYT1; PKN1; P…
NKX2-1	18	711	6.74157	1.82427	0.0106818	1	0.0407852	0.0363456	ACVR1B; AKT2; AKT3; CAMK2G; CAMK4; CDK14; CDK17; DDR1; DYRK2; ERBB4; JAK1; MAP3K3; NTRK2; PAK7; PITX2; RPS6KA2; SGK3; STK38L;
NRF1	37	2037	13.8577	1.30851	0.0539098	1	0.127203	0.113356	ABL1; AKT2; ARAF; BMP2K; CAMK2B; CAMKK1; CDC7; CDK10; CDK11A; DUS3L; DYRK1B; GSG2; GTF2F1; MAP2K7; MAP3K11; MAP3K14; MAP3K2; MAP4K1; MAPK7; MAPT; NEK8; NTRK2; PHKG2; PIM2; PIM3; PINK1; PKMYT1; PTK2; RIPK2; SLK; STK32C; STK38; TBK1; TESK1; TNNI3K; VAV3; ZNF334;
BACH1	21	648	7.86517	2.33505	0.000297321	0.0624373	0.00260155	0.00231837	ACVR1; AKT3; BMX; CAMK2B; CAMK2G; CAMK4; CLK2; CSF1R; DDR1; DYRK1A; EGFR; ELK3; ERBB3; IGF1R; LRRK2; MAST2; MATK; PIM1; PRKCB; STK36; TBK1;
HOXB4	12	718	4.49438	1.20466	0.296593	1	0.432532	0.385449	ARAF; CLK2; DAPK1; DYRK1A; MAP3K7; MAP3K8; PITX2; PRKAA2; PRKCE; SGK2; STK33; VAV3;
MEIS2	13	527	4.86891	1.77791	0.0332088	1	0.0894083	0.0796759	CAMKK2; CDK2; DYRK1A; ERBB4; ICK; JAK1; MAP3K1; MAST2; MYLK2; NR3C1; PRKCE; RPS6KA5; STK3;
NR4A2	18	1042	6.74157	1.24478	0.200748	1	0.331946	0.295812	AKT2; ALK; CAMK2G; CDK6; CSNK2A1; DYRK2; EPHA4; ERN1; GSK3A; MAP3K12; NRBP1; PDPK1; PIM3; PITX2; PRKAA2; RAF1; RPS6KA2; SIK1;
PPARA	11	370	4.11985	2.14302	0.0147271	1	0.0524184	0.0467125	CAMK2G; CDK18; MAP3K15; MAP3K6; MUSK; PIM2; PRKCG; RPS6KA6; STK11; TAOK3; ZBTB40;
PPARG	48	2016	17.9775	1.71511	0.000137095	0.0287899	0.00153989	0.00137227	ADRBK1; AKT3; AR; AXL; CAMK2A; CAMK2B; CAMK2G; CDC7; CDK18; CDKL4; CSNK2A1; DDR1; EPHA4; ERBB2; FRK; GRK7; GSK3A; LIMK2; LMX1B; MAP2K7; MAP3K15; MAP3K2; MAP3K6; MAP3K8; MAP4K1; MAP4K2; MAPK13; MAST2; MERTK; MUSK; NLK; PAK6; PIM2; PINK1; PITX2; PRKCB; PRKCE; PRKCZ; RAF1; RPS6KA1; RPS6KA2; STK11; STK32B; TAOK3; TIE1; TNNI3K; ZAP70; ZBTB40;
HSF1	14	806	5.24345	1.25184	0.231679	1	0.36851	0.328397	BTK; CAMK2G; CAMKK1; CDK18; EPHA4; FYN; LRRK2; MAP3K7; PDPK1; PRKCB; PTK2B; RAF1; STK33; STK36;
ETV7	26	1049	9.73783	1.78572	0.00310813	0.652706	0.0167361	0.0149143	BMP2K; BTK; CAMK1G; CAMK2B; CDK17; CHUK; DAPK1; EGFR; FRK; IKBKB; LCK; LIMK1; MAP3K11; MAP3K7; MAP4K2; MAPK13; MAPK3; MUSK; PRKACA; PTK2B; RPS6KA1; RPS6KA3; SGK3; STK38L; TBK1; TIE1;
NR5A2	13	486	4.86891	1.9279	0.0187347	1	0.0605276	0.053939	ACVR1; AMHR2; CHUK; LIMK2; MAP3K12; MAST2; MYLK4; NLK; NTRK2; PRKAA2; PRKACA; RPS6KA5; STK32A;
TEAD1	9	422	3.37079	1.53764	0.134746	1	0.248217	0.221198	ACVR1; CAMK1G; CDK6; CSF1R; DAPK1; DDR1; EPHA2; MUSK; MYLK3;
TFAP2A	4	258	1.49813	1.11933	0.48269	1	0.629596	0.561062	ELK3; PIM3; PITX2; VAV3;
ARNT	8	403	2.99625	1.43143	0.199284	1	0.331946	0.295812	ACVR2B; CAMK2B; CDK4; CLK2; MAP4K1; PIM1; PKN1; TBK1;
BARX1	5	382	1.87266	0.944528	0.614755	1	0.738394	0.658017	MAP2K6; PITX2; PRKCA; PRKD1; STK33;
BSX	6	268	2.24719	1.61501	0.170325	1	0.298069	0.265623	FYN; MAP3K11; MAP3K5; PITX2; PRKCA; TBK1;
DMBX1	13	368	4.86891	2.54607	0.00199831	0.419644	0.0110433	0.00984118	ACVR1C; FGFR3; FRK; MYO3B; NLK; PRKAA2; PRKCB; PRKCE; PRKD1; ROR2; RPS6KA3; RYK; TNNI3K;
GSC	7	379	2.62172	1.33205	0.275125	1	0.409761	0.365157	CAMK2A; FGFR1; FRK; FYN; MYO3B; PRKD1; TNNI3K;
HNF4A	66	3015	24.7191	1.57679	7.82843e-05	0.0164397	0.00102748	0.000915636	ABL1; ACVR1; ACVR1C; AKT2; AKT3; AR; BTK; CAMK2G; CDK15; CDK18; CDK4; CDK6; CLK2; DCLK2; DDR2; DYRK1B; DYRK2; ELK3; EPHA4; ERBB2; ERBB3; ERBB4; FGFR3; FYN; GRK6; GSK3A; JAK1; LIMK2; LRRK2; MAP2K5; MAP2K6; MAP2K7; MAP3K1; MAP3K11; MAP3K15; MAP3K6; MAP4K2; MAST2; MATK; MYLK4; PIM1; PIM2; PINK1; PITX2; PKN2; PRKCA; PRKCB; PRKCE; PRKD2; PRKG2; PTK2B; RAF1; RPS6KA1; RPS6KA3; RPS6KA6; SGK3; SRC; STK11;…
HOXA3	12	573	4.49438	1.5095	0.103975	1	0.20795	0.185314	CAMK4; CDK14; CDK6; ERBB4; GRK6; NTRK1; PDGFRA; PITX2; PRKAA2; PRKCA; TNNI3K; VAV3;
HOXB3	9	335	3.37079	1.93695	0.044971	1	0.111105	0.0990107	BMX; CAMK4; CDC7; CDK15; CDK4; FYN; LRRK2; PRKD1; TARDBP;
HOXD8	20	811	7.49064	1.77694	0.00959674	1	0.0380248	0.0338857	CAMK2D; CDK15; CDK6; CLK2; DAPK1; DYRK1A; EPHA4; ERN1; FYN; JAK1; KSR2; MAP3K2; MAP3K7; MAP3K8; MYLK2; PIM1; SLK; STK11; STK3; STK33;
ONECUT1	15	564	5.61798	1.91666	0.0126499	1	0.0474371	0.0422734	AKT3; BMPR1A; CAMK2D; CAMK4; CDK15; DYRK1A; DYRK4; JAK1; MAP2K5; PITX2; PRKCE; PRKD1; RIPK1; SIK1; SLK;
PAX7	9	467	3.37079	1.38947	0.20303	1	0.333097	0.296838	ACVR1; CDC7; CDK14; CDK4; DAPK1; FYN; MAP3K8; NEK9; STK32C;
POU4F3	13	687	4.86891	1.36385	0.161513	1	0.289895	0.258339	AKT3; CLK2; DDR2; DYRK1A; EPHA4; FYN; LIMK2; MAP3K7; MAST2; MYLK2; STK32C; STK33; VAV3;
PRRX2	12	597	4.49438	1.44882	0.128955	1	0.242308	0.215932	ACVR1; BMX; CDK14; CDK4; EGFR; MAP3K7; MAST2; NTRK2; PITX2; RAF1; RPS6KA2; TNNI3K;
VAX2	5	434	1.87266	0.831362	0.723335	1	0.843891	0.752031	CAMK4; CDC7; DYRK1A; MAST2; STK33;
VSX2	5	595	1.87266	0.606409	0.919161	1	1	0.891147	CDK19; CLK2; PITX2; PRKCA; PRKD1;
CUX1	6	350	2.24719	1.23665	0.358988	1	0.51284	0.457015	AKT3; CDK15; DYRK2; INSRR; NTRK1; PSKH2;
CACD	13	514	4.86891	1.82288	0.0279505	1	0.0815222	0.0726482	BMP2K; CDC25C; DDR1; LIMK2; LMX1B; MAP3K1; MAP3K3; MAPT; NTRK3; PAK6; PRKACA; PRKCG; TTK;
HOXB13	9	526	3.37079	1.23362	0.309197	1	0.447803	0.399058	ACVR1; AKT3; CDK15; FYN; MAP2K5; NLK; NR3C1; PRKCE; TNNI3K;
ZNF238	20	799	7.49064	1.80363	0.00822817	1	0.0359538	0.0320401	ACVR1; AKT1; CAMK2A; CAMK2G; DAPK1; ELK3; KSR2; MAP2K5; MAP3K12; MYO3B; NR3C1; PITX2; PRKCE; RPS6KA1; RPS6KA3; SGK2; SGK3; TGFBR2; TNNI3K; VAV3;
ZNF513	20	799	7.49064	1.80363	0.00822817	1	0.0359538	0.0320401	ACVR1; AKT1; CAMK2A; CAMK2G; DAPK1; ELK3; KSR2; MAP2K5; MAP3K12; MYO3B; NR3C1; PITX2; PRKCE; RPS6KA1; RPS6KA3; SGK2; SGK3; TGFBR2; TNNI3K; VAV3;
MYC	20	1086	7.49064	1.32698	0.121131	1	0.233371	0.207968	ACVR1; ACVR2B; AKT3; CAMK2B; CAMK4; CAMKK2; CDK20; CDK4; CLK2; ELK3; IGF1R; IRAK3; MAP4K1; PIM1; PIM3; PKN1; STK16; TBK1; TESK2; ZBTB40;
MYF5	51	1856	19.1011	1.97937	1.59114e-06	0.00033414	6.6828e-05	5.95535e-05	ACVR1; ACVR1C; ACVR2B; AKT2; ARAF; BMX; CAMK2A; CAMK2B; CDK18; DAPK1; DCLK2; DDR1; DMPK; DYRK1B; DYRK2; EIF2AK1; EPHA2; EPHA4; ERBB3; ERBB4; FES; FGFR1; GRK6; IGF1R; KIT; LCK; LIMK1; MAP2K5; MAP2K6; MAP3K12; MAP3K14; MAP3K6; MAP3K9; MAPK13; MAST2; MUSK; NTRK2; PAK6; PITX2; PKN1; PRKCB; PRKCE; PRKCZ; RAF1; RIPK3; RPS6KA1; RPS6KA3; RPS6KA6; SGK3; STK3; ZAP70;
FOXD1	4	334	1.49813	0.864643	0.684504	1	0.803049	0.715635	CDK19; DYRK2; SGK3; ULK1;
POU6F1	10	655	3.74532	1.10062	0.425284	1	0.576192	0.513471	AKT3; CAMK2D; CAMK2G; CDK2; EPHA4; FYN; MAP3K7; MAPK4; PITX2; STK32C;
ASCL2	38	1499	14.2322	1.82619	0.000221789	0.0465756	0.00211707	0.00188662	ACVR1; AKT2; ALK; AMHR2; CAMK2B; CDK2; CDK6; CHEK1; CLK3; DDR1; DDR2; DMPK; DYRK1B; EGFR; ERBB4; FES; FGFR1; FRK; FYN; GRK6; IGF1R; JAK1; LIMK2; MAP4K2; MAST2; NTRK1; PAK6; PAK7; PKN2; PRKACA; PRKCE; PRKCG; PRKCH; RAF1; RPS6KA3; RYK; TIE1; TNK1;
BARHL1	10	509	3.74532	1.41631	0.172267	1	0.298976	0.266432	CDK14; FYN; GRK6; MAP2K5; MYO3B; NLK; PITX2; PRKD1; RPS6KA2; STK32C;
ESRRA	23	917	8.61423	1.80715	0.00462592	0.971443	0.0225411	0.0200874	ACVR1; CDK14; DCLK2; DYRK1A; EPHA10; EPHA4; FYN; GSK3A; IGF1R; KSR2; MAP3K1; MAP3K15; MAPK14; MAST2; MATK; NRBP1; PDPK1; PIM1; PRKAA2; PRKCQ; RPS6KA2; TESK1; TNNI3K;
GBX1	3	199	1.1236	1.08929	0.523917	1	0.654897	0.583609	CAMK2D; CDK6; PRKD1;
GBX2	11	302	4.11985	2.62554	0.00344735	0.723943	0.0178291	0.0158884	CAMK2D; CAMK4; CDC7; CDK19; CDK6; GRK6; MUSK; MYO3B; PRKD1; TESK2; TNNI3K;
LHX4	9	392	3.37079	1.65531	0.097187	1	0.198148	0.176579	CDK14; ERBB4; FYN; MYO3B; NTRK2; PRKD1; STK32C; TARDBP; TNNI3K;
POU3F4	9	366	3.37079	1.7729	0.0702539	1	0.152096	0.13554	CDK14; DYRK1A; EPHA4; MAST2; NTRK2; PITX2; PRKD1; SLK; STK33;
TCF12	23	1099	8.61423	1.50788	0.0329167	1	0.0894083	0.0796759	ACVR1; AKT2; ALK; BMP2K; CDC7; CDK18; CLK3; CSNK2A1; EGFR; ERBB4; FGFR1; INSRR; KSR2; MAP4K2; MUSK; PAK6; PRKACA; PRKCA; PRKCB; PSKH2; RAF1; RPS6KA1; TIE1;
ELF2	20	780	7.49064	1.84756	0.00638892	1	0.0291668	0.0259919	BTK; CAMK2B; DDR1; EPHA2; FYN; ICK; IKBKB; LCK; LIMK1; LIMK2; MAP2K6; MAP3K1; MAP4K1; MAP4K2; MAPK13; NTRK1; NTRK3; PTK2B; RPS6KA1; WNK4;
ESR1	18	696	6.74157	1.86359	0.00870737	1	0.0360679	0.0321418	AKT2; BMPR1A; CAMK2G; CDK18; DAPK2; EPHA4; GRK7; GSK3A; MAP2K5; MAP2K7; MAST2; NLK; PSKH1; RPS6KA1; SGK2; TAOK3; ULK2; VAV3;
FOS	46	1754	17.2285	1.88917	1.89757e-05	0.0039849	0.000332075	0.000295927	ACVR1; AKT3; BMP2K; BMX; BTK; CAMK2B; CAMK2G; CAMK4; CAMKK1; CDK14; CDK15; CLK2; CSF1R; DDR1; DDR2; DMPK; DYRK1A; EGFR; ELK3; FGFR1; IGF1R; IRAK1; JAK1; LIMK1; MAP3K14; MAP3K8; MAPK13; MAPK3; MAST2; PAK6; PAK7; PDGFRB; PDPK1; PIM1; PIM2; PRKCB; PRKCG; RPS6KA1; RPS6KA4; RPS6KC1; SRC; STK33; STK36; TBK1; TNK1; TNNI3K;
FOSB	46	1754	17.2285	1.88917	1.89757e-05	0.0039849	0.000332075	0.000295927	ACVR1; AKT3; BMP2K; BMX; BTK; CAMK2B; CAMK2G; CAMK4; CAMKK1; CDK14; CDK15; CLK2; CSF1R; DDR1; DDR2; DMPK; DYRK1A; EGFR; ELK3; FGFR1; IGF1R; IRAK1; JAK1; LIMK1; MAP3K14; MAP3K8; MAPK13; MAPK3; MAST2; PAK6; PAK7; PDGFRB; PDPK1; PIM1; PIM2; PRKCB; PRKCG; RPS6KA1; RPS6KA4; RPS6KC1; SRC; STK33; STK36; TBK1; TNK1; TNNI3K;
JUN	46	1754	17.2285	1.88917	1.89757e-05	0.0039849	0.000332075	0.000295927	ACVR1; AKT3; BMP2K; BMX; BTK; CAMK2B; CAMK2G; CAMK4; CAMKK1; CDK14; CDK15; CLK2; CSF1R; DDR1; DDR2; DMPK; DYRK1A; EGFR; ELK3; FGFR1; IGF1R; IRAK1; JAK1; LIMK1; MAP3K14; MAP3K8; MAPK13; MAPK3; MAST2; PAK6; PAK7; PDGFRB; PDPK1; PIM1; PIM2; PRKCB; PRKCG; RPS6KA1; RPS6KA4; RPS6KC1; SRC; STK33; STK36; TBK1; TNK1; TNNI3K;
JUNB	46	1754	17.2285	1.88917	1.89757e-05	0.0039849	0.000332075	0.000295927	ACVR1; AKT3; BMP2K; BMX; BTK; CAMK2B; CAMK2G; CAMK4; CAMKK1; CDK14; CDK15; CLK2; CSF1R; DDR1; DDR2; DMPK; DYRK1A; EGFR; ELK3; FGFR1; IGF1R; IRAK1; JAK1; LIMK1; MAP3K14; MAP3K8; MAPK13; MAPK3; MAST2; PAK6; PAK7; PDGFRB; PDPK1; PIM1; PIM2; PRKCB; PRKCG; RPS6KA1; RPS6KA4; RPS6KC1; SRC; STK33; STK36; TBK1; TNK1; TNNI3K;
JUND	46	1754	17.2285	1.88917	1.89757e-05	0.0039849	0.000332075	0.000295927	ACVR1; AKT3; BMP2K; BMX; BTK; CAMK2B; CAMK2G; CAMK4; CAMKK1; CDK14; CDK15; CLK2; CSF1R; DDR1; DDR2; DMPK; DYRK1A; EGFR; ELK3; FGFR1; IGF1R; IRAK1; JAK1; LIMK1; MAP3K14; MAP3K8; MAPK13; MAPK3; MAST2; PAK6; PAK7; PDGFRB; PDPK1; PIM1; PIM2; PRKCB; PRKCG; RPS6KA1; RPS6KA4; RPS6KC1; SRC; STK33; STK36; TBK1; TNK1; TNNI3K;
NR6A1	18	769	6.74157	1.68668	0.0218856	1	0.0696359	0.0620558	ABL1; AKT2; CDK14; CDK6; DDR2; ERBB4; ITK; LRRK2; MAP2K7; MAP3K15; MUSK; MYO3B; PRKCQ; PRKD1; RPS6KA1; RPS6KA5; SGK2; TNNI3K;
RAB40B	23	806	8.61423	2.05602	0.000905264	0.190105	0.00576077	0.00513369	ACVR1; BTK; CAMK2G; CDC7; CDK14; CDK4; CSNK2A1; DYRK1A; DYRK2; ERBB2; ERN1; GSK3A; MAP3K12; MAP3K6; NOC4L; PIM1; PIM2; PRKCZ; RPS6KA1; RPS6KA2; STK32B; STK33; TTK;
RARA	23	806	8.61423	2.05602	0.000905264	0.190105	0.00576077	0.00513369	ACVR1; BTK; CAMK2G; CDC7; CDK14; CDK4; CSNK2A1; DYRK1A; DYRK2; ERBB2; ERN1; GSK3A; MAP3K12; MAP3K6; NOC4L; PIM1; PIM2; PRKCZ; RPS6KA1; RPS6KA2; STK32B; STK33; TTK;
SPI1	21	814	7.86517	1.85887	0.00490377	1	0.0228843	0.0203932	BTK; CAMK4; DSTYK; DYRK2; EPHA4; FRK; IRAK1; JAK1; MAP4K1; MAP4K2; MAST2; NR3C1; PDIK1L; PKN1; PRKACA; PTK2; RPS6KA1; RPS6KA4; SGK3; TGFBR2; YES1;
DBX2	6	408	2.24719	1.06085	0.501081	1	0.63774	0.56832	AKT3; DYRK1A; MAP2K5; MAP3K7; MAST2; STK33;
EN1	7	466	2.62172	1.08336	0.470185	1	0.620998	0.553401	DAPK1; DYRK1A; MAP3K8; NRBP1; PRKD1; SRC; STK33;
FOXC1	8	301	2.99625	1.91648	0.0597039	1	0.136281	0.121446	ACVR1B; CDK14; CDK19; CDK6; ELK3; EPHA4; MUSK; PKN2;
HOXA5	21	916	7.86517	1.65188	0.017118	1	0.0579802	0.0516688	ACVR1; AKT3; CAMK2A; CAMK4; CDK4; CDK6; DYRK1A; ERBB4; FGFR1; FYN; MAP2K5; MAP3K5; MAP3K7; MYLK4; NRBP1; NTRK1; NTRK2; PRKCA; RPS6KA6; STK38L; TARDBP;
HOXA7	6	527	2.24719	0.821311	0.743563	1	0.857957	0.764565	CLK2; FYN; NRBP1; NTRK1; PRKAA2; STK33;
HOXB6	2	123	0.749064	1.17681	0.5114	1	0.643077	0.573076	PDGFRA; PITX2;
HOXB7	4	388	1.49813	0.744309	0.790061	1	0.892004	0.794907	CAMK4; CDK17; DYRK1A; PTK2;
HOXB8	7	225	2.62172	2.24372	0.03807	1	0.0963216	0.0858366	CDK14; CDK4; EPHA4; MAP3K7; PITX2; TYRO3; VSX2;
HOXC6	6	237	2.24719	1.82625	0.113287	1	0.222338	0.198136	CDK4; CDK6; CLK2; FGFR1; MAP3K5; PITX2;
ISX	10	265	3.74532	2.72034	0.00406156	0.852928	0.0203078	0.0180972	BTK; CDC7; CDK14; CDK19; FYN; GRK6; MERTK; MYO3B; PRKD1; TESK2;
LHX8	7	223	2.62172	2.26384	0.0365562	1	0.0936195	0.0834287	CAMK2D; CDK19; GRK6; PRKD1; TARDBP; TESK2; TNNI3K;
MNX1	8	311	2.99625	1.85486	0.0693654	1	0.152096	0.13554	CAMK4; CDC7; MAST2; NRBP1; PDGFRA; PTK2; STK33; TNNI3K;
MSX1	5	234	1.87266	1.5419	0.226359	1	0.362865	0.323366	CDK14; CLK2; DYRK1A; PITX2; STK33;
NKX1-1	3	146	1.1236	1.48469	0.33073	1	0.475708	0.423925	CAMK4; DAPK1; NRBP1;
PAX6	6	557	2.24719	0.777076	0.7891	1	0.892004	0.794907	AKT3; CDK14; DYRK1A; EPHA10; MAP3K1; TNNI3K;
PBX1	14	741	5.24345	1.36165	0.151699	1	0.274628	0.244733	BMP2K; CAMK2D; CDK15; CDK19; DMPK; DYRK1A; EPHA4; MAP2K5; MAPK4; NLK; PITX2; RPS6KA5; RPS6KC1; STK33;
POU5F1	8	373	2.99625	1.54655	0.149274	1	0.272587	0.242915	CDK14; EGFR; EPHA4; ERBB4; MAP3K8; NTRK2; PITX2; STK32A;
PRRX1	9	389	3.37079	1.66808	0.0938099	1	0.193138	0.172114	ABL1; CDC7; CDK4; DAPK1; MAP3K8; PRKCE; SGK2; STK32C; VAV3;
REST	11	765	4.11985	1.03651	0.496315	1	0.635525	0.566346	DAPK3; DDR1; DYRK1A; ELK3; EPHA10; ERBB3; PRKCB; RPS6KA3; SGK2; TAOK3; ZAP70;
SOX1	6	276	2.24719	1.5682	0.186706	1	0.318767	0.284068	ACVR1; CDK17; EPHA4; ERBB4; MAP2K5; RAF1;
TGIF1	19	1034	7.1161	1.32407	0.130385	1	0.242308	0.215932	CAMKK2; CDC7; CDK14; CDK15; DYRK1A; EPHA10; GRK7; MAP3K5; MAST2; MYLK2; MYO3B; NLK; NR3C1; PAK7; PDGFRA; PIM1; PRKACA; PRKCE; ZBTB40;
CRX	10	349	3.74532	2.06561	0.0244735	1	0.0751768	0.0669936	AMHR2; CAMK1G; CDK17; ELK3; EPHA2; FYN; MYO3B; PITX2; PRKD1; ROR2;
ESR2	9	464	3.37079	1.39846	0.19808	1	0.331946	0.295812	BMPR1A; CAMK2G; CDK18; EPHA4; FES; KSR2; MAP2K7; NLK; PSKH1;
GLI1	2	148	0.749064	0.978041	0.611661	1	0.738394	0.658017	ERBB2; PIM1;
HENMT1	30	1144	11.236	1.88924	0.000619572	0.13011	0.004337	0.0038649	AKT2; ALK; AMHR2; CAMK2A; CAMK2B; CDK18; CDK2; CLK3; CSF1R; DDR1; EGFR; ERBB3; FGFR1; FYN; KSR2; MAP3K3; MAPK14; MINK1; NRBP1; PAK6; PAK7; PITX2; PKN1; PRKACA; PRKCB; PRKCH; PRKCZ; RYK; TIE1; VSX2;
INSM1	8	487	2.99625	1.18453	0.365094	1	0.514563	0.458551	DDR1; EGFR; EPHA10; ERBB3; HIPK4; LMX1B; TAOK3; TIE1;
NHLH1	30	1144	11.236	1.88924	0.000619572	0.13011	0.004337	0.0038649	AKT2; ALK; AMHR2; CAMK2A; CAMK2B; CDK18; CDK2; CLK3; CSF1R; DDR1; EGFR; ERBB3; FGFR1; FYN; KSR2; MAP3K3; MAPK14; MINK1; NRBP1; PAK6; PAK7; PITX2; PKN1; PRKACA; PRKCB; PRKCH; PRKCZ; RYK; TIE1; VSX2;
ZEB1	12	401	4.49438	2.15695	0.0105896	1	0.0407852	0.0363456	CAMK2B; CDK14; IGF1R; LCK; MAPK13; MAPK14; MAPK4; PKN2; PRKG2; TESK2; TGFBR2; VSX2;
ZFP161	30	1137	11.236	1.90088	0.00056079	0.117766	0.00429751	0.00382971	BMPR1A; CAMK2D; CHEK1; CLK2; ELK3; EPHA2; ERBB2; FLT3; IGF1R; INSRR; JAK1; MAP3K3; MAP4K1; MAPK7; MAPT; NR3C1; NTRK1; NTRK2; PDGFRB; PDIK1L; PIM2; PITX2; PRKCA; PRKCE; PTK2; RAF1; RPS6KA5; SLK; STK32B; STK32C;
BACH2	15	628	5.61798	1.72134	0.0297301	1	0.0843692	0.0751853	ACVR1; AKT3; CAMK2B; CAMK2G; CAMK4; CSF1R; DDR1; DYRK1A; ERBB3; LIMK1; MAP3K8; NLK; PIM1; PRKCB; RPS6KA1;
EBF1	7	205	2.62172	2.46261	0.024701	1	0.0751768	0.0669936	CAMK2B; DSTYK; LIMK1; LIMK2; MAP4K2; PRKCZ; SGK2;
HOXA13	4	309	1.49813	0.934596	0.624609	1	0.745273	0.664147	CDK14; MAP3K7; MAP3K8; PRKCQ;
MSX2	8	344	2.99625	1.67692	0.107684	1	0.213336	0.190114	BTK; CDC7; CDK6; ERBB3; MYO3B; SGK3; TESK2; TNNI3K;
NOBOX	9	621	3.37079	1.04491	0.495613	1	0.635525	0.566346	CDC7; CDK14; CDK19; ERBB3; MYO3B; PITX2; PRKCE; ROR2; TESK2;
TFAP4	31	1280	11.6105	1.74478	0.00180657	0.37938	0.0105383	0.00939119	ACVR1; ADRBK1; AKT2; ALK; ARAF; CAMK2A; CDC7; CDK4; CDK6; DYRK1B; EPHA10; EPHA4; ERBB3; ERBB4; FRK; IGF1R; LIMK2; MAP2K5; MAP3K5; MAST2; NR3C1; NTRK1; PAK6; PDGFRB; PRKCB; PRKCE; PRKCG; RPS6KA1; TTK; TYRO3; ZAP70;
ATF3	17	800	6.36704	1.5313	0.0547282	1	0.127699	0.113799	ACVR1C; ADRBK1; AKT3; AXL; CAMK2B; CAMK2D; EPHA2; EPHB1; IKBKB; MAP3K2; MAST2; NOC4L; PDGFRB; PITX2; PRKCZ; RPS6KA1; STK38L;
TAL1	29	1113	10.8614	1.87716	0.000846076	0.177676	0.00573148	0.00510759	ALK; CAMK2B; CDK14; CDK4; CDK6; CHUK; DDR1; DMPK; DYRK1B; EPHA2; FES; FYN; GSK3A; JAK1; KIT; KSR2; LIMK1; MAP2K6; MAP3K12; MAPK14; MYO3B; NPR2; NTRK1; PRKACA; PRKCB; PRKCH; RPS6KA1; STK32B; STK36;
HOXA9	11	729	4.11985	1.08769	0.432555	1	0.582286	0.518902	CDK14; CDK15; CDK6; DYRK1A; ERBB4; MAP2K5; MAP3K7; PAK7; RPS6KA3; RPS6KA6; TNNI3K;
NFE2	14	518	5.24345	1.94783	0.0138498	1	0.0510257	0.0454714	BTK; CDK14; CDK15; DDR1; DYRK1A; IRAK1; MAST2; PAK6; PAK7; PDGFRB; PRKCZ; RPS6KA1; RPS6KC1; TBK1;
LMO2	14	610	5.24345	1.65407	0.0462095	1	0.112837	0.100555	DCLK2; DDR1; EPHA2; EPHA4; ERBB3; ERBB4; MAPT; NTRK3; PITX2; PKN1; PRKD2; SGK3; SLK; TESK2;
RUNX2	11	315	4.11985	2.51718	0.00472289	0.991807	0.0225411	0.0200874	AKT2; BMP2K; CAMK2D; CDK15; EGFR; ELK3; FYN; PIM1; PRKCE; RPS6KA1; YES1;
GATA1	13	728	4.86891	1.28704	0.213891	1	0.348194	0.310292	ACVR1; AMHR2; EPHA2; EPHA4; ERBB3; FYN; MAP3K8; MYO3B; NTRK3; PITX2; PRKCE; PRKD1; WNK4;
FOXD3	4	361	1.49813	0.799976	0.741318	1	0.857957	0.764565	ACVR1C; CAMK2D; ICK; MAP2K5;
ISL2	9	515	3.37079	1.25997	0.288357	1	0.426443	0.380023	CDK14; DYRK1A; MAP2K5; MAP3K8; PITX2; STK32C; STK33; STK36; TNNI3K;
ZNF143	11	618	4.11985	1.28305	0.241828	1	0.373411	0.332764	CDK19; DUS3L; GRK4; GTF2F1; INSRR; MAP2K6; PIM1; PIM2; PKN1; PRKAA2; TARDBP;
CDX2	4	253	1.49813	1.14145	0.467613	1	0.620998	0.553401	FYN; MAP3K7; PRKCE; TNNI3K;
FOXK1	3	121	1.1236	1.79142	0.236639	1	0.36851	0.328397	EPHA4; PITX2; STK33;
FOXO1	5	192	1.87266	1.87917	0.129688	1	0.242308	0.215932	CDK17; CDK6; ICK; PITX2; PKN2;
GFI1	14	552	5.24345	1.82786	0.0225933	1	0.0708147	0.0631063	BMX; CAMK2G; CDK14; EPHA4; FYN; IKBKB; IRAK3; MAP2K5; MAP2K7; MAP3K2; NPR2; PRKD1; SGK2; STK36;
HMX1	2	240	0.749064	0.603141	0.848951	1	0.943279	0.8406	CDK14; FYN;
HOXB9	6	537	2.24719	0.806017	0.75947	1	0.871523	0.776655	CDK14; CDK15; ERBB4; LIMK1; MAP3K5; TNNI3K;
PAX4	4	175	1.49813	1.65019	0.226114	1	0.362865	0.323366	EPHA4; ERBB4; FYN; PITX2;
PDX1	6	372	2.24719	1.16351	0.413431	1	0.567455	0.505685	ACVR1; DYRK1A; FYN; MAST2; MUSK; MYLK2;
EOMES	8	291	2.99625	1.98233	0.0509401	1	0.122959	0.109574	AKT3; CLK2; DAPK1; MOS; PRKD1; RAF1; STK32A; UHMK1;
POU3F3	2	59	0.749064	2.45314	0.197547	1	0.331946	0.295812	ICK; MAP2K5;
T	1	46	0.374532	1.58096	0.474773	1	0.623139	0.555308	EGFR;
TBX5	6	204	2.24719	2.12166	0.0655905	1	0.148108	0.131986	CSNK2A1; DDR1; EGFR; MAPK3; RPS6KA3; STK32A;
ATF6	3	195	1.1236	1.11163	0.510288	1	0.643077	0.573076	LMX1B; PITX2; TYRO3;
STRA13	13	574	4.86891	1.63234	0.0581615	1	0.134219	0.119609	CAMK2D; CAMK2G; CDK20; CDK4; DYRK1A; DYRK1B; EIF2AK2; IRAK1; MAP4K1; PKN1; PKN2; PRKCE; ZBTB40;
ZIC1	19	548	7.1161	2.49831	0.000250857	0.0526801	0.00229044	0.00204112	ABL1; CAMK1G; CAMK2A; CDC25C; CDK6; CLK2; EPHA2; ERBB2; ERBB3; FES; GTF2F1; MUSK; NOC4L; PDGFRA; PIM1; PRKCE; SRC; STK33; TESK1;
DBX1	2	239	0.749064	0.605664	0.847297	1	0.943279	0.8406	ERBB4; JAK1;
FOXJ2	6	299	2.24719	1.44757	0.2369	1	0.36851	0.328397	ERBB2; MAP2K5; MAP3K7; NTRK2; PITX2; TNNI3K;
ELF1	22	585	8.2397	2.70962	2.44741e-05	0.00513956	0.000395351	0.000352315	ACVR1; CAMK2B; CAMK2G; CAMK4; DSTYK; EPHA2; FGFR1; FRK; IKBKB; JAK1; LCK; MAP2K5; MAP3K8; MAP4K1; MAST2; MATK; PDIK1L; PKN1; RPS6KA1; RPS6KA4; SGK3; TIE1;
E4F1	3	158	1.1236	1.37194	0.376173	1	0.523154	0.466207	AURKB; MAP3K7; PITX2;
ITGAL	4	178	1.49813	1.62238	0.235005	1	0.36851	0.328397	EPHA4; ERBB2; LMX1B; VSX2;
ESX1	6	266	2.24719	1.62715	0.166328	1	0.29352	0.261569	CDK14; CDK4; DYRK1A; PRKD1; STK32C; STK33;
TLX2	1	60	0.374532	1.21213	0.56838	1	0.69801	0.62203	PITX2;
DLX5	7	220	2.62172	2.29471	0.034361	1	0.0904998	0.0806486	CAMK4; CDK6; DYRK1A; DYRK2; NTRK1; PDGFRA; PRKCA;
ATF4	8	315	2.99625	1.8313	0.0734838	1	0.154316	0.137518	AKT3; BMPR1A; GTF2F1; NOC4L; PITX2; PSKH1; RPS6KA3; STK38L;
ELF3	17	437	6.36704	2.80327	0.000139323	0.0292579	0.00153989	0.00137227	ACVR1; BLK; BMX; BTK; CDK19; FRK; JAK1; MAP2K6; MAP3K11; MAP3K3; MAP4K2; NR3C1; PITX2; RAF1; RPS6KA3; TGFBR1; YES1;
HOXA10	1	20	0.374532	3.63518	0.244047	1	0.374087	0.333366	EPHA4;
SPDEF	3	189	1.1236	1.14692	0.489471	1	0.634499	0.565432	ACVR2B; WNK4; ZNF610;
PAX5	2	149	0.749064	0.971477	0.615328	1	0.738394	0.658017	DAPK1; TP53RK;
NKX3-1	1	61	0.374532	1.19226	0.574392	1	0.701292	0.624954	CDK6;
WT1	3	17	1.1236	12.7442	0.00155816	0.327213	0.0096239	0.00857631	CDK6; LCK; MAP2K6;
RBPJ	2	235	0.749064	0.615973	0.840518	1	0.943279	0.8406	CDK6; DYRK1A;
CEBPD	2	113	0.749064	1.28095	0.46682	1	0.620998	0.553401	CAMK2A; EGFR;
PATZ1	1	38	0.374532	1.91371	0.412469	1	0.567455	0.505685	HIPK4;
MAFK	3	128	1.1236	1.69346	0.262652	1	0.399687	0.35618	MAP3K7; MUSK; YES1;
ELF5	1	22	0.374532	3.30486	0.264916	1	0.400232	0.356665	AKT3;
ALX1	1	56	0.374532	1.2987	0.543476	1	0.675325	0.601813	TNNI3K;
PLAGL1	1	7	0.374532	10.3766	0.0932498	1	0.193138	0.172114	TYRO3;
SMAD1	1	13	0.374532	5.59108	0.16625	1	0.29352	0.261569	AKT3;
CEBPB	1	2	0.374532	36.1891	0.027577	1	0.0815222	0.0726482	MAP2K6;

## Sheet: Clinical phenotype
Analysis: Clinical phenotype
Dataset name: Client proteins of Hsp90-Cdc37
Number of genes in the dataset: 267
Number of genes in the dataset (which are available in Clinical phenotype database) :44
Number of genes in background: 19230
Is analysis quantitative: No
						Corrected p-values
Clinical phenotype	No. of genes in the dataset	No.of genes in the background dataset	Percentage of genes	Fold enrichment	P-value (Hypergeometric test)	Bonferroni method	BH method	Q-value (Storey-Tibshirani method)
Abdomen	17	621	6.36704	1.97268	0.00624291	1	0.439062	1	AKT1; AKT2; AMHR2; AR; BRAF; BTK; DMPK; FGFR1; KIT; MAPT; PDGFRA; PITX2; RET; ROR2; RPS6KA3; STK11; ZAP70;
Abdominal distention	1	7	0.374532	10.3766	0.0932498	1	1	1	RET;
Abdominal, inguinal, or labial testes	1	1	0.374532	72.0198	0.0138846	1	0.439062	1	AR;
Abnormal EEG in 25% hospitalized patients	1	14	0.374532	5.19201	0.177834	1	1	1	AKT1;
Abnormal iris pigmentation	1	1	0.374532	72.0198	0.0138846	1	0.439062	1	LMX1B;
Abnormal lipid profile	1	1	0.374532	72.0198	0.0138846	1	0.439062	1	AR;
Abnormally shaped triangular or absent lunulae	1	1	0.374532	72.0198	0.0138846	1	0.439062	1	LMX1B;
Abnormal respiration due to defect in autonomic function	1	6	0.374532	12.1032	0.0804787	1	1	1	RET;
Abnormal umbilicus	1	2	0.374532	36.1891	0.027577	1	0.707971	1	ROR2;
Absence of eyebrows	1	1	0.374532	72.0198	0.0138846	1	0.439062	1	BRAF;
Absence of eyelashes	1	1	0.374532	72.0198	0.0138846	1	0.439062	1	BRAF;
Absence of myotonia in infancy (congenital form)	1	1	0.374532	72.0198	0.0138846	1	0.439062	1	DMPK;
Absent antibody production	1	1	0.374532	72.0198	0.0138846	1	0.439062	1	BTK;
Absent axonal flare response to intradermal histamine injection	1	1	0.374532	72.0198	0.0138846	1	0.439062	1	NTRK1;
Absent B lymphocytes in all organs	1	1	0.374532	72.0198	0.0138846	1	0.439062	1	BTK;
Absent B-lymphocytes in all organs	1	1	0.374532	72.0198	0.0138846	1	0.439062	1	BTK;
Absent CD8+ T cells	1	1	0.374532	72.0198	0.0138846	1	0.439062	1	ZAP70;
Absent corneal sensation	1	1	0.374532	72.0198	0.0138846	1	0.439062	1	NTRK1;
Absent enteric ganglia beginning at the rectum and extends proximally by varying degrees	1	1	0.374532	72.0198	0.0138846	1	0.439062	1	RET;
Absent facial hair	1	1	0.374532	72.0198	0.0138846	1	0.439062	1	AR;
Absent or severely reduced levels of serum immunoglobulins	1	1	0.374532	72.0198	0.0138846	1	0.439062	1	BTK;
Absent parotid gland	1	3	0.374532	24.1661	0.0410801	1	0.916281	1	FGFR3;
Absent plasma cells in all organs	1	1	0.374532	72.0198	0.0138846	1	0.439062	1	BTK;
Absent ribs	1	4	0.374532	18.1397	0.0543964	1	1	1	ROR2;
Absent Stensen duct	1	3	0.374532	24.1661	0.0410801	1	0.916281	1	FGFR3;
Absent stereopsis due to anomalous decussation at the optic chiasm	1	3	0.374532	24.1661	0.0410801	1	0.916281	1	OCA2;
Absent uvula	1	1	0.374532	72.0198	0.0138846	1	0.439062	1	ROR2;
Absent vas deferens	1	1	0.374532	72.0198	0.0138846	1	0.439062	1	AR;
Abundant CD4+ T cells	1	1	0.374532	72.0198	0.0138846	1	0.439062	1	ZAP70;
Acanthosis	1	5	0.374532	14.519	0.0675284	1	1	1	AKT1;
Accidental injury and ulceration of the lips and tongue due to decreased sensation	1	1	0.374532	72.0198	0.0138846	1	0.439062	1	NTRK1;
Accidental injury to the self (mouth, digits) has been referred to by some as 'self-mutilation'	1	1	0.374532	72.0198	0.0138846	1	0.439062	1	NTRK1;
Acetylcholinesterase staining reveals nerve trunk hypertrophy	1	1	0.374532	72.0198	0.0138846	1	0.439062	1	RET;
Acral ulceration and osteomyelitis leading to autoamputation of the digits	1	1	0.374532	72.0198	0.0138846	1	0.439062	1	NTRK1;
Acromesomelia	1	2	0.374532	36.1891	0.027577	1	0.707971	1	NPR2;
Adrenal medullary tumor	1	8	0.374532	9.08115	0.105844	1	1	1	RET;
Adult Onset - 100-1,000 repeats	1	1	0.374532	72.0198	0.0138846	1	0.439062	1	DMPK;
Adult onset	1	10	0.374532	7.26673	0.130513	1	1	1	CSF1R;
Affected, Mild - 50-150 repeats	1	1	0.374532	72.0198	0.0138846	1	0.439062	1	DMPK;
Aggregation of SNCA-immunopositive inclusions	1	4	0.374532	18.1397	0.0543964	1	1	1	MAPT;
Agitation	1	7	0.374532	10.3766	0.0932498	1	1	1	IGF1R;
Airways	4	66	1.49813	4.37509	0.0133645	1	0.439062	1	DDR2; FGFR1; FGFR3; STK11;
Akinesia	2	4	0.749064	36.0997	0.00113135	1	0.438724	1	ERBB3; MAPT;
Alacrima (dry eye syndrome)	1	3	0.374532	24.1661	0.0410801	1	0.916281	1	FGFR3;
Allelic disorder to androgen insensitivity syndrome (AIS,	1	1	0.374532	72.0198	0.0138846	1	0.439062	1	AR;
Allelic disorder to brachydactyly type B (	1	1	0.374532	72.0198	0.0138846	1	0.439062	1	ROR2;
Allelic to Robinow syndrome, autosomal recessive (	1	1	0.374532	72.0198	0.0138846	1	0.439062	1	ROR2;
Alopecia	1	22	0.374532	3.30486	0.264916	1	1	1	ACVR1;
Alveolar cell carcinoma	4	16	1.49813	18.0387	5.79855e-05	1	0.0534046	0.347699	BRAF; EGFR; ERBB2; MAP3K8;
Alveolar hypoventilation	1	6	0.374532	12.1032	0.0804787	1	1	1	RET;
Amniotic Fluid	6	68	2.24719	6.36434	0.000360626	1	0.194422	1	BRAF; DMPK; ERBB3; FGFR3; FLT4; RET;
Amyotrophic lateral sclerosis	1	4	0.374532	18.1397	0.0543964	1	1	1	MAPT;
Anal stenosis	1	11	0.374532	6.60672	0.142591	1	1	1	PITX2;
Anemia	1	43	0.374532	1.69123	0.45222	1	1	1	BMPR1A;
Anhidrosis	1	7	0.374532	10.3766	0.0932498	1	1	1	NTRK1;
Anhidrosis of the trunk and limbs 100% of the time	1	1	0.374532	72.0198	0.0138846	1	0.439062	1	NTRK1;
Anhydramnios	1	4	0.374532	18.1397	0.0543964	1	1	1	RET;
Aniridia	1	5	0.374532	14.519	0.0675284	1	1	1	PITX2;
Annular limbal dermoids extending onto cornea and conjunctiva	1	1	0.374532	72.0198	0.0138846	1	0.439062	1	PITX2;
Anonychia	1	2	0.374532	36.1891	0.027577	1	0.707971	1	LMX1B;
Anosmia	1	9	0.374532	8.07325	0.118264	1	1	1	FGFR1;
Anterior beaking (childhood)	1	1	0.374532	72.0198	0.0138846	1	0.439062	1	NPR2;
Anterior horn atrophy	1	1	0.374532	72.0198	0.0138846	1	0.439062	1	ERBB3;
Anterior rib cupping	1	1	0.374532	72.0198	0.0138846	1	0.439062	1	DDR2;
Anteverted nares	2	36	0.749064	4.01999	0.0889378	1	1	1	FGFR1; RPS6KA3;
Anteverted nares (96%)	1	2	0.374532	36.1891	0.027577	1	0.707971	1	ROR2;
Antimullerian hormone (AMH) defect	1	2	0.374532	36.1891	0.027577	1	0.707971	1	AMHR2;
Anxiety	1	18	0.374532	4.03887	0.222588	1	1	1	PINK1;
Anxious affect	1	1	0.374532	72.0198	0.0138846	1	0.439062	1	IGF1R;
Apathy	1	11	0.374532	6.60672	0.142591	1	1	1	MAPT;
Apical hypertrophy (in some patients)	1	3	0.374532	24.1661	0.0410801	1	0.916281	1	MYLK2;
Aplastic/hypoplastic lacrimal glands	1	3	0.374532	24.1661	0.0410801	1	0.916281	1	FGFR3;
Aplastic/hypoplastic lacrimal puncta	1	3	0.374532	24.1661	0.0410801	1	0.916281	1	FGFR3;
Approximately 70-80% of cases are de novo and sporadic	1	1	0.374532	72.0198	0.0138846	1	0.439062	1	RPS6KA3;
Apraxia	1	10	0.374532	7.26673	0.130513	1	1	1	CSF1R;
Arched eyebrows	1	7	0.374532	10.3766	0.0932498	1	1	1	RPS6KA3;
Argyrophilic hyperphosphorylated tau-positive inclusions (Pick bodies)	1	2	0.374532	36.1891	0.027577	1	0.707971	1	MAPT;
Arnold-Chiari malformation	1	5	0.374532	14.519	0.0675284	1	1	1	FGFR1;
Arrhythmia	1	5	0.374532	14.519	0.0675284	1	1	1	MYLK2;
Arthrogryposis	1	5	0.374532	14.519	0.0675284	1	1	1	ERBB3;
Asperger-like features	1	3	0.374532	24.1661	0.0410801	1	0.916281	1	AKT3;
Associated with advanced paternal age	1	4	0.374532	18.1397	0.0543964	1	1	1	BRAF;
Associated with the tau (	1	1	0.374532	72.0198	0.0138846	1	0.439062	1	MAPT;
Astrocytes	1	1	0.374532	72.0198	0.0138846	1	0.439062	1	CSF1R;
Astrocytomas	1	3	0.374532	24.1661	0.0410801	1	0.916281	1	ERBB2;
Astrogliosis	1	3	0.374532	24.1661	0.0410801	1	0.916281	1	MAPT;
A subset of patients have heterozygous mutations, which may predispose to disease development	1	1	0.374532	72.0198	0.0138846	1	0.439062	1	PINK1;
Asymmetric septal hypertrophy	1	7	0.374532	10.3766	0.0932498	1	1	1	MYLK2;
Asymmetric visual evoked potentials	1	3	0.374532	24.1661	0.0410801	1	0.916281	1	OCA2;
Asymmetry at onset (74%)	1	1	0.374532	72.0198	0.0138846	1	0.439062	1	PINK1;
Atlantoaxial instability	1	3	0.374532	24.1661	0.0410801	1	0.916281	1	DDR2;
Atrial arrhythmias	1	2	0.374532	36.1891	0.027577	1	0.707971	1	DMPK;
Atrial septal defect	1	47	0.374532	1.54733	0.482083	1	1	1	AKT3;
Atrial septal defects	1	4	0.374532	18.1397	0.0543964	1	1	1	BRAF;
Atrophy and weakness of limb musculature	1	1	0.374532	72.0198	0.0138846	1	0.439062	1	AR;
Atrophy and weakness of the tongue, jaw, and throat muscles	1	1	0.374532	72.0198	0.0138846	1	0.439062	1	AR;
Atrophy may be more severe in the left hemisphere	1	2	0.374532	36.1891	0.027577	1	0.707971	1	MAPT;
Attention deficits	1	1	0.374532	72.0198	0.0138846	1	0.439062	1	PRKCG;
Autonomic dysfunction	1	7	0.374532	10.3766	0.0932498	1	1	1	NTRK1;
Autonomic instability (22%)	1	1	0.374532	72.0198	0.0138846	1	0.439062	1	PINK1;
Autosomal dominant (11p)	1	5	0.374532	14.519	0.0675284	1	1	1	FGFR3;
Autosomal dominant (12p13)	1	1	0.374532	72.0198	0.0138846	1	0.439062	1	PDGFRB;
Autosomal dominant (4q11-q12)	1	2	0.374532	36.1891	0.027577	1	0.707971	1	KIT;
Autosomal dominant	30	747	11.236	2.89329	1.90823e-07	0.00421796	0.00344184	0.0224086	ACVR1; AKT1; AKT2; AKT3; BMPR1A; BRAF; CSF1R; DMPK; EPHA2; ERBB2; FGFR1; FGFR3; FLT3; FLT4; IGF1R; KIT; LMX1B; LRRK2; MAPT; MYLK2; NTRK1; PDGFRA; PDGFRB; PITX2; PRKCG; RET; ROR2; STK11; TGFBR1; TGFBR2;
Autosomal dominant form	1	37	0.374532	1.96542	0.40418	1	1	1	AR;
Autosomal dominantly acting oncogene plus loss of suppressor gene(s)	2	25	0.749064	5.78808	0.0467235	1	1	1	AKT1; FGFR3;
Autosomal dominant transmission has been rarely reported	1	1	0.374532	72.0198	0.0138846	1	0.439062	1	BRAF;
Autosomal dominant type	1	3	0.374532	24.1661	0.0410801	1	0.916281	1	FLT4;
Autosomal dominant with complete penetrance	1	1	0.374532	72.0198	0.0138846	1	0.439062	1	FGFR3;
Autosomal dominant with incomplete penetrance	1	1	0.374532	72.0198	0.0138846	1	0.439062	1	MAPT;
Autosomal recessive	15	924	5.61798	1.16992	0.303731	1	1	1	AURKC; BRAF; DDR2; EGFR; ERBB2; ERBB3; IGF1R; MAP3K8; NPR2; NTRK1; OCA2; PINK1; RET; ROR2; ZAP70;
Autosomal recessive at BEY locus	1	2	0.374532	36.1891	0.027577	1	0.707971	1	OCA2;
Autosomal recessive vs. dominant with low penetrance and expression	1	1	0.374532	72.0198	0.0138846	1	0.439062	1	MAPT;
Autosomal recessive with male sex limitation	1	2	0.374532	36.1891	0.027577	1	0.707971	1	AMHR2;
Average age at onset 66 years although earlier onset may occur	1	1	0.374532	72.0198	0.0138846	1	0.439062	1	MAPT;
Avoidant personality traits	1	1	0.374532	72.0198	0.0138846	1	0.439062	1	DMPK;
Axial dystonia	1	2	0.374532	36.1891	0.027577	1	0.707971	1	MAPT;
Axial hypotonia	1	20	0.374532	3.63518	0.244047	1	1	1	AKT3;
Axonal spheroids	1	1	0.374532	72.0198	0.0138846	1	0.439062	1	CSF1R;
Azoospermia/oligospermia (present at diagnosis)	3	3	1.1236	72.0198	2.64709e-06	0.0585113	0.00344184	0.0224086	FGFR3; KIT; STK11;
Ballooned neurons	1	2	0.374532	36.1891	0.027577	1	0.707971	1	CSF1R;
Barium enema shows transition zone between aganglionic contracted segment and dilated proximal bowel	1	2	0.374532	36.1891	0.027577	1	0.707971	1	RET;
Behavioral changes	1	5	0.374532	14.519	0.0675284	1	1	1	CSF1R;
Behavioral Psychiatric Manifestations	7	200	2.62172	2.52417	0.0219475	1	0.684241	1	CSF1R; DMPK; IGF1R; MAPT; NTRK1; PINK1; PRKCG;
Bell-shaped chest	1	2	0.374532	36.1891	0.027577	1	0.707971	1	DDR2;
Benign soft tissue developmental anomalies	1	1	0.374532	72.0198	0.0138846	1	0.439062	1	PDGFRB;
Biceps aplasia	1	1	0.374532	72.0198	0.0138846	1	0.439062	1	LMX1B;
Bifid scrotum	1	10	0.374532	7.26673	0.130513	1	1	1	AR;
Bifid terminal phalanges	1	2	0.374532	36.1891	0.027577	1	0.707971	1	ROR2;
Bifid thumb	1	5	0.374532	14.519	0.0675284	1	1	1	FGFR3;
Bifid tongue (59%)	1	1	0.374532	72.0198	0.0138846	1	0.439062	1	ROR2;
Bilateral cryptorchidism	1	2	0.374532	36.1891	0.027577	1	0.707971	1	AMHR2;
Bilateral facial weakness (congenital form)	1	1	0.374532	72.0198	0.0138846	1	0.439062	1	DMPK;
Biliary Tract	2	30	0.749064	4.82372	0.0647794	1	1	1	DMPK; STK11;
Biliary tract polyps	1	1	0.374532	72.0198	0.0138846	1	0.439062	1	STK11;
Birth rate of 7.6 per 1,000,000	1	1	0.374532	72.0198	0.0138846	1	0.439062	1	FGFR3;
Bitemporal narrowing	1	8	0.374532	9.08115	0.105844	1	1	1	BRAF;
Bladder	5	90	1.87266	4.00866	0.00838153	1	0.439062	1	ERBB3; MAPT; PINK1; RET; STK11;
Bladder abnormalities	1	3	0.374532	24.1661	0.0410801	1	0.916281	1	RET;
BLADDER CANCER	1	5	0.374532	14.519	0.0675284	1	1	1	FGFR3;
Bladder hypoplasia	1	3	0.374532	24.1661	0.0410801	1	0.916281	1	RET;
Bladder polyps	1	1	0.374532	72.0198	0.0138846	1	0.439062	1	STK11;
Blindness	1	41	0.374532	1.77371	0.436652	1	1	1	AKT3;
Blind vagina	1	1	0.374532	72.0198	0.0138846	1	0.439062	1	AR;
Blue color recessive to brown	1	2	0.374532	36.1891	0.027577	1	0.707971	1	OCA2;
Blurred vision	1	3	0.374532	24.1661	0.0410801	1	0.916281	1	MAPT;
Both germline (familial) and somatic (sporadic) mutation in KIT (	2	4	0.749064	36.0997	0.00113135	1	0.438724	1	KIT; PDGFRA;
Bowed forearms	1	1	0.374532	72.0198	0.0138846	1	0.439062	1	NPR2;
Bowed radius	1	1	0.374532	72.0198	0.0138846	1	0.439062	1	NPR2;
Bowing of legs	1	1	0.374532	72.0198	0.0138846	1	0.439062	1	FGFR3;
Bowleg	1	1	0.374532	72.0198	0.0138846	1	0.439062	1	FGFR3;
Brachycephaly	1	37	0.374532	1.96542	0.40418	1	1	1	FGFR3;
Brachydactyly	1	64	0.374532	1.13639	0.59193	1	1	1	FGFR3;
Brachydactyly (91%)	1	1	0.374532	72.0198	0.0138846	1	0.439062	1	ROR2;
Brachymesophalangism V	1	2	0.374532	36.1891	0.027577	1	0.707971	1	ROR2;
Brachymesophalangy of hands and feet	1	2	0.374532	36.1891	0.027577	1	0.707971	1	FGFR1;
Bradykinesia	4	24	1.49813	12.0283	0.000310199	1	0.180438	1	CSF1R; LRRK2; MAPT; PINK1;
Brain imaging shows deep white matter lesions, particularly affecting the frontal and parietal lobes	1	1	0.374532	72.0198	0.0138846	1	0.439062	1	CSF1R;
Brain malformations	1	1	0.374532	72.0198	0.0138846	1	0.439062	1	AKT1;
Brain stem atrophy	1	1	0.374532	72.0198	0.0138846	1	0.439062	1	BRAF;
Brain stem compression	1	3	0.374532	24.1661	0.0410801	1	0.916281	1	FGFR3;
Brain tissue shows myelin loss	1	1	0.374532	72.0198	0.0138846	1	0.439062	1	CSF1R;
BREAST CANCER	1	23	0.374532	3.16123	0.275134	1	1	1	AKT1;
Breast cancer (ductal)	1	1	0.374532	72.0198	0.0138846	1	0.439062	1	STK11;
Breast carcinoma	1	23	0.374532	3.16123	0.275134	1	1	1	AKT1;
Breasts	3	55	1.1236	3.94073	0.0409225	1	0.916281	1	AKT2; AR; STK11;
Broad femoral neck	1	1	0.374532	72.0198	0.0138846	1	0.439062	1	ACVR1;
Broad forehead	1	19	0.374532	3.82641	0.233393	1	1	1	FGFR3;
Broad great toe	1	2	0.374532	36.1891	0.027577	1	0.707971	1	FGFR1;
Broad halluces	1	7	0.374532	10.3766	0.0932498	1	1	1	FGFR3;
Broad middle and proximal phalanges	1	1	0.374532	72.0198	0.0138846	1	0.439062	1	NPR2;
Broad nares	1	2	0.374532	36.1891	0.027577	1	0.707971	1	DDR2;
Broad nasal bridge	2	34	0.749064	4.25639	0.0806164	1	1	1	IGF1R; PITX2;
Broad nasal bridge (95%)	1	1	0.374532	72.0198	0.0138846	1	0.439062	1	ROR2;
Broad nose	1	9	0.374532	8.07325	0.118264	1	1	1	RPS6KA3;
Broad, thimble-like middle phalanges	1	1	0.374532	72.0198	0.0138846	1	0.439062	1	FGFR3;
Broad thumb	1	3	0.374532	24.1661	0.0410801	1	0.916281	1	FGFR1;
Broad thumbs (30%)	1	1	0.374532	72.0198	0.0138846	1	0.439062	1	ROR2;
Broad thumbs	1	7	0.374532	10.3766	0.0932498	1	1	1	ROR2;
Broad toes (24%)	1	1	0.374532	72.0198	0.0138846	1	0.439062	1	ROR2;
Bronchial polyps	1	1	0.374532	72.0198	0.0138846	1	0.439062	1	STK11;
Bronchi calcifications	1	1	0.374532	72.0198	0.0138846	1	0.439062	1	DDR2;
Bulbar weakness	1	6	0.374532	12.1032	0.0804787	1	1	1	AR;
Bulbous nasal tip	1	9	0.374532	8.07325	0.118264	1	1	1	BRAF;
Bulging of temporal fossae	1	1	0.374532	72.0198	0.0138846	1	0.439062	1	FGFR3;
C1-C2 subluxation	1	2	0.374532	36.1891	0.027577	1	0.707971	1	DDR2;
Calcaneocuboidal fusions	1	1	0.374532	72.0198	0.0138846	1	0.439062	1	FGFR3;
Calcification of falx cerebri	1	2	0.374532	36.1891	0.027577	1	0.707971	1	DDR2;
Calcified body and greater cornua of hyoid	1	1	0.374532	72.0198	0.0138846	1	0.439062	1	DDR2;
Calcified coracoacromial ligament	1	1	0.374532	72.0198	0.0138846	1	0.439062	1	DDR2;
Calcified coracoclavicular ligament	1	1	0.374532	72.0198	0.0138846	1	0.439062	1	DDR2;
Calcified cricoid cartilage	1	1	0.374532	72.0198	0.0138846	1	0.439062	1	DDR2;
Calcified patellae	1	1	0.374532	72.0198	0.0138846	1	0.439062	1	DDR2;
Calcified styloid process	1	1	0.374532	72.0198	0.0138846	1	0.439062	1	DDR2;
Calcified stylomandibular ligaments	1	1	0.374532	72.0198	0.0138846	1	0.439062	1	DDR2;
Calcified thyroid cartilage	1	1	0.374532	72.0198	0.0138846	1	0.439062	1	DDR2;
Calf hypertrophy (uncommon)	1	1	0.374532	72.0198	0.0138846	1	0.439062	1	AR;
Camptodactyly	1	36	0.374532	2.01999	0.395775	1	1	1	ROR2;
Candidiasis	1	1	0.374532	72.0198	0.0138846	1	0.439062	1	ZAP70;
Capillary hemangiomas	1	4	0.374532	18.1397	0.0543964	1	1	1	FLT4;
Capillary malformations	1	1	0.374532	72.0198	0.0138846	1	0.439062	1	AKT1;
Capitate-hamate fusions	1	1	0.374532	72.0198	0.0138846	1	0.439062	1	FGFR3;
Cardiac	2	55	0.749064	2.63152	0.177479	1	1	1	FGFR1; RET;
Cardiovascular	10	446	3.74532	1.61637	0.0938443	1	1	1	AKT1; AKT3; BRAF; DMPK; ERBB3; FLT4; MYLK2; NTRK1; ROR2; RPS6KA3;
Carpal calcifications	1	1	0.374532	72.0198	0.0138846	1	0.439062	1	DDR2;
Cartilaginous trachea	1	2	0.374532	36.1891	0.027577	1	0.707971	1	FGFR1;
Cataract	2	36	0.749064	4.01999	0.0889378	1	1	1	DMPK; LMX1B;
Catatonic behavior	1	14	0.374532	5.19201	0.177834	1	1	1	AKT1;
Cavernous hemangioma	1	2	0.374532	36.1891	0.027577	1	0.707971	1	BRAF;
Cavum septi pellucidi	1	3	0.374532	24.1661	0.0410801	1	0.916281	1	AKT3;
Cavum vergae	1	3	0.374532	24.1661	0.0410801	1	0.916281	1	AKT3;
C-cell hyperplasia	1	1	0.374532	72.0198	0.0138846	1	0.439062	1	RET;
Central Nervous System	24	887	8.98876	1.94947	0.00144708	1	0.439062	1	ACVR1; AKT1; AKT2; AKT3; AR; BRAF; BTK; CSF1R; DDR2; DMPK; ERBB3; FGFR1; FGFR3; IGF1R; LMX1B; LRRK2; MAPT; NPR2; NTRK1; PINK1; PRKCG; RET; ROR2; RPS6KA3;
Cerebellar atrophy	1	56	0.374532	1.2987	0.543476	1	1	1	PRKCG;
Cerebral atrophy	1	48	0.374532	1.5151	0.489291	1	1	1	DMPK;
Cerebral hemorrhage	1	10	0.374532	7.26673	0.130513	1	1	1	RET;
Cerebriform connective tissue nevus	1	1	0.374532	72.0198	0.0138846	1	0.439062	1	AKT1;
Chest	13	243	4.86891	3.85572	3.73603e-05	0.825812	0.0412906	0.268829	AKT2; AR; BRAF; DDR2; FGFR1; FGFR3; IGF1R; LMX1B; NPR2; RET; ROR2; RPS6KA3; STK11;
Childhood onset has been reported	1	2	0.374532	36.1891	0.027577	1	0.707971	1	AR;
Choanal atresia	1	17	0.374532	4.27631	0.211633	1	1	1	FGFR1;
Choanal atresia or stenosis	1	2	0.374532	36.1891	0.027577	1	0.707971	1	FGFR1;
Choking	1	1	0.374532	72.0198	0.0138846	1	0.439062	1	AR;
Cholelithiasis	1	6	0.374532	12.1032	0.0804787	1	1	1	DMPK;
Chordee	1	5	0.374532	14.519	0.0675284	1	1	1	FGFR1;
Choroidal vessels visible	1	3	0.374532	24.1661	0.0410801	1	0.916281	1	OCA2;
Chronic eczematoid rash	1	1	0.374532	72.0198	0.0138846	1	0.439062	1	ZAP70;
Chronic hypercapnia	1	6	0.374532	12.1032	0.0804787	1	1	1	RET;
Chronic hypoxemia	1	6	0.374532	12.1032	0.0804787	1	1	1	RET;
Chronic otitis media	1	6	0.374532	12.1032	0.0804787	1	1	1	BTK;
Cleft lip	1	43	0.374532	1.69123	0.45222	1	1	1	LMX1B;
Cleft palate	1	97	0.374532	0.74982	0.743252	1	1	1	LMX1B;
Clinical features in females include mild mental retardation (80%), short stature (50%), prominent forehead, and coarse facies	1	1	0.374532	72.0198	0.0138846	1	0.439062	1	RPS6KA3;
Clinodactyly, 3,5 finger	1	3	0.374532	24.1661	0.0410801	1	0.916281	1	FGFR3;
Clinodactyly	3	39	1.1236	5.55703	0.0167394	1	0.526327	1	BRAF; FGFR3; IGF1R;
Clinodactyly (88%)	1	1	0.374532	72.0198	0.0138846	1	0.439062	1	ROR2;
Clover leaf head	1	1	0.374532	72.0198	0.0138846	1	0.439062	1	FGFR3;
Clover-leaf skull (in some patients)	1	2	0.374532	36.1891	0.027577	1	0.707971	1	FGFR1;
Cloverleaf skull rarely	1	1	0.374532	72.0198	0.0138846	1	0.439062	1	FGFR3;
Clubbing of fingers	1	1	0.374532	72.0198	0.0138846	1	0.439062	1	STK11;
Club feet	1	15	0.374532	4.8461	0.189257	1	1	1	RET;
Coarse-appearing facies	1	1	0.374532	72.0198	0.0138846	1	0.439062	1	RET;
Coarse facial features	1	15	0.374532	4.8461	0.189257	1	1	1	BRAF;
Coarse facies	1	28	0.374532	2.59693	0.32414	1	1	1	RPS6KA3;
Cognitive decline	2	10	0.749064	14.4615	0.0080302	1	0.439062	1	CSF1R; PRKCG;
Cognitive decline (rare)	1	1	0.374532	72.0198	0.0138846	1	0.439062	1	LRRK2;
Colon cancer (cancer not arising in polyps)	1	2	0.374532	36.1891	0.027577	1	0.707971	1	BMPR1A;
Colonic diverticulosis	1	1	0.374532	72.0198	0.0138846	1	0.439062	1	RET;
Conductive hearing loss	2	22	0.749064	6.577	0.0369626	1	0.916281	1	ACVR1; FGFR3;
Coned epiphyses	1	1	0.374532	72.0198	0.0138846	1	0.439062	1	FGFR3;
Cone-shaped epiphyses	1	8	0.374532	9.08115	0.105844	1	1	1	NPR2;
Congenital heart defect	1	21	0.374532	3.46216	0.254554	1	1	1	FGFR1;
Congenital - over 2,000 repeats	1	1	0.374532	72.0198	0.0138846	1	0.439062	1	DMPK;
Congenital spinal stenosis due to short pedicles, especially lumbar	1	1	0.374532	72.0198	0.0138846	1	0.439062	1	FGFR3;
Congestive heart failure	1	25	0.374532	2.90844	0.295147	1	1	1	MYLK2;
Conjunctivitis	1	17	0.374532	4.27631	0.211633	1	1	1	BTK;
Constipation	3	41	1.1236	5.28602	0.0191352	1	0.599099	1	BRAF; MAPT; RET;
Constipation (reported in 1 family with a PDFGRA mutation)	2	4	0.749064	36.0997	0.00113135	1	0.438724	1	KIT; PDGFRA;
Convex facial profile	1	1	0.374532	72.0198	0.0138846	1	0.439062	1	BRAF;
Corneal opacities	1	15	0.374532	4.8461	0.189257	1	1	1	NTRK1;
Corneal perforation	1	3	0.374532	24.1661	0.0410801	1	0.916281	1	FGFR3;
Corneal scarring	1	4	0.374532	18.1397	0.0543964	1	1	1	NTRK1;
Corneal sensitivity impairment (hypesthesia)	1	3	0.374532	24.1661	0.0410801	1	0.916281	1	FGFR3;
Corneal ulceration	1	4	0.374532	18.1397	0.0543964	1	1	1	NTRK1;
Coronal craniosynostosis (unicoronal or bicoronal, unilateral or bilateral)	1	1	0.374532	72.0198	0.0138846	1	0.439062	1	FGFR3;
Coronal hypospadias	1	3	0.374532	24.1661	0.0410801	1	0.916281	1	FGFR3;
Cortical and subcortical neuronal loss in the frontal and temporal regions	1	2	0.374532	36.1891	0.027577	1	0.707971	1	MAPT;
Cortical atrophy	1	14	0.374532	5.19201	0.177834	1	1	1	BRAF;
Coxa valga	1	22	0.374532	3.30486	0.264916	1	1	1	RPS6KA3;
Craniosynostosis	1	7	0.374532	10.3766	0.0932498	1	1	1	FGFR1;
Craniosynostosis (coronal with or without sagittal suture)	1	2	0.374532	36.1891	0.027577	1	0.707971	1	FGFR1;
Craniosynostosis (metopic suture)	1	1	0.374532	72.0198	0.0138846	1	0.439062	1	FGFR1;
Crowded teeth (94%)	1	1	0.374532	72.0198	0.0138846	1	0.439062	1	ROR2;
Cryptorchidism	1	101	0.374532	0.720127	0.757287	1	1	1	FGFR1;
Cryptorchidism (67%)	1	1	0.374532	72.0198	0.0138846	1	0.439062	1	ROR2;
Cushing syndrome	1	3	0.374532	24.1661	0.0410801	1	0.916281	1	RET;
Cutaneous lichen amyloidosis	1	1	0.374532	72.0198	0.0138846	1	0.439062	1	RET;
Cutaneous syndactyly (less common)	1	1	0.374532	72.0198	0.0138846	1	0.439062	1	ROR2;
Cutaneous syndactyly of second and third toes	1	2	0.374532	36.1891	0.027577	1	0.707971	1	FGFR1;
Cutis marmorata	1	5	0.374532	14.519	0.0675284	1	1	1	RPS6KA3;
Cystic changes in the kidney	1	1	0.374532	72.0198	0.0138846	1	0.439062	1	ERBB3;
Dacryocystitis	1	4	0.374532	18.1397	0.0543964	1	1	1	FGFR3;
Death in majority of infants soon after birth	1	1	0.374532	72.0198	0.0138846	1	0.439062	1	FGFR3;
Death in utero or in the perinatal period	1	3	0.374532	24.1661	0.0410801	1	0.916281	1	RET;
Death within 6 years after onset	1	1	0.374532	72.0198	0.0138846	1	0.439062	1	CSF1R;
Decreased basal body temperature	1	6	0.374532	12.1032	0.0804787	1	1	1	RET;
Decreased fertility	1	1	0.374532	72.0198	0.0138846	1	0.439062	1	AR;
Decreased fetal activity	1	6	0.374532	12.1032	0.0804787	1	1	1	FGFR3;
Decreased fetal movement	1	10	0.374532	7.26673	0.130513	1	1	1	ERBB3;
Decreased iris pigment	1	2	0.374532	36.1891	0.027577	1	0.707971	1	OCA2;
Decreased or increased serum testosterone	1	1	0.374532	72.0198	0.0138846	1	0.439062	1	AR;
Decreased retinal pigmentation	1	3	0.374532	24.1661	0.0410801	1	0.916281	1	OCA2;
Decreased sense of smell	1	4	0.374532	18.1397	0.0543964	1	1	1	MAPT;
Decreased sensitivity to hypercapnia and hypoxemia	1	6	0.374532	12.1032	0.0804787	1	1	1	RET;
Decreased sensory nerve action potentials	1	3	0.374532	24.1661	0.0410801	1	0.916281	1	AR;
Decreased small myelinated nerve fibers	1	1	0.374532	72.0198	0.0138846	1	0.439062	1	NTRK1;
Decreased vibration sense at ankles	1	1	0.374532	72.0198	0.0138846	1	0.439062	1	PRKCG;
Decreased visual acuity	1	21	0.374532	3.46216	0.254554	1	1	1	OCA2;
Decrease in abstract thinking	1	2	0.374532	36.1891	0.027577	1	0.707971	1	MAPT;
Deep vein thrombosis	1	5	0.374532	14.519	0.0675284	1	1	1	AKT1;
Defective (Ca2+) mobilization in T cells	1	1	0.374532	72.0198	0.0138846	1	0.439062	1	ZAP70;
Deficient growth hormone response to insulin, arginine, or levodopa	1	1	0.374532	72.0198	0.0138846	1	0.439062	1	BTK;
Degenerative vitreoretinopathy	1	1	0.374532	72.0198	0.0138846	1	0.439062	1	ERBB3;
Delayed bone age	4	31	1.49813	9.31311	0.000851099	1	0.422514	1	BRAF; IGF1R; ROR2; RPS6KA3;
Delayed closure of anterior fontanel	1	4	0.374532	18.1397	0.0543964	1	1	1	RPS6KA3;
Delayed eruption of primary teeth	1	3	0.374532	24.1661	0.0410801	1	0.916281	1	FGFR3;
Delayed eruption of secondary teeth	1	2	0.374532	36.1891	0.027577	1	0.707971	1	ROR2;
Delayed fontanel closure	1	1	0.374532	72.0198	0.0138846	1	0.439062	1	ROR2;
Delayed motor development	2	55	0.749064	2.63152	0.177479	1	1	1	FGFR3; IGF1R;
Delayed onset of puberty	1	1	0.374532	72.0198	0.0138846	1	0.439062	1	BTK;
Delayed speech acquisition	1	2	0.374532	36.1891	0.027577	1	0.707971	1	BTK;
Delayed wound healing with normal immune system	1	1	0.374532	72.0198	0.0138846	1	0.439062	1	NTRK1;
Delivery	1	43	0.374532	1.69123	0.45222	1	1	1	BRAF;
Delusions	1	28	0.374532	2.59693	0.32414	1	1	1	AKT1;
Dementia	1	34	0.374532	2.13878	0.378609	1	1	1	CSF1R;
Dementia (5%)	1	1	0.374532	72.0198	0.0138846	1	0.439062	1	PINK1;
Dementia may occur	1	4	0.374532	18.1397	0.0543964	1	1	1	MAPT;
Dementia (rare)	1	2	0.374532	36.1891	0.027577	1	0.707971	1	LRRK2;
Dental caries, severe	1	4	0.374532	18.1397	0.0543964	1	1	1	FGFR3;
Dental crowding	1	29	0.374532	2.50741	0.333537	1	1	1	FGFR1;
Dependent acrocyanosis	1	1	0.374532	72.0198	0.0138846	1	0.439062	1	RPS6KA3;
Depressed nasal bridge	2	38	0.749064	3.80847	0.0975001	1	1	1	BRAF; FGFR1;
Depressed nasal bridge (49%)	1	1	0.374532	72.0198	0.0138846	1	0.439062	1	ROR2;
Depression	4	37	1.49813	7.80328	0.00167374	1	0.439062	1	CSF1R; MAPT; PINK1; PRKCG;
Dermal hypoplasia	1	1	0.374532	72.0198	0.0138846	1	0.439062	1	AKT1;
Dermal or subcutaneous infiltrate of spindle-shaped cells arranged in a whorled pattern seen on histology	1	1	0.374532	72.0198	0.0138846	1	0.439062	1	PDGFRB;
Developmental delay	6	141	2.24719	3.06956	0.0140084	1	0.442344	1	AKT3; DDR2; FGFR3; NTRK1; RET; ROR2;
Diarrhea	3	56	1.1236	3.87037	0.0428097	1	0.952937	1	BTK; RET; ZAP70;
Diffuse hypotonia	1	7	0.374532	10.3766	0.0932498	1	1	1	AKT3;
Digital clubbing	1	4	0.374532	18.1397	0.0543964	1	1	1	BMPR1A;
Digitalized thumb	1	3	0.374532	24.1661	0.0410801	1	0.916281	1	FGFR3;
Dilated cardiomyopathy (in some patients)	1	3	0.374532	24.1661	0.0410801	1	0.916281	1	ERBB3;
Diminished pupillary light responses	1	6	0.374532	12.1032	0.0804787	1	1	1	RET;
Diplopia	1	8	0.374532	9.08115	0.105844	1	1	1	MAPT;
Disinhibition	1	10	0.374532	7.26673	0.130513	1	1	1	MAPT;
Disorganized speech	1	14	0.374532	5.19201	0.177834	1	1	1	AKT1;
Displaced pupils	1	1	0.374532	72.0198	0.0138846	1	0.439062	1	PITX2;
Disproportionately long fibulae	1	1	0.374532	72.0198	0.0138846	1	0.439062	1	DDR2;
Disproportionately short limbs often noted at birth	1	1	0.374532	72.0198	0.0138846	1	0.439062	1	NPR2;
Disproportionate prominence of the femoral medial condyle	1	1	0.374532	72.0198	0.0138846	1	0.439062	1	LMX1B;
Distal weakness occurs later	1	1	0.374532	72.0198	0.0138846	1	0.439062	1	AR;
Distended urinary bladder	1	1	0.374532	72.0198	0.0138846	1	0.439062	1	ERBB3;
Diurnal fluctuation	1	1	0.374532	72.0198	0.0138846	1	0.439062	1	PINK1;
Dolichocephaly	2	21	0.749064	6.89004	0.0339071	1	0.863459	1	AKT1; BRAF;
Downslanting palpebral fissures	6	57	2.24719	7.59234	0.000135779	1	0.103491	0.673797	AKT1; BRAF; FGFR1; FGFR3; ROR2; RPS6KA3;
Downturned mouth corners (95%)	1	1	0.374532	72.0198	0.0138846	1	0.439062	1	ROR2;
Drumstick' terminal phalanges	1	1	0.374532	72.0198	0.0138846	1	0.439062	1	RPS6KA3;
Dry mouth	1	5	0.374532	14.519	0.0675284	1	1	1	FGFR3;
Duplicated kidneys (rare)	1	3	0.374532	24.1661	0.0410801	1	0.916281	1	AKT3;
Dwarfism, lethal micromelic	1	1	0.374532	72.0198	0.0138846	1	0.439062	1	FGFR3;
Dwarfism, short-limbed	1	1	0.374532	72.0198	0.0138846	1	0.439062	1	DDR2;
Dysarthria	3	118	1.1236	1.83696	0.225634	1	1	1	AR; MAPT; PRKCG;
Dysautonomia may occur	1	4	0.374532	18.1397	0.0543964	1	1	1	MAPT;
Dyscoria	1	1	0.374532	72.0198	0.0138846	1	0.439062	1	PITX2;
Dysfunction of the autonomic nervous system	1	6	0.374532	12.1032	0.0804787	1	1	1	RET;
Dysmetria	1	16	0.374532	4.54341	0.200523	1	1	1	PRKCG;
Dysmotility	1	1	0.374532	72.0198	0.0138846	1	0.439062	1	BRAF;
Dysphagia	6	67	2.24719	6.45932	0.000332626	1	0.188522	1	AR; DMPK; KIT; MAPT; PDGFRA; PRKCG;
Dysplastic ilium	1	1	0.374532	72.0198	0.0138846	1	0.439062	1	FGFR3;
Dystonia	1	71	0.374532	1.02436	0.630105	1	1	1	MAPT;
Dystonia at onset (16%)	1	1	0.374532	72.0198	0.0138846	1	0.439062	1	PINK1;
Dystrophic nails	1	14	0.374532	5.19201	0.177834	1	1	1	NTRK1;
Earlobe creases	1	1	0.374532	72.0198	0.0138846	1	0.439062	1	BRAF;
Early onset (9-48 years, but reported up to 68 years)	1	1	0.374532	72.0198	0.0138846	1	0.439062	1	PINK1;
Early onset prostate cancer	1	12	0.374532	6.05662	0.154503	1	1	1	AR;
Ears	10	442	3.74532	1.631	0.0897555	1	1	1	ACVR1; BRAF; BTK; FGFR1; FGFR3; KIT; LMX1B; RET; ROR2; RPS6KA3;
Ears deficient in cartilage	1	3	0.374532	24.1661	0.0410801	1	0.916281	1	RET;
Echolalia	1	5	0.374532	14.519	0.0675284	1	1	1	MAPT;
EKG abnormalities	1	2	0.374532	36.1891	0.027577	1	0.707971	1	DMPK;
Elbow deformities (60-90%) with limited range of motion	1	1	0.374532	72.0198	0.0138846	1	0.439062	1	LMX1B;
Elbow flexion contracture	1	3	0.374532	24.1661	0.0410801	1	0.916281	1	DDR2;
Electromyography shows myotonic discharges	1	1	0.374532	72.0198	0.0138846	1	0.439062	1	DMPK;
Elevated AFP (endodermal sinus tumor)	3	3	1.1236	72.0198	2.64709e-06	0.0585113	0.00344184	0.0224086	FGFR3; KIT; STK11;
Elevated calcitonin	1	1	0.374532	72.0198	0.0138846	1	0.439062	1	RET;
Elevated hCG (choriocarcinoma)	3	3	1.1236	72.0198	2.64709e-06	0.0585113	0.00344184	0.0224086	FGFR3; KIT; STK11;
Elevated hCG or AFP or both (embryonal carcinoma)	3	3	1.1236	72.0198	2.64709e-06	0.0585113	0.00344184	0.0224086	FGFR3; KIT; STK11;
Elevated plasma estrogen	1	1	0.374532	72.0198	0.0138846	1	0.439062	1	AR;
Elevated plasma follicle stimulating hormone (FSH)	1	1	0.374532	72.0198	0.0138846	1	0.439062	1	AR;
Elevated plasma luteinizing hormone (LH)	1	1	0.374532	72.0198	0.0138846	1	0.439062	1	AR;
Elongated radius with hypoplasia of radial head	1	1	0.374532	72.0198	0.0138846	1	0.439062	1	LMX1B;
Emotional blunting	1	2	0.374532	36.1891	0.027577	1	0.707971	1	MAPT;
Emotional lability in 50% of patients	1	1	0.374532	72.0198	0.0138846	1	0.439062	1	NTRK1;
Enamel hypoplasia	1	27	0.374532	2.69308	0.31461	1	1	1	FGFR3;
Encephalitis	1	3	0.374532	24.1661	0.0410801	1	0.916281	1	BTK;
Endo	1	39	0.374532	1.86465	0.420642	1	1	1	AKT2;
Endocrine	2	44	0.749064	3.28925	0.124443	1	1	1	FGFR1; RET;
Endocrine Features	5	155	1.87266	2.32772	0.0652993	1	1	1	AR; BTK; PITX2; RET; STK11;
Enlarged white matter	1	3	0.374532	24.1661	0.0410801	1	0.916281	1	AKT3;
Enterocolitis	1	2	0.374532	36.1891	0.027577	1	0.707971	1	RET;
Enteroviral dermatomyositis syndrome	1	1	0.374532	72.0198	0.0138846	1	0.439062	1	BTK;
Enteroviral hepatitis	1	1	0.374532	72.0198	0.0138846	1	0.439062	1	BTK;
Ependymomas	1	3	0.374532	24.1661	0.0410801	1	0.916281	1	ERBB2;
Epibulbar dermoids	1	1	0.374532	72.0198	0.0138846	1	0.439062	1	AKT1;
Epicanthal folds	1	61	0.374532	1.19226	0.574392	1	1	1	BRAF;
Epidermal nevi	1	1	0.374532	72.0198	0.0138846	1	0.439062	1	AKT1;
Epididymitis	1	1	0.374532	72.0198	0.0138846	1	0.439062	1	BTK;
Epiphyseal stippling (hips, distal and proximal humeri, proximal and distal femora, distal fibulae, proximal and distal tibiae, distal radii and ulnae)	1	1	0.374532	72.0198	0.0138846	1	0.439062	1	DDR2;
Episodic hypertension	1	8	0.374532	9.08115	0.105844	1	1	1	RET;
ESOPHAGEAL CANCER	1	6	0.374532	12.1032	0.0804787	1	1	1	TGFBR2;
Esophageal cancer	1	8	0.374532	9.08115	0.105844	1	1	1	TGFBR2;
Evidence of anticipation	2	21	0.749064	6.89004	0.0339071	1	0.863459	1	FLT3; KIT;
Exaggerated lumbar lordosis during childhood and adulthood	1	1	0.374532	72.0198	0.0138846	1	0.439062	1	FGFR3;
Excessive daytime sleepiness	1	3	0.374532	24.1661	0.0410801	1	0.916281	1	DMPK;
Executive dysfunction	1	4	0.374532	18.1397	0.0543964	1	1	1	CSF1R;
Exophthalmos	1	9	0.374532	8.07325	0.118264	1	1	1	BRAF;
Extensible joints	1	1	0.374532	72.0198	0.0138846	1	0.439062	1	RPS6KA3;
External Features	10	180	3.74532	4.00488	0.000217201	1	0.13943	0.907779	AKT2; AR; BRAF; DDR2; FGFR1; FGFR3; IGF1R; PITX2; ROR2; RPS6KA3;
External Genitalia (Female)	1	50	0.374532	1.45451	0.50341	1	1	1	ROR2;
External Genitalia (Male)	7	151	2.62172	3.34321	0.00521485	1	0.439062	1	AR; FGFR1; FGFR3; FLT4; PITX2; ROR2; RPS6KA3;
Eyelid and corneal neuromas	1	1	0.374532	72.0198	0.0138846	1	0.439062	1	RET;
Eyelid apraxia	1	1	0.374532	72.0198	0.0138846	1	0.439062	1	MAPT;
Eyelid ptosis	1	3	0.374532	24.1661	0.0410801	1	0.916281	1	AKT3;
Eye movement abnormalities	1	2	0.374532	36.1891	0.027577	1	0.707971	1	PRKCG;
Eyes	20	826	7.49064	1.74467	0.01156	1	0.439062	1	AKT1; AKT3; BRAF; BTK; DDR2; DMPK; EPHA2; ERBB3; FGFR1; FGFR3; KIT; LMX1B; MAPT; NTRK1; OCA2; PITX2; PRKCG; RET; ROR2; RPS6KA3;
Face	17	433	6.36704	2.82917	0.000124825	1	0.103491	0.673797	AKT1; AKT2; AKT3; AR; BRAF; DDR2; ERBB3; FGFR1; FGFR3; IGF1R; MAPT; NPR2; PITX2; PRKCG; RET; ROR2; RPS6KA3;
Facial dysmorphism (in some patients)	1	1	0.374532	72.0198	0.0138846	1	0.439062	1	IGF1R;
Facial myokymia	1	3	0.374532	24.1661	0.0410801	1	0.916281	1	PRKCG;
Failure to pass meconium in first 48 hours of life	1	1	0.374532	72.0198	0.0138846	1	0.439062	1	RET;
Failure to thrive	4	202	1.49813	1.42963	0.308545	1	1	1	BMPR1A; BRAF; FGFR1; ZAP70;
Failure to thrive in infancy	1	4	0.374532	18.1397	0.0543964	1	1	1	RET;
Falls	1	1	0.374532	72.0198	0.0138846	1	0.439062	1	MAPT;
Familial (10%) and isolated cases	1	1	0.374532	72.0198	0.0138846	1	0.439062	1	RET;
Familial acute myelogenous leukemia (AML)	2	21	0.749064	6.89004	0.0339071	1	0.863459	1	FLT3; KIT;
Familial pheochromocytoma usually bilateral	1	8	0.374532	9.08115	0.105844	1	1	1	RET;
Fasciculations	1	15	0.374532	4.8461	0.189257	1	1	1	AR;
Favorable response to levodopa	1	2	0.374532	36.1891	0.027577	1	0.707971	1	LRRK2;
Feet	11	345	4.11985	2.2983	0.00910098	1	0.439062	1	ACVR1; BRAF; DDR2; FGFR1; FGFR3; LMX1B; NPR2; NTRK1; RET; ROR2; RPS6KA3;
Female body fat distribution	1	1	0.374532	72.0198	0.0138846	1	0.439062	1	AR;
Female body habitus	1	1	0.374532	72.0198	0.0138846	1	0.439062	1	AR;
Female external genitalia in males	1	1	0.374532	72.0198	0.0138846	1	0.439062	1	AR;
Females more severely affected than males	1	1	0.374532	72.0198	0.0138846	1	0.439062	1	FGFR3;
Fever, episodic, severe	1	1	0.374532	72.0198	0.0138846	1	0.439062	1	NTRK1;
Fever is often the presenting symptom	1	1	0.374532	72.0198	0.0138846	1	0.439062	1	NTRK1;
FGFR3, G380R (	1	1	0.374532	72.0198	0.0138846	1	0.439062	1	FGFR3;
Fifth finger clinodactyly	2	33	0.749064	4.38533	0.0765525	1	1	1	ACVR1; LMX1B;
Fifty percent of cases are sporadic	1	1	0.374532	72.0198	0.0138846	1	0.439062	1	RET;
Final adult height 38-49 inches	1	1	0.374532	72.0198	0.0138846	1	0.439062	1	NPR2;
Final height, 125 to 160 cm	1	1	0.374532	72.0198	0.0138846	1	0.439062	1	FGFR3;
Flared and irregular metaphyses	1	1	0.374532	72.0198	0.0138846	1	0.439062	1	FGFR3;
Flared iliac wings	1	6	0.374532	12.1032	0.0804787	1	1	1	DDR2;
Flat affect	1	1	0.374532	72.0198	0.0138846	1	0.439062	1	CSF1R;
Flat, broad mandibular condyles	1	1	0.374532	72.0198	0.0138846	1	0.439062	1	ACVR1;
Flat facial profile	1	4	0.374532	18.1397	0.0543964	1	1	1	ROR2;
Flat feet	1	5	0.374532	14.519	0.0675284	1	1	1	RPS6KA3;
Flat midface	1	8	0.374532	9.08115	0.105844	1	1	1	DDR2;
Flat nasal bridge	1	21	0.374532	3.46216	0.254554	1	1	1	DDR2;
Flat rooted acetabulae	1	1	0.374532	72.0198	0.0138846	1	0.439062	1	FGFR3;
Flattened nose	1	4	0.374532	18.1397	0.0543964	1	1	1	RET;
Fleshy lower lip	1	1	0.374532	72.0198	0.0138846	1	0.439062	1	IGF1R;
Flexion contractures at both knees	1	3	0.374532	24.1661	0.0410801	1	0.916281	1	AKT3;
Flushing attacks	1	1	0.374532	72.0198	0.0138846	1	0.439062	1	RET;
Focal dystonia (rare)	1	1	0.374532	72.0198	0.0138846	1	0.439062	1	PRKCG;
Focal pachygyria	1	4	0.374532	18.1397	0.0543964	1	1	1	AKT3;
Foramen magnum stenosis	1	1	0.374532	72.0198	0.0138846	1	0.439062	1	FGFR3;
Forearm fullness	1	1	0.374532	72.0198	0.0138846	1	0.439062	1	RPS6KA3;
Forgetfulness	1	1	0.374532	72.0198	0.0138846	1	0.439062	1	MAPT;
Foveal hypoplasia	1	4	0.374532	18.1397	0.0543964	1	1	1	OCA2;
Fractures	1	8	0.374532	9.08115	0.105844	1	1	1	FGFR1;
Freckles in sun-exposed areas	1	3	0.374532	24.1661	0.0410801	1	0.916281	1	OCA2;
French telephone receiver femurs'	1	1	0.374532	72.0198	0.0138846	1	0.439062	1	FGFR3;
Frequent bacterial infections	1	1	0.374532	72.0198	0.0138846	1	0.439062	1	BTK;
Frequent epitheliomas	1	2	0.374532	36.1891	0.027577	1	0.707971	1	KIT;
Frequent loss of heterozygosity at 6q24-q27	1	6	0.374532	12.1032	0.0804787	1	1	1	AKT1;
Frequent loss of heterozygosity of APC and/or MCC genes	1	6	0.374532	12.1032	0.0804787	1	1	1	TGFBR2;
Frontal balding (male pattern baldness)	1	2	0.374532	36.1891	0.027577	1	0.707971	1	DMPK;
Frontal bossing	4	58	1.49813	4.97844	0.00857156	1	0.439062	1	AKT3; DDR2; FGFR1; FGFR3;
Frontal bossing (78%)	1	1	0.374532	72.0198	0.0138846	1	0.439062	1	ROR2;
Frontal lobe dementia	2	6	0.749064	24.0865	0.00277677	1	0.439062	1	CSF1R; MAPT;
Frontal lobe hypoplasia	1	2	0.374532	36.1891	0.027577	1	0.707971	1	BRAF;
Frontal release signs (45%)	1	1	0.374532	72.0198	0.0138846	1	0.439062	1	MAPT;
Frontolimbic dementia	1	1	0.374532	72.0198	0.0138846	1	0.439062	1	MAPT;
Frontotemporal dementia	1	5	0.374532	14.519	0.0675284	1	1	1	MAPT;
Frontotemporal lobar atrophy with 'knife-edge' distinction	1	2	0.374532	36.1891	0.027577	1	0.707971	1	MAPT;
Fused vertebrae	1	2	0.374532	36.1891	0.027577	1	0.707971	1	ROR2;
Gait ataxia	1	22	0.374532	3.30486	0.264916	1	1	1	PRKCG;
Gait disturbances	1	9	0.374532	8.07325	0.118264	1	1	1	MAPT;
Gait imbalance	1	1	0.374532	72.0198	0.0138846	1	0.439062	1	MAPT;
Gait impairment (55%)	1	1	0.374532	72.0198	0.0138846	1	0.439062	1	PINK1;
Ganglioneuroblastoma	1	8	0.374532	9.08115	0.105844	1	1	1	RET;
Ganglioneuroma	1	8	0.374532	9.08115	0.105844	1	1	1	RET;
Gastroesophageal reflux	1	13	0.374532	5.59108	0.16625	1	1	1	BRAF;
Gastrointestinal	13	425	4.86891	2.2046	0.00669144	1	0.439062	1	AR; BRAF; BTK; DMPK; FGFR1; KIT; MAPT; PDGFRA; PITX2; RET; RPS6KA3; STK11; ZAP70;
Gastrointestinal carcinoma	1	1	0.374532	72.0198	0.0138846	1	0.439062	1	STK11;
Gastrointestinal stromal tumors	2	4	0.749064	36.0997	0.00113135	1	0.438724	1	KIT; PDGFRA;
Generalized joint laxity	1	2	0.374532	36.1891	0.027577	1	0.707971	1	FGFR3;
Generalized, unilateral or localized disproportionate overgrowth of any tissue	1	1	0.374532	72.0198	0.0138846	1	0.439062	1	AKT1;
Genetic anticipation occurs	1	1	0.374532	72.0198	0.0138846	1	0.439062	1	DMPK;
Genetic heterogeneity	1	142	0.374532	0.512218	0.863685	1	1	1	AKT1;
Genetic heterogeneity (see, e.g.,	1	2	0.374532	36.1891	0.027577	1	0.707971	1	MAPT;
Genetic heterogeneity (see PSNP2	1	1	0.374532	72.0198	0.0138846	1	0.439062	1	MAPT;
Genetic heterogeneity (see RIEG2,	1	1	0.374532	72.0198	0.0138846	1	0.439062	1	PITX2;
Genetic heterogeneity, some patients not linked to FGFR3	1	1	0.374532	72.0198	0.0138846	1	0.439062	1	FGFR3;
Genitourinary	18	478	6.74157	2.71349	0.000133448	1	0.103491	0.673797	AKT3; AR; BRAF; BTK; DMPK; ERBB3; FGFR1; FGFR3; FLT4; KIT; LMX1B; MAPT; PINK1; PITX2; RET; ROR2; RPS6KA3; STK11;
Genu varum	1	6	0.374532	12.1032	0.0804787	1	1	1	FGFR3;
GI	2	63	0.749064	2.29741	0.217873	1	1	1	BMPR1A; KIT;
Gibbus deformity	1	1	0.374532	72.0198	0.0138846	1	0.439062	1	NPR2;
Gingival hyperplasia (71%)	1	1	0.374532	72.0198	0.0138846	1	0.439062	1	ROR2;
Glaucoma	2	35	0.749064	4.13481	0.0847457	1	1	1	LMX1B; PITX2;
Glenoid hypoplasia	1	1	0.374532	72.0198	0.0138846	1	0.439062	1	LMX1B;
Glioblastoma multiforme	1	3	0.374532	24.1661	0.0410801	1	0.916281	1	ERBB2;
Gliomas may occur in association with other hereditary tumor syndromes (see	1	3	0.374532	24.1661	0.0410801	1	0.916281	1	ERBB2;
Gliosis	2	11	0.749064	13.148	0.00972533	1	0.439062	1	CSF1R; MAPT;
Gliosis in the substantia nigra	1	1	0.374532	72.0198	0.0138846	1	0.439062	1	LRRK2;
Glomerulonephritis	1	1	0.374532	72.0198	0.0138846	1	0.439062	1	LMX1B;
Granulovacuolar degeneration	1	1	0.374532	72.0198	0.0138846	1	0.439062	1	MAPT;
Growth	17	609	6.36704	2.01155	0.00516863	1	0.439062	1	AKT1; AKT2; AKT3; AR; BMPR1A; BRAF; BTK; DDR2; FGFR1; FGFR3; IGF1R; LMX1B; NPR2; RET; ROR2; RPS6KA3; ZAP70;
Growth hormone deficiency	2	11	0.749064	13.148	0.00972533	1	0.439062	1	BTK; PITX2;
GU	3	73	1.1236	2.96918	0.0811688	1	1	1	AMHR2; FGFR1; FGFR3;
Gynecomastia	2	9	0.749064	16.0666	0.00648326	1	0.439062	1	AKT2; AR;
Gynecomastia with Sertoli cell tumors	1	1	0.374532	72.0198	0.0138846	1	0.439062	1	STK11;
Hair	9	240	3.37079	2.70363	0.00653374	1	0.439062	1	ACVR1; AR; BRAF; DMPK; FGFR1; FGFR3; NTRK1; OCA2; RPS6KA3;
Hair bulbs will pigment when incubated with tyrosine	1	2	0.374532	36.1891	0.027577	1	0.707971	1	OCA2;
Hair darkens with age	1	2	0.374532	36.1891	0.027577	1	0.707971	1	OCA2;
Hallucinations	1	30	0.374532	2.42386	0.342805	1	1	1	AKT1;
Hallux valgus	1	9	0.374532	8.07325	0.118264	1	1	1	ACVR1;
Hamartomatous polyps (stomach to rectum)	1	1	0.374532	72.0198	0.0138846	1	0.439062	1	STK11;
Hands	16	349	5.99251	3.30374	3.22566e-05	0.713	0.0389853	0.25382	ACVR1; AKT3; BRAF; DDR2; FGFR1; FGFR3; IGF1R; KIT; LMX1B; NPR2; NTRK1; PDGFRA; RET; ROR2; RPS6KA3; STK11;
Head	10	345	3.74532	2.08956	0.0228304	1	0.707971	1	AKT1; AKT3; BRAF; BTK; FGFR1; FGFR3; IGF1R; NPR2; ROR2; RPS6KA3;
Head and Neck	25	954	9.3633	1.88805	0.00178875	1	0.439062	1	ACVR1; AKT1; AKT2; AKT3; AR; BRAF; BTK; DDR2; DMPK; ERBB3; FGFR1; FGFR3; IGF1R; LMX1B; LRRK2; MAPT; NPR2; NTRK1; OCA2; PITX2; PRKCG; RET; ROR2; RPS6KA3; STK11;
Hearing loss	2	41	0.749064	3.52987	0.110753	1	1	1	BRAF; BTK;
Hearing loss, mixed conductive-sensorineural	1	3	0.374532	24.1661	0.0410801	1	0.916281	1	FGFR3;
Hearing loss, sensorineural	1	38	0.374532	1.91371	0.412469	1	1	1	FGFR3;
Heart	7	351	2.62172	1.4383	0.216923	1	1	1	AKT3; BRAF; DMPK; ERBB3; MYLK2; ROR2; RPS6KA3;
Heart block	1	2	0.374532	36.1891	0.027577	1	0.707971	1	DMPK;
Heavy eyebrows	1	4	0.374532	18.1397	0.0543964	1	1	1	RPS6KA3;
Height	13	290	4.86891	3.23085	0.000220776	1	0.13943	0.907779	AKT3; AR; BRAF; BTK; DDR2; FGFR1; FGFR3; IGF1R; LMX1B; NPR2; RET; ROR2; RPS6KA3;
Hemangioma	1	3	0.374532	24.1661	0.0410801	1	0.916281	1	FLT4;
HEMANGIOMA, CAPILLARY INFANTILE	1	3	0.374532	24.1661	0.0410801	1	0.916281	1	FLT4;
Hematology	1	229	0.374532	0.317628	0.960089	1	1	1	STK11;
Hematuria	1	7	0.374532	10.3766	0.0932498	1	1	1	LMX1B;
Heme	3	78	1.1236	2.77887	0.0945275	1	1	1	BMPR1A; FLT3; KIT;
Hemifacial palsy	1	1	0.374532	72.0198	0.0138846	1	0.439062	1	ERBB3;
Hemihypertrophy	1	3	0.374532	24.1661	0.0410801	1	0.916281	1	AKT1;
Hemihypertrophy, left-sided	1	1	0.374532	72.0198	0.0138846	1	0.439062	1	AKT2;
Hepatomegaly	1	130	0.374532	0.559496	0.83859	1	1	1	ZAP70;
Hereditary nonpolyposis colorectal carcinoma	2	25	0.749064	5.78808	0.0467235	1	1	1	AKT1; FGFR3;
Heterochromia iridis	1	3	0.374532	24.1661	0.0410801	1	0.916281	1	KIT;
High-arched palate	4	86	1.49813	3.35774	0.0318304	1	0.813386	1	BRAF; DDR2; FGFR1; FGFR3;
High arched palate	1	32	0.374532	2.27242	0.360956	1	1	1	RET;
Highest incidence in men of European descent	3	3	1.1236	72.0198	2.64709e-06	0.0585113	0.00344184	0.0224086	FGFR3; KIT; STK11;
High frequency in equatorial Africa	1	2	0.374532	36.1891	0.027577	1	0.707971	1	OCA2;
High FSH secondary to androgen insensitivity	1	1	0.374532	72.0198	0.0138846	1	0.439062	1	AR;
Highly collagenized connective tissue	1	1	0.374532	72.0198	0.0138846	1	0.439062	1	AKT1;
Highly variable phenotype that includes several subtypes (see, e.g.,	1	2	0.374532	36.1891	0.027577	1	0.707971	1	MAPT;
Highly variable phenotype with regard to pigmentation	1	2	0.374532	36.1891	0.027577	1	0.707971	1	OCA2;
High myopia	1	7	0.374532	10.3766	0.0932498	1	1	1	ERBB3;
High palate	1	9	0.374532	8.07325	0.118264	1	1	1	RPS6KA3;
High refractive errors (hyperopia, myopia, with-the-rule astigmatism)	1	3	0.374532	24.1661	0.0410801	1	0.916281	1	OCA2;
High testosterone	1	1	0.374532	72.0198	0.0138846	1	0.439062	1	AR;
Hip subluxation	1	4	0.374532	18.1397	0.0543964	1	1	1	DDR2;
Hirschsprung disease	1	6	0.374532	12.1032	0.0804787	1	1	1	RET;
Hirschsprung disease (16%)	1	6	0.374532	12.1032	0.0804787	1	1	1	RET;
Hydrocele	1	3	0.374532	24.1661	0.0410801	1	0.916281	1	FLT4;
Hydrocephalus	4	49	1.49813	5.89266	0.00471587	1	0.439062	1	AKT3; BRAF; FGFR1; FGFR3;
Hydrocephalus, occasional	1	1	0.374532	72.0198	0.0138846	1	0.439062	1	FGFR3;
Hydronephrosis	3	38	1.1236	5.70323	0.0156087	1	0.492174	1	BRAF; ERBB3; ROR2;
Hyperactivity in 50% of patients	1	1	0.374532	72.0198	0.0138846	1	0.439062	1	NTRK1;
Hyperconvex fingernails	1	1	0.374532	72.0198	0.0138846	1	0.439062	1	RPS6KA3;
Hyperextensible fingers	2	2	0.749064	72.0198	0.000192069	1	0.128651	0.837604	BRAF; RPS6KA3;
Hyperkeratosis	1	8	0.374532	9.08115	0.105844	1	1	1	AKT1;
Hyperkeratosis (especially extensor surfaces)	1	1	0.374532	72.0198	0.0138846	1	0.439062	1	BRAF;
Hyperkeratosis over edematous areas	1	1	0.374532	72.0198	0.0138846	1	0.439062	1	FLT4;
Hyperoralia	1	2	0.374532	36.1891	0.027577	1	0.707971	1	MAPT;
Hyperparathyroidism	1	3	0.374532	24.1661	0.0410801	1	0.916281	1	RET;
Hyperphagia	1	3	0.374532	24.1661	0.0410801	1	0.916281	1	MAPT;
Hyperpigmentation (in patients with KIT mutations)	2	4	0.749064	36.0997	0.00113135	1	0.438724	1	KIT; PDGFRA;
Hyperpigmented macules of buccal mucosa	1	1	0.374532	72.0198	0.0138846	1	0.439062	1	STK11;
Hyperpigmented macules of lips	1	1	0.374532	72.0198	0.0138846	1	0.439062	1	STK11;
Hyperpigmented macules or papules showing erythema or edema on trauma	1	1	0.374532	72.0198	0.0138846	1	0.439062	1	KIT;
Hyperpigmented spots on hands (especially palms), arms, feet (especially plantar areas), legs, and lips	1	1	0.374532	72.0198	0.0138846	1	0.439062	1	STK11;
Hyperplasia of the myenteric plexus	2	4	0.749064	36.0997	0.00113135	1	0.438724	1	KIT; PDGFRA;
Hyperreflexia (33%)	1	1	0.374532	72.0198	0.0138846	1	0.439062	1	PINK1;
Hyperreflexia	2	122	0.749064	1.18646	0.507052	1	1	1	CSF1R; PRKCG;
Hypertelorism (100%)	1	2	0.374532	36.1891	0.027577	1	0.707971	1	ROR2;
Hypertelorism	5	121	1.87266	2.98173	0.0269195	1	0.707971	1	BRAF; DDR2; FGFR1; FGFR3; RPS6KA3;
Hypertension	1	57	0.374532	1.27592	0.549833	1	1	1	RET;
Hypertensive retinopathy	1	8	0.374532	9.08115	0.105844	1	1	1	RET;
Hypertonia	1	21	0.374532	3.46216	0.254554	1	1	1	BRAF;
Hypertrophic cardiomyopathy	2	45	0.749064	3.21617	0.129093	1	1	1	BRAF; MYLK2;
Hypoalbuminemia	1	10	0.374532	7.26673	0.130513	1	1	1	BMPR1A;
Hypodontia	2	51	0.749064	2.83787	0.157765	1	1	1	FGFR3; RPS6KA3;
Hypodontia (maxillary incisors)	1	1	0.374532	72.0198	0.0138846	1	0.439062	1	PITX2;
Hypogonadism	2	19	0.749064	7.61493	0.0281141	1	0.720922	1	AR; DMPK;
Hypogonadotrophic hypogonadism	1	3	0.374532	24.1661	0.0410801	1	0.916281	1	FGFR1;
Hypoinsulinemic hypoglycemia	1	1	0.374532	72.0198	0.0138846	1	0.439062	1	AKT2;
Hypoplasia of first ribs	1	1	0.374532	72.0198	0.0138846	1	0.439062	1	LMX1B;
Hypoplasia or absence of the corpus callosum	1	1	0.374532	72.0198	0.0138846	1	0.439062	1	BRAF;
Hypoplastic/absent metacarpals	1	1	0.374532	72.0198	0.0138846	1	0.439062	1	ROR2;
Hypoplastic/absent phalanges	1	1	0.374532	72.0198	0.0138846	1	0.439062	1	ROR2;
Hypoplastic/aplastic distal phalanges	1	1	0.374532	72.0198	0.0138846	1	0.439062	1	ROR2;
Hypoplastic/aplastic distal phalanges (fingers 2-5)	1	1	0.374532	72.0198	0.0138846	1	0.439062	1	ROR2;
Hypoplastic/aplastic fingernails	1	1	0.374532	72.0198	0.0138846	1	0.439062	1	ROR2;
Hypoplastic mastoids	1	1	0.374532	72.0198	0.0138846	1	0.439062	1	RPS6KA3;
Hypoplastic middle phalanges (fingers 2-5)	1	1	0.374532	72.0198	0.0138846	1	0.439062	1	ROR2;
Hypoplastic odontoid process	1	3	0.374532	24.1661	0.0410801	1	0.916281	1	DDR2;
Hypoplastic or absent patella (60-90%)	1	1	0.374532	72.0198	0.0138846	1	0.439062	1	LMX1B;
Hypoplastic sacrum	1	1	0.374532	72.0198	0.0138846	1	0.439062	1	ROR2;
Hypoplastic sinuses	1	1	0.374532	72.0198	0.0138846	1	0.439062	1	RPS6KA3;
Hypoplastic toenails	1	2	0.374532	36.1891	0.027577	1	0.707971	1	FGFR1;
Hyporeflexia	1	75	0.374532	0.969738	0.650299	1	1	1	AR;
Hyposmia	1	4	0.374532	18.1397	0.0543964	1	1	1	LRRK2;
Hypospadias	3	55	1.1236	3.94073	0.0409225	1	0.916281	1	AR; FGFR1; PITX2;
Hypospadias, perineal	1	1	0.374532	72.0198	0.0138846	1	0.439062	1	AR;
Hypotelorism	1	11	0.374532	6.60672	0.142591	1	1	1	FGFR1;
Hypotonia	4	233	1.49813	1.23943	0.405948	1	1	1	BRAF; DDR2; RET; RPS6KA3;
Hypotonia (congenital form)	1	1	0.374532	72.0198	0.0138846	1	0.439062	1	DMPK;
Hypotonia in infancy and early childhood	1	1	0.374532	72.0198	0.0138846	1	0.439062	1	FGFR3;
Hypotrichosis of the scalp	1	1	0.374532	72.0198	0.0138846	1	0.439062	1	NTRK1;
Hypoventilation occurs in the absence of primary neuromuscular, lung, or cardiac disease, or an identifiable brainstem lesion	1	6	0.374532	12.1032	0.0804787	1	1	1	RET;
Hypoxemia and cor pulmonale	1	1	0.374532	72.0198	0.0138846	1	0.439062	1	BTK;
Ichthyosis	1	11	0.374532	6.60672	0.142591	1	1	1	BRAF;
Iliac horns arising from external iliac fossa	1	1	0.374532	72.0198	0.0138846	1	0.439062	1	LMX1B;
Immunology	3	148	1.1236	1.46463	0.338325	1	1	1	BTK; NTRK1; ZAP70;
Imperforate anus	1	16	0.374532	4.54341	0.200523	1	1	1	PITX2;
Inappropriate laughter	1	2	0.374532	36.1891	0.027577	1	0.707971	1	MAPT;
Inappropriate sexual behavior	1	2	0.374532	36.1891	0.027577	1	0.707971	1	MAPT;
Incidence 1/20,000-1/64,000 male births	1	1	0.374532	72.0198	0.0138846	1	0.439062	1	AR;
Incidence of 1 in 50,000 to 1 in 100,000	1	1	0.374532	72.0198	0.0138846	1	0.439062	1	RPS6KA3;
Incomplete penetrance	1	36	0.374532	2.01999	0.395775	1	1	1	PRKCG;
Increased frequency in individuals originating from Western Scotland	1	1	0.374532	72.0198	0.0138846	1	0.439062	1	TGFBR1;
Increased incidence of rectosigmoid cancer	1	1	0.374532	72.0198	0.0138846	1	0.439062	1	BTK;
Increased lumbar lordosis	1	6	0.374532	12.1032	0.0804787	1	1	1	NPR2;
Increased number of circulating lymphocytes	1	1	0.374532	72.0198	0.0138846	1	0.439062	1	ZAP70;
Increased or normal serum growth hormone (GH,	1	1	0.374532	72.0198	0.0138846	1	0.439062	1	IGF1R;
Increased risk of medulloblastoma (rare)	1	3	0.374532	24.1661	0.0410801	1	0.916281	1	AKT3;
Increased serum creatine kinase	1	32	0.374532	2.27242	0.360956	1	1	1	AR;
Increased serum insulin-like growth factor-1 (IGF1,	1	1	0.374532	72.0198	0.0138846	1	0.439062	1	IGF1R;
Increased sweating	1	6	0.374532	12.1032	0.0804787	1	1	1	RET;
Increased tendon reflex	1	3	0.374532	24.1661	0.0410801	1	0.916281	1	AKT3;
Increased urinary epinephrine	1	1	0.374532	72.0198	0.0138846	1	0.439062	1	RET;
Individuals may accumulate more pigment in hair and eyes with age	1	2	0.374532	36.1891	0.027577	1	0.707971	1	OCA2;
Infertility	1	9	0.374532	8.07325	0.118264	1	1	1	AR;
Inguinal hernia (21%)	1	1	0.374532	72.0198	0.0138846	1	0.439062	1	ROR2;
Inguinal hernia	3	44	1.1236	4.92569	0.0230659	1	0.707971	1	AR; FGFR1; RPS6KA3;
Inguinal hernias	1	5	0.374532	14.519	0.0675284	1	1	1	AMHR2;
Insidious onset	1	11	0.374532	6.60672	0.142591	1	1	1	MAPT;
INSULIN-LIKE GROWTH FACTOR I, RESISTANCE TO	1	1	0.374532	72.0198	0.0138846	1	0.439062	1	IGF1R;
Insulin resistance	1	30	0.374532	2.42386	0.342805	1	1	1	AKT2;
Internal Genitalia (Female)	3	96	1.1236	2.25789	0.149032	1	1	1	DMPK; RPS6KA3; STK11;
Internal Genitalia (Male)	8	148	2.99625	3.89757	0.00110023	1	0.438724	1	AR; BTK; DMPK; FGFR1; FGFR3; KIT; ROR2; STK11;
Intestinal bleeding	1	1	0.374532	72.0198	0.0138846	1	0.439062	1	STK11;
Intestinal obstruction	2	8	0.749064	18.0724	0.00508898	1	0.439062	1	KIT; PDGFRA;
Intracellular Lewy bodies	1	4	0.374532	18.1397	0.0543964	1	1	1	MAPT;
Intrauterine growth retardation	1	39	0.374532	1.86465	0.420642	1	1	1	IGF1R;
Intussusception	1	2	0.374532	36.1891	0.027577	1	0.707971	1	STK11;
Irides blue-gray to light brown	1	2	0.374532	36.1891	0.027577	1	0.707971	1	OCA2;
Iris dysplasia (goniodysgenesis)	1	1	0.374532	72.0198	0.0138846	1	0.439062	1	PITX2;
Iris hypoplasia	1	5	0.374532	14.519	0.0675284	1	1	1	PITX2;
Iron deficiency anemia	1	5	0.374532	14.519	0.0675284	1	1	1	STK11;
Irregular areas of radiolucency in metaphyses	1	1	0.374532	72.0198	0.0138846	1	0.439062	1	FGFR1;
Irregularly shaped sperm heads	1	1	0.374532	72.0198	0.0138846	1	0.439062	1	AURKC;
Irritability	1	34	0.374532	2.13878	0.378609	1	1	1	MAPT;
Isochromosome 12p (i(12p))	3	3	1.1236	72.0198	2.64709e-06	0.0585113	0.00344184	0.0224086	FGFR3; KIT; STK11;
Isolated cases	6	49	2.24719	8.83165	5.74055e-05	1	0.0534046	0.347699	FGFR3; KIT; MAPT; PDGFRA; RPS6KA3; STK11;
Jaw fixation	1	1	0.374532	72.0198	0.0138846	1	0.439062	1	ACVR1;
Joint hyperextensibility	1	7	0.374532	10.3766	0.0932498	1	1	1	BRAF;
Joint immobility	1	1	0.374532	72.0198	0.0138846	1	0.439062	1	ACVR1;
Joint laxity	2	36	0.749064	4.01999	0.0889378	1	1	1	NPR2; RET;
Jugular bulb dehiscence (in some patients)	1	1	0.374532	72.0198	0.0138846	1	0.439062	1	FGFR3;
Keratoconus	1	8	0.374532	9.08115	0.105844	1	1	1	LMX1B;
Keratosis pilaris	1	7	0.374532	10.3766	0.0932498	1	1	1	BRAF;
Kidneys	8	276	2.99625	2.09006	0.0394357	1	0.916281	1	AKT3; BRAF; BTK; ERBB3; FGFR3; LMX1B; RET; ROR2;
Kleeblattschaedel deformity	1	1	0.374532	72.0198	0.0138846	1	0.439062	1	FGFR1;
Kluver-Bucy syndrome	1	2	0.374532	36.1891	0.027577	1	0.707971	1	MAPT;
Knee flexion contracture	1	3	0.374532	24.1661	0.0410801	1	0.916281	1	DDR2;
Koilonychia	1	4	0.374532	18.1397	0.0543964	1	1	1	LMX1B;
Kyphoscoliosis	2	34	0.749064	4.25639	0.0806164	1	1	1	AKT1; MAPT;
Kyphosis	3	56	1.1236	3.87037	0.0428097	1	0.952937	1	AKT3; RET; RPS6KA3;
Lab	6	266	2.24719	1.62715	0.166328	1	1	1	AKT1; AKT2; AMHR2; BMPR1A; MAPT; RET;
Laboratory Abnormalities	14	712	5.24345	1.41711	0.12166	1	1	1	AKT1; AKT2; AR; AURKC; BTK; FGFR3; IGF1R; KIT; LMX1B; NTRK1; OCA2; RET; STK11; ZAP70;
Lack of motivation	1	2	0.374532	36.1891	0.027577	1	0.707971	1	MAPT;
Lack of trident hand helps distinguish it from achondroplasia	1	1	0.374532	72.0198	0.0138846	1	0.439062	1	FGFR3;
Language impairment	1	3	0.374532	24.1661	0.0410801	1	0.916281	1	MAPT;
Large anterior fontanel	1	11	0.374532	6.60672	0.142591	1	1	1	ROR2;
Large eyes	1	7	0.374532	10.3766	0.0932498	1	1	1	AKT3;
Large halluces	1	3	0.374532	24.1661	0.0410801	1	0.916281	1	NPR2;
Large hands (in patients with PDGFRA mutations)	2	4	0.749064	36.0997	0.00113135	1	0.438724	1	KIT; PDGFRA;
Large, low-set ears	1	3	0.374532	24.1661	0.0410801	1	0.916281	1	RET;
Large medial incisors	1	1	0.374532	72.0198	0.0138846	1	0.439062	1	RPS6KA3;
Large, open mouth	1	1	0.374532	72.0198	0.0138846	1	0.439062	1	RPS6KA3;
Large penis	1	3	0.374532	24.1661	0.0410801	1	0.916281	1	FGFR1;
Large, prominent eyebrow	1	1	0.374532	72.0198	0.0138846	1	0.439062	1	RET;
Large, soft hands	1	1	0.374532	72.0198	0.0138846	1	0.439062	1	RPS6KA3;
Large spermatozoa	1	1	0.374532	72.0198	0.0138846	1	0.439062	1	AURKC;
Laryngo-, tracheo-, bronchomalacia	1	2	0.374532	36.1891	0.027577	1	0.707971	1	FGFR1;
Late onset	1	31	0.374532	2.3457	0.351944	1	1	1	AKT2;
Later onset may occur	1	1	0.374532	72.0198	0.0138846	1	0.439062	1	FLT4;
Left-sided hemihypertrophy of face	1	1	0.374532	72.0198	0.0138846	1	0.439062	1	AKT2;
Levodopa-induced dyskinesias	1	1	0.374532	72.0198	0.0138846	1	0.439062	1	PINK1;
Levodopa-responsive	2	7	0.749064	20.6505	0.00385192	1	0.439062	1	MAPT; PINK1;
Lewy bodies (not always present)	1	1	0.374532	72.0198	0.0138846	1	0.439062	1	LRRK2;
Lichenification of palms	1	1	0.374532	72.0198	0.0138846	1	0.439062	1	NTRK1;
Limbal stem cell deficiency	1	3	0.374532	24.1661	0.0410801	1	0.916281	1	FGFR3;
Limb dystonia (18%)	1	1	0.374532	72.0198	0.0138846	1	0.439062	1	MAPT;
Limbs	13	339	4.86891	2.76386	0.000960923	1	0.438724	1	ACVR1; AKT1; AKT3; BMPR1A; BTK; DDR2; FGFR1; FGFR3; LMX1B; NPR2; RET; ROR2; RPS6KA3;
Limited elbow and hip extension	1	2	0.374532	36.1891	0.027577	1	0.707971	1	FGFR3;
Limited elbow extension	1	8	0.374532	9.08115	0.105844	1	1	1	NPR2;
Limited elbow supination (37%)	1	1	0.374532	72.0198	0.0138846	1	0.439062	1	ROR2;
Limited extension at elbows	1	1	0.374532	72.0198	0.0138846	1	0.439062	1	FGFR3;
Lipohypoplasia	1	1	0.374532	72.0198	0.0138846	1	0.439062	1	AKT1;
Liver	2	256	0.749064	0.565446	0.873286	1	1	1	BTK; ZAP70;
Long eyelashes (59%)	1	1	0.374532	72.0198	0.0138846	1	0.439062	1	ROR2;
Long face	1	20	0.374532	3.63518	0.244047	1	1	1	AKT1;
Longitudinal ridging	1	5	0.374532	14.519	0.0675284	1	1	1	LMX1B;
Long philtrum	1	54	0.374532	1.34679	0.530492	1	1	1	FGFR1;
Long philtrum (39%)	1	1	0.374532	72.0198	0.0138846	1	0.439062	1	ROR2;
Long, smooth philtrum	1	3	0.374532	24.1661	0.0410801	1	0.916281	1	IGF1R;
Loose, redundant skin on fingers	1	1	0.374532	72.0198	0.0138846	1	0.439062	1	NPR2;
Loose skin	1	3	0.374532	24.1661	0.0410801	1	0.916281	1	RPS6KA3;
Lordosis	1	15	0.374532	4.8461	0.189257	1	1	1	RET;
Loss of dopaminergic neurons	1	4	0.374532	18.1397	0.0543964	1	1	1	MAPT;
Loss of sympathetic fibers innervating eccrine sweat glands	1	1	0.374532	72.0198	0.0138846	1	0.439062	1	NTRK1;
Loss of visual acuity	1	1	0.374532	72.0198	0.0138846	1	0.439062	1	BRAF;
Low bridge	1	3	0.374532	24.1661	0.0410801	1	0.916281	1	AKT3;
Lower thoracic kyphosis	1	1	0.374532	72.0198	0.0138846	1	0.439062	1	NPR2;
Low nasal bridge	3	20	1.1236	10.8336	0.00253312	1	0.439062	1	AKT1; FGFR1; FGFR3;
Low serum levels of branched-chain amino acids	1	1	0.374532	72.0198	0.0138846	1	0.439062	1	AKT2;
Low serum levels of ketone bodies	1	1	0.374532	72.0198	0.0138846	1	0.439062	1	AKT2;
Low-set ears (45%)	1	1	0.374532	72.0198	0.0138846	1	0.439062	1	ROR2;
Low-set ears	2	97	0.749064	1.49222	0.39081	1	1	1	BRAF; FGFR1;
Low-set frontal hairline	1	1	0.374532	72.0198	0.0138846	1	0.439062	1	FGFR3;
Low weight	1	6	0.374532	12.1032	0.0804787	1	1	1	IGF1R;
Lumbar gibbus deformity	1	1	0.374532	72.0198	0.0138846	1	0.439062	1	RPS6KA3;
Lumbar hemivertebrae	1	1	0.374532	72.0198	0.0138846	1	0.439062	1	FGFR1;
Lumbar kyphosis in infancy	1	1	0.374532	72.0198	0.0138846	1	0.439062	1	FGFR3;
Lung	13	171	4.86891	5.47908	8.15373e-07	0.018023	0.00344184	0.0224086	ACVR1; AKT1; BRAF; BTK; DDR2; EGFR; ERBB2; ERBB3; FGFR3; MAP3K8; RET; STK11; ZAP70;
LUNG CANCER	4	16	1.49813	18.0387	5.79855e-05	1	0.0534046	0.347699	BRAF; EGFR; ERBB2; MAP3K8;
Lung cysts	1	2	0.374532	36.1891	0.027577	1	0.707971	1	AKT1;
Lung hypoplasia	1	4	0.374532	18.1397	0.0543964	1	1	1	RET;
Luxuriant scalp hair	1	1	0.374532	72.0198	0.0138846	1	0.439062	1	AR;
Lymphangioma	1	1	0.374532	72.0198	0.0138846	1	0.439062	1	AKT1;
Lymphatic malformations	1	1	0.374532	72.0198	0.0138846	1	0.439062	1	AKT1;
LYMPHEDEMA, HEREDITARY, IA	1	1	0.374532	72.0198	0.0138846	1	0.439062	1	FLT4;
Lymphedema, predominantly in the lower limbs	1	2	0.374532	36.1891	0.027577	1	0.707971	1	FLT4;
Lymphedema that presents at puberty is called Meige disease (	1	1	0.374532	72.0198	0.0138846	1	0.439062	1	FLT4;
Lymphography shows hypoplasia of lymphatic vessels	1	1	0.374532	72.0198	0.0138846	1	0.439062	1	FLT4;
Macrocephaly (26%)	1	1	0.374532	72.0198	0.0138846	1	0.439062	1	ROR2;
Macrocephaly	3	60	1.1236	3.61239	0.050785	1	1	1	AKT1; AKT3; FGFR3;
Macrocephaly, relative	1	4	0.374532	18.1397	0.0543964	1	1	1	BRAF;
Macroglossia	1	18	0.374532	4.03887	0.222588	1	1	1	ROR2;
Macrosomia, neonatal	1	1	0.374532	72.0198	0.0138846	1	0.439062	1	AKT2;
Majority of cases are secondary to de novo mutation	1	1	0.374532	72.0198	0.0138846	1	0.439062	1	ACVR1;
Male germ cell tumors (GCT), 2 subtypes -	3	3	1.1236	72.0198	2.64709e-06	0.0585113	0.00344184	0.0224086	FGFR3; KIT; STK11;
Male pseudohermaphroditism	1	4	0.374532	18.1397	0.0543964	1	1	1	AR;
Malformed first metatarsal	1	1	0.374532	72.0198	0.0138846	1	0.439062	1	ACVR1;
Malformed sternum	1	1	0.374532	72.0198	0.0138846	1	0.439062	1	LMX1B;
Malignant eosinophil proliferation	1	1	0.374532	72.0198	0.0138846	1	0.439062	1	PDGFRB;
Malignant sex-cord stromal tumor	1	1	0.374532	72.0198	0.0138846	1	0.439062	1	AR;
Malocclusion	2	15	0.749064	9.64423	0.0179014	1	0.561266	1	BRAF; RPS6KA3;
Mandibular prognathism	1	6	0.374532	12.1032	0.0804787	1	1	1	FGFR1;
Marfanoid body habitus	1	1	0.374532	72.0198	0.0138846	1	0.439062	1	RET;
Markedly decreased small unmyelinated nerve fibers	1	1	0.374532	72.0198	0.0138846	1	0.439062	1	NTRK1;
Marked shortness and bowing of long bones	1	1	0.374532	72.0198	0.0138846	1	0.439062	1	FGFR3;
Masked facies	1	7	0.374532	10.3766	0.0932498	1	1	1	MAPT;
MAST CELL DISEASE	1	1	0.374532	72.0198	0.0138846	1	0.439062	1	KIT;
Maxillary hypoplasia	2	20	0.749064	7.23437	0.0309564	1	0.791969	1	FGFR1; PITX2;
May show good response to levodopa	1	1	0.374532	72.0198	0.0138846	1	0.439062	1	MAPT;
Mean age at onset 45 years	1	2	0.374532	36.1891	0.027577	1	0.707971	1	MAPT;
Mean age of onset 31 years (range 5-60)	1	1	0.374532	72.0198	0.0138846	1	0.439062	1	PRKCG;
Mean age of onset, 5 years	1	1	0.374532	72.0198	0.0138846	1	0.439062	1	ACVR1;
Mean female height, 124 cm	1	1	0.374532	72.0198	0.0138846	1	0.439062	1	FGFR3;
Mean male adult height, 131 cm	1	1	0.374532	72.0198	0.0138846	1	0.439062	1	FGFR3;
Meckel diverticulum	1	3	0.374532	24.1661	0.0410801	1	0.916281	1	FGFR1;
Medially deviated, broad great toes	1	2	0.374532	36.1891	0.027577	1	0.707971	1	FGFR1;
Median survival 5.7 years	1	1	0.374532	72.0198	0.0138846	1	0.439062	1	MAPT;
Medullary thyroid cancer is aggressive and can occur in childhood	1	1	0.374532	72.0198	0.0138846	1	0.439062	1	RET;
Medullary thyroid carcinoma	2	2	0.749064	72.0198	0.000192069	1	0.128651	0.837604	NTRK1; RET;
Medullated corneal nerve fibers	1	1	0.374532	72.0198	0.0138846	1	0.439062	1	RET;
Megacolon	1	4	0.374532	18.1397	0.0543964	1	1	1	RET;
Megalencephaly	2	6	0.749064	24.0865	0.00277677	1	0.439062	1	AKT3; FGFR3;
Megalocornea	1	5	0.374532	14.519	0.0675284	1	1	1	PITX2;
Megaspondylodysplasia	1	1	0.374532	72.0198	0.0138846	1	0.439062	1	AKT1;
Memory loss	2	13	0.749064	11.1268	0.0135427	1	0.439062	1	CSF1R; PRKCG;
Meningitis	1	9	0.374532	8.07325	0.118264	1	1	1	BTK;
Mental retardation (18% of patients)	1	1	0.374532	72.0198	0.0138846	1	0.439062	1	ROR2;
Mental retardation	3	200	1.1236	1.08384	0.527292	1	1	1	FGFR3; NTRK1; RPS6KA3;
Mental retardation (6%)	1	1	0.374532	72.0198	0.0138846	1	0.439062	1	ACVR1;
Mental retardation, profound	1	12	0.374532	6.05662	0.154503	1	1	1	AKT3;
Mesomelia (100%)	1	1	0.374532	72.0198	0.0138846	1	0.439062	1	ROR2;
Metabolic Features	3	195	1.1236	1.11163	0.510288	1	1	1	AKT2; NTRK1; RET;
Metaphyseal flaring	1	7	0.374532	10.3766	0.0932498	1	1	1	FGFR3;
Metaphyseal flaring (distal femora, proximal tibiae)	1	1	0.374532	72.0198	0.0138846	1	0.439062	1	DDR2;
Metaphyseal flaring of long bones	1	2	0.374532	36.1891	0.027577	1	0.707971	1	NPR2;
Metaphyseal widening	1	2	0.374532	36.1891	0.027577	1	0.707971	1	ACVR1;
Metatarsus varus	1	10	0.374532	7.26673	0.130513	1	1	1	DDR2;
Microcephaly	3	129	1.1236	1.68033	0.266399	1	1	1	FGFR1; IGF1R; RPS6KA3;
Microcornea	2	18	0.749064	8.03775	0.0253837	1	0.707971	1	LMX1B; PITX2;
Micrognathia	3	121	1.1236	1.79142	0.236639	1	1	1	BRAF; DDR2; ERBB3;
Micrognathia (68%)	1	1	0.374532	72.0198	0.0138846	1	0.439062	1	ROR2;
Micrographia	1	6	0.374532	12.1032	0.0804787	1	1	1	MAPT;
Micropenis	1	21	0.374532	3.46216	0.254554	1	1	1	AR;
Microphakia	1	1	0.374532	72.0198	0.0138846	1	0.439062	1	LMX1B;
Midface hypoplasia	2	38	0.749064	3.80847	0.0975001	1	1	1	FGFR1; FGFR3;
Midface hypoplasia (94%)	1	1	0.374532	72.0198	0.0138846	1	0.439062	1	ROR2;
Mild cognitive deterioration in adults	1	1	0.374532	72.0198	0.0138846	1	0.439062	1	DMPK;
Milder expression in female heterozygotes	1	1	0.374532	72.0198	0.0138846	1	0.439062	1	RPS6KA3;
Mild frontal bossing	1	1	0.374532	72.0198	0.0138846	1	0.439062	1	FGFR3;
Mildly thin corpus callosum	1	3	0.374532	24.1661	0.0410801	1	0.916281	1	AKT3;
Mild symptoms may occur in teenage years	1	1	0.374532	72.0198	0.0138846	1	0.439062	1	AR;
Mild to moderate mental retardation	1	1	0.374532	72.0198	0.0138846	1	0.439062	1	BRAF;
Misc	8	219	2.99625	2.63403	0.0116908	1	0.439062	1	AKT2; FLT3; FLT4; KIT; MAPT; RET; STK11; TGFBR2;
Miscellaneous	29	1228	10.8614	1.70137	0.00363853	1	0.439062	1	ACVR1; AKT1; AR; BRAF; BTK; CSF1R; DMPK; ERBB2; ERBB3; FGFR1; FGFR3; FLT4; IGF1R; KIT; LRRK2; MAPT; NPR2; NTRK1; OCA2; PDGFRA; PDGFRB; PINK1; PITX2; PRKCG; RET; ROR2; RPS6KA3; STK11; TGFBR1;
Misrouting of the optic nerves at the chiasm	1	3	0.374532	24.1661	0.0410801	1	0.916281	1	OCA2;
Mitral insufficiency	1	4	0.374532	18.1397	0.0543964	1	1	1	RPS6KA3;
Mitral regurgitation, mild	1	4	0.374532	18.1397	0.0543964	1	1	1	AKT3;
Monophalangism of first metatarsal	1	1	0.374532	72.0198	0.0138846	1	0.439062	1	ACVR1;
Monotonous speech	1	4	0.374532	18.1397	0.0543964	1	1	1	MAPT;
More prevalent in females	1	1	0.374532	72.0198	0.0138846	1	0.439062	1	FLT4;
Mosaic distribution of lesions	1	1	0.374532	72.0198	0.0138846	1	0.439062	1	AKT1;
Most affected infants die shortly after birth from respiratory failure	1	1	0.374532	72.0198	0.0138846	1	0.439062	1	ERBB3;
Most cases are caused by mutation in the PHOX2B gene	1	6	0.374532	12.1032	0.0804787	1	1	1	RET;
Most cases are sporadic	1	10	0.374532	7.26673	0.130513	1	1	1	BRAF;
Most cases do not have mutations in the MAPT gene, but map to chromosome 17q	1	2	0.374532	36.1891	0.027577	1	0.707971	1	MAPT;
Most common cancer in men aged 15-40 years	3	3	1.1236	72.0198	2.64709e-06	0.0585113	0.00344184	0.0224086	FGFR3; KIT; STK11;
Most sporadic as single lesions	1	3	0.374532	24.1661	0.0410801	1	0.916281	1	FLT4;
Motor symptoms may be present	1	2	0.374532	36.1891	0.027577	1	0.707971	1	MAPT;
Mouth	16	417	5.99251	2.76501	0.00025492	1	0.156521	1	ACVR1; AKT1; AKT3; AR; BRAF; DDR2; FGFR1; FGFR3; IGF1R; LMX1B; NTRK1; PITX2; RET; ROR2; RPS6KA3; STK11;
Movement	3	29	1.1236	7.47258	0.0074068	1	0.439062	1	DMPK; ERBB3; FGFR3;
Multifactorial	1	31	0.374532	2.3457	0.351944	1	1	1	MAPT;
Multifactorial predisposition	1	5	0.374532	14.519	0.0675284	1	1	1	PRKCH;
Multiple gastrointestinal polyps	1	2	0.374532	36.1891	0.027577	1	0.707971	1	BMPR1A;
Multiple gene loci involved in causation of schizophrenia	1	14	0.374532	5.19201	0.177834	1	1	1	AKT1;
Multiple lentigines	1	1	0.374532	72.0198	0.0138846	1	0.439062	1	BRAF;
Multiple nevi	1	4	0.374532	18.1397	0.0543964	1	1	1	FGFR3;
Multiple palmar creases	1	1	0.374532	72.0198	0.0138846	1	0.439062	1	BRAF;
Multiple plantar creases	1	1	0.374532	72.0198	0.0138846	1	0.439062	1	BRAF;
Multi-tailed spermatozoa	1	1	0.374532	72.0198	0.0138846	1	0.439062	1	AURKC;
Muscle atrophy	1	39	0.374532	1.86465	0.420642	1	1	1	AKT3;
Muscle biopsy shows neurogenic atrophy	1	2	0.374532	36.1891	0.027577	1	0.707971	1	AR;
Muscle cramping	1	1	0.374532	72.0198	0.0138846	1	0.439062	1	AR;
Muscle, Soft Tissue	10	341	3.74532	2.11407	0.0212688	1	0.66402	1	ACVR1; AKT3; AR; BTK; DMPK; FLT4; LMX1B; MYLK2; PDGFRB; RET;
Mutism	2	9	0.749064	16.0666	0.00648326	1	0.439062	1	CSF1R; MAPT;
Myclonus (rare)	1	1	0.374532	72.0198	0.0138846	1	0.439062	1	PRKCG;
MYELOPROLIFERATIVE DISORDER, CHRONIC, WITH EOSINOPHILIA	1	1	0.374532	72.0198	0.0138846	1	0.439062	1	PDGFRB;
Myofibromatosis affecting skin, muscle, bone, and viscera	1	1	0.374532	72.0198	0.0138846	1	0.439062	1	PDGFRB;
Myopathy	1	12	0.374532	6.05662	0.154503	1	1	1	RET;
Myopia	1	47	0.374532	1.54733	0.482083	1	1	1	BRAF;
Myosin storage myopathy (in some patients)	1	3	0.374532	24.1661	0.0410801	1	0.916281	1	MYLK2;
Myotonia (delayed muscle relaxation after contraction)	1	1	0.374532	72.0198	0.0138846	1	0.439062	1	DMPK;
Nail dysplasia (35%)	1	1	0.374532	72.0198	0.0138846	1	0.439062	1	ROR2;
Nails	7	123	2.62172	4.10421	0.00166345	1	0.439062	1	FGFR1; FLT4; LMX1B; NPR2; NTRK1; ROR2; RPS6KA3;
Narrow iliac wings	1	2	0.374532	36.1891	0.027577	1	0.707971	1	RPS6KA3;
Narrow palate	1	13	0.374532	5.59108	0.16625	1	1	1	RPS6KA3;
Narrow sacroiliac groove	1	1	0.374532	72.0198	0.0138846	1	0.439062	1	FGFR3;
Narrow thoracolumbar interpediculate distance	1	1	0.374532	72.0198	0.0138846	1	0.439062	1	NPR2;
Narrow thorax	1	11	0.374532	6.60672	0.142591	1	1	1	FGFR3;
Nasal obstruction	1	1	0.374532	72.0198	0.0138846	1	0.439062	1	FGFR1;
Nasal polyps	1	3	0.374532	24.1661	0.0410801	1	0.916281	1	STK11;
Nasolacrimal duct obstruction	1	5	0.374532	14.519	0.0675284	1	1	1	FGFR3;
Nasopharynx	2	34	0.749064	4.25639	0.0806164	1	1	1	BTK; FGFR1;
Neck	4	130	1.49813	2.22136	0.107499	1	1	1	DDR2; FGFR1; RET; ROR2;
Negative repeat expansion (reverse anticipation) can occur (approximately 5% of the time)	1	1	0.374532	72.0198	0.0138846	1	0.439062	1	DMPK;
Neoplasia	10	151	3.74532	4.77398	5.0643e-05	1	0.0533053	0.347053	AKT1; AKT3; AR; BTK; ERBB2; FGFR3; KIT; RET; STK11; TGFBR1;
Nephrosclerosis	1	3	0.374532	24.1661	0.0410801	1	0.916281	1	FGFR3;
Nephrotic syndrome	1	16	0.374532	4.54341	0.200523	1	1	1	LMX1B;
Neuro	4	132	1.49813	2.18771	0.112016	1	1	1	FGFR1; MAPT; PRKCH; RET;
Neuroblastoma	1	11	0.374532	6.60672	0.142591	1	1	1	RET;
Neurofibrillary degeneration of the hippocampus, basal ganglia and brainstem nuclei	1	1	0.374532	72.0198	0.0138846	1	0.439062	1	MAPT;
Neurofibrillary MAPT (tau)-positive tangles	1	1	0.374532	72.0198	0.0138846	1	0.439062	1	LRRK2;
Neurofibrillary tangles	1	3	0.374532	24.1661	0.0410801	1	0.916281	1	MAPT;
Neurogenic muscle atrophy, especially in the lower limbs	1	1	0.374532	72.0198	0.0138846	1	0.439062	1	ERBB3;
Neurologic	24	930	8.98876	1.85933	0.00268402	1	0.439062	1	ACVR1; AKT1; AKT2; AKT3; AR; BRAF; BTK; CSF1R; DDR2; DMPK; ERBB3; FGFR1; FGFR3; IGF1R; LMX1B; LRRK2; MAPT; NPR2; NTRK1; PINK1; PRKCG; RET; ROR2; RPS6KA3;
Neuromas of lips and tongue	1	1	0.374532	72.0198	0.0138846	1	0.439062	1	RET;
Neuronal loss	2	8	0.749064	18.0724	0.00508898	1	0.439062	1	CSF1R; MAPT;
Neuronal loss and gliosis in the substantia nigra pars compacta	1	5	0.374532	14.519	0.0675284	1	1	1	MAPT;
Neuronal loss in the substantia nigra	1	2	0.374532	36.1891	0.027577	1	0.707971	1	LRRK2;
Neuropathic arthropathy	1	2	0.374532	36.1891	0.027577	1	0.707971	1	NTRK1;
Neuropathology shows neuronal loss in basal ganglia, brainstem, and cerebellum	1	1	0.374532	72.0198	0.0138846	1	0.439062	1	MAPT;
Neurosensory hearing loss	1	1	0.374532	72.0198	0.0138846	1	0.439062	1	FGFR1;
Neurotrophic keratitis	1	1	0.374532	72.0198	0.0138846	1	0.439062	1	NTRK1;
NEVUS, EPIDERMAL	1	4	0.374532	18.1397	0.0543964	1	1	1	FGFR3;
Nevus flammeus	1	2	0.374532	36.1891	0.027577	1	0.707971	1	ROR2;
Nodular goiter	1	1	0.374532	72.0198	0.0138846	1	0.439062	1	RET;
No elevation of free fatty acids	1	1	0.374532	72.0198	0.0138846	1	0.439062	1	AKT2;
No fetal hydrops	1	1	0.374532	72.0198	0.0138846	1	0.439062	1	ERBB3;
No language	1	3	0.374532	24.1661	0.0410801	1	0.916281	1	AKT3;
Non-immune fetal hydrops (rare)	1	1	0.374532	72.0198	0.0138846	1	0.439062	1	FLT4;
Noninsulin-dependent diabetes mellitus	1	30	0.374532	2.42386	0.342805	1	1	1	AKT2;
Nonseminoma (embryonal carcinoma, teratoma, choriocarcinoma, endodermal sinus tumor)	3	3	1.1236	72.0198	2.64709e-06	0.0585113	0.00344184	0.0224086	FGFR3; KIT; STK11;
Normal 46,XY karyotype	1	2	0.374532	36.1891	0.027577	1	0.707971	1	AR;
Normal - 5 to 37 copies of (CTG)n repeat in DMPK (	1	1	0.374532	72.0198	0.0138846	1	0.439062	1	DMPK;
Normal activity of natural killer cells	1	1	0.374532	72.0198	0.0138846	1	0.439062	1	ZAP70;
Normal birth length	1	8	0.374532	9.08115	0.105844	1	1	1	RPS6KA3;
Normal birth weight	2	7	0.749064	20.6505	0.00385192	1	0.439062	1	NPR2; RPS6KA3;
Normal-elevated plasma testosterone (male range)	1	1	0.374532	72.0198	0.0138846	1	0.439062	1	AR;
Normal head circumference	1	3	0.374532	24.1661	0.0410801	1	0.916281	1	NPR2;
Normal height	1	5	0.374532	14.519	0.0675284	1	1	1	FGFR3;
Normal intelligence	2	45	0.749064	3.21617	0.129093	1	1	1	FGFR1; NPR2;
Normal lacrimation	1	1	0.374532	72.0198	0.0138846	1	0.439062	1	NTRK1;
Normal lung histology	1	1	0.374532	72.0198	0.0138846	1	0.439062	1	ERBB3;
Normal male karyotype (46,XY)	1	1	0.374532	72.0198	0.0138846	1	0.439062	1	AR;
Normal/mild midface hypoplasia	1	1	0.374532	72.0198	0.0138846	1	0.439062	1	FGFR3;
Normal number of B cells	1	3	0.374532	24.1661	0.0410801	1	0.916281	1	ZAP70;
Normal number of circulating lymphocytes	1	1	0.374532	72.0198	0.0138846	1	0.439062	1	ZAP70;
Normal number of natural killer cells	1	2	0.374532	36.1891	0.027577	1	0.707971	1	ZAP70;
Normal number of T cells	1	2	0.374532	36.1891	0.027577	1	0.707971	1	BTK;
Normal respiratory rate	1	6	0.374532	12.1032	0.0804787	1	1	1	RET;
Nose	14	314	5.24345	3.21327	0.000134571	1	0.103491	0.673797	AKT1; AKT3; BRAF; DDR2; FGFR1; FGFR3; IGF1R; LRRK2; MAPT; NPR2; PITX2; ROR2; RPS6KA3; STK11;
No tanning	1	2	0.374532	36.1891	0.027577	1	0.707971	1	OCA2;
Nystagmus	3	122	1.1236	1.77674	0.240329	1	1	1	BRAF; OCA2; PRKCG;
Obsessive-compulsive traits	1	1	0.374532	72.0198	0.0138846	1	0.439062	1	DMPK;
Obsessive tendencies	1	1	0.374532	72.0198	0.0138846	1	0.439062	1	IGF1R;
Occasional deafness	1	2	0.374532	36.1891	0.027577	1	0.707971	1	KIT;
Occasionally germ cell tumor arise from extra gonadal site (e.g., mediastinum, retroperitoneum, pineal gland)	3	3	1.1236	72.0198	2.64709e-06	0.0585113	0.00344184	0.0224086	FGFR3; KIT; STK11;
Occasional mental retardation	2	3	0.749064	48.093	0.000570912	1	0.294144	1	FGFR1; FGFR3;
Oculomotor apraxia	1	10	0.374532	7.26673	0.130513	1	1	1	BRAF;
Oligodendrogliomas	1	3	0.374532	24.1661	0.0410801	1	0.916281	1	ERBB2;
Oligohydramnios	1	12	0.374532	6.05662	0.154503	1	1	1	RET;
Oligospermia or azoospermia	1	1	0.374532	72.0198	0.0138846	1	0.439062	1	AR;
Omphalocele	1	14	0.374532	5.19201	0.177834	1	1	1	FGFR1;
Oncology	9	80	3.37079	8.11022	1.64448e-06	0.0363497	0.00344184	0.0224086	AKT1; AR; BMPR1A; FGFR3; KIT; NTRK1; PDGFRB; RET; TGFBR2;
One of the 2 most common forms of OCA in the world along with OCA1	1	2	0.374532	36.1891	0.027577	1	0.707971	1	OCA2;
Onset 50 to 65 years	1	1	0.374532	72.0198	0.0138846	1	0.439062	1	LRRK2;
Onset at birth or in early childhood	1	2	0.374532	36.1891	0.027577	1	0.707971	1	PDGFRB;
Onset in infancy	2	82	0.749064	1.76515	0.315499	1	1	1	AKT1; NTRK1;
Onset in third decade	1	3	0.374532	24.1661	0.0410801	1	0.916281	1	MAPT;
Onset in utero	2	15	0.749064	9.64423	0.0179014	1	0.561266	1	IGF1R; RET;
Onset mid to late adulthood	1	4	0.374532	18.1397	0.0543964	1	1	1	MAPT;
Onset often in late adolescence	1	14	0.374532	5.19201	0.177834	1	1	1	AKT1;
Onset usually at birth	2	10	0.749064	14.4615	0.0080302	1	0.439062	1	FLT4; RET;
Onset usually between 30 and 50 years of age	1	1	0.374532	72.0198	0.0138846	1	0.439062	1	AR;
Open bite	1	1	0.374532	72.0198	0.0138846	1	0.439062	1	BRAF;
Open mouth	2	9	0.749064	16.0666	0.00648326	1	0.439062	1	AKT1; BRAF;
Optic nerve dysplasia	1	1	0.374532	72.0198	0.0138846	1	0.439062	1	BRAF;
Oral candidiasis	1	3	0.374532	24.1661	0.0410801	1	0.916281	1	FGFR3;
Ossification evident 2-8 months following swelling	1	1	0.374532	72.0198	0.0138846	1	0.439062	1	ACVR1;
Ossification of the faux cerebri (less common)	1	1	0.374532	72.0198	0.0138846	1	0.439062	1	DMPK;
Osteoglophonic, derived from Greek meaning "hollowed out"	1	1	0.374532	72.0198	0.0138846	1	0.439062	1	FGFR1;
Osteomyelitis	1	2	0.374532	36.1891	0.027577	1	0.707971	1	NTRK1;
Osteopenia	1	28	0.374532	2.59693	0.32414	1	1	1	BRAF;
Other	9	384	3.37079	1.6898	0.0883373	1	1	1	AKT1; AKT2; AR; BRAF; FGFR1; FGFR3; IGF1R; RET; ZAP70;
Otitis media	1	11	0.374532	6.60672	0.142591	1	1	1	BTK;
Oval vertebral bodies (infancy)	1	1	0.374532	72.0198	0.0138846	1	0.439062	1	NPR2;
OVARIAN CANCER	1	6	0.374532	12.1032	0.0804787	1	1	1	AKT1;
Ovarian cancer	1	7	0.374532	10.3766	0.0932498	1	1	1	AKT1;
Ovarian cystadenoma	1	1	0.374532	72.0198	0.0138846	1	0.439062	1	AKT1;
Ovarian cysts	1	3	0.374532	24.1661	0.0410801	1	0.916281	1	STK11;
Ovarian sex cord tumors	1	1	0.374532	72.0198	0.0138846	1	0.439062	1	STK11;
Overgrown long bones	1	1	0.374532	72.0198	0.0138846	1	0.439062	1	AKT1;
Painful swelling in aponeuroses	1	1	0.374532	72.0198	0.0138846	1	0.439062	1	ACVR1;
Painful swelling in fasciae	1	1	0.374532	72.0198	0.0138846	1	0.439062	1	ACVR1;
Painful swellings in tendons	1	1	0.374532	72.0198	0.0138846	1	0.439062	1	ACVR1;
Pain insensitivity, diffuse (including to visceral pain)	1	1	0.374532	72.0198	0.0138846	1	0.439062	1	NTRK1;
Painless testicular mass	3	3	1.1236	72.0198	2.64709e-06	0.0585113	0.00344184	0.0224086	FGFR3; KIT; STK11;
Pale optic nerves	1	3	0.374532	24.1661	0.0410801	1	0.916281	1	AKT3;
Palpitation	1	3	0.374532	24.1661	0.0410801	1	0.916281	1	MYLK2;
PANCREATIC CANCER	1	4	0.374532	18.1397	0.0543964	1	1	1	STK11;
Pancreatic cancer	1	4	0.374532	18.1397	0.0543964	1	1	1	STK11;
Pancreatic carcinoma	1	5	0.374532	14.519	0.0675284	1	1	1	STK11;
Panhypogammaglobulinemia	1	5	0.374532	14.519	0.0675284	1	1	1	BTK;
Panypogammaglobulinemia	1	1	0.374532	72.0198	0.0138846	1	0.439062	1	ZAP70;
Papillomatosis over edematous areas	1	1	0.374532	72.0198	0.0138846	1	0.439062	1	FLT4;
Parainfluenza pneumonitis	1	1	0.374532	72.0198	0.0138846	1	0.439062	1	ZAP70;
Parathyroid adenoma	1	3	0.374532	24.1661	0.0410801	1	0.916281	1	RET;
Parathyroid disease rare	1	1	0.374532	72.0198	0.0138846	1	0.439062	1	RET;
Parathyroid hyperplasia	1	1	0.374532	72.0198	0.0138846	1	0.439062	1	RET;
PARKINSON-DEMENTIA SYNDROME	1	1	0.374532	72.0198	0.0138846	1	0.439062	1	MAPT;
Parkinsonism	3	42	1.1236	5.16019	0.0204004	1	0.637809	1	LRRK2; MAPT; PINK1;
Parotid monomorphic adenoma	1	1	0.374532	72.0198	0.0138846	1	0.439062	1	AKT1;
Partial deficiency of cytoplasmic DHT-binding	1	1	0.374532	72.0198	0.0138846	1	0.439062	1	AR;
Partially reduced visually acuity	1	3	0.374532	24.1661	0.0410801	1	0.916281	1	FGFR3;
Partial syndactyly of fingers and toes	1	2	0.374532	36.1891	0.027577	1	0.707971	1	FGFR1;
Passive-aggressive traits	1	1	0.374532	72.0198	0.0138846	1	0.439062	1	DMPK;
Patellar dislocation	1	3	0.374532	24.1661	0.0410801	1	0.916281	1	LMX1B;
Paternal age effect	1	6	0.374532	12.1032	0.0804787	1	1	1	FGFR3;
Pathology resembles neurofibromas	2	4	0.749064	36.0997	0.00113135	1	0.438724	1	KIT; PDGFRA;
Patients often have other clinical symptoms resulting from dysfunction of the autonomic nervous system	1	6	0.374532	12.1032	0.0804787	1	1	1	RET;
Pectoralis minor aplasia	1	1	0.374532	72.0198	0.0138846	1	0.439062	1	LMX1B;
Pectus carinatum	2	27	0.749064	5.35949	0.0536933	1	1	1	BRAF; RPS6KA3;
Pectus excavatum	5	44	1.87266	8.19857	0.000346731	1	0.191604	1	BRAF; DDR2; IGF1R; RET; RPS6KA3;
Pectus excavatum (31%)	1	1	0.374532	72.0198	0.0138846	1	0.439062	1	ROR2;
Pedunculated nodules on eyelid margins	1	1	0.374532	72.0198	0.0138846	1	0.439062	1	RET;
Peg-shaped incisors	1	4	0.374532	18.1397	0.0543964	1	1	1	FGFR3;
Pelvis	4	153	1.49813	1.88745	0.164122	1	1	1	DDR2; FGFR3; LMX1B; RPS6KA3;
Pentagastrin stimulation test	1	1	0.374532	72.0198	0.0138846	1	0.439062	1	RET;
Periods of apnea	1	6	0.374532	12.1032	0.0804787	1	1	1	RET;
Peripheral axonal neuropathy (uncommon)	1	1	0.374532	72.0198	0.0138846	1	0.439062	1	BRAF;
Peripheral Nervous System	4	178	1.49813	1.62238	0.235005	1	1	1	AR; BRAF; NTRK1; PRKCG;
Peripheral sensory neuropathy, mild	1	1	0.374532	72.0198	0.0138846	1	0.439062	1	AR;
Perseveration	1	4	0.374532	18.1397	0.0543964	1	1	1	MAPT;
Personality changes	1	16	0.374532	4.54341	0.200523	1	1	1	MAPT;
Pes cavus	1	58	0.374532	1.25392	0.556102	1	1	1	RET;
PFEIFFER SYNDROME	1	2	0.374532	36.1891	0.027577	1	0.707971	1	FGFR1;
Phenotypic overlap with frontotemporal dementia (	1	2	0.374532	36.1891	0.027577	1	0.707971	1	MAPT;
Phenotypic similarities to Costello syndrome (	1	1	0.374532	72.0198	0.0138846	1	0.439062	1	BRAF;
Phenotypic similarities to Noonan syndrome (	1	1	0.374532	72.0198	0.0138846	1	0.439062	1	BRAF;
PHEOCHROMOCYTOMA	1	8	0.374532	9.08115	0.105844	1	1	1	RET;
Pheochromocytoma	1	5	0.374532	14.519	0.0675284	1	1	1	RET;
Photophobia	1	29	0.374532	2.50741	0.333537	1	1	1	MAPT;
Pick bodies found in neocortical layers, granule cells of the dentate gyrus, and throughout the hippocampus	1	2	0.374532	36.1891	0.027577	1	0.707971	1	MAPT;
PICK DISEASE OF BRAIN	1	2	0.374532	36.1891	0.027577	1	0.707971	1	MAPT;
Piebaldism	1	2	0.374532	36.1891	0.027577	1	0.707971	1	KIT;
Pigmentary loss in the substantia nigra	1	1	0.374532	72.0198	0.0138846	1	0.439062	1	LRRK2;
Pigmented spots appear in infancy through childhood and fade in adulthood	1	1	0.374532	72.0198	0.0138846	1	0.439062	1	STK11;
Plagiocephaly	1	3	0.374532	24.1661	0.0410801	1	0.916281	1	FGFR3;
Platyspondyly	3	26	1.1236	8.33447	0.0054338	1	0.439062	1	DDR2; FGFR1; FGFR3;
Pneumonia	1	15	0.374532	4.8461	0.189257	1	1	1	BTK;
Pneumonia, particularly pneumocystis carinii	1	1	0.374532	72.0198	0.0138846	1	0.439062	1	ZAP70;
Pneumonia, recurrent episodes	1	1	0.374532	72.0198	0.0138846	1	0.439062	1	DDR2;
Polycoria	1	1	0.374532	72.0198	0.0138846	1	0.439062	1	PITX2;
Polyhydramnios	3	45	1.1236	4.81625	0.0244661	1	0.707971	1	BRAF; ERBB3; FGFR3;
Polyhydramnios (congenital form)	1	1	0.374532	72.0198	0.0138846	1	0.439062	1	DMPK;
Polymicrogyria	1	15	0.374532	4.8461	0.189257	1	1	1	AKT3;
Polyploid sperm heads	1	1	0.374532	72.0198	0.0138846	1	0.439062	1	AURKC;
Poor feeding	2	70	0.749064	2.0677	0.253805	1	1	1	BRAF; RET;
Poor feeding (congenital form)	1	1	0.374532	72.0198	0.0138846	1	0.439062	1	DMPK;
Poor feeding (congenital form form)	1	1	0.374532	72.0198	0.0138846	1	0.439062	1	DMPK;
Poor growth	1	27	0.374532	2.69308	0.31461	1	1	1	IGF1R;
Poor mobility	1	1	0.374532	72.0198	0.0138846	1	0.439062	1	MAPT;
Poor temperature regulation	1	7	0.374532	10.3766	0.0932498	1	1	1	RET;
Positive angle kappa (appearance of exotropia but no shift on cover test)	1	3	0.374532	24.1661	0.0410801	1	0.916281	1	OCA2;
Postaxial polydactyly	1	23	0.374532	3.16123	0.275134	1	1	1	AKT3;
Posterior crossbite	1	2	0.374532	36.1891	0.027577	1	0.707971	1	BRAF;
Posteriorly rotated ears	2	32	0.749064	4.52233	0.0725565	1	1	1	BRAF; ROR2;
Posterior polar cataract	1	1	0.374532	72.0198	0.0138846	1	0.439062	1	EPHA2;
Posterior rib cupping	1	1	0.374532	72.0198	0.0138846	1	0.439062	1	DDR2;
Postural hypotension with compensatory tachycardia	1	1	0.374532	72.0198	0.0138846	1	0.439062	1	NTRK1;
Postural instability	3	14	1.1236	15.4732	0.000860166	1	0.422514	1	CSF1R; LRRK2; MAPT;
Postural instability (63%)	1	1	0.374532	72.0198	0.0138846	1	0.439062	1	PINK1;
Potter facies	1	9	0.374532	8.07325	0.118264	1	1	1	RET;
Preauricular skin tags	1	1	0.374532	72.0198	0.0138846	1	0.439062	1	FGFR1;
Preaxial polydactyly	1	11	0.374532	6.60672	0.142591	1	1	1	FGFR3;
Precocious puberty with Sertoli cell tumor	1	1	0.374532	72.0198	0.0138846	1	0.439062	1	STK11;
Premature delivery	1	9	0.374532	8.07325	0.118264	1	1	1	BRAF;
Prenatal diagnosis by ultrasound	1	3	0.374532	24.1661	0.0410801	1	0.916281	1	FGFR3;
Prenatal Manifestations	6	115	2.24719	3.76349	0.00540527	1	0.439062	1	BRAF; DMPK; ERBB3; FGFR3; FLT4; RET;
Present but small tonsils	1	1	0.374532	72.0198	0.0138846	1	0.439062	1	BTK;
Presents with inguinal hernia (prepubertal) or primary amenorrhea (post pubertal)	1	1	0.374532	72.0198	0.0138846	1	0.439062	1	AR;
Presystolic gallop	1	3	0.374532	24.1661	0.0410801	1	0.916281	1	MYLK2;
Pretibial dimples	1	1	0.374532	72.0198	0.0138846	1	0.439062	1	FGFR1;
Prevalence of 1 in 10,000 African-Americans	1	2	0.374532	36.1891	0.027577	1	0.707971	1	OCA2;
Prevalence of 1 in 10,000 Caucasians	1	2	0.374532	36.1891	0.027577	1	0.707971	1	OCA2;
Prevalence of 1 in 1,429 in Tanzania	1	2	0.374532	36.1891	0.027577	1	0.707971	1	OCA2;
Prevalence of 1 in 227 Hopi Indians	1	2	0.374532	36.1891	0.027577	1	0.707971	1	OCA2;
Prevalence of 1 in 240 Zuni Indians	1	2	0.374532	36.1891	0.027577	1	0.707971	1	OCA2;
Prevalence of 1 in 2,833 in Zimbabwe	1	2	0.374532	36.1891	0.027577	1	0.707971	1	OCA2;
Prevalence of 1 in 3,900 in South Africa	1	2	0.374532	36.1891	0.027577	1	0.707971	1	OCA2;
Prevalence of 1 in 40,000	1	2	0.374532	36.1891	0.027577	1	0.707971	1	AR;
Prevalence of 1 in 7,900 in Cameroon	1	2	0.374532	36.1891	0.027577	1	0.707971	1	OCA2;
Prevalence of in 1 in 8,000	1	1	0.374532	72.0198	0.0138846	1	0.439062	1	DMPK;
Primitive reflexes (palmomental, snout, glabellar)	1	2	0.374532	36.1891	0.027577	1	0.707971	1	MAPT;
Profound mental retardation and hypotonia in survivors	1	1	0.374532	72.0198	0.0138846	1	0.439062	1	FGFR3;
Prognathism	1	18	0.374532	4.03887	0.222588	1	1	1	FGFR1;
Progressive calcification of costochondral cartilage	1	1	0.374532	72.0198	0.0138846	1	0.439062	1	DDR2;
Progressive cerebellar ataxia	1	5	0.374532	14.519	0.0675284	1	1	1	PRKCG;
Progressive cervical vertebral spine fusion	1	1	0.374532	72.0198	0.0138846	1	0.439062	1	ACVR1;
Progressive disorder	2	69	0.749064	2.09766	0.248655	1	1	1	AKT1; MAPT;
Progressive ectopic ossification (neck, dorsal trunk, proximal limbs, sternocleidomastoid, masseters)	1	1	0.374532	72.0198	0.0138846	1	0.439062	1	ACVR1;
Progressive ectopic ossification of tendons and ligaments	1	1	0.374532	72.0198	0.0138846	1	0.439062	1	ACVR1;
Progressive interpediculate narrowing in lumbar spine	1	1	0.374532	72.0198	0.0138846	1	0.439062	1	FGFR3;
Progressive narrowing of interpediculate distance in the lumbar vertebrate	1	1	0.374532	72.0198	0.0138846	1	0.439062	1	FGFR3;
Progressive rib expansion	1	1	0.374532	72.0198	0.0138846	1	0.439062	1	FGFR1;
Progressive shortening of humerus in first year	1	1	0.374532	72.0198	0.0138846	1	0.439062	1	NPR2;
Progressive shortening of radius in first year	1	1	0.374532	72.0198	0.0138846	1	0.439062	1	NPR2;
Progressive shortening of ulna in first year	1	1	0.374532	72.0198	0.0138846	1	0.439062	1	NPR2;
Prominent brow	1	2	0.374532	36.1891	0.027577	1	0.707971	1	RPS6KA3;
Prominent chin	1	5	0.374532	14.519	0.0675284	1	1	1	RPS6KA3;
Prominent ears	1	16	0.374532	4.54341	0.200523	1	1	1	RPS6KA3;
Prominent eyes	1	19	0.374532	3.82641	0.233393	1	1	1	DDR2;
Prominent eyes (14%)	1	1	0.374532	72.0198	0.0138846	1	0.439062	1	ROR2;
Prominent forehead	2	36	0.749064	4.01999	0.0889378	1	1	1	BRAF; NPR2;
Prominent philtral groove	1	3	0.374532	24.1661	0.0410801	1	0.916281	1	AKT3;
Prominent philtrum	1	6	0.374532	12.1032	0.0804787	1	1	1	BRAF;
Prominent Schwalbe line (posterior embryotoxon)	1	1	0.374532	72.0198	0.0138846	1	0.439062	1	PITX2;
Prominent supraorbital ridges	1	9	0.374532	8.07325	0.118264	1	1	1	PITX2;
Proptosis	1	9	0.374532	8.07325	0.118264	1	1	1	FGFR1;
PROSTATE CANCER	1	12	0.374532	6.05662	0.154503	1	1	1	AR;
Prostatitis	1	1	0.374532	72.0198	0.0138846	1	0.439062	1	BTK;
Proteinuria	2	48	0.749064	3.0152	0.143275	1	1	1	LMX1B; RET;
PROTEUS SYNDROME	1	1	0.374532	72.0198	0.0138846	1	0.439062	1	AKT1;
Proximal medial tibial osteochondromas	1	1	0.374532	72.0198	0.0138846	1	0.439062	1	ACVR1;
Proximal weakness occurs first	1	1	0.374532	72.0198	0.0138846	1	0.439062	1	AR;
Pseudoarthroses	1	1	0.374532	72.0198	0.0138846	1	0.439062	1	FGFR1;
Psychiatric disturbances (25%)	1	1	0.374532	72.0198	0.0138846	1	0.439062	1	PINK1;
Ptosis	4	107	1.49813	2.69881	0.0620193	1	1	1	AKT1; BRAF; FGFR3; LMX1B;
Pulmonic stenosis	1	7	0.374532	10.3766	0.0932498	1	1	1	BRAF;
Pyoderma	1	1	0.374532	72.0198	0.0138846	1	0.439062	1	BTK;
Quadriceps aplasia	1	1	0.374532	72.0198	0.0138846	1	0.439062	1	LMX1B;
Radiohumeral synostosis of elbow	1	2	0.374532	36.1891	0.027577	1	0.707971	1	FGFR1;
Rapidly progressive	1	9	0.374532	8.07325	0.118264	1	1	1	CSF1R;
Rare Hirschsprung disease	1	2	0.374532	36.1891	0.027577	1	0.707971	1	KIT;
Receding chin	1	3	0.374532	24.1661	0.0410801	1	0.916281	1	RET;
Receding hairline	1	1	0.374532	72.0198	0.0138846	1	0.439062	1	IGF1R;
Rectal prolapse	2	7	0.749064	20.6505	0.00385192	1	0.439062	1	RPS6KA3; STK11;
Recurrent colicky abdominal pain	1	1	0.374532	72.0198	0.0138846	1	0.439062	1	STK11;
Recurrent corneal ulcerations	1	3	0.374532	24.1661	0.0410801	1	0.916281	1	FGFR3;
Recurrent intestinal pseudoobstruction	1	1	0.374532	72.0198	0.0138846	1	0.439062	1	DMPK;
Recurrent otitis media in infancy and childhood	1	1	0.374532	72.0198	0.0138846	1	0.439062	1	FGFR3;
Reduced B cell function	1	1	0.374532	72.0198	0.0138846	1	0.439062	1	ZAP70;
Reduced consciousness, hypoglycemia-related	1	1	0.374532	72.0198	0.0138846	1	0.439062	1	AKT2;
Reduced fetal movements (congenital form)	1	1	0.374532	72.0198	0.0138846	1	0.439062	1	DMPK;
Reduced penetrance, estimated to be 15% at 60 years, 21% at 70 years, and 32% at 80 years	1	1	0.374532	72.0198	0.0138846	1	0.439062	1	LRRK2;
Reduced sleep latency	1	1	0.374532	72.0198	0.0138846	1	0.439062	1	DMPK;
Reduction deficits of halluces (in some patients)	1	1	0.374532	72.0198	0.0138846	1	0.439062	1	ACVR1;
Reduction deficits of thumbs (in some patients)	1	1	0.374532	72.0198	0.0138846	1	0.439062	1	ACVR1;
Relatively benign course	1	1	0.374532	72.0198	0.0138846	1	0.439062	1	LRRK2;
Renal adysplasia	1	3	0.374532	24.1661	0.0410801	1	0.916281	1	RET;
Renal agenesis	2	14	0.749064	10.3326	0.0156564	1	0.492977	1	FGFR3; RET;
Renal artery stenosis	1	9	0.374532	8.07325	0.118264	1	1	1	RET;
Renal duplication (10%)	1	1	0.374532	72.0198	0.0138846	1	0.439062	1	ROR2;
Renal dysplasia	1	10	0.374532	7.26673	0.130513	1	1	1	RET;
Renal failure	1	37	0.374532	1.96542	0.40418	1	1	1	LMX1B;
Respiratory	10	360	3.74532	2.0025	0.0294299	1	0.753787	1	ACVR1; AKT1; BTK; DDR2; ERBB3; FGFR1; FGFR3; RET; STK11; ZAP70;
Respiratory distress	1	13	0.374532	5.59108	0.16625	1	1	1	FGFR1;
Respiratory distress (congenital form)	1	1	0.374532	72.0198	0.0138846	1	0.439062	1	DMPK;
Respiratory failure	1	42	0.374532	1.73149	0.44449	1	1	1	ACVR1;
Respiratory failure in infancy	1	1	0.374532	72.0198	0.0138846	1	0.439062	1	ERBB3;
Respiratory insufficiency	2	35	0.749064	4.13481	0.0847457	1	1	1	ERBB3; FGFR3;
Respiratory insufficiency/failure	1	1	0.374532	72.0198	0.0138846	1	0.439062	1	FGFR3;
Resting tremor	3	10	1.1236	21.6563	0.00029549	1	0.176527	1	LRRK2; MAPT; PINK1;
Restricted arm mobility	1	1	0.374532	72.0198	0.0138846	1	0.439062	1	ACVR1;
Restrictive lung disease	1	9	0.374532	8.07325	0.118264	1	1	1	DDR2;
Restrictive pulmonary disease	1	1	0.374532	72.0198	0.0138846	1	0.439062	1	ACVR1;
Retarded bone age	1	1	0.374532	72.0198	0.0138846	1	0.439062	1	BTK;
Retrocollis	1	1	0.374532	72.0198	0.0138846	1	0.439062	1	MAPT;
Retrognathia (37%)	1	1	0.374532	72.0198	0.0138846	1	0.439062	1	ROR2;
Rhizomelic dwarfism	1	2	0.374532	36.1891	0.027577	1	0.707971	1	FGFR1;
Rhizomelic shortening	1	8	0.374532	9.08115	0.105844	1	1	1	FGFR3;
Rib fusion (100%)	1	1	0.374532	72.0198	0.0138846	1	0.439062	1	ROR2;
Ribs, Sternum, Clavicles and Scapulae	8	162	2.99625	3.56076	0.00195437	1	0.439062	1	DDR2; FGFR1; FGFR3; LMX1B; NPR2; RET; ROR2; RPS6KA3;
Right ventricular outlet obstruction	1	2	0.374532	36.1891	0.027577	1	0.707971	1	ROR2;
Rigidity	4	28	1.49813	10.3106	0.000572212	1	0.294144	1	CSF1R; LRRK2; MAPT; PINK1;
Risk factors for development of TGCT - family history, cryptorchidism (	3	3	1.1236	72.0198	2.64709e-06	0.0585113	0.00344184	0.0224086	FGFR3; KIT; STK11;
Rudimentary adenoids	1	1	0.374532	72.0198	0.0138846	1	0.439062	1	BTK;
Rudimentary tonsils	1	1	0.374532	72.0198	0.0138846	1	0.439062	1	BTK;
Saccadic intrusions	1	1	0.374532	72.0198	0.0138846	1	0.439062	1	PRKCG;
Schizophrenia	1	15	0.374532	4.8461	0.189257	1	1	1	AKT1;
Scoliosis	5	118	1.87266	3.05753	0.0244865	1	0.707971	1	ACVR1; DDR2; LMX1B; RET; RPS6KA3;
Scoliosis (77%)	1	1	0.374532	72.0198	0.0138846	1	0.439062	1	ROR2;
S-curved lower eyelids	1	1	0.374532	72.0198	0.0138846	1	0.439062	1	FGFR1;
Secondary motor complications develop in 50% of those on levodopa therapy	1	1	0.374532	72.0198	0.0138846	1	0.439062	1	LRRK2;
Secondary myopathic features	1	1	0.374532	72.0198	0.0138846	1	0.439062	1	AR;
See also autosomal dominant Robinow syndrome (	1	1	0.374532	72.0198	0.0138846	1	0.439062	1	ROR2;
See also autosomal form,	1	2	0.374532	36.1891	0.027577	1	0.707971	1	AR;
See also OCA1A (	1	2	0.374532	36.1891	0.027577	1	0.707971	1	OCA2;
Seizures	3	275	1.1236	0.788261	0.738161	1	1	1	AKT3; BRAF; RPS6KA3;
Seizures, hypoglycemic	1	5	0.374532	14.519	0.0675284	1	1	1	AKT2;
Seminoma	3	3	1.1236	72.0198	2.64709e-06	0.0585113	0.00344184	0.0224086	FGFR3; KIT; STK11;
Seminomas	1	1	0.374532	72.0198	0.0138846	1	0.439062	1	AR;
Sensorineural hearing loss	3	23	1.1236	9.42111	0.00381632	1	0.439062	1	ACVR1; LMX1B; RPS6KA3;
Septic arthritis	1	1	0.374532	72.0198	0.0138846	1	0.439062	1	BTK;
Sertoli cell adenomas	1	1	0.374532	72.0198	0.0138846	1	0.439062	1	AR;
Sertoli cell testicular tumors	1	1	0.374532	72.0198	0.0138846	1	0.439062	1	STK11;
Severe atopic dermatitis	1	1	0.374532	72.0198	0.0138846	1	0.439062	1	BRAF;
Severe cloverleaf skull (Kleeblattschaedel)	1	1	0.374532	72.0198	0.0138846	1	0.439062	1	FGFR3;
Severe enteroviral infections	1	1	0.374532	72.0198	0.0138846	1	0.439062	1	BTK;
Severe growth deficiency in survivors	1	1	0.374532	72.0198	0.0138846	1	0.439062	1	FGFR3;
Severe mental retardation (congenital form)	1	1	0.374532	72.0198	0.0138846	1	0.439062	1	DMPK;
Severe platyspondyly	1	2	0.374532	36.1891	0.027577	1	0.707971	1	FGFR3;
Severity of nail involvement worse radial to ulnar side	1	1	0.374532	72.0198	0.0138846	1	0.439062	1	LMX1B;
Shallow breathing (decreased tidal volume)	1	6	0.374532	12.1032	0.0804787	1	1	1	RET;
Shallow orbital ridges	1	1	0.374532	72.0198	0.0138846	1	0.439062	1	BRAF;
Shallow orbits	1	8	0.374532	9.08115	0.105844	1	1	1	FGFR1;
Short and small iliac bones	1	1	0.374532	72.0198	0.0138846	1	0.439062	1	FGFR3;
Short bifid sternum	1	1	0.374532	72.0198	0.0138846	1	0.439062	1	RPS6KA3;
Short, bowed limbs	1	1	0.374532	72.0198	0.0138846	1	0.439062	1	FGFR1;
Short, broad feet	1	3	0.374532	24.1661	0.0410801	1	0.916281	1	FGFR1;
Short, broad fingers	1	1	0.374532	72.0198	0.0138846	1	0.439062	1	NPR2;
Short, broad hands	1	4	0.374532	18.1397	0.0543964	1	1	1	FGFR1;
Short, broad metacarpals	1	1	0.374532	72.0198	0.0138846	1	0.439062	1	FGFR1;
Short, broad metacarpals (progressive shortening in first year)	1	1	0.374532	72.0198	0.0138846	1	0.439062	1	NPR2;
Short, broad metatarsal	1	2	0.374532	36.1891	0.027577	1	0.707971	1	FGFR1;
Short, broad metatarsals	2	2	0.749064	72.0198	0.000192069	1	0.128651	0.837604	FGFR1; NPR2;
Short, broad phalanges	2	2	0.749064	72.0198	0.000192069	1	0.128651	0.837604	FGFR1; NPR2;
Short, broad phalanges (progressive shortening in first year)	1	1	0.374532	72.0198	0.0138846	1	0.439062	1	NPR2;
Short, broad tubular bones	1	1	0.374532	72.0198	0.0138846	1	0.439062	1	DDR2;
Shortened limbs	1	1	0.374532	72.0198	0.0138846	1	0.439062	1	FGFR3;
Short femoral neck	1	5	0.374532	14.519	0.0675284	1	1	1	FGFR3;
Short fingers	1	9	0.374532	8.07325	0.118264	1	1	1	DDR2;
Short first metacarpal	1	4	0.374532	18.1397	0.0543964	1	1	1	ACVR1;
Short hallux	1	1	0.374532	72.0198	0.0138846	1	0.439062	1	ACVR1;
Short ischia	1	2	0.374532	36.1891	0.027577	1	0.707971	1	DDR2;
Short-limb dwarfism identifiable at birth	1	4	0.374532	18.1397	0.0543964	1	1	1	FGFR3;
Short-limb dwarfism identifiable during childhood	1	2	0.374532	36.1891	0.027577	1	0.707971	1	FGFR3;
Short limbs	1	4	0.374532	18.1397	0.0543964	1	1	1	DDR2;
Short limbs become more apparent during childhood	1	1	0.374532	72.0198	0.0138846	1	0.439062	1	NPR2;
Short metacarpals	1	17	0.374532	4.27631	0.211633	1	1	1	RPS6KA3;
Short middle phalanges	1	2	0.374532	36.1891	0.027577	1	0.707971	1	FGFR3;
Short nails	1	6	0.374532	12.1032	0.0804787	1	1	1	NPR2;
Short neck (31%)	1	1	0.374532	72.0198	0.0138846	1	0.439062	1	ROR2;
Short neck	1	63	0.374532	1.15442	0.586166	1	1	1	FGFR1;
Short nose	3	26	1.1236	8.33447	0.0054338	1	0.439062	1	DDR2; FGFR1; NPR2;
Short philtrum	1	16	0.374532	4.54341	0.200523	1	1	1	PITX2;
Short radius	1	5	0.374532	14.519	0.0675284	1	1	1	FGFR3;
Short ribs	2	9	0.749064	16.0666	0.00648326	1	0.439062	1	DDR2; FGFR3;
Short sciatic notch	1	1	0.374532	72.0198	0.0138846	1	0.439062	1	DDR2;
Short, squared ilia	1	1	0.374532	72.0198	0.0138846	1	0.439062	1	FGFR3;
Short stature	5	172	1.87266	2.09766	0.0920764	1	1	1	BTK; FGFR1; IGF1R; LMX1B; RPS6KA3;
Short stature, disproportionate	1	9	0.374532	8.07325	0.118264	1	1	1	NPR2;
Short stature, postnatal	1	2	0.374532	36.1891	0.027577	1	0.707971	1	BRAF;
Short stature (postnatal onset) (97%)	1	1	0.374532	72.0198	0.0138846	1	0.439062	1	ROR2;
Short thumb	1	1	0.374532	72.0198	0.0138846	1	0.439062	1	ACVR1;
Short toes	1	8	0.374532	9.08115	0.105844	1	1	1	NPR2;
Short tubular bones	1	4	0.374532	18.1397	0.0543964	1	1	1	NPR2;
Short tubular bones with mild metaphyseal flare	1	1	0.374532	72.0198	0.0138846	1	0.439062	1	FGFR3;
Short ulna	1	5	0.374532	14.519	0.0675284	1	1	1	FGFR3;
Short upturned nose	1	1	0.374532	72.0198	0.0138846	1	0.439062	1	BRAF;
Short, upturned nose (95%)	1	1	0.374532	72.0198	0.0138846	1	0.439062	1	ROR2;
Short, wide metacarpals (wider distally than proximally)	1	1	0.374532	72.0198	0.0138846	1	0.439062	1	DDR2;
Short, wide phalanges	1	1	0.374532	72.0198	0.0138846	1	0.439062	1	DDR2;
Shuffling gait	2	8	0.749064	18.0724	0.00508898	1	0.439062	1	CSF1R; MAPT;
Significant phenotypic variability	1	2	0.374532	36.1891	0.027577	1	0.707971	1	FGFR3;
Simple, cup-shaped ears	1	3	0.374532	24.1661	0.0410801	1	0.916281	1	FGFR3;
Sinusitis	1	8	0.374532	9.08115	0.105844	1	1	1	BTK;
Skel	1	46	0.374532	1.58096	0.474773	1	1	1	MAPT;
Skeletal	19	634	7.1161	2.15942	0.00144363	1	0.439062	1	ACVR1; AKT1; AKT3; BRAF; BTK; DDR2; ERBB3; FGFR1; FGFR3; IGF1R; KIT; LMX1B; NPR2; NTRK1; PDGFRA; RET; ROR2; RPS6KA3; STK11;
Skin	17	539	6.36704	2.27279	0.00148869	1	0.439062	1	AKT1; BRAF; BTK; FGFR1; FGFR3; FLT4; KIT; NPR2; NTRK1; OCA2; PDGFRA; RET; ROR2; RPS6KA3; STK11; TGFBR1; ZAP70;
Skin Histology	2	53	0.749064	2.7308	0.167571	1	1	1	AKT1; TGFBR1;
Skin, Nails, Hair	21	554	7.86517	2.73124	3.35107e-05	0.740721	0.0389853	0.25382	ACVR1; AKT1; AR; BRAF; BTK; DMPK; FGFR1; FGFR3; FLT4; KIT; LMX1B; NPR2; NTRK1; OCA2; PDGFRA; RET; ROR2; RPS6KA3; STK11; TGFBR1; ZAP70;
Skin ulcers	1	1	0.374532	72.0198	0.0138846	1	0.439062	1	NTRK1;
Skull	5	148	1.87266	2.4378	0.0557376	1	1	1	ACVR1; DDR2; FGFR1; FGFR3; RPS6KA3;
Sleep benefit (31%)	1	1	0.374532	72.0198	0.0138846	1	0.439062	1	PINK1;
Sleep disturbances	1	10	0.374532	7.26673	0.130513	1	1	1	MAPT;
Sleep-onset REM	1	1	0.374532	72.0198	0.0138846	1	0.439062	1	DMPK;
Slipped capital femoral epiphyses	1	2	0.374532	36.1891	0.027577	1	0.707971	1	RET;
Slow-growing hair	1	3	0.374532	24.1661	0.0410801	1	0.916281	1	BRAF;
Slow nail growth	1	1	0.374532	72.0198	0.0138846	1	0.439062	1	LMX1B;
Slow progression	4	18	1.49813	16.0355	9.53812e-05	1	0.0843322	0.549058	AR; LRRK2; PINK1; PRKCG;
Small abnormally formed scapula	1	1	0.374532	72.0198	0.0138846	1	0.439062	1	FGFR3;
Small abnormally formed scapulae	1	1	0.374532	72.0198	0.0138846	1	0.439062	1	FGFR3;
Small birth length	1	3	0.374532	24.1661	0.0410801	1	0.916281	1	AKT3;
Small cavum septum	1	3	0.374532	24.1661	0.0410801	1	0.916281	1	AKT3;
Small cervical vertebral bodies	1	1	0.374532	72.0198	0.0138846	1	0.439062	1	ACVR1;
Small chest	1	4	0.374532	18.1397	0.0543964	1	1	1	DDR2;
Small clitoris (80%)	1	1	0.374532	72.0198	0.0138846	1	0.439062	1	ROR2;
Small face	1	5	0.374532	14.519	0.0675284	1	1	1	FGFR3;
Small fingernails	1	1	0.374532	72.0198	0.0138846	1	0.439062	1	RPS6KA3;
Small, firm, rubbery, flesh-colored nodules most commonly found on the head, neck, and trunk	1	1	0.374532	72.0198	0.0138846	1	0.439062	1	PDGFRB;
Small foramen magnum	1	1	0.374532	72.0198	0.0138846	1	0.439062	1	FGFR3;
Small hands (84%)	1	1	0.374532	72.0198	0.0138846	1	0.439062	1	ROR2;
Small labia majora (40%)	1	1	0.374532	72.0198	0.0138846	1	0.439062	1	ROR2;
Small labia minora (81%)	1	1	0.374532	72.0198	0.0138846	1	0.439062	1	ROR2;
Small lymph nodes	1	2	0.374532	36.1891	0.027577	1	0.707971	1	BTK;
Small-normal birth length	1	1	0.374532	72.0198	0.0138846	1	0.439062	1	NPR2;
Small nose	1	12	0.374532	6.05662	0.154503	1	1	1	FGFR1;
Small penis (100%)	1	1	0.374532	72.0198	0.0138846	1	0.439062	1	ROR2;
Small sacroiliac notches	1	1	0.374532	72.0198	0.0138846	1	0.439062	1	FGFR3;
Small scapulae	1	2	0.374532	36.1891	0.027577	1	0.707971	1	FGFR1;
Social and occupational deterioration	1	14	0.374532	5.19201	0.177834	1	1	1	AKT1;
Solitary disease is more common in males	1	1	0.374532	72.0198	0.0138846	1	0.439062	1	PDGFRB;
Somatic mutation	2	30	0.749064	4.82372	0.0647794	1	1	1	AKT1; ERBB2;
Some patients have later onset of the disorder as young adults	1	6	0.374532	12.1032	0.0804787	1	1	1	RET;
Spade-like hands	1	3	0.374532	24.1661	0.0410801	1	0.916281	1	RET;
Sparse, curly hair	1	1	0.374532	72.0198	0.0138846	1	0.439062	1	BRAF;
Sparse to absent axillary hair	1	1	0.374532	72.0198	0.0138846	1	0.439062	1	AR;
Sparse to absent pubic hair	1	1	0.374532	72.0198	0.0138846	1	0.439062	1	AR;
Spasticity	1	103	0.374532	0.706145	0.764016	1	1	1	CSF1R;
Speech delay	2	41	0.749064	3.52987	0.110753	1	1	1	FGFR1; IGF1R;
Speech disability	1	1	0.374532	72.0198	0.0138846	1	0.439062	1	DMPK;
Spheroids contain neurofilaments	1	1	0.374532	72.0198	0.0138846	1	0.439062	1	CSF1R;
Spina bifida	1	9	0.374532	8.07325	0.118264	1	1	1	LMX1B;
Spinal cord compression	1	8	0.374532	9.08115	0.105844	1	1	1	DDR2;
Spinal cord glial hyperplasia	1	1	0.374532	72.0198	0.0138846	1	0.439062	1	ERBB3;
Spinal stenosis from angular kyphoscoliosis	1	1	0.374532	72.0198	0.0138846	1	0.439062	1	AKT1;
Spine	11	286	4.11985	2.77241	0.00227336	1	0.439062	1	ACVR1; AKT1; AKT3; DDR2; FGFR1; FGFR3; LMX1B; NPR2; RET; ROR2; RPS6KA3;
Spleen	3	109	1.1236	1.98862	0.193301	1	1	1	AKT1; BRAF; ZAP70;
Splenomegaly	3	84	1.1236	2.5804	0.111652	1	1	1	AKT1; BRAF; ZAP70;
Spondyloepimetaphyseal dysplasia	1	4	0.374532	18.1397	0.0543964	1	1	1	DDR2;
SPONDYLOMETAEPIPHYSEAL DYSPLASIA, SHORT LIMB-HAND TYPE	1	1	0.374532	72.0198	0.0138846	1	0.439062	1	DDR2;
Spontaneous resorption (rare)	1	1	0.374532	72.0198	0.0138846	1	0.439062	1	FLT4;
Sporadic occurrence	1	1	0.374532	72.0198	0.0138846	1	0.439062	1	AKT1;
Spots occur in 95% of patients but can be absent	1	1	0.374532	72.0198	0.0138846	1	0.439062	1	STK11;
Squamous epitheliomas, multiple	1	1	0.374532	72.0198	0.0138846	1	0.439062	1	TGFBR1;
S-scoliosis of thoracic spine	1	3	0.374532	24.1661	0.0410801	1	0.916281	1	AKT3;
Stereotyped behavior	1	4	0.374532	18.1397	0.0543964	1	1	1	MAPT;
Strabismus	4	128	1.49813	2.25607	0.103066	1	1	1	BRAF; FGFR1; OCA2; PITX2;
Straight, coarse hair	1	1	0.374532	72.0198	0.0138846	1	0.439062	1	RPS6KA3;
Straight femurs	1	1	0.374532	72.0198	0.0138846	1	0.439062	1	FGFR3;
Stroke	1	10	0.374532	7.26673	0.130513	1	1	1	PRKCH;
STROKE, ISCHEMIC	1	5	0.374532	14.519	0.0675284	1	1	1	PRKCH;
Subaortic stenosis	1	4	0.374532	18.1397	0.0543964	1	1	1	MYLK2;
Subcortical white matter lesions in the temporal lobes seen on brain MRI	1	1	0.374532	72.0198	0.0138846	1	0.439062	1	DMPK;
Subependymomas	1	3	0.374532	24.1661	0.0410801	1	0.916281	1	ERBB2;
Submucous cleft palate	1	5	0.374532	14.519	0.0675284	1	1	1	BRAF;
Submucous cleft palate (rare)	1	3	0.374532	24.1661	0.0410801	1	0.916281	1	AKT3;
Sudden death	1	9	0.374532	8.07325	0.118264	1	1	1	MYLK2;
Superiorly curved clavicles	1	1	0.374532	72.0198	0.0138846	1	0.439062	1	NPR2;
Supranuclear gaze palsy	1	3	0.374532	24.1661	0.0410801	1	0.916281	1	MAPT;
Susceptibility conferred by mutation in the homolog of the S. pombe checkpoint kinase 2 gene (CHEK2,	1	23	0.374532	3.16123	0.275134	1	1	1	AKT1;
Susceptibility conferred by mutation in the transforming growth factor-beta receptor, type I gene (TGFBR1,	1	1	0.374532	72.0198	0.0138846	1	0.439062	1	TGFBR1;
Susceptibility conferred by mutation in the tumor protein p53 gene (TP53,	1	3	0.374532	24.1661	0.0410801	1	0.916281	1	ERBB2;
Susceptibility to infections start in the first year of life	1	1	0.374532	72.0198	0.0138846	1	0.439062	1	BTK;
Susceptibility to infections starts in the first week of life	1	1	0.374532	72.0198	0.0138846	1	0.439062	1	BTK;
Susceptibility to rage in 50% of patients	1	1	0.374532	72.0198	0.0138846	1	0.439062	1	NTRK1;
Sweating	1	8	0.374532	9.08115	0.105844	1	1	1	RET;
Swollen achromatic cells (Pick cells)	1	2	0.374532	36.1891	0.027577	1	0.707971	1	MAPT;
Symphalangism	1	2	0.374532	36.1891	0.027577	1	0.707971	1	ROR2;
Symptoms must occur for 6 months including 1 month of characteristic symptoms (e.g. delusions) to make diagnosis	1	14	0.374532	5.19201	0.177834	1	1	1	AKT1;
Syndactyly, 2-3, 3-4 toe	1	3	0.374532	24.1661	0.0410801	1	0.916281	1	FGFR3;
Syndactyly, 2-3 finger	1	3	0.374532	24.1661	0.0410801	1	0.916281	1	FGFR3;
Syndactyly	1	47	0.374532	1.54733	0.482083	1	1	1	ROR2;
Synophrys, mild	1	1	0.374532	72.0198	0.0138846	1	0.439062	1	FGFR1;
Syringomyelia	1	2	0.374532	36.1891	0.027577	1	0.707971	1	DDR2;
Systemic mastocytosis may affect bone, GI tract, lymphatics, spleen, and liver	1	1	0.374532	72.0198	0.0138846	1	0.439062	1	KIT;
Tachycardia	1	15	0.374532	4.8461	0.189257	1	1	1	RET;
Talipes equinovarus	2	49	0.749064	2.95368	0.148073	1	1	1	LMX1B; RET;
Tall for females (mean height 171.5cm)	1	1	0.374532	72.0198	0.0138846	1	0.439062	1	AR;
Tapering fingers	1	4	0.374532	18.1397	0.0543964	1	1	1	RPS6KA3;
Tarsonavicular and calcaneonavicular fusion	1	2	0.374532	36.1891	0.027577	1	0.707971	1	FGFR1;
Tau-immunoreactive inclusions in neurons and astrocytes	1	1	0.374532	72.0198	0.0138846	1	0.439062	1	MAPT;
Tau inclusions are 'flame-shaped' or 'tuft-like'	1	1	0.374532	72.0198	0.0138846	1	0.439062	1	MAPT;
Tau-positive inclusions may be found	1	2	0.374532	36.1891	0.027577	1	0.707971	1	MAPT;
Teeth	7	228	2.62172	2.2142	0.040417	1	0.916281	1	ACVR1; BRAF; FGFR1; FGFR3; PITX2; ROR2; RPS6KA3;
Telecanthus	1	17	0.374532	4.27631	0.211633	1	1	1	FGFR3;
Temperature insensitivity, diffuse	1	1	0.374532	72.0198	0.0138846	1	0.439062	1	NTRK1;
Temporal lobe heterotopias	1	1	0.374532	72.0198	0.0138846	1	0.439062	1	FGFR3;
Tent-shaped mouth	1	4	0.374532	18.1397	0.0543964	1	1	1	AKT3;
Testicular atrophy	2	6	0.749064	24.0865	0.00277677	1	0.439062	1	AR; DMPK;
Testis biopsy shows Leydig cell hyperplasia, hyaline tubular ghosts, and mitotic germ cells but no spermatozoa	1	1	0.374532	72.0198	0.0138846	1	0.439062	1	AR;
Thenar muscle hypoplasia	1	3	0.374532	24.1661	0.0410801	1	0.916281	1	FGFR3;
Thick alae nasi	1	2	0.374532	36.1891	0.027577	1	0.707971	1	RPS6KA3;
Thick, calloused skin	1	1	0.374532	72.0198	0.0138846	1	0.439062	1	NTRK1;
Thick calvarium	1	2	0.374532	36.1891	0.027577	1	0.707971	1	RPS6KA3;
Thick corpus callosum	1	4	0.374532	18.1397	0.0543964	1	1	1	AKT3;
Thickened, anteverted eyelid	1	1	0.374532	72.0198	0.0138846	1	0.439062	1	RET;
Thickening of the lateral border of the scapula	1	1	0.374532	72.0198	0.0138846	1	0.439062	1	LMX1B;
Thickening of the skull (less common)	1	1	0.374532	72.0198	0.0138846	1	0.439062	1	DMPK;
Thick, everted lower lip	1	2	0.374532	36.1891	0.027577	1	0.707971	1	RPS6KA3;
Thick lips	1	14	0.374532	5.19201	0.177834	1	1	1	RET;
Thick nasal septum	1	1	0.374532	72.0198	0.0138846	1	0.439062	1	RPS6KA3;
Thin cortices	1	2	0.374532	36.1891	0.027577	1	0.707971	1	AKT1;
Thin upper lip	2	25	0.749064	5.78808	0.0467235	1	1	1	IGF1R; PITX2;
Thin upper lip (29%)	1	1	0.374532	72.0198	0.0138846	1	0.439062	1	ROR2;
Thoracic hemivertebrae (98%)	1	1	0.374532	72.0198	0.0138846	1	0.439062	1	ROR2;
Thoracolumbar scoliosis	1	3	0.374532	24.1661	0.0410801	1	0.916281	1	ROR2;
Thyroid cancer	1	2	0.374532	36.1891	0.027577	1	0.707971	1	STK11;
Toenails involved in 1/7 individuals	1	1	0.374532	72.0198	0.0138846	1	0.439062	1	LMX1B;
Tone does not appreciably change with age	1	2	0.374532	36.1891	0.027577	1	0.707971	1	OCA2;
Tongue thrusting	1	1	0.374532	72.0198	0.0138846	1	0.439062	1	BRAF;
Trachea calcifications	1	1	0.374532	72.0198	0.0138846	1	0.439062	1	DDR2;
Transitional cell bladder carcinoma	1	5	0.374532	14.519	0.0675284	1	1	1	FGFR3;
Translucent irides	1	2	0.374532	36.1891	0.027577	1	0.707971	1	OCA2;
Transverse palmar creases	1	8	0.374532	9.08115	0.105844	1	1	1	RPS6KA3;
Trauma, IM injection, surgery can be foci of ectopic ossification	1	1	0.374532	72.0198	0.0138846	1	0.439062	1	ACVR1;
Tremor (30%)	1	1	0.374532	72.0198	0.0138846	1	0.439062	1	MAPT;
Tremor	1	33	0.374532	2.20357	0.369844	1	1	1	AR;
Triangular mouth (86%)	1	1	0.374532	72.0198	0.0138846	1	0.439062	1	ROR2;
Triangular shaped distal phalanges	1	1	0.374532	72.0198	0.0138846	1	0.439062	1	DDR2;
Triceps aplasia	1	1	0.374532	72.0198	0.0138846	1	0.439062	1	LMX1B;
Trident hand	1	1	0.374532	72.0198	0.0138846	1	0.439062	1	FGFR3;
Trigonocephaly	1	6	0.374532	12.1032	0.0804787	1	1	1	FGFR1;
Triphalangeal thumb	1	8	0.374532	9.08115	0.105844	1	1	1	FGFR3;
Truncal obesity	1	4	0.374532	18.1397	0.0543964	1	1	1	AKT2;
Tumors appear most often on sun-exposed regions	1	1	0.374532	72.0198	0.0138846	1	0.439062	1	TGFBR1;
Tumors are locally invasive	1	1	0.374532	72.0198	0.0138846	1	0.439062	1	TGFBR1;
Tumors are morphologically similar to well-differentiated squamous cell carcinoma	1	1	0.374532	72.0198	0.0138846	1	0.439062	1	TGFBR1;
Tumors leave pitting scars	1	1	0.374532	72.0198	0.0138846	1	0.439062	1	TGFBR1;
Tumors may show spontaneous regression	1	1	0.374532	72.0198	0.0138846	1	0.439062	1	PDGFRB;
Tumors of the sympathetic nervous system (5 to 10%)	1	6	0.374532	12.1032	0.0804787	1	1	1	RET;
Tumors undergo spontaneous resolution over a period of months	1	1	0.374532	72.0198	0.0138846	1	0.439062	1	TGFBR1;
Tumors usually develop between 40 and 60 years of age	2	4	0.749064	36.0997	0.00113135	1	0.438724	1	KIT; PDGFRA;
Turribrachycephaly	1	5	0.374532	14.519	0.0675284	1	1	1	FGFR1;
Two subtypes - seminoma and nonseminoma	3	3	1.1236	72.0198	2.64709e-06	0.0585113	0.00344184	0.0224086	FGFR3; KIT; STK11;
Ubiquitin-positive inclusions	1	2	0.374532	36.1891	0.027577	1	0.707971	1	MAPT;
Umbilical defect (redundant periumbilical skin)	1	2	0.374532	36.1891	0.027577	1	0.707971	1	PITX2;
Umbilical hernia	1	43	0.374532	1.69123	0.45222	1	1	1	ROR2;
Uncoordinated uterine contraction	1	1	0.374532	72.0198	0.0138846	1	0.439062	1	DMPK;
Underdeveloped labia	1	1	0.374532	72.0198	0.0138846	1	0.439062	1	AR;
Underdeveloped to normal clitoris	1	1	0.374532	72.0198	0.0138846	1	0.439062	1	AR;
Unerupted teeth	1	2	0.374532	36.1891	0.027577	1	0.707971	1	FGFR1;
Upper airway obstruction	1	2	0.374532	36.1891	0.027577	1	0.707971	1	FGFR3;
Upturned toenails	1	1	0.374532	72.0198	0.0138846	1	0.439062	1	FLT4;
Ureteral aplasia	1	3	0.374532	24.1661	0.0410801	1	0.916281	1	RET;
Ureteral polyps	1	1	0.374532	72.0198	0.0138846	1	0.439062	1	STK11;
Ureters	2	36	0.749064	4.01999	0.0889378	1	1	1	RET; STK11;
Urinary tract infections	1	3	0.374532	24.1661	0.0410801	1	0.916281	1	BTK;
Urinary urgency	1	18	0.374532	4.03887	0.222588	1	1	1	MAPT;
Urinary urgency (in 44% of patients)	1	1	0.374532	72.0198	0.0138846	1	0.439062	1	PINK1;
Urticaria pigmentosa or cutaneous mastocytosis (in patients with KIT mutations)	2	4	0.749064	36.0997	0.00113135	1	0.438724	1	KIT; PDGFRA;
Uterine cancer	1	1	0.374532	72.0198	0.0138846	1	0.439062	1	STK11;
Uterine prolapse	1	2	0.374532	36.1891	0.027577	1	0.707971	1	RPS6KA3;
Variable age at onset (8 to 62 years)	1	1	0.374532	72.0198	0.0138846	1	0.439062	1	TGFBR1;
Variable expression and severity	1	1	0.374532	72.0198	0.0138846	1	0.439062	1	FLT4;
Variable expressivity	1	7	0.374532	10.3766	0.0932498	1	1	1	PITX2;
Variable lumbar lordosis	1	1	0.374532	72.0198	0.0138846	1	0.439062	1	FGFR3;
Variable presentation and evolution of symptoms	1	1	0.374532	72.0198	0.0138846	1	0.439062	1	CSF1R;
Vascular	4	215	1.49813	1.34319	0.349382	1	1	1	AKT1; FLT4; NTRK1; RET;
Vascular ring	1	3	0.374532	24.1661	0.0410801	1	0.916281	1	AKT3;
Venous malformations	1	1	0.374532	72.0198	0.0138846	1	0.439062	1	AKT1;
Ventricles slightly enlarged	1	3	0.374532	24.1661	0.0410801	1	0.916281	1	AKT3;
Ventricular dilatation	1	7	0.374532	10.3766	0.0932498	1	1	1	RPS6KA3;
Ventricular septal defect	1	52	0.374532	1.39858	0.51714	1	1	1	AKT3;
Ventricular septal defect (in some patients)	1	3	0.374532	24.1661	0.0410801	1	0.916281	1	ERBB3;
Very poor corneal healing	1	1	0.374532	72.0198	0.0138846	1	0.439062	1	NTRK1;
Visceral multicentric involvement has a poorer prognosis than solitary lesions limited to the skin	1	1	0.374532	72.0198	0.0138846	1	0.439062	1	PDGFRB;
Visual hallucinations may occur	1	4	0.374532	18.1397	0.0543964	1	1	1	MAPT;
Vomiting	2	86	0.749064	1.68306	0.335863	1	1	1	BRAF; RET;
Wasting, especially temporal, neck, and facial muscles	1	1	0.374532	72.0198	0.0138846	1	0.439062	1	DMPK;
Weakness	1	16	0.374532	4.54341	0.200523	1	1	1	DMPK;
Weakness of the facial muscles	1	2	0.374532	36.1891	0.027577	1	0.707971	1	AR;
Weight	3	122	1.1236	1.77674	0.240329	1	1	1	IGF1R; NPR2; RPS6KA3;
Weight less than 3rd percentile	1	1	0.374532	72.0198	0.0138846	1	0.439062	1	RPS6KA3;
White at birth	1	2	0.374532	36.1891	0.027577	1	0.707971	1	OCA2;
White to golden blonde or red hair	1	2	0.374532	36.1891	0.027577	1	0.707971	1	OCA2;
Wide-cupped costochondral junctions	1	1	0.374532	72.0198	0.0138846	1	0.439062	1	FGFR3;
Widely spaced teeth	1	16	0.374532	4.54341	0.200523	1	1	1	ACVR1;
Wide or anteverted nostrils	1	1	0.374532	72.0198	0.0138846	1	0.439062	1	AKT1;
Wide palpebral fissures	1	3	0.374532	24.1661	0.0410801	1	0.916281	1	AKT3;
Wide palpebral fissures (34%)	1	1	0.374532	72.0198	0.0138846	1	0.439062	1	ROR2;
Wide-set eyes	1	3	0.374532	24.1661	0.0410801	1	0.916281	1	RET;
Wide-set nipples	1	1	0.374532	72.0198	0.0138846	1	0.439062	1	IGF1R;
Wide-spaced teeth	1	1	0.374532	72.0198	0.0138846	1	0.439062	1	RPS6KA3;
Wide Sylvian fissures with incomplete opercularization	1	3	0.374532	24.1661	0.0410801	1	0.916281	1	AKT3;
Word-finding difficulties	1	2	0.374532	36.1891	0.027577	1	0.707971	1	MAPT;
Worsening of symptoms during sleep	1	6	0.374532	12.1032	0.0804787	1	1	1	RET;
X-linked dominant	1	60	0.374532	1.21213	0.56838	1	1	1	RPS6KA3;
X-linked recessive	2	99	0.749064	1.46207	0.400592	1	1	1	AR; BTK;
Yellow' hair occurs in individuals of African descent	1	2	0.374532	36.1891	0.027577	1	0.707971	1	OCA2;

## Sheet: COSMIC
Analysis: COSMIC
Dataset name: Client proteins of Hsp90-Cdc37
Number of genes in the dataset: 267
Number of genes in the dataset (which are available in COSMIC database) :267
Number of genes in background: 19230
Is analysis quantitative: No
						Corrected p-values
COSMIC	No. of genes in the dataset	No.of genes in the background dataset	Percentage of genes	Fold enrichment	P-value (Hypergeometric test)	Bonferroni method	BH method	Q-value (Storey-Tibshirani method)
skin	213	11549	79.7753	1.32833	3.55217e-12	1.49191e-10	2.1313e-11	2.66471e-11	ABL1; ACVR1; ACVR1C; ACVR2B; ADRBK1; AKT1; AKT2; AKT3; ALK; AMHR2; AR; ARAF; AURKB; AURKC; AXL; BLK; BMP2K; BMPR1A; BMX; BRAF; BTK; CAMK1G; CAMK2B; CAMK2D; CAMK2G; CAMK4; CAMKK1; CAMKK2; CAMKV; CDC25C; CDC7; CDK10; CDK11B; CDK14; CDK15; CDK18; CDK19; CDK20; CDK6; CHEK1; CHUK; CLK2; CSF1R; CSNK2A1; DAPK1; DAPK2; DCLK2; DDR1; DDR2; DMPK; DPF1; DYRK1A; DYRK1B; DYRK2; DYRK4; EGFR; EIF2AK1; EPHA1; EPH…
prostate	175	9587	65.5431	1.31472	1.373e-07	5.76662e-06	4.43586e-07	5.54604e-07	ABL1; ACVR1B; ACVR1C; ADRBK1; AKT1; AKT2; ALK; AMHR2; AR; AXL; BMP2K; BRAF; BTK; CAMK1G; CAMK2D; CAMK4; CAMKK2; CDC7; CDK11A; CDK11B; CDK17; CDK18; CDK19; CDK4; CHUK; CLK2; CLK3; CSF1R; CSNK1D; CSNK2A1; DAPK1; DCLK2; DDR1; DDR2; DSTYK; DUS3L; DYRK1A; DYRK2; DYRK4; EGFR; EIF2AK1; ELK3; EPHA1; EPHA10; EPHA2; EPHA4; EPHB1; EPHB6; ERBB2; ERBB3; ERBB4; FES; FGFR3; FGR; FLT3; FLT4; FRK; GRK4; GRK6; GSG…
biliary tract	41	1799	15.3558	1.64175	0.00107085	0.0449758	0.0021417	0.00267772	AMHR2; AR; ARAF; BRAF; CAMK2B; CDK14; DYRK1B; DYRK4; EGFR; EPHA1; EPHA2; EPHB1; EPHB6; ERBB4; FER; FGFR1; FGFR3; HCK; INSRR; KIT; LRRK2; MAP3K15; MAPK14; MAST2; PAK7; PDPK1; PRKAA2; PRKCH; PRKCZ; PRKD2; RAF1; RPS6KC1; SGK3; STK11; STK36; TGFBR2; TIE1; TNK2; TNNI3K; ULK1; ZNF843;
CancerGeneCensus geneList	25	503	9.3633	3.58087	4.01363e-08	1.68573e-06	1.40477e-07	1.75635e-07	ABL1; AKT1; AKT2; ALK; BMPR1A; BRAF; CDK4; CDK6; EGFR; ERBB2; FGFR1; FGFR3; FLT3; ITK; JAK1; KIT; LCK; NTRK1; NTRK3; PDGFRA; PDGFRB; PIM1; RAF1; RET; STK11;
lung	257	15353	96.2547	1.20561	3.02131e-15	1.26895e-13	4.22984e-14	5.28846e-14	ABL1; ACVR1; ACVR1B; ACVR1C; ACVR2B; ADRBK1; AKT1; AKT2; AKT3; ALK; AMHR2; AR; ARAF; AURKB; AURKC; AXL; BLK; BMP2K; BMPR1A; BMX; BRAF; BTK; CAMK1G; CAMK2A; CAMK2B; CAMK2D; CAMK2G; CAMK4; CAMKK1; CAMKK2; CAMKV; CDC25C; CDC7; CDK1; CDK10; CDK11B; CDK14; CDK15; CDK17; CDK18; CDK19; CDK2; CDK20; CDK4; CDK9; CHEK1; CHUK; CLK2; CLK3; CSF1R; CSNK1D; CSNK2A1; DAPK1; DAPK2; DAPK3; DCLK2; DDR1; DDR2; DMPK;…
autonomic ganglia	15	736	5.61798	1.46875	0.0897004	1	0.125581	0.15701	ALK; CSNK2A1; EGFR; FGFR1; MAP2K7; MAPK3; MAPK7; PRKACG; PRKCQ; PTK2; PTK6; RAF1; ROR2; RPS6KA3; ZNF610;
meninges	9	447	3.37079	1.45164	0.171047	1	0.211293	0.264175	AKT1; CAMK2D; CAMKK2; ERBB3; ITK; RPS6KA2; TSSK3; TYRO3; ULK2;
kidney	226	13456	84.6442	1.20966	1.72045e-08	7.22587e-07	7.22587e-08	9.03433e-08	ABL1; ACVR1; ACVR1B; ACVR1C; ACVR2B; ADRBK1; AKT1; AKT2; AKT3; ALK; AMHR2; AR; ARAF; AURKB; AURKC; AXL; BLK; BMP2K; BMPR1A; BMX; BRAF; BTK; CAMK2A; CAMK2B; CAMK2D; CAMK2G; CAMK4; CAMKK1; CAMKK2; CDC25C; CDC7; CDK1; CDK10; CDK11A; CDK11B; CDK14; CDK15; CDK17; CDK18; CDK19; CDK2; CDK20; CDK4; CDK6; CDK9; CLK3; CSF1R; DAPK1; DAPK2; DAPK3; DCLK2; DDR1; DDR2; DMPK; DSTYK; DUS3L; DYRK1A; DYRK2; DYRK4; …
endometrium	218	12807	81.6479	1.22597	2.63594e-08	1.1071e-06	1.00645e-07	1.25834e-07	ABL1; ACVR1; ACVR1B; ACVR1C; ACVR2B; ADRBK1; AKT1; AKT3; ALK; AMHR2; AR; ARAF; AURKB; AURKC; AXL; BLK; BMP2K; BMPR1A; BMX; BRAF; BTK; CAMK2A; CAMK2B; CAMK2D; CAMK2G; CAMK4; CAMKK1; CAMKK2; CAMKV; CDC25C; CDC7; CDK10; CDK14; CDK15; CDK17; CDK18; CDK19; CDK2; CDK20; CDK4; CDK6; CDK9; CHEK1; CHUK; CLK2; CLK3; CSF1R; CSNK2A1; DAPK1; DAPK2; DCLK2; DDR1; DDR2; DMPK; DSTYK; DUS3L; DYRK1A; DYRK2; DYRK4; …
stomach	113	1289	42.3221	6.31412	6.13395e-62	2.57626e-60	2.57626e-60	3.22103e-60	ABL1; ACVR1; ACVR1C; AKT3; ALK; AXL; BLK; BMPR1A; BRAF; CAMK2D; CAMK2G; CAMKK2; CDC7; CDK10; CDK11A; CDK18; CDK2; CLK3; DAPK2; DCLK2; DYRK1B; EGFR; EIF2AK1; EPHA10; EPHA2; EPHB1; EPHB6; ERBB2; ERBB3; ERBB4; ERN1; FASTK; FER; FGFR1; FLT3; FLT4; GRK4; GRK6; GRK7; HIPK4; IKBKB; INSRR; ITK; JAK1; KIT; KSR1; KSR2; LCK; LIMK1; LRRK2; MAP2K5; MAP2K6; MAP3K14; MAP3K15; MAP3K6; MAP3K7; MAP3K9; MAP4K2; MAP…
peritoneum	1	3	0.374532	24.1661	0.0410801	1	0.0616202	0.0770422	EGFR;
large intestine	267	17427	100	1.10346	3.16362e-12	1.32872e-10	2.1313e-11	2.66471e-11	ABL1; ACVR1; ACVR1B; ACVR1C; ACVR2B; ADRBK1; AKT1; AKT2; AKT3; ALK; AMHR2; AR; ARAF; AURKB; AURKC; AXL; BLK; BMP2K; BMPR1A; BMX; BRAF; BTK; CAMK1G; CAMK2A; CAMK2B; CAMK2D; CAMK2G; CAMK4; CAMKK1; CAMKK2; CAMKV; CDC25C; CDC7; CDK1; CDK10; CDK11A; CDK11B; CDK14; CDK15; CDK17; CDK18; CDK19; CDK2; CDK20; CDK4; CDK6; CDK9; CDKL4; CHEK1; CHUK; CLK2; CLK3; CSF1R; CSNK1D; CSNK2A1; DAPK1; DAPK2; DAPK3; DCL…
parathyroid	4	202	1.49813	1.42963	0.308545	1	0.370254	0.462919	CDK15; EIF2AK1; NTRK1; ZNF569;
gastrointestinal tract (site indeterminate)	2	4	0.749064	36.0997	0.00113135	0.0475165	0.00215984	0.0027004	PDGFRA; STK11;
genital tract	1	6	0.374532	12.1032	0.0804787	1	0.116555	0.145726	KIT;
soft tissue	7	186	2.62172	2.71415	0.0153841	0.646133	0.0269222	0.0336602	AKT1; ALK; BRAF; EGFR; KIT; PDGFRA; PTK2B;
central nervous system	221	12014	82.7715	1.32488	2.50031e-13	1.05013e-11	2.10026e-12	2.6259e-12	ABL1; ACVR1; ACVR1C; ADRBK1; AKT1; AKT3; ALK; AMHR2; AR; AURKB; AXL; BLK; BMP2K; BMPR1A; BMX; BRAF; BTK; CAMK1G; CAMK2A; CAMK2B; CAMK2D; CAMK2G; CAMK4; CAMKK1; CAMKV; CDC7; CDK11A; CDK15; CDK17; CDK19; CDK2; CDK20; CDK4; CDK6; CHEK1; CHUK; CSF1R; CSNK1D; CSNK2A1; DAPK1; DAPK2; DAPK3; DCLK2; DDR1; DDR2; DMPK; DPF1; DSTYK; DUS3L; DYRK1A; DYRK1B; DYRK2; DYRK4; EGFR; EIF2AK1; ELK3; EPHA1; EPHA10; EPH…
eye	10	461	3.74532	1.56378	0.11015	1	0.144572	0.180755	BMP2K; BRAF; EPHA2; FGFR1; GTF2F1; KIT; OCA2; PTK2B; TNK2; TYK2;
ovary	230	12007	86.1423	1.37963	4.60627e-18	1.93463e-16	9.67317e-17	1.20941e-16	ABL1; ACVR1; ACVR1B; ACVR1C; ACVR2B; ADRBK1; AKT1; ALK; AMHR2; AR; ARAF; AURKB; AURKC; AXL; BLK; BMP2K; BMPR1A; BMX; BRAF; BTK; CAMK2A; CAMK2B; CAMK2D; CAMK4; CAMKK1; CAMKK2; CAMKV; CDC7; CDK1; CDK10; CDK11A; CDK11B; CDK14; CDK15; CDK17; CDK19; CDK20; CDK4; CDK9; CDKL4; CHUK; CLK2; CSF1R; CSNK1D; CSNK2A1; DAPK1; DAPK2; DAPK3; DCLK2; DDR1; DDR2; DMPK; DPF1; DUS3L; DYRK1A; DYRK1B; DYRK2; DYRK4; EGF…
bone	20	1330	7.49064	1.08354	0.388701	1	0.453484	0.56698	AKT1; BRAF; CDK20; CSNK2A1; DAPK3; EGFR; ERBB3; ERBB4; FASTK; FLT4; HIPK4; IKBKB; IRAK2; IRAK3; PASK; PRKG2; RPS6KA4; STK38; TIE1; TUT1;
pleura	1	9	0.374532	8.07325	0.118264	1	0.150518	0.188189	EGFR;
testis	4	10	1.49813	28.8511	7.14557e-06	0.000300114	1.76538e-05	2.20721e-05	FGFR3; KIT; SIK1; STK11;
240 NB cases mutantgeneList	80	3941	29.9625	1.46214	0.000144789	0.00608114	0.00032006	0.000400163	ACVR1; ACVR1C; ALK; AR; AXL; BLK; BMX; CAMK1G; CAMK2A; CAMK2G; CDK10; CSF1R; CSNK2A1; DDR2; DUS3L; DYRK4; EGFR; EIF2AK2; EPHA2; EPHB1; ERBB3; ERBB4; ERN1; FGFR1; FLT3; FLT4; GRK4; KIT; KSR2; LIMK2; MAP2K6; MAP2K7; MAP3K12; MAP3K2; MAPK3; MAST2; MATK; MERTK; MINK1; MUSK; MYLK2; MYLK3; MYO3B; NEK11; NEK8; NEK9; NTRK2; NTRK3; PASK; PDGFRA; PDGFRB; PDPK1; PITX2; PKN2; PRKAA2; PRKACG; PRKCG; PRKCQ; PR…
haematopoietic and lymphoid tissue	166	8977	62.1723	1.33185	2.18137e-07	9.16173e-06	6.5441e-07	8.18192e-07	ABL1; ACVR1; ACVR1B; ACVR1C; ACVR2B; ADRBK1; AKT3; ALK; AMHR2; AURKB; AXL; BMPR1A; BRAF; BTK; CAMK2A; CAMK2B; CAMK2G; CAMK4; CAMKK2; CDC7; CDK10; CDK11A; CDK14; CDK17; CDK18; CDK19; CDK20; CDK4; CDK6; CHEK1; CLK3; CSF1R; DAPK1; DAPK2; DAPK3; DDR2; DMPK; DUS3L; DYRK1A; DYRK1B; DYRK4; EGFR; EIF2AK1; EIF2AK2; EPHA10; EPHA2; EPHB1; EPHB6; ERBB2; ERBB3; ERBB4; ERN1; FGFR1; FGFR3; FGR; FLT3; GRK6; GRK7…
breast	251	14924	94.0075	1.21132	1.78649e-13	7.50327e-12	1.87582e-12	2.34529e-12	ABL1; ACVR1; ACVR1B; ACVR1C; ADRBK1; AKT1; AKT2; AKT3; ALK; AMHR2; AR; ARAF; AURKB; AURKC; AXL; BLK; BMP2K; BMPR1A; BMX; BRAF; BTK; CAMK1G; CAMK2A; CAMK2B; CAMK2D; CAMK2G; CAMK4; CAMKK1; CAMKK2; CDC25C; CDC7; CDK1; CDK10; CDK11A; CDK11B; CDK14; CDK15; CDK17; CDK18; CDK19; CDK2; CDK20; CDK4; CDK6; CDK9; CDKL4; CHEK1; CHUK; CLK2; CLK3; CSF1R; CSNK1D; CSNK2A1; DAPK1; DAPK2; DAPK3; DCLK2; DDR1; DDR2;…
thymus	2	3	0.749064	48.093	0.000570912	0.0239783	0.00119892	0.00149898	EGFR; KIT;
upper aerodigestive tract	118	6364	44.1948	1.33549	9.2386e-05	0.00388021	0.000215567	0.000269519	ABL1; ACVR1B; ACVR1C; AKT1; AKT2; ALK; AMHR2; AR; AXL; BMP2K; BRAF; CAMK1G; CAMKK2; CAMKV; CDK18; CDK2; CDK20; CHEK1; CHUK; DAPK1; DCLK2; DDR1; EGFR; EIF2AK1; ELK3; EPHA1; EPHA10; EPHA2; EPHB1; EPHB6; ERBB2; ERBB3; ERBB4; ERN1; FGFR3; FLT3; FLT4; GRK4; GRK6; GRK7; GSG2; HCK; HIPK4; IGF1R; INSRR; IRAK1; IRAK3; JAK1; KSR2; LIMK1; LRRK2; MAP3K1; MAP3K12; MAP3K3; MAP3K5; MAP3K6; MAP3K7; MAP3K9; MAP4K…
cervix	48	2590	17.9775	1.335	0.0216091	0.907584	0.0349071	0.0436434	ACVR1C; ADRBK1; AKT2; AKT3; AMHR2; AR; BRAF; CDK11A; CDK14; CLK3; DAPK3; DDR2; DYRK4; ELK3; EPHA2; EPHA4; EPHB6; ERBB4; FGFR3; IGF1R; JAK1; KSR2; LIMK1; LRRK2; MAP3K15; MAP3K5; MAP3K8; MAP3K9; MAP4K2; MYLK4; NEK8; PAK6; PDGFRB; PKN1; PRKCA; PRKCB; RPS6KA1; RPS6KA2; STK11; STK32B; STK33; STK36; TAOK3; TARDBP; TIE1; TNNI3K; TYRO3; ZNF334;
thyroid	143	8760	53.5581	1.17575	0.00498132	0.209215	0.00909632	0.0113729	ABL1; ACVR1B; ACVR2B; AKT2; ALK; AMHR2; AR; ARAF; AURKB; AXL; BLK; BMP2K; BRAF; CAMK2A; CAMK2B; CAMK4; CAMKK2; CAMKV; CDK11A; CDK11B; CHUK; CLK3; CSF1R; DAPK1; DAPK3; DCLK2; DDR1; DMPK; DSTYK; DUS3L; DYRK1A; DYRK1B; DYRK2; EGFR; EIF2AK1; EIF2AK2; EPHA1; EPHA10; EPHA2; EPHA4; EPHB1; EPHB6; ERBB2; ERN1; FASTK; FER; FES; FGFR1; FGFR3; FLT3; FLT4; FYN; GRK6; GSG2; GTF2F1; HIPK4; INSRR; IRAK1; IRAK2; …
liver	229	14176	85.7678	1.16346	1.28417e-06	5.39353e-05	3.59569e-06	4.4956e-06	ABL1; ACVR1; ACVR1B; ACVR2B; ADRBK1; AKT1; AKT3; ALK; AR; ARAF; AURKB; AXL; BLK; BMP2K; BMPR1A; BMX; BRAF; BTK; CAMK1G; CAMK2A; CAMK2B; CAMK2D; CAMK2G; CAMKK1; CAMKK2; CAMKV; CDC25C; CDC7; CDK10; CDK11B; CDK14; CDK15; CDK17; CDK2; CDK9; CDKL4; CHEK1; CHUK; CLK2; CLK3; CSF1R; CSNK1D; CSNK2A1; DAPK1; DAPK3; DCLK2; DDR1; DDR2; DPF1; DSTYK; DUS3L; DYRK1A; DYRK1B; DYRK2; DYRK4; EGFR; EIF2AK1; EIF2AK2;…
pancreas	218	12286	81.6479	1.27796	1.21561e-10	5.10556e-09	5.67284e-10	7.09262e-10	ABL1; ACVR1; ACVR1B; ACVR1C; ACVR2B; ADRBK1; AKT3; ALK; AMHR2; AR; ARAF; AURKB; AXL; BLK; BMP2K; BMPR1A; BMX; BRAF; BTK; CAMK2A; CAMK2B; CAMK2G; CAMK4; CAMKK2; CDC7; CDK1; CDK10; CDK11A; CDK11B; CDK15; CDK19; CDK2; CDK4; CDK6; CDK9; CHUK; CLK2; CLK3; CSF1R; CSNK1D; CSNK2A1; DAPK1; DAPK2; DCLK2; DDR2; DMPK; DPF1; DSTYK; DUS3L; DYRK1A; DYRK1B; DYRK4; EGFR; EIF2AK1; EIF2AK2; ELK3; EPHA1; EPHA10; EPH…
neuroblastoma	15	744	5.61798	1.45296	0.0960085	1	0.130076	0.162631	ALK; CSNK2A1; EGFR; FGFR1; MAP2K7; MAPK3; MAPK7; PRKACG; PRKCQ; PTK2; PTK6; RAF1; ROR2; RPS6KA3; ZNF610;
oesophagus	114	5660	42.6966	1.4507	2.41075e-06	0.000101252	6.32822e-06	7.91202e-06	ABL1; ACVR1; ADRBK1; AKT3; ALK; AR; ARAF; AURKC; AXL; BMX; BRAF; CAMK2B; CAMK4; CAMKK1; CDK11A; CDK11B; CDK20; CHEK1; CHUK; CLK3; CSF1R; CSNK1D; DAPK1; DDR1; DPF1; DYRK1A; DYRK4; EGFR; EIF2AK1; EPHA1; EPHA10; EPHA2; EPHB1; ERBB3; ERBB4; FGFR1; FGR; FLT3; FLT4; GRK4; GSG2; HCK; HIPK4; IKBKB; INSRR; IRAK3; KIT; KSR1; KSR2; LIMK1; LRRK2; MAP2K7; MAP3K1; MAP3K12; MAP3K15; MAP3K3; MAP3K6; MAP4K4; MAPK…
adrenal gland	3	53	1.1236	4.08941	0.037278	1	0.0579881	0.0725011	ALK; BRAF; RET;
urinary tract	230	13085	86.1423	1.26597	5.90398e-12	2.47967e-10	3.09959e-11	3.87534e-11	ABL1; ACVR1; ACVR1B; ACVR1C; ACVR2B; ADRBK1; AKT1; AKT3; ALK; AMHR2; AR; ARAF; AURKB; AXL; BLK; BMP2K; BMPR1A; BMX; BRAF; BTK; CAMK1G; CAMK2B; CAMK2D; CAMK2G; CAMK4; CAMKK2; CAMKV; CDC25C; CDC7; CDK1; CDK10; CDK11A; CDK11B; CDK14; CDK15; CDK18; CDK19; CDK2; CDK20; CDK4; CDK6; CDKL4; CHUK; CLK3; CSF1R; CSNK1D; CSNK2A1; DAPK1; DAPK2; DAPK3; DCLK2; DDR1; DDR2; DMPK; DPF1; DSTYK; DYRK1A; DYRK1B; DYRK…
small intestine	7	196	2.62172	2.57568	0.0199039	0.835965	0.0334386	0.0418074	BRAF; CSF1R; ERBB2; MAP4K1; STK11; STYK1; ZBTB40;
salivary gland	6	555	2.24719	0.779876	0.786267	1	0.892519	1	CAMK4; INSRR; IRAK1; MAP3K9; PRKD2; TIE1;
